# Supplementary material for: Video Games as a Potential Modality for Behavioral Health Services for Young Adult Veterans: Exploratory Analysis
Source: PubMed Central journal article supplement (PMC6085553; doi:10.2196/games.9327), 2018-07-26
Supplement: games_v6i3e15_app2.pdf [file games_v6i3e15_app2.pdf]

## Multimedia Appendix 2. Comparison of measures in Study 1 and Study 2

| Measure                                  | Study 1                                                                                    | Study 2                                         |
|------------------------------------------|--------------------------------------------------------------------------------------------|-------------------------------------------------|
| Demographics                             |                                                                                            |                                                 |
| Age                                      | What is your age?                                                                          |                                                 |
| Gender                                   | What is your gender?                                                                       |                                                 |
| Hispanic/Latino(a)                       | Are you Hispanic/Latino(a)?                                                                |                                                 |
| Ethnicity                                | What is your ethnicity?                                                                    | What is your race/ethnicity?                    |
| Education                                | What is your highest level of education?                                                   |                                                 |
| Currently in college                     | Are you currently in college?                                                              |                                                 |
| Annual household income                  | What is your annual household income from all sources?                                     |                                                 |
| Marital status                           | What is your current marital status?                                                       |                                                 |
| Number of children                       | How many children (including step-children) do you have?                                   |                                                 |
| Number of children living at home        | How many of these children live in your home with you?                                     |                                                 |
| Branch of service                        | What is your former branch of service?                                                     |                                                 |
| Mental health                            |                                                                                            |                                                 |
| Positive screen for PTSD                 | Primary Care Posttraumatic Stress Disorder scale                                           | PTSD Checklist                                  |
| Positive screen for depressive disorder  | 2-item Patient Health Questionnaire                                                        | 8-item Patient Health Questionnaire             |
| Substance use                            |                                                                                            |                                                 |
| Positive screen for alcohol use disorder | Alcohol Use Disorders Identification Test                                                  |                                                 |
| Total drinking days                      | Days in past 30 days in which participant had at least one drink of any alcoholic beverage |                                                 |
| Drinks per drinking day                  | Average number of drinks on drinking days in past 30 days                                  |                                                 |
| Heavy drinking occasions                 | Number of times participant drank heavily in past 30 days                                  |                                                 |
| Peak drinks on a drinking day            | Largest number of drinks consumed on any one occasion in past 30 days                      |                                                 |
| Alcohol consequences                     | Brief Young Adult Alcohol Consequences Questionnaire                                       |                                                 |
| Any cannabis use in past 6 months        | Have you used any cannabis?                                                                | How often have you used marijuana?              |
| Total cannabis use days                  | How many days did you use cannabis?                                                        | How many days did you use marijuana?            |
| Behavioral health services use           |                                                                                            |                                                 |
| Any mental health care since discharge   | Any mental health care at VA or elsewhere                                                  |                                                 |
| Any mental health care in past year      | Any mental health care at VA or elsewhere                                                  |                                                 |
| Any mental health care in past month     | Any mental health care at VA or elsewhere                                                  |                                                 |
| Any substance use care since discharge   | Any substance use care at VA or elsewhere                                                  |                                                 |
| Any substance use care in past year      | Any substance use care at VA or elsewhere                                                  |                                                 |
| Any substance use care in past month     | Any substance use care at VA or elsewhere                                                  |                                                 |
| Video game use                           |                                                                                            |                                                 |
| Total hours spent playing per day        | Average of typical hours on each day of week                                               | Self-reported average of hours on a typical day |
| Total hours spent playing per week       | Sum of typical hours on each day of week                                                   | Self-reported hours per day by days per week    |
| Total days spent playing per week        | Sum of days of the week of self-reported playing                                           | Self-reported days in a typical week            |

Notes: PTSD = Posttraumatic Stress Disorder; VA = Veterans Affairs.
