# Supplementary material for: Video Games as a Potential Modality for Behavioral Health Services for Young Adult Veterans: Exploratory Analysis
Source: PubMed Central journal article supplement (PMC6085553; doi:10.2196/games.9327), 2018-07-26
Supplement: games_v6i3e15_app3.pdf [file games_v6i3e15_app3.pdf]

### Multimedia Appendix 3. Exploratory replication analyses of video game use by young adult veterans

| Parameter                                   | Hours per day     |                     | Hours per week    |                     | Days per week     |                     |
|---------------------------------------------|-------------------|---------------------|-------------------|---------------------|-------------------|---------------------|
|                                             | Replicated Effect | MD                  | Replicated Effect | MD                  | Replicated Effect | MD                  |
| Video game use by positive screen           |                   |                     |                   |                     |                   |                     |
| Any positive screen                         | No                | 0.32 (-0.04, 0.67)  | No                | 2.61 (0.11, 5.10)*  | No                | 0.32 (-0.03, 0.66)  |
| Any mental health screen                    | Yes               | 0.61 (0.30, 0.92)*  | Yes               | 4.74 (2.54, 6.94)*  | No                | 0.41 (0.13, 0.70)*  |
| PTSD screen                                 | Yes               | 0.58 (0.25, 0.90)*  | Yes               | 4.64 (2.30, 6.98)*  | No                | 0.40 (0.10, 0.69)*  |
| Depression screen                           | Yes               | 0.61 (0.30, 0.92)*  | Yes               | 4.77 (2.56, 6.99)*  | No                | 0.39 (0.11, 0.68)*  |
| Any SUD screen                              | No                | -0.15 (-0.47, 0.16) | No                | -0.87 (-3.13, 1.39) | No                | 0.07 (-0.22, 0.35)  |
| AUD screen                                  | No                | -0.11 (-0.42, 0.20) | No                | -0.37 (-2.63, 1.88) | No                | 0.20 (-0.10, 0.50)  |
| Cannabis use                                | No                | -0.26 (-0.62, 0.09) | No                | -1.32 (-3.89, 1.25) | No                | 0.04 (-0.32, 0.40)  |
| Video game use by services receipt          |                   |                     |                   |                     |                   |                     |
| Any services (any screen)                   |                   |                     |                   |                     |                   |                     |
| Since discharge                             | No                | 0.29 (-0.06, 0.64)  | No                | 2.67 (0.14, 5.20)*  | No                | 0.48 (0.14, 0.82)*  |
| Past year                                   | No                | 0.04 (-0.31, 0.40)  | No                | 0.26 (-2.34, 2.85)  | No                | 0.15 (-0.18, 0.48)  |
| Past month                                  | No                | 0.22 (-0.27, 0.71)  | No                | 0.91 (-2.58, 4.41)  | No                | 0.26 (-0.15, 0.67)  |
| Mental health services (PTSD or depression) |                   |                     |                   |                     |                   |                     |
| Since discharge                             | No                | 0.31 (-0.18, 0.79)  | No                | 2.84 (-0.63, 6.32)  | No                | 0.36 (-0.12, 0.83)  |
| Past year                                   | No                | -0.09 (-0.55, 0.37) | No                | -0.83 (-4.21, 2.56) | No                | 0.09 (-0.32, 0.50)  |
| Past month                                  | No                | 0.14 (-0.44, 0.72)  | No                | -0.15 (-4.31, 4.01) | No                | 0.05 (-0.41, 0.51)  |
| Mental health services (PTSD)               |                   |                     |                   |                     |                   |                     |
| Since discharge                             | No                | 0.22 (-0.38, 0.82)  | No                | 2.62 (-1.67, 6.91)  | No                | 0.41 (-0.15, 0.97)  |
| Past year                                   | No                | -0.29 (-0.82, 0.25) | No                | -2.46 (-6.42, 1.49) | No                | 0.03 (-0.44, 0.50)  |
| Past month                                  | No                | 0.10 (-0.54, 0.74)  | No                | -0.97 (-5.57, 3.63) | No                | -0.13 (-0.63, 0.37) |
| Mental health services (depression)         |                   |                     |                   |                     |                   |                     |
| Since discharge                             | No                | 0.27 (-0.23, 0.78)  | No                | 2.15 (-1.49, 5.79)  | No                | 0.22 (-0.27, 0.70)  |
| Past year                                   | No                | -0.10 (-0.58, 0.38) | No                | -0.93 (-4.43, 2.57) | No                | 0.09 (-0.33, 0.51)  |
| Past month                                  | No                | 0.17 (-0.44, 0.77)  | No                | 0.10 (-4.23, 4.43)  | No                | 0.08 (-0.40, 0.56)  |
| Substance use services (AUD or cannabis)    |                   |                     |                   |                     |                   |                     |
| Since discharge                             | No                | 0.10 (-0.37, 0.56)  | No                | 1.57 (-1.65, 4.78)  | No                | 0.75 (0.28, 1.21)*  |
| Past year                                   | No                | -0.29 (-0.82, 0.25) | No                | -1.40 (-5.28, 2.48) | No                | 0.44 (-0.17, 1.05)  |
| Past month                                  | N/A               | N/A                 | N/A               | N/A                 | N/A               | N/A                 |
| Substance use services (AUD)                |                   |                     |                   |                     |                   |                     |
| Since discharge                             | No                | 0.37 (-0.22, 0.95)  | No                | 3.71 (-0.50, 7.92)  | No                | 0.92 (0.35, 1.49)*  |
| Past year                                   | No                | 0.06 (-0.73, 0.85)  | No                | -1.25 (-5.36, 2.86) | No                | 0.76 (-0.06, 1.57)  |
| Past month                                  | N/A               | N/A                 | N/A               | N/A                 | N/A               | N/A                 |
| Substance use services (cannabis)           |                   |                     |                   |                     |                   |                     |
| Since discharge                             | No                | -0.30 (-0.90, 0.30) | No                | -0.59 (-4.83, 3.65) | No                | 0.70 (0.03, 1.36)*  |
| Past year                                   | No                | -0.51 (-1.17, 0.15) | No                | -2.03 (-6.71, 2.64) | No                | 0.53 (-0.22, 1.29)  |
| Past month                                  | N/A               | N/A                 | N/A               | N/A                 | N/A               | N/A                 |

Notes: Replicated =  $p < .05$  and difference in same direction in both studies. MD = mean difference (95% CI) from fixed-effect meta-analysis of both studies. AUD = alcohol use disorder. N/A = Not applicable. PTSD = posttraumatic stress disorder. SUD = substance use disorder. \*  $p < .05$ .
