# Supplementary material for: Video Games as a Potential Modality for Behavioral Health Services for Young Adult Veterans: Exploratory Analysis
Source: PubMed Central journal article supplement (PMC6085553; doi:10.2196/games.9327), 2018-07-26
Supplement: games_v6i3e15_app4.pdf [file games_v6i3e15_app4.pdf]

## Table of Contents

|                                              |    |
|----------------------------------------------|----|
| Packages and Datasets.....                   | 9  |
| Demographics.....                            | 15 |
| Age.....                                     | 15 |
| Gender.....                                  | 16 |
| Hispanic ethnicity.....                      | 16 |
| Race.....                                    | 17 |
| Highest education level.....                 | 17 |
| Currently in college.....                    | 18 |
| Annual household income.....                 | 19 |
| Marital status.....                          | 19 |
| Children.....                                | 20 |
| Children living at home.....                 | 21 |
| Military branch.....                         | 22 |
| Behavioral Health.....                       | 22 |
| PTSD.....                                    | 22 |
| Depression.....                              | 23 |
| AUDIT.....                                   | 23 |
| Total drinking days.....                     | 24 |
| Drinks per drinking day.....                 | 25 |
| Heavy drinking occasions.....                | 26 |
| Peak drinks on a drinking day.....           | 26 |
| Alcohol consequences.....                    | 27 |
| Any cannabis use in past 6 months.....       | 28 |
| Total cannabis use days in past 30 days..... | 28 |
| Care Receipt.....                            | 29 |
| Behavioral Health - Discharge.....           | 29 |
| Behavioral Health - Year.....                | 30 |
| Behavioral Health - Month.....               | 30 |
| Mental Health - Discharge.....               | 31 |
| Mental Health - Year.....                    | 32 |
| Mental Health - Month.....                   | 32 |
| Substance Use - Discharge.....               | 33 |

|                                         |    |
|-----------------------------------------|----|
| Substance Use - Year.....               | 33 |
| Substance Use - Month.....              | 34 |
| Video Game Behavior.....                | 35 |
| Total hours spent playing per day.....  | 35 |
| Total hours spent playing per week..... | 35 |
| Total days spent playing per week.....  | 36 |
| Any positive screen.....                | 37 |
| Replicated Effect.....                  | 37 |
| Hours per day.....                      | 37 |
| Hours per week.....                     | 38 |
| Days per week.....                      | 38 |
| MD.....                                 | 39 |
| Hours per day.....                      | 39 |
| Hours per week.....                     | 41 |
| Days per week.....                      | 42 |
| Any mental health screen.....           | 44 |
| Replicated Effect.....                  | 44 |
| Hours per day.....                      | 44 |
| Hours per week.....                     | 45 |
| Days per week.....                      | 45 |
| MD.....                                 | 46 |
| Hours per day.....                      | 46 |
| Hours per week.....                     | 48 |
| Days per week.....                      | 49 |
| PTSD screen.....                        | 51 |
| Replicated Effect.....                  | 51 |
| Hours per day.....                      | 51 |
| Hours per week.....                     | 52 |
| Days per week.....                      | 52 |
| MD.....                                 | 53 |
| Hours per day.....                      | 53 |
| Hours per week.....                     | 54 |
| Days per week.....                      | 56 |
| Depression screen.....                  | 57 |

|                        |    |
|------------------------|----|
| Replicated Effect..... | 57 |
| Hours per day.....     | 57 |
| Hours per week.....    | 58 |
| Days per week.....     | 59 |
| MD.....                | 60 |
| Hours per day.....     | 60 |
| Hours per week.....    | 61 |
| Days per week.....     | 63 |
| Any SUD screen.....    | 64 |
| Replicated Effect..... | 64 |
| Hours per day.....     | 64 |
| Hours per week.....    | 65 |
| Days per week.....     | 66 |
| MD.....                | 67 |
| Hours per day.....     | 67 |
| Hours per week.....    | 68 |
| Days per week.....     | 70 |
| AUD screen.....        | 71 |
| Replicated Effect..... | 71 |
| Hours per day.....     | 71 |
| Hours per week.....    | 72 |
| Days per week.....     | 73 |
| MD.....                | 74 |
| Hours per day.....     | 74 |
| Hours per week.....    | 75 |
| Days per week.....     | 76 |
| Cannabis screen.....   | 78 |
| Replicated Effect..... | 78 |
| Hours per day.....     | 78 |
| Hours per week.....    | 79 |
| Days per week.....     | 80 |
| MD.....                | 80 |
| Hours per day.....     | 80 |
| Hours per week.....    | 82 |

|                                     |     |
|-------------------------------------|-----|
| Days per week.....                  | 83  |
| Any care - Discharge.....           | 85  |
| Replicated Effect.....              | 85  |
| Hours per day.....                  | 85  |
| Hours per week.....                 | 86  |
| Days per week.....                  | 86  |
| MD.....                             | 87  |
| Hours per day.....                  | 87  |
| Hours per week.....                 | 89  |
| Days per week.....                  | 90  |
| Any care - Year.....                | 92  |
| Replicated Effect.....              | 92  |
| Hours per day.....                  | 92  |
| Hours per week.....                 | 93  |
| Days per week.....                  | 93  |
| MD.....                             | 94  |
| Hours per day.....                  | 94  |
| Hours per week.....                 | 96  |
| Days per week.....                  | 97  |
| Any care - Month.....               | 99  |
| Replicated Effect.....              | 99  |
| Hours per day.....                  | 99  |
| Hours per week.....                 | 100 |
| Days per week.....                  | 100 |
| MD.....                             | 101 |
| Hours per day.....                  | 101 |
| Hours per week.....                 | 103 |
| Days per week.....                  | 104 |
| Mental health care - discharge..... | 106 |
| Replicated Effect.....              | 106 |
| Hours per day.....                  | 106 |
| Hours per week.....                 | 107 |
| Days per week.....                  | 107 |
| MD.....                             | 108 |

|                                 |     |
|---------------------------------|-----|
| Hours per day.....              | 108 |
| Hours per week.....             | 110 |
| Days per week.....              | 111 |
| Mental health care - year.....  | 113 |
| Replicated Effect.....          | 113 |
| Hours per day.....              | 113 |
| Hours per week.....             | 113 |
| Days per week.....              | 114 |
| MD.....                         | 115 |
| Hours per day.....              | 115 |
| Hours per week.....             | 116 |
| Days per week.....              | 118 |
| Mental health care - month..... | 120 |
| Replicated Effect.....          | 120 |
| Hours per day.....              | 120 |
| Hours per week.....             | 120 |
| Days per week.....              | 121 |
| MD.....                         | 122 |
| Hours per day.....              | 122 |
| Hours per week.....             | 123 |
| Days per week.....              | 125 |
| PTSD care - discharge.....      | 127 |
| Replicated Effect.....          | 127 |
| Hours per day.....              | 127 |
| Hours per week.....             | 127 |
| Days per week.....              | 128 |
| MD.....                         | 129 |
| Hours per day.....              | 129 |
| Hours per week.....             | 130 |
| Days per week.....              | 132 |
| PTSD care - year.....           | 134 |
| Replicated Effect.....          | 134 |
| Hours per day.....              | 134 |
| Hours per week.....             | 134 |

|                                  |     |
|----------------------------------|-----|
| Days per week.....               | 135 |
| MD.....                          | 136 |
| Hours per day.....               | 136 |
| Hours per week.....              | 137 |
| Days per week.....               | 139 |
| PTSD care - month.....           | 141 |
| Replicated Effect.....           | 141 |
| Hours per day.....               | 141 |
| Hours per week.....              | 141 |
| Days per week.....               | 142 |
| MD.....                          | 143 |
| Hours per day.....               | 143 |
| Hours per week.....              | 144 |
| Days per week.....               | 146 |
| Depression care - discharge..... | 148 |
| Replicated Effect.....           | 148 |
| Hours per day.....               | 148 |
| Hours per week.....              | 148 |
| Days per week.....               | 149 |
| MD.....                          | 150 |
| Hours per day.....               | 150 |
| Hours per week.....              | 151 |
| Days per week.....               | 153 |
| Depression care - year.....      | 155 |
| Replicated Effect.....           | 155 |
| Hours per day.....               | 155 |
| Hours per week.....              | 156 |
| Days per week.....               | 156 |
| MD.....                          | 157 |
| Hours per day.....               | 157 |
| Hours per week.....              | 159 |
| Days per week.....               | 160 |
| Depression care - month.....     | 162 |
| Replicated Effect.....           | 162 |

|                          |     |
|--------------------------|-----|
| Hours per day.....       | 162 |
| Hours per week.....      | 163 |
| Days per week.....       | 163 |
| MD.....                  | 164 |
| Hours per day.....       | 164 |
| Hours per week.....      | 166 |
| Days per week.....       | 167 |
| Any SUD - discharge..... | 169 |
| Replicated Effect.....   | 169 |
| Hours per day.....       | 169 |
| Hours per week.....      | 170 |
| Days per week.....       | 171 |
| MD.....                  | 171 |
| Hours per day.....       | 171 |
| Hours per week.....      | 173 |
| Days per week.....       | 175 |
| Any SUD - year.....      | 176 |
| Replicated Effect.....   | 176 |
| Hours per day.....       | 176 |
| Hours per week.....      | 177 |
| Days per week.....       | 178 |
| MD.....                  | 179 |
| Hours per day.....       | 179 |
| Hours per week.....      | 180 |
| Days per week.....       | 182 |
| Any SUD - month.....     | 184 |
| Replicated Effect.....   | 184 |
| Hours per day.....       | 184 |
| Hours per week.....      | 184 |
| Days per week.....       | 185 |
| MD.....                  | 185 |
| Hours per day.....       | 185 |
| Hours per week.....      | 187 |
| Days per week.....       | 188 |

|                                        |     |
|----------------------------------------|-----|
| AUD - discharge.....                   | 190 |
| Replicated Effect.....                 | 190 |
| Hours per day.....                     | 190 |
| Hours per week.....                    | 191 |
| Days per week.....                     | 192 |
| MD.....                                | 192 |
| Hours per day.....                     | 192 |
| Hours per week.....                    | 194 |
| Days per week.....                     | 195 |
| AUD - year.....                        | 197 |
| Replicated Effect.....                 | 197 |
| Hours per day.....                     | 197 |
| Hours per week.....                    | 198 |
| Days per week.....                     | 199 |
| MD.....                                | 199 |
| Hours per day.....                     | 199 |
| Hours per week.....                    | 201 |
| Days per week.....                     | 202 |
| AUD - month.....                       | 205 |
| Replicated Effect.....                 | 205 |
| Hours per day.....                     | 205 |
| Hours per week.....                    | 205 |
| Days per week.....                     | 205 |
| MD.....                                | 205 |
| Hours per day - CANNOT CALCULATE.....  | 205 |
| Hours per week - CANNOT CALCULATE..... | 205 |
| Days per week - CANNOT CALCULATE.....  | 205 |
| Cannabis - discharge.....              | 205 |
| Replicated Effect.....                 | 205 |
| Hours per day.....                     | 205 |
| Hours per week.....                    | 206 |
| Days per week.....                     | 207 |
| MD.....                                | 208 |
| Hours per day.....                     | 208 |



|                        |     |
|------------------------|-----|
| Hours per week.....    | 209 |
| Days per week.....     | 211 |
| Cannabis - year.....   | 212 |
| Replicated Effect..... | 212 |
| Hours per day.....     | 212 |
| Hours per week.....    | 213 |
| Days per week.....     | 214 |
| MD.....                | 215 |
| Hours per day.....     | 215 |
| Hours per week.....    | 216 |
| Days per week.....     | 218 |
| Cannabis - month.....  | 219 |
| Replicated Effect..... | 219 |
| Hours per day.....     | 219 |
| Hours per week.....    | 220 |
| Days per week.....     | 220 |
| MD.....                | 221 |
| Hours per day.....     | 221 |
| Hours per week.....    | 222 |
| Days per week.....     | 224 |

## Packages and Datasets

```
### Load "Read Excel Files" package
library(readxl)
```

```
### Load "Package for Analysis of Space-Time Ecological Series" package
library(pastecs)
```

```
### Load "Procedures for Psychological, Psychometric, and Personality
Research" package
library(psych)
```

```
### Load "Various R Programming Tools for Model Fitting" package
library(gmodels)
```

```
### Load "Support Functions and Datasets for Venables and Ripley's MASS"
package
```

```
library(MASS)
```

```
### Load "Functions that Apply to Rows and Columns of Matrices (and to  
Vectors)" package
```

```
library(matrixStats)
```

```
### Load "Meta-Analysis Package for R"
```

```
library(metafor)
```

```
### Load "General Package for Meta-Analysis"
```

```
library(meta)
```

```
### Upload data from Excel file
```

```
dboth <- read_excel("5. Grant - Veteran Video Game Behavioral Health  
Revision - Multimedia Appendix 5.xlsx")
```

```
#### Create Study 1 and Study 2 Datasets
```

```
ds1 <- subset(dboth, study == "1", select = age:vgdaysweek)
```

```
ds2 <- subset(dboth, study == "2", select = age:vgdaysweek)
```

```
#### Create Positive Screen Datasets
```

```
anyscreen_yes_ds1 <- subset(ds1, anyscreen == "1", select = c(vghrsday,  
vghrsweek, vgdaysweek))
```

```
anyscreen_no_ds1 <- subset(ds1, anyscreen == "0", select = c(vghrsday,  
vghrsweek, vgdaysweek))
```

```
anyscreen_yes_ds2 <- subset(ds2, anyscreen == "1", select = c(vghrsday,  
vghrsweek, vgdaysweek))
```

```
anyscreen_no_ds2 <- subset(ds2, anyscreen == "0", select = c(vghrsday,  
vghrsweek, vgdaysweek))
```

```
anymhscreen_yes_ds1 <- subset(ds1, anymhscreen == "1", select =  
c(vghrsday, vghrsweek, vgdaysweek))
```

```
anymhscreen_no_ds1 <- subset(ds1, anymhscreen == "0", select =  
c(vghrsday, vghrsweek, vgdaysweek))
```

```
anymhscreen_yes_ds2 <- subset(ds2, anymhscreen == "1", select =  
c(vghrsday, vghrsweek, vgdaysweek))
```

```
anymhscreen_no_ds2 <- subset(ds2, anymhscreen == "0", select =  
c(vghrsday, vghrsweek, vgdaysweek))
```

```
ptsd_yes_ds1 <- subset(ds1, ptsd == "1", select = c(vghrsday, vghrsweek,  
vgdaysweek))
```

```
ptsd_no_ds1 <- subset(ds1, ptsd == "0", select = c(vghrsday, vghrsweek,  
vgdaysweek))
```

```
ptsd_yes_ds2 <- subset(ds2, ptsd == "1", select = c(vghrsday, vghrsweek,  
vgdaysweek))
```

```
ptsd_no_ds2 <- subset(ds2, ptsd == "0", select = c(vghrsday, vghrsweek,  
vgdaysweek))
```

```
depression_yes_ds1 <- subset(ds1, depression == "1", select = c(vghrsday,  
vghrsweek, vgdaysweek))
```

```
depression_no_ds1 <- subset(ds1, depression == "0", select = c(vghrsday,  
vghrsweek, vgdaysweek))
```

```
depression_yes_ds2 <- subset(ds2, depression == "1", select = c(vghrsday,
```

```

vghrsweek, vgdaysweek))
depression_no_ds2 <- subset(ds2, depression == "0", select = c(vghrsday,
vghrsweek, vgdaysweek))
anysudscreen_yes_ds1 <- subset(ds1, anysudscreen == "1", select =
c(vghrsday, vghrsweek, vgdaysweek))
anysudscreen_no_ds1 <- subset(ds1, anysudscreen == "0", select =
c(vghrsday, vghrsweek, vgdaysweek))
anysudscreen_yes_ds2 <- subset(ds2, anysudscreen == "1", select =
c(vghrsday, vghrsweek, vgdaysweek))
anysudscreen_no_ds2 <- subset(ds2, anysudscreen == "0", select =
c(vghrsday, vghrsweek, vgdaysweek))
audit_yes_ds1 <- subset(ds1, audit == "1", select = c(vghrsday, vghrsweek,
vgdaysweek))
audit_no_ds1 <- subset(ds1, audit == "0", select = c(vghrsday, vghrsweek,
vgdaysweek))
audit_yes_ds2 <- subset(ds2, audit == "1", select = c(vghrsday, vghrsweek,
vgdaysweek))
audit_no_ds2 <- subset(ds2, audit == "0", select = c(vghrsday, vghrsweek,
vgdaysweek))
canscreen_yes_ds1 <- subset(ds1, canscreen == "1", select = c(vghrsday,
vghrsweek, vgdaysweek))
canscreen_no_ds1 <- subset(ds1, canscreen == "0", select = c(vghrsday,
vghrsweek, vgdaysweek))
canscreen_yes_ds2 <- subset(ds2, canscreen == "1", select = c(vghrsday,
vghrsweek, vgdaysweek))
canscreen_no_ds2 <- subset(ds2, canscreen == "0", select = c(vghrsday,
vghrsweek, vgdaysweek))

```

#### #### Create Study 1 Care Receipt Datasets

```

dslanyscreen <- subset(ds1, anyscreen == "1", select = age:vgdaysweek)
anycaredis_yes_ds1 <- subset(dslanyscreen, anydis == "1", select =
c(vghrsday, vghrsweek, vgdaysweek))
anycaredis_no_ds1 <- subset(dslanyscreen, anydis == "0", select =
c(vghrsday, vghrsweek, vgdaysweek))
anycareyear_yes_ds1 <- subset(dslanyscreen, anyyear == "1", select =
c(vghrsday, vghrsweek, vgdaysweek))
anycareyear_no_ds1 <- subset(dslanyscreen, anyyear == "0", select =
c(vghrsday, vghrsweek, vgdaysweek))
anycaremonth_yes_ds1 <- subset(dslanyscreen, anymonth == "1", select =
c(vghrsday, vghrsweek, vgdaysweek))
anycaremonth_no_ds1 <- subset(dslanyscreen, anymonth == "0", select =
c(vghrsday, vghrsweek, vgdaysweek))
dslanymhscreen <- subset(ds1, anymhscreen == "1", select =
age:vgdaysweek)
mhdis_yes_ds1 <- subset(dslanymhscreen, mhdis == "1", select =
c(vghrsday, vghrsweek, vgdaysweek))
mhdis_no_ds1 <- subset(dslanymhscreen, mhdis == "0", select =
c(vghrsday, vghrsweek, vgdaysweek))
mhyear_yes_ds1 <- subset(dslanymhscreen, mhyear == "1", select =
c(vghrsday, vghrsweek, vgdaysweek))

```

```
mhyear_no_ds1 <- subset(ds1anymhscreen, mhyear == "0", select =  
c(vghrsday, vghrsweek, vgdaysweek))  
mhmonth_yes_ds1 <- subset(ds1anymhscreen, mhmonth == "1", select =  
c(vghrsday, vghrsweek, vgdaysweek))  
mhmonth_no_ds1 <- subset(ds1anymhscreen, mhmonth == "0", select =  
c(vghrsday, vghrsweek, vgdaysweek))  
ds1ptsd <- subset(ds1, ptsd == "1", select = age:vgdaysweek)  
ptsddis_yes_ds1 <- subset(ds1ptsd, mhdis == "1", select = c(vghrsday,  
vghrsweek, vgdaysweek))  
ptsddis_no_ds1 <- subset(ds1ptsd, mhdis == "0", select = c(vghrsday,  
vghrsweek, vgdaysweek))  
ptsdyear_yes_ds1 <- subset(ds1ptsd, mhyear == "1", select = c(vghrsday,  
vghrsweek, vgdaysweek))  
ptsdyear_no_ds1 <- subset(ds1ptsd, mhyear == "0", select = c(vghrsday,  
vghrsweek, vgdaysweek))  
ptsdmonth_yes_ds1 <- subset(ds1ptsd, mhmonth == "1", select =  
c(vghrsday, vghrsweek, vgdaysweek))  
ptsdmonth_no_ds1 <- subset(ds1ptsd, mhmonth == "0", select =  
c(vghrsday, vghrsweek, vgdaysweek))  
ds1depression <- subset(ds1, depression == "1", select = age:vgdaysweek)  
depressiondis_yes_ds1 <- subset(ds1depression, mhdis == "1", select =  
c(vghrsday, vghrsweek, vgdaysweek))  
depressiondis_no_ds1 <- subset(ds1depression, mhdis == "0", select =  
c(vghrsday, vghrsweek, vgdaysweek))  
depressionyear_yes_ds1 <- subset(ds1depression, mhyear == "1", select =  
c(vghrsday, vghrsweek, vgdaysweek))  
depressionyear_no_ds1 <- subset(ds1depression, mhyear == "0", select =  
c(vghrsday, vghrsweek, vgdaysweek))  
depressionmonth_yes_ds1 <- subset(ds1depression, mhmonth == "1", select  
= c(vghrsday, vghrsweek, vgdaysweek))  
depressionmonth_no_ds1 <- subset(ds1depression, mhmonth == "0", select  
= c(vghrsday, vghrsweek, vgdaysweek))  
ds1anysudscreen <- subset(ds1, anysudscreen == "1", select =  
age:vgdaysweek)  
anysudscreenendis_yes_ds1 <- subset(ds1anysudscreen, alcsuddis == "1",  
select = c(vghrsday, vghrsweek, vgdaysweek))  
anysudscreenendis_no_ds1 <- subset(ds1anysudscreen, alcsuddis == "0",  
select = c(vghrsday, vghrsweek, vgdaysweek))  
anysudscreenyear_yes_ds1 <- subset(ds1anysudscreen, alcsudyear == "1",  
select = c(vghrsday, vghrsweek, vgdaysweek))  
anysudscreenyear_no_ds1 <- subset(ds1anysudscreen, alcsudyear == "0",  
select = c(vghrsday, vghrsweek, vgdaysweek))  
anysudscreenmonth_yes_ds1 <- subset(ds1anysudscreen, alcsudmonth ==  
"1", select = c(vghrsday, vghrsweek, vgdaysweek))  
anysudscreenmonth_no_ds1 <- subset(ds1anysudscreen, alcsudmonth ==  
"0", select = c(vghrsday, vghrsweek, vgdaysweek))  
ds1audit <- subset(ds1, audit == "1", select = age:vgdaysweek)  
auditdis_yes_ds1 <- subset(ds1audit, alcsuddis == "1", select = c(vghrsday,  
vghrsweek, vgdaysweek))  
auditdis_no_ds1 <- subset(ds1audit, alcsuddis == "0", select = c(vghrsday,
```

```

vghrsweek, vgdaysweek))
audityear_yes_ds1 <- subset(ds1audit, alcsudyear == "1", select =
c(vghrsday, vghrsweek, vgdaysweek))
audityear_no_ds1 <- subset(ds1audit, alcsudyear == "0", select =
c(vghrsday, vghrsweek, vgdaysweek))
auditmonth_yes_ds1 <- subset(ds1audit, alcsudmonth == "1", select =
c(vghrsday, vghrsweek, vgdaysweek))
auditmonth_no_ds1 <- subset(ds1audit, alcsudmonth == "0", select =
c(vghrsday, vghrsweek, vgdaysweek))
ds1canscreen <- subset(ds1, canscreen == "1", select = age:vgdaysweek)
cannabisdis_yes_ds1 <- subset(ds1canscreen, alcsuddis == "1", select =
c(vghrsday, vghrsweek, vgdaysweek))
cannabisdis_no_ds1 <- subset(ds1canscreen, alcsuddis == "0", select =
c(vghrsday, vghrsweek, vgdaysweek))
cannabisyear_yes_ds1 <- subset(ds1canscreen, alcsudyear == "1", select =
c(vghrsday, vghrsweek, vgdaysweek))
cannabisyear_no_ds1 <- subset(ds1canscreen, alcsudyear == "0", select =
c(vghrsday, vghrsweek, vgdaysweek))
cannabismonth_yes_ds1 <- subset(ds1canscreen, alcsudmonth == "1",
select = c(vghrsday, vghrsweek, vgdaysweek))
cannabismonth_no_ds1 <- subset(ds1canscreen, alcsudmonth == "0", select
= c(vghrsday, vghrsweek, vgdaysweek))

```

#### #### Create Study 2 Care Receipt Datasets

```

ds2anyscreen <- subset(ds2, anyscreen == "1", select = age:vgdaysweek)
anycaredis_yes_ds2 <- subset(ds2anyscreen, anydis == "1", select =
c(vghrsday, vghrsweek, vgdaysweek))
anycaredis_no_ds2 <- subset(ds2anyscreen, anydis == "0", select =
c(vghrsday, vghrsweek, vgdaysweek))
anycareyear_yes_ds2 <- subset(ds2anyscreen, anyyear == "1", select =
c(vghrsday, vghrsweek, vgdaysweek))
anycareyear_no_ds2 <- subset(ds2anyscreen, anyyear == "0", select =
c(vghrsday, vghrsweek, vgdaysweek))
anycaremonth_yes_ds2 <- subset(ds2anyscreen, anymonth == "1", select =
c(vghrsday, vghrsweek, vgdaysweek))
anycaremonth_no_ds2 <- subset(ds2anyscreen, anymonth == "0", select =
c(vghrsday, vghrsweek, vgdaysweek))
ds2anymhscreen <- subset(ds2, anymhscreen == "1", select =
age:vgdaysweek)
mhdis_yes_ds2 <- subset(ds2anymhscreen, mhdis == "1", select =
c(vghrsday, vghrsweek, vgdaysweek))
mhdis_no_ds2 <- subset(ds2anymhscreen, mhdis == "0", select =
c(vghrsday, vghrsweek, vgdaysweek))
mhyear_yes_ds2 <- subset(ds2anymhscreen, mhyear == "1", select =
c(vghrsday, vghrsweek, vgdaysweek))
mhyear_no_ds2 <- subset(ds2anymhscreen, mhyear == "0", select =
c(vghrsday, vghrsweek, vgdaysweek))
mhmonth_yes_ds2 <- subset(ds2anymhscreen, mhmonth == "1", select =
c(vghrsday, vghrsweek, vgdaysweek))
mhmonth_no_ds2 <- subset(ds2anymhscreen, mhmonth == "0", select =

```

```
c(vghrsday, vghrsweek, vgdaysweek))
ds2ptsd <- subset(ds2, ptsd == "1", select = age:vgdaysweek)
ptsddis_yes_ds2 <- subset(ds2ptsd, mhdis == "1", select = c(vghrsday,
vghrsweek, vgdaysweek))
ptsddis_no_ds2 <- subset(ds2ptsd, mhdis == "0", select = c(vghrsday,
vghrsweek, vgdaysweek))
ptsdyear_yes_ds2 <- subset(ds2ptsd, mhyear == "1", select = c(vghrsday,
vghrsweek, vgdaysweek))
ptsdyear_no_ds2 <- subset(ds2ptsd, mhyear == "0", select = c(vghrsday,
vghrsweek, vgdaysweek))
ptsdmonth_yes_ds2 <- subset(ds2ptsd, mhmonth == "1", select =
c(vghrsday, vghrsweek, vgdaysweek))
ptsdmonth_no_ds2 <- subset(ds2ptsd, mhmonth == "0", select =
c(vghrsday, vghrsweek, vgdaysweek))
ds2depression <- subset(ds2, depression == "1", select = age:vgdaysweek)
depressiondis_yes_ds2 <- subset(ds2depression, mhdis == "1", select =
c(vghrsday, vghrsweek, vgdaysweek))
depressiondis_no_ds2 <- subset(ds2depression, mhdis == "0", select =
c(vghrsday, vghrsweek, vgdaysweek))
depressionyear_yes_ds2 <- subset(ds2depression, mhyear == "1", select =
c(vghrsday, vghrsweek, vgdaysweek))
depressionyear_no_ds2 <- subset(ds2depression, mhyear == "0", select =
c(vghrsday, vghrsweek, vgdaysweek))
depressionmonth_yes_ds2 <- subset(ds2depression, mhmonth == "1", select
= c(vghrsday, vghrsweek, vgdaysweek))
depressionmonth_no_ds2 <- subset(ds2depression, mhmonth == "0", select
= c(vghrsday, vghrsweek, vgdaysweek))
ds2anysudscreen <- subset(ds2, anysudscreen == "1", select =
age:vgdaysweek)
anysudscreendis_yes_ds2 <- subset(ds2anysudscreen, alcsuddis == "1",
select = c(vghrsday, vghrsweek, vgdaysweek))
anysudscreendis_no_ds2 <- subset(ds2anysudscreen, alcsuddis == "0",
select = c(vghrsday, vghrsweek, vgdaysweek))
anysudscreenyear_yes_ds2 <- subset(ds2anysudscreen, alcsudyear == "1",
select = c(vghrsday, vghrsweek, vgdaysweek))
anysudscreenyear_no_ds2 <- subset(ds2anysudscreen, alcsudyear == "0",
select = c(vghrsday, vghrsweek, vgdaysweek))
anysudscreenmonth_yes_ds2 <- subset(ds2anysudscreen, alcsudmonth ==
"1", select = c(vghrsday, vghrsweek, vgdaysweek))
anysudscreenmonth_no_ds2 <- subset(ds2anysudscreen, alcsudmonth ==
"0", select = c(vghrsday, vghrsweek, vgdaysweek))
ds2audit <- subset(ds2, audit == "1", select = age:vgdaysweek)
auditdis_yes_ds2 <- subset(ds2audit, alcsuddis == "1", select = c(vghrsday,
vghrsweek, vgdaysweek))
auditdis_no_ds2 <- subset(ds2audit, alcsuddis == "0", select = c(vghrsday,
vghrsweek, vgdaysweek))
audityear_yes_ds2 <- subset(ds2audit, alcsudyear == "1", select =
c(vghrsday, vghrsweek, vgdaysweek))
audityear_no_ds2 <- subset(ds2audit, alcsudyear == "0", select =
c(vghrsday, vghrsweek, vgdaysweek))
```

```

auditmonth_yes_ds2 <- subset(ds2audit, alcsudmonth == "1", select =
c(vghrsday, vghrsweek, vgdaysweek))
auditmonth_no_ds2 <- subset(ds2audit, alcsudmonth == "0", select =
c(vghrsday, vghrsweek, vgdaysweek))
ds2canscreen <- subset(ds2, canscreen == "1", select = age:vgdaysweek)
cannabisdis_yes_ds2 <- subset(ds2canscreen, alcsuddis == "1", select =
c(vghrsday, vghrsweek, vgdaysweek))
cannabisdis_no_ds2 <- subset(ds2canscreen, alcsuddis == "0", select =
c(vghrsday, vghrsweek, vgdaysweek))
cannabisyear_yes_ds2 <- subset(ds2canscreen, alcsudyear == "1", select =
c(vghrsday, vghrsweek, vgdaysweek))
cannabisyear_no_ds2 <- subset(ds2canscreen, alcsudyear == "0", select =
c(vghrsday, vghrsweek, vgdaysweek))
cannabismonth_yes_ds2 <- subset(ds2canscreen, alcsudmonth == "1",
select = c(vghrsday, vghrsweek, vgdaysweek))
cannabismonth_no_ds2 <- subset(ds2canscreen, alcsudmonth == "0", select
= c(vghrsday, vghrsweek, vgdaysweek))

```

## Demographics

### Age

#### # Study 1

```

ds1_age <- subset(ds1, select = c(age))
ds1_age <- data.frame(mean = apply(ds1_age, 2, mean), sd =
apply(ds1_age, 2, sd), n = colSums(!is.na(ds1_age)))

```

#### # Study 2

```

ds2_age <- subset(ds2, select = c(age))
ds2_age <- data.frame(mean = apply(ds2_age, 2, mean), sd =
apply(ds2_age, 2, sd), n = colSums(!is.na(ds2_age)))

```

#### # Combined

```

dboth_age <- rbind(ds1_age, ds2_age)
rownames(dboth_age) <- c("Study 1", "Study 2")
dboth_age

```

```

##      mean    sd  n
## Study 1 28.35714 3.364383 350
## Study 2 28.72680 3.418982 582

```

#### # Welch Two Sample t-test

```
(diff_age <- t.test(age ~ study, data=dboth))
```

```

##
## Welch Two Sample t-test
##
## data: age by study
## t = -1.6145, df = 744.59, p-value = 0.1068
## alternative hypothesis: true difference in means is not equal to 0

```

```
## 95 percent confidence interval:
## -0.81915586 0.07983332
## sample estimates:
## mean in group 1 mean in group 2
##      28.35714      28.72680
```

## Gender

```
# Percentages
```

```
attach(dboth)
dboth_gender <- table(study,gender)
colnames(dboth_gender) <- c("Female", "Male")
prop.table(dboth_gender, 1)
```

```
##      gender
## study  Female   Male
##    1 0.07449857 0.92550143
##    2 0.13230241 0.86769759
```

```
# Sample Sizes
```

```
margin.table(dboth_gender, 1)
```

```
## study
##    1  2
## 349 582
```

```
# Chi-squared test
```

```
chisq.test(dboth_gender)
```

```
##
## Pearson's Chi-squared test with Yates' continuity correction
##
## data: dboth_gender
## X-squared = 6.8329, df = 1, p-value = 0.008949
```

## Hispanic ethnicity

```
# Percentages
```

```
attach(dboth)
dboth_hispanic <- table(study,hispanic)
colnames(dboth_hispanic) <- c("No", "Yes")
prop.table(dboth_hispanic, 1)
```

```
##      hispanic
## study      No      Yes
##    1 0.7936963 0.2063037
##    2 0.8969072 0.1030928
```



### # Sample Sizes

```
margin.table(dboth_hispanic, 1)
```

```
## study  
## 1 2  
## 349 582
```

### # Chi-squared test

```
chisq.test(dboth_hispanic)
```

```
##  
## Pearson's Chi-squared test with Yates' continuity correction  
##  
## data: dboth_hispanic  
## X-squared = 18.261, df = 1, p-value = 1.926e-05
```

## Race

### # Percentages

```
attach(dboth)
```

```
dboth_race <- table(study,racew)
```

```
colnames(dboth_race) <- c("Non-White", "White")
```

```
prop.table(dboth_race, 1)
```

```
## racew  
## study Non-White White  
## 1 0.2200000 0.7800000  
## 2 0.1426117 0.8573883
```

### # Sample Sizes

```
margin.table(dboth_race, 1)
```

```
## study  
## 1 2  
## 350 582
```

### # Chi-squared test

```
chisq.test(dboth_race)
```

```
##  
## Pearson's Chi-squared test with Yates' continuity correction  
##  
## data: dboth_race  
## X-squared = 8.6688, df = 1, p-value = 0.003237
```

## Highest education level

### # Percentages

```
attach(dboth)
```

```
dboth_education <- table(study,educationc)
```

```

colnames(dboth_education) <- c("Not College Graduate", "College Graduate")
prop.table(dboth_education, 1)

##      educationc
## study Not College Graduate College Graduate
##    1      0.8171429      0.1828571
##    2      0.8006873      0.1993127

# Sample Sizes
margin.table(dboth_education, 1)

## study
##    1  2
## 350 582

# Chi-squared test
chisq.test(dboth_education)

##
## Pearson's Chi-squared test with Yates' continuity correction
##
## data: dboth_education
## X-squared = 0.28153, df = 1, p-value = 0.5957

```

## Currently in college

```

# Percentages
attach(dboth)
dboth_college <- table(study,collegeyes)
colnames(dboth_college) <- c("Not in College", "In College")
prop.table(dboth_college, 1)

##      collegeyes
## study Not in College In College
##    1      0.5342857 0.4657143
##    2      0.6563574 0.3436426

# Sample Sizes
margin.table(dboth_college, 1)

## study
##    1  2
## 350 582

# Chi-squared test
chisq.test(dboth_college)

##
## Pearson's Chi-squared test with Yates' continuity correction
##

```

```
## data: dboth_college
## X-squared = 13.188, df = 1, p-value = 0.0002817
```

## Annual household income

```
# Percentages
```

```
attach(dboth)
dboth_income <- table(study,income)
colnames(dboth_income) <- c("Less than $10,000", "$10,000 to $14,999",
"$15,000 to $24,999", "$25,000 to $49,999", "$50,000 to $99,999",
"$100,000 to $149,999", "$150,000 to $199,999", "$200,000 or more")
prop.table(dboth_income, 1)
```

```
##      income
## study Less than $10,000 $10,000 to $14,999 $15,000 to $24,999
##    1      0.082857143      0.082857143      0.200000000
##    2      0.054982818      0.079037801      0.154639175
##      income
## study $25,000 to $49,999 $50,000 to $99,999 $100,000 to $149,999
##    1      0.345714286      0.240000000      0.040000000
##    2      0.408934708      0.243986254      0.048109966
##      income
## study $150,000 to $199,999 $200,000 or more
##    1      0.008571429      0.000000000
##    2      0.008591065      0.001718213
```

```
# Sample Sizes
```

```
margin.table(dboth_income, 1)
```

```
## study
##    1  2
## 350 582
```

```
# Chi-squared test
```

```
chisq.test(dboth_income)
```

```
##
## Pearson's Chi-squared test
##
## data: dboth_income
## X-squared = 8.4563, df = 7, p-value = 0.2941
```

## Marital status

```
# Percentages
```

```
attach(dboth)
dboth_married <- table(study,married)
colnames(dboth_married) <- c("Not Married", "Married")
prop.table(dboth_married, 1)
```

```

##    married
## study Not Married  Married
##    1  0.4685714 0.5314286
##    2  0.5223368 0.4776632

# Sample Sizes
margin.table(dboth_married, 1)

## study
##  1  2
## 350 582

# Chi-squared test
chisq.test(dboth_married)

##
## Pearson's Chi-squared test with Yates' continuity correction
##
## data:  dboth_married
## X-squared = 2.3168, df = 1, p-value = 0.128

```

## Children

```

# Study 1
ds1_children <- subset(ds1, select = c(children))
ds1_children <- data.frame(mean = apply(ds1_children, 2, mean), sd =
  apply(ds1_children, 2, sd), n = colSums(!is.na(ds1_children)))

# Study 2
ds2_children <- subset(ds2, select = c(children))
ds2_children <- data.frame(mean = apply(ds2_children, 2, mean), sd =
  apply(ds2_children, 2, sd), n = colSums(!is.na(ds2_children)))

# Combined
dboth_children <- rbind(ds1_children, ds2_children)
rownames(dboth_children) <- c("Study 1", "Study 2")
dboth_children

##          mean      sd  n
## Study 1 1.425714 1.463568 350
## Study 2 1.281787 1.420157 582

# Welch Two Sample t-test
(diff_children <- t.test(children ~ study, data=dboth))

##
## Welch Two Sample t-test
##
## data:  children by study
## t = 1.4701, df = 717.87, p-value = 0.142

```

```
## alternative hypothesis: true difference in means is not equal to 0
## 95 percent confidence interval:
## -0.04828768 0.33614236
## sample estimates:
## mean in group 1 mean in group 2
##      1.425714      1.281787
```

## Children living at home

### # Study 1

```
ds1_childrenhome <- subset(ds1, select = c(childrenathome))
ds1_childrenhome <- na.omit(ds1_childrenhome)
ds1_childrenhome <- data.frame(mean = apply(ds1_childrenhome, 2, mean),
sd = apply(ds1_childrenhome, 2, sd), n = colSums(!is.na(ds1_childrenhome)))
```

### # Study 2

```
ds2_childrenhome <- subset(ds2, select = c(childrenathome))
ds2_childrenhome <- na.omit(ds2_childrenhome)
ds2_childrenhome <- data.frame(mean = apply(ds2_childrenhome, 2, mean),
sd = apply(ds2_childrenhome, 2, sd), n = colSums(!is.na(ds2_childrenhome)))
```

### # Combined

```
dboth_childrenhome <- rbind(ds1_childrenhome, ds2_childrenhome)
rownames(dboth_childrenhome) <- c("Study 1", "Study 2")
dboth_childrenhome
```

```
##      mean      sd      n
## Study 1 1.715596 1.136668 218
## Study 2 1.738506 1.273996 348
```

### # Welch Two Sample t-test

```
(diff_childrenhome <- t.test(childrenathome ~ study, data=dboth))
```

```
##
## Welch Two Sample t-test
##
## data: childrenathome by study
## t = -0.22261, df = 499.48, p-value = 0.8239
## alternative hypothesis: true difference in means is not equal to 0
## 95 percent confidence interval:
## -0.2251010 0.1792822
## sample estimates:
## mean in group 1 mean in group 2
##      1.715596      1.738506
```

## Military branch

### # Percentages

```
attach(dboth)
dboth_branch <- table(study,branch)
colnames(dboth_branch) <- c("Air Force", "Army", "Marine Corps", "Navy")
prop.table(dboth_branch, 1)
```

```
##   branch
## study Air Force   Army Marine Corps   Navy
##   1 0.06285714 0.61428571 0.24857143 0.07428571
##   2 0.09793814 0.59793814 0.22164948 0.08247423
```

### # Sample Sizes

```
margin.table(dboth_branch, 1)
```

```
## study
##   1  2
## 350 582
```

### # Chi-squared test

```
chisq.test(dboth_branch)
```

```
##
## Pearson's Chi-squared test
##
## data: dboth_branch
## X-squared = 4.1381, df = 3, p-value = 0.2469
```

## Behavioral Health

### PTSD

#### # Percentages

```
attach(dboth)
dboth_ptsd <- table(study,ptsd)
colnames(dboth_ptsd) <- c("No", "Yes")
prop.table(dboth_ptsd, 1)
```

```
##   ptsd
## study   No   Yes
##   1 0.5657143 0.4342857
##   2 0.6099656 0.3900344
```

#### # Sample Sizes

```
margin.table(dboth_ptsd, 1)
```

```
## study
##   1  2
## 350 582
```

```
# Chi-squared test  
chisq.test(dboth_ptsd)
```

```
##  
## Pearson's Chi-squared test with Yates' continuity correction  
##  
## data: dboth_ptsd  
## X-squared = 1.5951, df = 1, p-value = 0.2066
```

## Depression

```
# Percentages  
attach(dboth)  
dboth_depression <- table(study,depression)  
colnames(dboth_depression) <- c("No", "Yes")  
prop.table(dboth_depression, 1)
```

```
##      depression  
## study      No      Yes  
##    1 0.5171429 0.4828571  
##    2 0.5343643 0.4656357
```

```
# Sample Sizes  
margin.table(dboth_depression, 1)
```

```
## study  
##    1  2  
## 350 582
```

```
# Chi-squared test  
chisq.test(dboth_depression)
```

```
##  
## Pearson's Chi-squared test with Yates' continuity correction  
##  
## data: dboth_depression  
## X-squared = 0.19558, df = 1, p-value = 0.6583
```

## AUDIT

```
# Percentages  
attach(dboth)  
dboth_audit <- table(study,audit)  
colnames(dboth_audit) <- c("No", "Yes")  
prop.table(dboth_audit, 1)
```

```
##      audit  
## study      No      Yes
```

```
## 1 0.5685714 0.4314286
## 2 0.7010309 0.2989691
```

### *# Sample Sizes*

```
margin.table(dboth_audit, 1)
```

```
## study
## 1 2
## 350 582
```

### *# Chi-squared test*

```
chisq.test(dboth_audit)
```

```
##
## Pearson's Chi-squared test with Yates' continuity correction
##
## data: dboth_audit
## X-squared = 16.307, df = 1, p-value = 5.387e-05
```

## Total drinking days

### *# Study 1*

```
ds1_totdrinkdays <- subset(ds1, select = c(totdrinkdays))
ds1_totdrinkdays <- na.omit(ds1_totdrinkdays)
ds1_totdrinkdays <- data.frame(mean = apply(ds1_totdrinkdays, 2, mean),
sd = apply(ds1_totdrinkdays, 2, sd), n = colSums(!is.na(ds1_totdrinkdays)))
```

### *# Study 2*

```
ds2_totdrinkdays <- subset(ds2, select = c(totdrinkdays))
ds2_totdrinkdays <- na.omit(ds2_totdrinkdays)
ds2_totdrinkdays <- data.frame(mean = apply(ds2_totdrinkdays, 2, mean),
sd = apply(ds2_totdrinkdays, 2, sd), n = colSums(!is.na(ds2_totdrinkdays)))
```

### *# Combined*

```
dboth_totdrinkdays <- rbind(ds1_totdrinkdays, ds2_totdrinkdays)
rownames(dboth_totdrinkdays) <- c("Study 1", "Study 2")
dboth_totdrinkdays
```

```
##      mean      sd  n
## Study 1 10.43714 9.070579 350
## Study 2 12.39175 8.752347 582
```

### *# Welch Two Sample t-test*

```
(dboth_totdrinkdays <- t.test(totdrinkdays ~ study, data=dboth))
```

```
##
## Welch Two Sample t-test
##
## data: totdrinkdays by study
## t = -3.2278, df = 714.65, p-value = 0.001304
```



```
## alternative hypothesis: true difference in means is not equal to 0
## 95 percent confidence interval:
## -3.1434843 -0.7657351
## sample estimates:
## mean in group 1 mean in group 2
##      10.43714      12.39175
```

## Drinks per drinking day

### # Study 1

```
ds1_avgdrinksday <- subset(ds1, select = c(avgdrinksday))
ds1_avgdrinksday <- na.omit(ds1_avgdrinksday)
ds1_avgdrinksday <- data.frame(mean = apply(ds1_avgdrinksday, 2, mean),
sd = apply(ds1_avgdrinksday, 2, sd), n = colSums(!is.na(ds1_avgdrinksday)))
```

### # Study 2

```
ds2_avgdrinksday <- subset(ds2, select = c(avgdrinksday))
ds2_avgdrinksday <- na.omit(ds2_avgdrinksday)
ds2_avgdrinksday <- data.frame(mean = apply(ds2_avgdrinksday, 2, mean),
sd = apply(ds2_avgdrinksday, 2, sd), n = colSums(!is.na(ds2_avgdrinksday)))
```

### # Combined

```
dboth_avgdrinksday <- rbind(ds1_avgdrinksday, ds2_avgdrinksday)
rownames(dboth_avgdrinksday) <- c("Study 1", "Study 2")
dboth_avgdrinksday
```

```
##      mean      sd      n
## Study 1 4.818182 4.252064 319
## Study 2 4.738977 3.285413 567
```

### # Welch Two Sample t-test

```
(dboth_avgdrinksday <- t.test(avgdrinksday ~ study, data=dboth))
```

```
##
## Welch Two Sample t-test
##
## data: avgdrinksday by study
## t = 0.28785, df = 533.67, p-value = 0.7736
## alternative hypothesis: true difference in means is not equal to 0
## 95 percent confidence interval:
## -0.4613290 0.6197385
## sample estimates:
## mean in group 1 mean in group 2
##      4.818182      4.738977
```

## Heavy drinking occasions

### # Study 1

```
ds1_heavydrink <- subset(ds1, select = c(heavydrink))
ds1_heavydrink <- na.omit(ds1_heavydrink)
ds1_heavydrink <- data.frame(mean = apply(ds1_heavydrink, 2, mean), sd =
apply(ds1_heavydrink, 2, sd), n = colSums(!is.na(ds1_heavydrink)))
```

### # Study 2

```
ds2_heavydrink <- subset(ds2, select = c(heavydrink))
ds2_heavydrink <- na.omit(ds2_heavydrink)
ds2_heavydrink <- data.frame(mean = apply(ds2_heavydrink, 2, mean), sd =
apply(ds2_heavydrink, 2, sd), n = colSums(!is.na(ds2_heavydrink)))
```

### # Combined

```
dboth_heavydrink <- rbind(ds1_heavydrink, ds2_heavydrink)
rownames(dboth_heavydrink) <- c("Study 1", "Study 2")
dboth_heavydrink
```

```
##          mean    sd  n
## Study 1 4.637500 6.192307 320
## Study 2 5.784832 7.160422 567
```

### # Welch Two Sample t-test

```
(dboth_heavydrink <- t.test(heavydrink ~ study, data=dboth))
```

```
##
## Welch Two Sample t-test
##
## data: heavydrink by study
## t = -2.5022, df = 743.49, p-value = 0.01256
## alternative hypothesis: true difference in means is not equal to 0
## 95 percent confidence interval:
## -2.0475076 -0.2471573
## sample estimates:
## mean in group 1 mean in group 2
##      4.637500      5.784832
```

## Peak drinks on a drinking day

### # Study 1

```
ds1_peakdrink <- subset(ds1, select = c(peakdrink))
ds1_peakdrink <- na.omit(ds1_peakdrink)
ds1_peakdrink <- data.frame(mean = apply(ds1_peakdrink, 2, mean), sd =
apply(ds1_peakdrink, 2, sd), n = colSums(!is.na(ds1_peakdrink)))
```

### # Study 2

```
ds2_peakdrink <- subset(ds2, select = c(peakdrink))
ds2_peakdrink <- na.omit(ds2_peakdrink)
ds2_peakdrink <- data.frame(mean = apply(ds2_peakdrink, 2, mean), sd =
```

```
apply(ds2_peakdrink, 2, sd), n = colSums(!is.na(ds2_peakdrink)))
```

```
# Combined
```

```
dboth_peakdrink <- rbind(ds1_peakdrink, ds2_peakdrink)  
rownames(dboth_peakdrink) <- c("Study 1", "Study 2")  
dboth_peakdrink
```

```
##          mean    sd  n  
## Study 1 8.479495 5.955828 317  
## Study 2 9.389771 6.044719 567
```

```
# Welch Two Sample t-test
```

```
(dboth_peakdrink <- t.test(peakdrink ~ study, data=dboth))
```

```
##  
## Welch Two Sample t-test  
##  
## data: peakdrink by study  
## t = -2.1677, df = 662.16, p-value = 0.03054  
## alternative hypothesis: true difference in means is not equal to 0  
## 95 percent confidence interval:  
## -1.73482915 -0.08572176  
## sample estimates:  
## mean in group 1 mean in group 2  
##      8.479495      9.389771
```

## Alcohol consequences

```
# Study 1
```

```
ds1_BYAACQ <- subset(ds1, select = c(BYAACQ))  
ds1_BYAACQ <- na.omit(ds1_BYAACQ)  
ds1_BYAACQ <- data.frame(mean = apply(ds1_BYAACQ, 2, mean), sd =  
apply(ds1_BYAACQ, 2, sd), n = colSums(!is.na(ds1_BYAACQ)))
```

```
# Study 2
```

```
ds2_BYAACQ <- subset(ds2, select = c(BYAACQ))  
ds2_BYAACQ <- na.omit(ds2_BYAACQ)  
ds2_BYAACQ <- data.frame(mean = apply(ds2_BYAACQ, 2, mean), sd =  
apply(ds2_BYAACQ, 2, sd), n = colSums(!is.na(ds2_BYAACQ)))
```

```
# Combined
```

```
dboth_BYAACQ <- rbind(ds1_BYAACQ, ds2_BYAACQ)  
rownames(dboth_BYAACQ) <- c("Study 1", "Study 2")  
dboth_BYAACQ
```

```
##          mean    sd  n  
## Study 1 7.818750 7.128355 320  
## Study 2 7.546392 6.790731 582
```

```

# Welch Two Sample t-test
(dboth_BYAACQ <- t.test(BYAACQ ~ study, data=dboth))

##
## Welch Two Sample t-test
##
## data: BYAACQ by study
## t = 0.55825, df = 630.57, p-value = 0.5769
## alternative hypothesis: true difference in means is not equal to 0
## 95 percent confidence interval:
## -0.6857055 1.2304220
## sample estimates:
## mean in group 1 mean in group 2
## 7.818750 7.546392

```

## Any cannabis use in past 6 months

```

# Percentages
attach(dbboth)
dboth_anycannabis <- table(study,anycannabis)
colnames(dboth_anycannabis) <- c("No", "Yes")
prop.table(dboth_anycannabis, 1)

```

```

## anycannabis
## study No Yes
## 1 0.5810277 0.4189723
## 2 0.7096220 0.2903780

```

```

# Sample Sizes
margin.table(dboth_anycannabis, 1)

```

```

## study
## 1 2
## 253 582

```

```

# Chi-squared test
chisq.test(dboth_anycannabis)

```

```

##
## Pearson's Chi-squared test with Yates' continuity correction
##
## data: dboth_anycannabis
## X-squared = 12.627, df = 1, p-value = 0.0003803

```

## Total cannabis use days in past 30 days

```

# Study 1
ds1_totcannabis <- subset(ds1, select = c(totcannabis))
ds1_totcannabis <- na.omit(ds1_totcannabis)

```

```
ds1_totcannabis <- data.frame(mean = apply(ds1_totcannabis, 2, mean), sd
= apply(ds1_totcannabis, 2, sd), n = colSums(!is.na(ds1_totcannabis)))
```

### *# Study 2*

```
ds2_totcannabis <- subset(ds2, select = c(totcannabis))
ds2_totcannabis <- na.omit(ds2_totcannabis)
ds2_totcannabis <- data.frame(mean = apply(ds2_totcannabis, 2, mean), sd
= apply(ds2_totcannabis, 2, sd), n = colSums(!is.na(ds2_totcannabis)))
```

### *# Combined*

```
dboth_totcannabis <- rbind(ds1_totcannabis, ds2_totcannabis)
rownames(dboth_totcannabis) <- c("Study 1", "Study 2")
dboth_totcannabis
```

```
##      mean      sd  n
## Study 1 9.872093 11.428341 86
## Study 2 3.347079  8.584288 582
```

### *# Welch Two Sample t-test*

```
(dboth_totcannabis <- t.test(totcannabis ~ study, data=dboth))
```

```
##
## Welch Two Sample t-test
##
## data: totcannabis by study
## t = 5.087, df = 99.663, p-value = 1.713e-06
## alternative hypothesis: true difference in means is not equal to 0
## 95 percent confidence interval:
##  3.980082 9.069946
## sample estimates:
## mean in group 1 mean in group 2
##      9.872093      3.347079
```

## Care Receipt

### Behavioral Health - Discharge

#### *# Percentages*

```
attach(dboth)
dboth_anydis <- table(study,anydis)
colnames(dboth_anydis) <- c("No", "Yes")
prop.table(dboth_anydis, 1)
```

```
##      anydis
## study    No    Yes
##    1 0.4771429 0.5228571
##    2 0.4192440 0.5807560
```

### *# Sample Sizes*

```
margin.table(dboth_anydis, 1)
```

```
## study  
## 1 2  
## 350 582
```

### *# Chi-squared test*

```
chisq.test(dboth_anydis)
```

```
##  
## Pearson's Chi-squared test with Yates' continuity correction  
##  
## data: dboth_anydis  
## X-squared = 2.7419, df = 1, p-value = 0.09775
```

## Behavioral Health - Year

### *# Percentages*

```
attach(dboth)  
dboth_anyyear <- table(study,anyyear)  
colnames(dboth_anyyear) <- c("No", "Yes")  
prop.table(dboth_anyyear, 1)
```

```
## anyyear  
## study No Yes  
## 1 0.6600000 0.3400000  
## 2 0.5910653 0.4089347
```

### *# Sample Sizes*

```
margin.table(dboth_anyyear, 1)
```

```
## study  
## 1 2  
## 350 582
```

### *# Chi-squared test*

```
chisq.test(dboth_anyyear)
```

```
##  
## Pearson's Chi-squared test with Yates' continuity correction  
##  
## data: dboth_anyyear  
## X-squared = 4.108, df = 1, p-value = 0.04268
```

## Behavioral Health - Month

### *# Percentages*

```
attach(dboth)  
dboth_anymonth <- table(study,anymonth)
```

```

colnames(dboth_anymonth) <- c("No", "Yes")
prop.table(dboth_anymonth, 1)

##   anymonth
## study    No    Yes
##   1 0.8800000 0.1200000
##   2 0.8264605 0.1735395

# Sample Sizes
margin.table(dboth_anymonth, 1)

## study
##   1 2
## 350 582

# Chi-squared test
chisq.test(dboth_anymonth)

##
## Pearson's Chi-squared test with Yates' continuity correction
##
## data:  dboth_anymonth
## X-squared = 4.4199, df = 1, p-value = 0.03552

```

## Mental Health - Discharge

```

# Percentages
attach(dboth)
dboth_mhdis <- table(study,mhdis)
colnames(dboth_mhdis) <- c("No", "Yes")
prop.table(dboth_mhdis, 1)

##   mhdis
## study    No    Yes
##   1 0.5000000 0.5000000
##   2 0.4501718 0.5498282

# Sample Sizes
margin.table(dboth_mhdis, 1)

## study
##   1 2
## 350 582

# Chi-squared test
chisq.test(dboth_mhdis)

##
## Pearson's Chi-squared test with Yates' continuity correction
##

```

```
## data: dboth_mhdis
## X-squared = 1.9836, df = 1, p-value = 0.159
```

## Mental Health - Year

### # Percentages

```
attach(dboth)
dboth_mhyear <- table(study,mhyear)
colnames(dboth_mhyear) <- c("No", "Yes")
prop.table(dboth_mhyear, 1)
```

```
##   mhyear
## study   No   Yes
##   1 0.6685714 0.3314286
##   2 0.6082474 0.3917526
```

### # Sample Sizes

```
margin.table(dboth_mhyear, 1)
```

```
## study
##   1  2
## 350 582
```

### # Chi-squared test

```
chisq.test(dboth_mhyear)
```

```
##
## Pearson's Chi-squared test with Yates' continuity correction
##
## data: dboth_mhyear
## X-squared = 3.1613, df = 1, p-value = 0.0754
```

## Mental Health - Month

### # Percentages

```
attach(dboth)
dboth_mhmonth <- table(study,mhmonth)
colnames(dboth_mhmonth) <- c("No", "Yes")
prop.table(dboth_mhmonth, 1)
```

```
##   mhmonth
## study   No   Yes
##   1 0.8800000 0.1200000
##   2 0.8316151 0.1683849
```

### # Sample Sizes

```
margin.table(dboth_mhmonth, 1)
```



```
## study
## 1 2
## 350 582

# Chi-squared test
chisq.test(dboth_mhmonth)

##
## Pearson's Chi-squared test with Yates' continuity correction
##
## data: dboth_mhmonth
## X-squared = 3.6383, df = 1, p-value = 0.05646
```

## Substance Use - Discharge

```
# Percentages
attach(dboth)
dboth_alcsuddis <- table(study,alcsuddis)
colnames(dboth_alcsuddis) <- c("No", "Yes")
prop.table(dboth_alcsuddis, 1)
```

```
##   alcsuddis
## study   No   Yes
##   1 0.8085714 0.1914286
##   2 0.7920962 0.2079038
```

```
# Sample Sizes
margin.table(dboth_alcsuddis, 1)
```

```
## study
## 1 2
## 350 582
```

```
# Chi-squared test
chisq.test(dboth_alcsuddis)

##
## Pearson's Chi-squared test with Yates' continuity correction
##
## data: dboth_alcsuddis
## X-squared = 0.27321, df = 1, p-value = 0.6012
```

## Substance Use - Year

```
# Percentages
attach(dboth)
dboth_alcsudyear <- table(study,alcsudyear)
colnames(dboth_alcsudyear) <- c("No", "Yes")
prop.table(dboth_alcsudyear, 1)
```

```
##   alcsudyear
## study      No      Yes
##   1 0.91142857 0.08857143
##   2 0.88659794 0.11340206
```

### # Sample Sizes

```
margin.table(dboth_alcsudyear, 1)
```

```
## study
##   1  2
## 350 582
```

### # Chi-squared test

```
chisq.test(dboth_alcsudyear)
```

```
##
## Pearson's Chi-squared test with Yates' continuity correction
##
## data: dboth_alcsudyear
## X-squared = 1.1912, df = 1, p-value = 0.2751
```

## Substance Use - Month

### # Percentages

```
attach(dboth)
dboth_alcsudmonth <- table(study,alcsudmonth)
colnames(dboth_alcsudmonth) <- c("No", "Yes")
prop.table(dboth_alcsudmonth, 1)
```

```
##   alcsudmonth
## study      No      Yes
##   1 0.997142857 0.002857143
##   2 0.969072165 0.030927835
```

### # Sample Sizes

```
margin.table(dboth_alcsudmonth, 1)
```

```
## study
##   1  2
## 350 582
```

### # Chi-squared test

```
chisq.test(dboth_alcsudmonth)
```

```
##
## Pearson's Chi-squared test with Yates' continuity correction
##
## data: dboth_alcsudmonth
## X-squared = 7.2753, df = 1, p-value = 0.006991
```

## Video Game Behavior

### Total hours spent playing per day

```
# Study 1
ds1_vghrsday <- subset(ds1, select = c(vghrsday))
ds1_vghrsday <- na.omit(ds1_vghrsday)
ds1_vghrsday <- data.frame(mean = apply(ds1_vghrsday, 2, mean), sd =
apply(ds1_vghrsday, 2, sd), n = colSums(!is.na(ds1_vghrsday)))
```

```
# Study 2
ds2_vghrsday <- subset(ds2, select = c(vghrsday))
ds2_vghrsday <- na.omit(ds2_vghrsday)
ds2_vghrsday <- data.frame(mean = apply(ds2_vghrsday, 2, mean), sd =
apply(ds2_vghrsday, 2, sd), n = colSums(!is.na(ds2_vghrsday)))
```

```
# Combined
dboth_vghrsday <- rbind(ds1_vghrsday, ds2_vghrsday)
rownames(dboth_vghrsday) <- c("Study 1", "Study 2")
dboth_vghrsday
```

```
##          mean    sd  n
## Study 1 2.311429 1.80659 350
## Study 2 3.541237 3.24939 582
```

```
# Welch Two Sample t-test
(dboth_vghrsday <- t.test(vghrsday ~ study, data=dboth))
```

```
##
## Welch Two Sample t-test
##
## data: vghrsday by study
## t = -7.4205, df = 924.95, p-value = 2.641e-13
## alternative hypothesis: true difference in means is not equal to 0
## 95 percent confidence interval:
## -1.5550615 -0.9045556
## sample estimates:
## mean in group 1 mean in group 2
##      2.311429      3.541237
```

### Total hours spent playing per week

```
# Study 1
ds1_vghrsweek <- subset(ds1, select = c(vghrsweek))
ds1_vghrsweek <- na.omit(ds1_vghrsweek)
ds1_vghrsweek <- data.frame(mean = apply(ds1_vghrsweek, 2, mean), sd =
apply(ds1_vghrsweek, 2, sd), n = colSums(!is.na(ds1_vghrsweek)))
```

```
# Study 2
```

```
ds2_vghrsweek <- subset(ds2, select = c(vghrsweek))
ds2_vghrsweek <- na.omit(ds2_vghrsweek)
ds2_vghrsweek <- data.frame(mean = apply(ds2_vghrsweek, 2, mean), sd =
apply(ds2_vghrsweek, 2, sd), n = colSums(!is.na(ds2_vghrsweek)))
```

#### *# Combined*

```
dboth_vghrsweek <- rbind(ds1_vghrsweek, ds2_vghrsweek)
rownames(dboth_vghrsweek) <- c("Study 1", "Study 2")
dboth_vghrsweek
```

```
##          mean      sd  n
## Study 1 12.80857 13.50625 350
## Study 2 18.36426 21.89675 582
```

#### *# Welch Two Sample t-test*

```
(dboth_vghrsweek <- t.test(vghrsweek ~ study, data=dboth))
```

```
##
## Welch Two Sample t-test
##
## data: vghrsweek by study
## t = -4.7904, df = 929.41, p-value = 1.936e-06
## alternative hypothesis: true difference in means is not equal to 0
## 95 percent confidence interval:
## -7.831726 -3.279654
## sample estimates:
## mean in group 1 mean in group 2
##      12.80857      18.36426
```

## Total days spent playing per week

### *# Study 1*

```
ds1_vgdaysweek <- subset(ds1, select = c(vgdaysweek))
ds1_vgdaysweek <- na.omit(ds1_vgdaysweek)
ds1_vgdaysweek <- data.frame(mean = apply(ds1_vgdaysweek, 2, mean), sd =
= apply(ds1_vgdaysweek, 2, sd), n = colSums(!is.na(ds1_vgdaysweek)))
```

### *# Study 2*

```
ds2_vgdaysweek <- subset(ds2, select = c(vgdaysweek))
ds2_vgdaysweek <- na.omit(ds2_vgdaysweek)
ds2_vgdaysweek <- data.frame(mean = apply(ds2_vgdaysweek, 2, mean), sd =
= apply(ds2_vgdaysweek, 2, sd), n = colSums(!is.na(ds2_vgdaysweek)))
```

### *# Combined*

```
dboth_vgdaysweek <- rbind(ds1_vgdaysweek, ds2_vgdaysweek)
rownames(dboth_vgdaysweek) <- c("Study 1", "Study 2")
dboth_vgdaysweek
```

```

##          mean    sd    n
## Study 1 5.028571 2.283436 350
## Study 2 4.723368 2.214202 582

# Welch Two Sample t-test
(dboth_vgdaysweek <- t.test(vgdaysweek ~ study, data=dboth))

##
## Welch Two Sample t-test
##
## data:  vgdaysweek by study
## t = 1.9985, df = 717.48, p-value = 0.04603
## alternative hypothesis: true difference in means is not equal to 0
## 95 percent confidence interval:
##  0.005386123 0.605021339
## sample estimates:
## mean in group 1 mean in group 2
##      5.028571      4.723368

```

## Any positive screen

### Replicated Effect

#### Hours per day

##### Study 1

```

(vghrsday_anyscreen_ds1 <- t.test(vghrsday ~ anyscreen, data=ds1))

##
## Welch Two Sample t-test
##
## data:  vghrsday by anyscreen
## t = -1.1898, df = 137.56, p-value = 0.2362
## alternative hypothesis: true difference in means is not equal to 0
## 95 percent confidence interval:
## -0.7367650 0.1832053
## sample estimates:
## mean in group 0 mean in group 1
##      2.103448      2.380228

```

##### Study 2

```

(vghrsday_anyscreen_ds2 <- t.test(vghrsday ~ anyscreen, data=ds2))

##
## Welch Two Sample t-test
##

```

```
## data: vghrsday by anyscreen
## t = -1.3004, df = 260.62, p-value = 0.1946
## alternative hypothesis: true difference in means is not equal to 0
## 95 percent confidence interval:
## -0.947307 0.193740
## sample estimates:
## mean in group 0 mean in group 1
## 3.251852 3.628635
```

## Hours per week

### Study 1

```
(vghrsweek_anscreen_ds1 <- t.test(vghrsweek ~ anyscreen, data=ds1))
```

```
##
## Welch Two Sample t-test
##
## data: vghrsweek by anyscreen
## t = -1.4503, df = 142.17, p-value = 0.1492
## alternative hypothesis: true difference in means is not equal to 0
## 95 percent confidence interval:
## -5.8319900 0.8959295
## sample estimates:
## mean in group 0 mean in group 1
## 10.95402 13.42205
```

### Study 2

```
(vghrsweek_anscreen_ds2 <- t.test(vghrsweek ~ anyscreen, data=ds2))
```

```
##
## Welch Two Sample t-test
##
## data: vghrsweek by anyscreen
## t = -1.4505, df = 270.15, p-value = 0.1481
## alternative hypothesis: true difference in means is not equal to 0
## 95 percent confidence interval:
## -6.5517454 0.9931076
## sample estimates:
## mean in group 0 mean in group 1
## 16.22963 19.00895
```

## Days per week

### Study 1

```
(vgdaysweek_anscreen_ds1 <- t.test(vgdaysweek ~ anyscreen, data=ds1))
```

```
##
## Welch Two Sample t-test
##
## data: vgdaysweek by anyscreen
## t = -1.799, df = 137.54, p-value = 0.07421
## alternative hypothesis: true difference in means is not equal to 0
## 95 percent confidence interval:
## -1.10732457 0.05230076
## sample estimates:
## mean in group 0 mean in group 1
##      4.632184      5.159696
```

## Study 2

```
(vgdaysweek_anscreen_ds2 <- t.test(vgdaysweek ~ anyscreen, data=ds2))
```

```
##
## Welch Two Sample t-test
##
## data: vgdaysweek by anyscreen
## t = -0.90454, df = 216.96, p-value = 0.3667
## alternative hypothesis: true difference in means is not equal to 0
## 95 percent confidence interval:
## -0.6332657 0.2348565
## sample estimates:
## mean in group 0 mean in group 1
##      4.570370      4.769575
```

## MD

### Hours per day

```
#Study 1
anscreen_yes_ds1_vghrsday <- subset(anscreen_yes_ds1, select =
c(vghrsday)) #Subset 1i data
anscreen_vghrsday_m1i <- apply(anscreen_yes_ds1_vghrsday, 2, mean)
#Calculate m1i
anscreen_vghrsday_sd1i <- apply(anscreen_yes_ds1_vghrsday, 2, sd)
#Calculate sd1i
anscreen_vghrsday_n1i <- colSums(!is.na(anscreen_yes_ds1_vghrsday))
#Calculate n1i
anscreen_no_ds1_vghrsday <- subset(anscreen_no_ds1, select =
c(vghrsday)) #Subset 2i data
anscreen_vghrsday_m2i <- apply(anscreen_no_ds1_vghrsday, 2, mean)
#Calculate m2i
anscreen_vghrsday_sd2i <- apply(anscreen_no_ds1_vghrsday, 2, sd)
#Calculate sd2i
anscreen_vghrsday_n2i <- colSums(!is.na(anscreen_no_ds1_vghrsday))
```

```

#Calculate n2i
ds1anyscreen_meta <- data.frame(m1i = anyscreen_vghrsday_m1i, sd1i =
anyscreen_vghrsday_sd1i, n1i = anyscreen_vghrsday_n1i, m2i =
anyscreen_vghrsday_m2i, sd2i = anyscreen_vghrsday_sd2i, n2i =
anyscreen_vghrsday_n2i) #MA dataframe
ds1anyscreen_meta <- escalc(measure="MD", m1i = m1i, sd1i = sd1i, n1i =
n1i, m2i = m2i, sd2i = sd2i, n2i = n2i, data=ds1anyscreen_meta) #Calculate
yi and vi

```

```

#Study 2
anyscreen_yes_ds2_vghrsday <- subset(anyscreen_yes_ds2, select =
c(vghrsday)) #Subset 1i data
anyscreen_vghrsday_m1i <- apply(anyscreen_yes_ds2_vghrsday, 2, mean)
#Calculate m1i
anyscreen_vghrsday_sd1i <- apply(anyscreen_yes_ds2_vghrsday, 2, sd)
#Calculate sd1i
anyscreen_vghrsday_n1i <- colSums(!is.na(anyscreen_yes_ds2_vghrsday))
#Calculate n1i
anyscreen_no_ds2_vghrsday <- subset(anyscreen_no_ds2, select =
c(vghrsday)) #Subset 2i data
anyscreen_vghrsday_m2i <- apply(anyscreen_no_ds2_vghrsday, 2, mean)
#Calculate m2i
anyscreen_vghrsday_sd2i <- apply(anyscreen_no_ds2_vghrsday, 2, sd)
#Calculate sd2i
anyscreen_vghrsday_n2i <- colSums(!is.na(anyscreen_no_ds2_vghrsday))
#Calculate n2i
ds2anyscreen_meta <- data.frame(m1i = anyscreen_vghrsday_m1i, sd1i =
anyscreen_vghrsday_sd1i, n1i = anyscreen_vghrsday_n1i, m2i =
anyscreen_vghrsday_m2i, sd2i = anyscreen_vghrsday_sd2i, n2i =
anyscreen_vghrsday_n2i) #MA dataframe
ds2anyscreen_meta <- escalc(measure="MD", m1i = m1i, sd1i = sd1i, n1i =
n1i, m2i = m2i, sd2i = sd2i, n2i = n2i, data=ds2anyscreen_meta) #Calculate
yi and vi

```

```

#FE meta-analysis
(anyscreen_meta <- rbind(ds1anyscreen_meta, ds2anyscreen_meta))

```

```

##      m1i  sd1i n1i  m2i  sd2i n2i  yi  vi
## 1 2.380228 1.766932 263 2.103448 1.917086 87 0.2768 0.0541
## 2 3.628635 3.368395 447 3.251852 2.811805 135 0.3768 0.0839

```

```

(any_vghrsday_meta <- rma(yi=yi, vi=vi, measure="MD", method="FE",
data=anyscreen_meta))

```

```

##
## Fixed-Effects Model (k = 2)
##
## Test for Heterogeneity:
## Q(df = 1) = 0.0724, p-val = 0.7878
##
## Model Results:

```



```
##
## estimate    se    zval    pval    ci.lb    ci.ub
## 0.3160 0.1814 1.7419 0.0815 -0.0395 0.6715
##
## ---
## Signif. codes: 0 '***' 0.001 '**' 0.01 '*' 0.05 '.' 0.1 ' ' 1
```

## Hours per week

```
#Study 1
anyscreen_yes_ds1_vghrsweek <- subset(anyscreen_yes_ds1, select =
c(vghrsweek)) #Subset 1i data
anyscreen_vghrsweek_m1i <- apply(anyscreen_yes_ds1_vghrsweek, 2, mean)
#Calculate m1i
anyscreen_vghrsweek_sd1i <- apply(anyscreen_yes_ds1_vghrsweek, 2, sd)
#Calculate sd1i
anyscreen_vghrsweek_n1i <- colSums(!is.na(anyscreen_yes_ds1_vghrsweek))
#Calculate n1i
anyscreen_no_ds1_vghrsweek <- subset(anyscreen_no_ds1, select =
c(vghrsweek)) #Subset 2i data
anyscreen_vghrsweek_m2i <- apply(anyscreen_no_ds1_vghrsweek, 2, mean)
#Calculate m2i
anyscreen_vghrsweek_sd2i <- apply(anyscreen_no_ds1_vghrsweek, 2, sd)
#Calculate sd2i
anyscreen_vghrsweek_n2i <- colSums(!is.na(anyscreen_no_ds1_vghrsweek))
#Calculate n2i
ds1anyscreen_meta <- data.frame(m1i = anyscreen_vghrsweek_m1i, sd1i =
anyscreen_vghrsweek_sd1i, n1i = anyscreen_vghrsweek_n1i, m2i =
anyscreen_vghrsweek_m2i, sd2i = anyscreen_vghrsweek_sd2i, n2i =
anyscreen_vghrsweek_n2i) #MA dataframe
ds1anyscreen_meta <- escalc(measure="MD", m1i = m1i, sd1i = sd1i, n1i =
n1i, m2i = m2i, sd2i = sd2i, n2i = n2i, data=ds1anyscreen_meta) #Calculate
yi and vi

#Study 2
anyscreen_yes_ds2_vghrsweek <- subset(anyscreen_yes_ds2, select =
c(vghrsweek)) #Subset 1i data
anyscreen_vghrsweek_m1i <- apply(anyscreen_yes_ds2_vghrsweek, 2, mean)
#Calculate m1i
anyscreen_vghrsweek_sd1i <- apply(anyscreen_yes_ds2_vghrsweek, 2, sd)
#Calculate sd1i
anyscreen_vghrsweek_n1i <- colSums(!is.na(anyscreen_yes_ds2_vghrsweek))
#Calculate n1i
anyscreen_no_ds2_vghrsweek <- subset(anyscreen_no_ds2, select =
c(vghrsweek)) #Subset 2i data
anyscreen_vghrsweek_m2i <- apply(anyscreen_no_ds2_vghrsweek, 2, mean)
#Calculate m2i
anyscreen_vghrsweek_sd2i <- apply(anyscreen_no_ds2_vghrsweek, 2, sd)
#Calculate sd2i
```

```

anyscreen_vghrsweek_n2i <- colSums(!is.na(anyscreen_no_ds2_vghrsweek))
#Calculate n2i
ds2anyscreen_meta <- data.frame(m1i = anyscreen_vghrsweek_m1i, sd1i =
anyscreen_vghrsweek_sd1i, n1i = anyscreen_vghrsweek_n1i, m2i =
anyscreen_vghrsweek_m2i, sd2i = anyscreen_vghrsweek_sd2i, n2i =
anyscreen_vghrsweek_n2i) #MA dataframe
ds2anyscreen_meta <- escalc(measure="MD", m1i = m1i, sd1i = sd1i, n1i =
n1i, m2i = m2i, sd2i = sd2i, n2i = n2i, data=ds2anyscreen_meta) #Calculate
yi and vi

#FE meta-analysis
(anyscreen_meta <- rbind(ds1anyscreen_meta, ds2anyscreen_meta))

##      m1i  sd1i n1i  m2i  sd2i n2i  yi  vi
## 1 13.42205 13.34598 263 10.95402 13.89320 87 2.4680 2.8959
## 2 19.00895 22.82925 447 16.22963 18.39165 135 2.7793 3.6715

(any_vghrsweek_meta <- rma(yi=yi, vi=vi, measure="MD", method="FE",
data=anyscreen_meta))

##
## Fixed-Effects Model (k = 2)
##
## Test for Heterogeneity:
## Q(df = 1) = 0.0148, p-val = 0.9033
##
## Model Results:
##
## estimate    se    zval    pval  ci.lb  ci.ub
## 2.6053  1.2724  2.0476  0.0406  0.1115  5.0991  *
##
## ---
## Signif. codes:  0 '***' 0.001 '**' 0.01 '*' 0.05 '.' 0.1 ' ' 1

```

## Days per week

```

#Study 1
anyscreen_yes_ds1_vgdaysweek <- subset(anyscreen_yes_ds1, select =
c(vgdaysweek)) #Subset 1i data
anyscreen_vgdaysweek_m1i <- apply(anyscreen_yes_ds1_vgdaysweek, 2,
mean) #Calculate m1i
anyscreen_vgdaysweek_sd1i <- apply(anyscreen_yes_ds1_vgdaysweek, 2,
sd) #Calculate sd1i
anyscreen_vgdaysweek_n1i <- colSums(!
is.na(anyscreen_yes_ds1_vgdaysweek)) #Calculate n1i
anyscreen_no_ds1_vgdaysweek <- subset(anyscreen_no_ds1, select =
c(vgdaysweek)) #Subset 2i data
anyscreen_vgdaysweek_m2i <- apply(anyscreen_no_ds1_vgdaysweek, 2,
mean) #Calculate m2i
anyscreen_vgdaysweek_sd2i <- apply(anyscreen_no_ds1_vgdaysweek, 2, sd)

```

```

#Calculate sd2i
anyscreen_vgdaysweek_n2i <- colSums(!
is.na(anyscreen_no_ds1_vgdaysweek)) #Calculate n2i
ds1anyscreen_meta <- data.frame(m1i = anyscreen_vgdaysweek_m1i, sd1i =
anyscreen_vgdaysweek_sd1i, n1i = anyscreen_vgdaysweek_n1i, m2i =
anyscreen_vgdaysweek_m2i, sd2i = anyscreen_vgdaysweek_sd2i, n2i =
anyscreen_vgdaysweek_n2i) #MA dataframe
ds1anyscreen_meta <- escalc(measure="MD", m1i = m1i, sd1i = sd1i, n1i =
n1i, m2i = m2i, sd2i = sd2i, n2i = n2i, data=ds1anyscreen_meta) #Calculate
yi and vi

```

### #Study 2

```

anyscreen_yes_ds2_vgdaysweek <- subset(anyscreen_yes_ds2, select =
c(vgdaysweek)) #Subset 1i data
anyscreen_vgdaysweek_m1i <- apply(anyscreen_yes_ds2_vgdaysweek, 2,
mean) #Calculate m1i
anyscreen_vgdaysweek_sd1i <- apply(anyscreen_yes_ds2_vgdaysweek, 2,
sd) #Calculate sd1i
anyscreen_vgdaysweek_n1i <- colSums(!
is.na(anyscreen_yes_ds2_vgdaysweek)) #Calculate n1i
anyscreen_no_ds2_vgdaysweek <- subset(anyscreen_no_ds2, select =
c(vgdaysweek)) #Subset 2i data
anyscreen_vgdaysweek_m2i <- apply(anyscreen_no_ds2_vgdaysweek, 2,
mean) #Calculate m2i
anyscreen_vgdaysweek_sd2i <- apply(anyscreen_no_ds2_vgdaysweek, 2, sd)
#Calculate sd2i
anyscreen_vgdaysweek_n2i <- colSums(!
is.na(anyscreen_no_ds2_vgdaysweek)) #Calculate n2i
ds2anyscreen_meta <- data.frame(m1i = anyscreen_vgdaysweek_m1i, sd1i =
anyscreen_vgdaysweek_sd1i, n1i = anyscreen_vgdaysweek_n1i, m2i =
anyscreen_vgdaysweek_m2i, sd2i = anyscreen_vgdaysweek_sd2i, n2i =
anyscreen_vgdaysweek_n2i) #MA dataframe
ds2anyscreen_meta <- escalc(measure="MD", m1i = m1i, sd1i = sd1i, n1i =
n1i, m2i = m2i, sd2i = sd2i, n2i = n2i, data=ds2anyscreen_meta) #Calculate
yi and vi

```

### #FE meta-analysis

```

(anyscreen_meta <- rbind(ds1anyscreen_meta, ds2anyscreen_meta))

```

```

##      m1i  sd1i n1i  m2i  sd2i n2i  yi  vi
## 1 5.159696 2.226911 263 4.632184 2.416585 87 0.5275 0.0860
## 2 4.769575 2.202356 447 4.570370 2.254484 135 0.1992 0.0485

```

```

(any_vgdaysweek_meta <- rma(yi=yi, vi=vi, measure="MD", method="FE",
data=anyscreen_meta))

```

```

##
## Fixed-Effects Model (k = 2)
##
## Test for Heterogeneity:
## Q(df = 1) = 0.8015, p-val = 0.3706

```

```
##
## Model Results:
##
## estimate    se    zval    pval  ci.lb  ci.ub
## 0.3176 0.1761 1.8036 0.0713 -0.0275 0.6627
##
## ---
## Signif. codes: 0 '***' 0.001 '**' 0.01 '*' 0.05 '.' 0.1 ' ' 1
```

## Any mental health screen

### Replicated Effect

#### Hours per day

##### Study 1

```
(vghrsday_anymhscreen_ds1 <- t.test(vghrsday ~ anymhscreen, data=ds1))
```

```
##
## Welch Two Sample t-test
##
## data: vghrsday by anymhscreen
## t = -2.9955, df = 324.01, p-value = 0.002951
## alternative hypothesis: true difference in means is not equal to 0
## 95 percent confidence interval:
## -0.9548135 -0.1978231
## sample estimates:
## mean in group 0 mean in group 1
## 2.033149 2.609467
```

##### Study 2

```
(vghrsday_anymhscreen_ds2 <- t.test(vghrsday ~ anymhscreen, data=ds2))
```

```
##
## Welch Two Sample t-test
##
## data: vghrsday by anymhscreen
## t = -2.5118, df = 577.59, p-value = 0.01228
## alternative hypothesis: true difference in means is not equal to 0
## 95 percent confidence interval:
## -1.1973751 -0.1465138
## sample estimates:
## mean in group 0 mean in group 1
## 3.197183 3.869128
```

## Hours per week

### Study 1

```
(vghrsweek_anymhscreen_ds1 <- t.test(vghrsweek ~ anymhscreen,  
data=ds1))
```

```
##  
## Welch Two Sample t-test  
##  
## data: vghrsweek by anymhscreen  
## t = -3.1385, df = 320.04, p-value = 0.001856  
## alternative hypothesis: true difference in means is not equal to 0  
## 95 percent confidence interval:  
## -7.340716 -1.683639  
## sample estimates:  
## mean in group 0 mean in group 1  
## 10.62983 15.14201
```

### Study 2

```
(vghrsweek_anymhscreen_ds2 <- t.test(vghrsweek ~ anymhscreen,  
data=ds2))
```

```
##  
## Welch Two Sample t-test  
##  
## data: vghrsweek by anymhscreen  
## t = -2.8329, df = 570.62, p-value = 0.004776  
## alternative hypothesis: true difference in means is not equal to 0  
## 95 percent confidence interval:  
## -8.622322 -1.561581  
## sample estimates:  
## mean in group 0 mean in group 1  
## 15.75704 20.84899
```

## Days per week

### Study 1

```
(vgdaysweek_anymhscreen_ds1 <- t.test(vgdaysweek ~ anymhscreen,  
data=ds1))
```

```
##  
## Welch Two Sample t-test  
##  
## data: vgdaysweek by anymhscreen  
## t = -2.2251, df = 347.68, p-value = 0.02672
```

```
## alternative hypothesis: true difference in means is not equal to 0
## 95 percent confidence interval:
## -1.01682148 -0.06265154
## sample estimates:
## mean in group 0 mean in group 1
##      4.767956      5.307692
```

## Study 2

```
(vgdaysweek_anymhscreen_ds2 <- t.test(vgdaysweek ~ anymhscreen,
data=ds2))
```

```
##
## Welch Two Sample t-test
##
## data: vgdaysweek by anymhscreen
## t = -1.8544, df = 577.07, p-value = 0.0642
## alternative hypothesis: true difference in means is not equal to 0
## 95 percent confidence interval:
## -0.70004822 0.02011627
## sample estimates:
## mean in group 0 mean in group 1
##      4.549296      4.889262
```

## MD

### Hours per day

#### *#Study 1*

```
anymhscreen_yes_ds1_vghrsday <- subset(anymhscreen_yes_ds1, select =
c(vghrsday)) #Subset 1i data
anymhscreen_vghrsday_m1i <- apply(anymhscreen_yes_ds1_vghrsday, 2,
mean) #Calculate m1i
anymhscreen_vghrsday_sd1i <- apply(anymhscreen_yes_ds1_vghrsday, 2,
sd) #Calculate sd1i
anymhscreen_vghrsday_n1i <- colSums(!
is.na(anymhscreen_yes_ds1_vghrsday)) #Calculate n1i
anymhscreen_no_ds1_vghrsday <- subset(anymhscreen_no_ds1, select =
c(vghrsday)) #Subset 2i data
anymhscreen_vghrsday_m2i <- apply(anymhscreen_no_ds1_vghrsday, 2,
mean) #Calculate m2i
anymhscreen_vghrsday_sd2i <- apply(anymhscreen_no_ds1_vghrsday, 2, sd)
#Calculate sd2i
anymhscreen_vghrsday_n2i <- colSums(!
is.na(anymhscreen_no_ds1_vghrsday)) #Calculate n2i
ds1anymhscreen_meta <- data.frame(m1i = anymhscreen_vghrsday_m1i,
sd1i = anymhscreen_vghrsday_sd1i, n1i = anymhscreen_vghrsday_n1i, m2i
= anymhscreen_vghrsday_m2i, sd2i = anymhscreen_vghrsday_sd2i, n2i =
```

```

anymhscreen_vghrsday_n2i) #MA dataframe
ds1anymhscreen_meta <- escalc(measure="MD", m1i = m1i, sd1i = sd1i, n1i
= n1i, m2i = m2i, sd2i = sd2i, n2i = n2i, data=ds1anymhscreen_meta)
#Calculate yi and vi

```

```

#Study 2

```

```

anymhscreen_yes_ds2_vghrsday <- subset(anymhscreen_yes_ds2, select =
c(vghrsday)) #Subset 1i data
anymhscreen_vghrsday_m1i <- apply(anymhscreen_yes_ds2_vghrsday, 2,
mean) #Calculate m1i
anymhscreen_vghrsday_sd1i <- apply(anymhscreen_yes_ds2_vghrsday, 2,
sd) #Calculate sd1i
anymhscreen_vghrsday_n1i <- colSums(!
is.na(anymhscreen_yes_ds2_vghrsday)) #Calculate n1i
anymhscreen_no_ds2_vghrsday <- subset(anymhscreen_no_ds2, select =
c(vghrsday)) #Subset 2i data
anymhscreen_vghrsday_m2i <- apply(anymhscreen_no_ds2_vghrsday, 2,
mean) #Calculate m2i
anymhscreen_vghrsday_sd2i <- apply(anymhscreen_no_ds2_vghrsday, 2, sd)
#Calculate sd2i
anymhscreen_vghrsday_n2i <- colSums(!
is.na(anymhscreen_no_ds2_vghrsday)) #Calculate n2i
ds2anymhscreen_meta <- data.frame(m1i = anymhscreen_vghrsday_m1i,
sd1i = anymhscreen_vghrsday_sd1i, n1i = anymhscreen_vghrsday_n1i, m2i
= anymhscreen_vghrsday_m2i, sd2i = anymhscreen_vghrsday_sd2i, n2i =
anymhscreen_vghrsday_n2i) #MA dataframe
ds2anymhscreen_meta <- escalc(measure="MD", m1i = m1i, sd1i = sd1i, n1i
= n1i, m2i = m2i, sd2i = sd2i, n2i = n2i, data=ds2anymhscreen_meta)
#Calculate yi and vi

```

```

#FE meta-analysis

```

```

(anymhscreen_meta <- rbind(ds1anymhscreen_meta,
ds2anymhscreen_meta))

```

```

##      m1i sd1i n1i  m2i  sd2i n2i  yi  vi
## 1 2.609467 1.96733 169 2.033149 1.598265 181 0.5763 0.0370
## 2 3.869128 3.40721 298 3.197183 3.043244 284 0.6719 0.0716

```

```

(any_vghrsday_meta <- rma(yi=yi, vi=vi, measure="MD", method="FE",
data=anymhscreen_meta))

```

```

##

```

```

## Fixed-Effects Model (k = 2)

```

```

##

```

```

## Test for Heterogeneity:

```

```

## Q(df = 1) = 0.0842, p-val = 0.7717

```

```

##

```

```

## Model Results:

```

```

##

```

```

## estimate    se    zval    pval  ci.lb  ci.ub
## 0.6089 0.1562 3.8985 <.0001 0.3028 0.9151 ***

```

```
##
## ---
## Signif. codes:  0 '***' 0.001 '**' 0.01 '*' 0.05 '.' 0.1 ' ' 1
```

## Hours per week

### #Study 1

```
anymhscreen_yes_ds1_vghrsweek <- subset(anymhscreen_yes_ds1, select =
c(vghrsweek)) #Subset 1i data
anymhscreen_vghrsweek_m1i <- apply(anymhscreen_yes_ds1_vghrsweek, 2,
mean) #Calculate m1i
anymhscreen_vghrsweek_sd1i <- apply(anymhscreen_yes_ds1_vghrsweek, 2,
sd) #Calculate sd1i
anymhscreen_vghrsweek_n1i <- colSums(!
is.na(anymhscreen_yes_ds1_vghrsweek)) #Calculate n1i
anymhscreen_no_ds1_vghrsweek <- subset(anymhscreen_no_ds1, select =
c(vghrsweek)) #Subset 2i data
anymhscreen_vghrsweek_m2i <- apply(anymhscreen_no_ds1_vghrsweek, 2,
mean) #Calculate m2i
anymhscreen_vghrsweek_sd2i <- apply(anymhscreen_no_ds1_vghrsweek, 2,
sd) #Calculate sd2i
anymhscreen_vghrsweek_n2i <- colSums(!
is.na(anymhscreen_no_ds1_vghrsweek)) #Calculate n2i
ds1anymhscreen_meta <- data.frame(m1i = anymhscreen_vghrsweek_m1i,
sd1i = anymhscreen_vghrsweek_sd1i, n1i = anymhscreen_vghrsweek_n1i,
m2i = anymhscreen_vghrsweek_m2i, sd2i = anymhscreen_vghrsweek_sd2i,
n2i = anymhscreen_vghrsweek_n2i) #MA dataframe
ds1anymhscreen_meta <- escalc(measure="MD", m1i = m1i, sd1i = sd1i, n1i
= n1i, m2i = m2i, sd2i = sd2i, n2i = n2i, data=ds1anymhscreen_meta)
#Calculate yi and vi
```

### #Study 2

```
anymhscreen_yes_ds2_vghrsweek <- subset(anymhscreen_yes_ds2, select =
c(vghrsweek)) #Subset 1i data
anymhscreen_vghrsweek_m1i <- apply(anymhscreen_yes_ds2_vghrsweek, 2,
mean) #Calculate m1i
anymhscreen_vghrsweek_sd1i <- apply(anymhscreen_yes_ds2_vghrsweek, 2,
sd) #Calculate sd1i
anymhscreen_vghrsweek_n1i <- colSums(!
is.na(anymhscreen_yes_ds2_vghrsweek)) #Calculate n1i
anymhscreen_no_ds2_vghrsweek <- subset(anymhscreen_no_ds2, select =
c(vghrsweek)) #Subset 2i data
anymhscreen_vghrsweek_m2i <- apply(anymhscreen_no_ds2_vghrsweek, 2,
mean) #Calculate m2i
anymhscreen_vghrsweek_sd2i <- apply(anymhscreen_no_ds2_vghrsweek, 2,
sd) #Calculate sd2i
anymhscreen_vghrsweek_n2i <- colSums(!
is.na(anymhscreen_no_ds2_vghrsweek)) #Calculate n2i
ds2anymhscreen_meta <- data.frame(m1i = anymhscreen_vghrsweek_m1i,
```



```

sd1i = anymhscreen_vghrsweek_sd1i, n1i = anymhscreen_vghrsweek_n1i,
m2i = anymhscreen_vghrsweek_m2i, sd2i = anymhscreen_vghrsweek_sd2i,
n2i = anymhscreen_vghrsweek_n2i) #MA dataframe
ds2anymhscreen_meta <- escalc(measure="MD", m1i = m1i, sd1i = sd1i, n1i
= n1i, m2i = m2i, sd2i = sd2i, n2i = n2i, data=ds2anymhscreen_meta)
#Calculate yi and vi

#FE meta-analysis
(anymhscreen_meta <- rbind(ds1anymhscreen_meta,
ds2anymhscreen_meta))

##      m1i  sd1i n1i   m2i  sd2i n2i   yi   vi
## 1 15.14201 14.84014 169 10.62983 11.75826 181 4.5122 2.0670
## 2 20.84899 23.55195 298 15.75704 19.72033 284 5.0920 3.2307

(any_vghrsweek_meta <- rma(yi=yi, vi=vi, measure="MD", method="FE",
data=anymhscreen_meta))

##
## Fixed-Effects Model (k = 2)
##
## Test for Heterogeneity:
## Q(df = 1) = 0.0634, p-val = 0.8011
##
## Model Results:
##
## estimate      se    zval    pval  ci.lb  ci.ub
## 4.7384  1.1227  4.2204  <.0001  2.5379  6.9389   ***
##
## ---
## Signif. codes:  0 '***' 0.001 '**' 0.01 '*' 0.05 '.' 0.1 ' ' 1

```

## Days per week

```

#Study 1
anymhscreen_yes_ds1_vgdaysweek <- subset(anymhscreen_yes_ds1, select
= c(vgdaysweek)) #Subset 1i data
anymhscreen_vgdaysweek_m1i <- apply(anymhscreen_yes_ds1_vgdaysweek,
2, mean) #Calculate m1i
anymhscreen_vgdaysweek_sd1i <-
apply(anymhscreen_yes_ds1_vgdaysweek, 2, sd) #Calculate sd1i
anymhscreen_vgdaysweek_n1i <- colSums(!
is.na(anymhscreen_yes_ds1_vgdaysweek)) #Calculate n1i
anymhscreen_no_ds1_vgdaysweek <- subset(anymhscreen_no_ds1, select =
c(vgdaysweek)) #Subset 2i data
anymhscreen_vgdaysweek_m2i <- apply(anymhscreen_no_ds1_vgdaysweek,
2, mean) #Calculate m2i
anymhscreen_vgdaysweek_sd2i <- apply(anymhscreen_no_ds1_vgdaysweek,
2, sd) #Calculate sd2i
anymhscreen_vgdaysweek_n2i <- colSums(!

```

```

is.na(anymhscreen_no_ds1_vgdaysweek)) #Calculate n2i
ds1anymhscreen_meta <- data.frame(m1i = anymhscreen_vgdaysweek_m1i,
sd1i = anymhscreen_vgdaysweek_sd1i, n1i = anymhscreen_vgdaysweek_n1i,
m2i = anymhscreen_vgdaysweek_m2i, sd2i =
anymhscreen_vgdaysweek_sd2i, n2i = anymhscreen_vgdaysweek_n2i) #MA
dataframe
ds1anymhscreen_meta <- escalc(measure="MD", m1i = m1i, sd1i = sd1i, n1i
= n1i, m2i = m2i, sd2i = sd2i, n2i = n2i, data=ds1anymhscreen_meta)
#Calculate yi and vi

```

### #Study 2

```

anymhscreen_yes_ds2_vgdaysweek <- subset(anymhscreen_yes_ds2, select
= c(vgdaysweek)) #Subset 1i data
anymhscreen_vgdaysweek_m1i <- apply(anymhscreen_yes_ds2_vgdaysweek,
2, mean) #Calculate m1i
anymhscreen_vgdaysweek_sd1i <-
apply(anymhscreen_yes_ds2_vgdaysweek, 2, sd) #Calculate sd1i
anymhscreen_vgdaysweek_n1i <- colSums(!
is.na(anymhscreen_yes_ds2_vgdaysweek)) #Calculate n1i
anymhscreen_no_ds2_vgdaysweek <- subset(anymhscreen_no_ds2, select =
c(vgdaysweek)) #Subset 2i data
anymhscreen_vgdaysweek_m2i <- apply(anymhscreen_no_ds2_vgdaysweek,
2, mean) #Calculate m2i
anymhscreen_vgdaysweek_sd2i <- apply(anymhscreen_no_ds2_vgdaysweek,
2, sd) #Calculate sd2i
anymhscreen_vgdaysweek_n2i <- colSums(!
is.na(anymhscreen_no_ds2_vgdaysweek)) #Calculate n2i
ds2anymhscreen_meta <- data.frame(m1i = anymhscreen_vgdaysweek_m1i,
sd1i = anymhscreen_vgdaysweek_sd1i, n1i = anymhscreen_vgdaysweek_n1i,
m2i = anymhscreen_vgdaysweek_m2i, sd2i =
anymhscreen_vgdaysweek_sd2i, n2i = anymhscreen_vgdaysweek_n2i) #MA
dataframe
ds2anymhscreen_meta <- escalc(measure="MD", m1i = m1i, sd1i = sd1i, n1i
= n1i, m2i = m2i, sd2i = sd2i, n2i = n2i, data=ds2anymhscreen_meta)
#Calculate yi and vi

```

### #FE meta-analysis

```

(anymhscreen_meta <- rbind(ds1anymhscreen_meta,
ds2anymhscreen_meta))

```

```

##      m1i  sd1i n1i  m2i  sd2i n2i  yi  vi
## 1 5.307692 2.225395 169 4.767956 2.312111 181 0.5397 0.0588
## 2 4.889262 2.184538 298 4.549296 2.235523 284 0.3400 0.0336

```

```

(any_vgdaysweek_meta <- rma(yi=yi, vi=vi, measure="MD", method="FE",
data=anymhscreen_meta))

```

```

##
## Fixed-Effects Model (k = 2)
##
## Test for Heterogeneity:

```

```
## Q(df = 1) = 0.4317, p-val = 0.5112
##
## Model Results:
##
## estimate      se    zval    pval  ci.lb  ci.ub
## 0.4126 0.1463 2.8210 0.0048 0.1259 0.6993 **
##
## ---
## Signif. codes: 0 '***' 0.001 '**' 0.01 '*' 0.05 '.' 0.1 ' ' 1
```

## PTSD screen

### Replicated Effect

#### Hours per day

##### Study 1

```
(vghrsday_ptsd_ds1 <- t.test(vghrsday ~ ptsd, data=ds1))
```

```
##
## Welch Two Sample t-test
##
## data: vghrsday by ptsd
## t = -2.252, df = 280.54, p-value = 0.02509
## alternative hypothesis: true difference in means is not equal to 0
## 95 percent confidence interval:
## -0.84264162 -0.05661409
## sample estimates:
## mean in group 0 mean in group 1
## 2.116162 2.565789
```

##### Study 2

```
(vghrsday_ptsd_ds2 <- t.test(vghrsday ~ ptsd, data=ds2))
```

```
##
## Welch Two Sample t-test
##
## data: vghrsday by ptsd
## t = -2.9187, df = 394.62, p-value = 0.003717
## alternative hypothesis: true difference in means is not equal to 0
## 95 percent confidence interval:
## -1.4158620 -0.2761402
## sample estimates:
## mean in group 0 mean in group 1
## 3.211268 4.057269
```

## Hours per week

### Study 1

```
(vghrsweek_ptsd_ds1 <- t.test(vghrsweek ~ ptsd, data=ds1))
```

```
##  
## Welch Two Sample t-test  
##  
## data: vghrsweek by ptsd  
## t = -2.2043, df = 274.48, p-value = 0.02833  
## alternative hypothesis: true difference in means is not equal to 0  
## 95 percent confidence interval:  
## -6.2545188 -0.3532696  
## sample estimates:  
## mean in group 0 mean in group 1  
## 11.37374 14.67763
```

### Study 2

```
(vghrsweek_ptsd_ds2 <- t.test(vghrsweek ~ ptsd, data=ds2))
```

```
##  
## Welch Two Sample t-test  
##  
## data: vghrsweek by ptsd  
## t = -3.5232, df = 376.41, p-value = 0.0004787  
## alternative hypothesis: true difference in means is not equal to 0  
## 95 percent confidence interval:  
## -10.817470 -3.068092  
## sample estimates:  
## mean in group 0 mean in group 1  
## 15.65634 22.59912
```

## Days per week

### Study 1

```
(vgdaysweek_ptsd_ds1 <- t.test(vgdaysweek ~ ptsd, data=ds1))
```

```
##  
## Welch Two Sample t-test  
##  
## data: vgdaysweek by ptsd  
## t = -0.92919, df = 326.33, p-value = 0.3535  
## alternative hypothesis: true difference in means is not equal to 0  
## 95 percent confidence interval:  
## -0.7125949 0.2553912
```

```
## sample estimates:
## mean in group 0 mean in group 1
##      4.929293      5.157895
```

## Study 2

```
(vgdaysweek_ptsd_ds2 <- t.test(vgdaysweek ~ ptsd, data=ds2))
```

```
##
## Welch Two Sample t-test
##
## data: vgdaysweek by ptsd
## t = -2.6387, df = 495.96, p-value = 0.008584
## alternative hypothesis: true difference in means is not equal to 0
## 95 percent confidence interval:
## -0.8542093 -0.1250549
## sample estimates:
## mean in group 0 mean in group 1
##      4.532394      5.022026
```

## MD

### Hours per day

#### *#Study 1*

```
ptsd_yes_ds1_vghrsday <- subset(ptsd_yes_ds1, select = c(vghrsday))
#Subset 1i data
ptsd_vghrsday_m1i <- apply(ptsd_yes_ds1_vghrsday, 2, mean) #Calculate
m1i
ptsd_vghrsday_sd1i <- apply(ptsd_yes_ds1_vghrsday, 2, sd) #Calculate sd1i
ptsd_vghrsday_n1i <- colSums(!is.na(ptsd_yes_ds1_vghrsday)) #Calculate
n1i
ptsd_no_ds1_vghrsday <- subset(ptsd_no_ds1, select = c(vghrsday)) #Subset
2i data
ptsd_vghrsday_m2i <- apply(ptsd_no_ds1_vghrsday, 2, mean) #Calculate
m2i
ptsd_vghrsday_sd2i <- apply(ptsd_no_ds1_vghrsday, 2, sd) #Calculate sd2i
ptsd_vghrsday_n2i <- colSums(!is.na(ptsd_no_ds1_vghrsday)) #Calculate n2i
ds1ptsd_meta <- data.frame(m1i = ptsd_vghrsday_m1i, sd1i =
ptsd_vghrsday_sd1i, n1i = ptsd_vghrsday_n1i, m2i = ptsd_vghrsday_m2i,
sd2i = ptsd_vghrsday_sd2i, n2i = ptsd_vghrsday_n2i) #MA dataframe
ds1ptsd_meta <- escalc(measure="MD", m1i = m1i, sd1i = sd1i, n1i = n1i,
m2i = m2i, sd2i = sd2i, n2i = n2i, data=ds1ptsd_meta) #Calculate yi and vi
```

#### *#Study 2*

```
ptsd_yes_ds2_vghrsday <- subset(ptsd_yes_ds2, select = c(vghrsday))
#Subset 1i data
ptsd_vghrsday_m1i <- apply(ptsd_yes_ds2_vghrsday, 2, mean) #Calculate
```

```

m1i
ptsd_vghrsday_sd1i <- apply(ptsd_yes_ds2_vghrsday, 2, sd) #Calculate sd1i
ptsd_vghrsday_n1i <- colSums(!is.na(ptsd_yes_ds2_vghrsday)) #Calculate
n1i
ptsd_no_ds2_vghrsday <- subset(ptsd_no_ds2, select = c(vghrsday)) #Subset
2i data
ptsd_vghrsday_m2i <- apply(ptsd_no_ds2_vghrsday, 2, mean) #Calculate
m2i
ptsd_vghrsday_sd2i <- apply(ptsd_no_ds2_vghrsday, 2, sd) #Calculate sd2i
ptsd_vghrsday_n2i <- colSums(!is.na(ptsd_no_ds2_vghrsday)) #Calculate n2i
ds2ptsd_meta <- data.frame(m1i = ptsd_vghrsday_m1i, sd1i =
ptsd_vghrsday_sd1i, n1i = ptsd_vghrsday_n1i, m2i = ptsd_vghrsday_m2i,
sd2i = ptsd_vghrsday_sd2i, n2i = ptsd_vghrsday_n2i) #MA dataframe
ds2ptsd_meta <- escalc(measure="MD", m1i = m1i, sd1i = sd1i, n1i = n1i,
m2i = m2i, sd2i = sd2i, n2i = n2i, data=ds2ptsd_meta) #Calculate yi and vi

#FE meta-analysis
(ptsd_meta <- rbind(ds1ptsd_meta, ds2ptsd_meta))

##      m1i sd1i n1i  m2i sd2i n2i  yi  vi
## 1 2.565789 2.025242 152 2.116162 1.596837 198 0.4496 0.0399
## 2 4.057269 3.715702 227 3.211268 2.869652 355 0.8460 0.0840

(any_vghrsday_meta <- rma(yi=yi, vi=vi, measure="MD", method="FE",
data=ptsd_meta))

##
## Fixed-Effects Model (k = 2)
##
## Test for Heterogeneity:
## Q(df = 1) = 1.2683, p-val = 0.2601
##
## Model Results:
##
## estimate    se    zval    pval    ci.lb    ci.ub
## 0.5772 0.1644 3.5103 0.0004 0.2549 0.8994 ***
##
## ---
## Signif. codes: 0 '***' 0.001 '**' 0.01 '*' 0.05 '.' 0.1 ' ' 1

```

## Hours per week

```

#Study 1
ptsd_yes_ds1_vghrsweek <- subset(ptsd_yes_ds1, select = c(vghrsweek))
#Subset 1i data
ptsd_vghrsweek_m1i <- apply(ptsd_yes_ds1_vghrsweek, 2, mean) #Calculate
m1i
ptsd_vghrsweek_sd1i <- apply(ptsd_yes_ds1_vghrsweek, 2, sd) #Calculate
sd1i
ptsd_vghrsweek_n1i <- colSums(!is.na(ptsd_yes_ds1_vghrsweek)) #Calculate

```

```

n1i
ptsd_no_ds1_vghrsweek <- subset(ptsd_no_ds1, select = c(vghrsweek))
#Subset 2i data
ptsd_vghrsweek_m2i <- apply(ptsd_no_ds1_vghrsweek, 2, mean) #Calculate
m2i
ptsd_vghrsweek_sd2i <- apply(ptsd_no_ds1_vghrsweek, 2, sd) #Calculate
sd2i
ptsd_vghrsweek_n2i <- colSums(!is.na(ptsd_no_ds1_vghrsweek)) #Calculate
n2i
ds1ptsd_meta <- data.frame(m1i = ptsd_vghrsweek_m1i, sd1i =
ptsd_vghrsweek_sd1i, n1i = ptsd_vghrsweek_n1i, m2i =
ptsd_vghrsweek_m2i, sd2i = ptsd_vghrsweek_sd2i, n2i =
ptsd_vghrsweek_n2i) #MA dataframe
ds1ptsd_meta <- escalc(measure="MD", m1i = m1i, sd1i = sd1i, n1i = n1i,
m2i = m2i, sd2i = sd2i, n2i = n2i, data=ds1ptsd_meta) #Calculate yi and vi

#Study 2
ptsd_yes_ds2_vghrsweek <- subset(ptsd_yes_ds2, select = c(vghrsweek))
#Subset 1i data
ptsd_vghrsweek_m1i <- apply(ptsd_yes_ds2_vghrsweek, 2, mean) #Calculate
m1i
ptsd_vghrsweek_sd1i <- apply(ptsd_yes_ds2_vghrsweek, 2, sd) #Calculate
sd1i
ptsd_vghrsweek_n1i <- colSums(!is.na(ptsd_yes_ds2_vghrsweek)) #Calculate
n1i
ptsd_no_ds2_vghrsweek <- subset(ptsd_no_ds2, select = c(vghrsweek))
#Subset 2i data
ptsd_vghrsweek_m2i <- apply(ptsd_no_ds2_vghrsweek, 2, mean) #Calculate
m2i
ptsd_vghrsweek_sd2i <- apply(ptsd_no_ds2_vghrsweek, 2, sd) #Calculate
sd2i
ptsd_vghrsweek_n2i <- colSums(!is.na(ptsd_no_ds2_vghrsweek)) #Calculate
n2i
ds2ptsd_meta <- data.frame(m1i = ptsd_vghrsweek_m1i, sd1i =
ptsd_vghrsweek_sd1i, n1i = ptsd_vghrsweek_n1i, m2i =
ptsd_vghrsweek_m2i, sd2i = ptsd_vghrsweek_sd2i, n2i =
ptsd_vghrsweek_n2i) #MA dataframe
ds2ptsd_meta <- escalc(measure="MD", m1i = m1i, sd1i = sd1i, n1i = n1i,
m2i = m2i, sd2i = sd2i, n2i = n2i, data=ds2ptsd_meta) #Calculate yi and vi

#FE meta-analysis
(ptsd_meta <- rbind(ds1ptsd_meta, ds2ptsd_meta))

##      m1i  sd1i n1i   m2i  sd2i n2i   yi   vi
## 1 14.67763 15.35393 152 11.37374 11.73488 198 3.3039 2.2464
## 2 22.59912 25.68276 227 15.65634 18.62703 355 6.9428 3.8831

(any_vghrsweek_meta <- rma(yi=yi, vi=vi, measure="MD", method="FE",
data=ptsd_meta))

```

```

##
## Fixed-Effects Model (k = 2)
##
## Test for Heterogeneity:
## Q(df = 1) = 2.1603, p-val = 0.1416
##
## Model Results:
##
## estimate      se      zval      pval      ci.lb      ci.ub
## 4.6375      1.1930      3.8874      0.0001      2.2994      6.9757      ***
##
## ---
## Signif. codes:  0 '***' 0.001 '**' 0.01 '*' 0.05 '.' 0.1 ' ' 1

```

## Days per week

```

#Study 1
ptsd_yes_ds1_vgdaysweek <- subset(ptsd_yes_ds1, select = c(vgdaysweek))
#Subset 1i data
ptsd_vgdaysweek_m1i <- apply(ptsd_yes_ds1_vgdaysweek, 2, mean)
#Calculate m1i
ptsd_vgdaysweek_sd1i <- apply(ptsd_yes_ds1_vgdaysweek, 2, sd) #Calculate
sd1i
ptsd_vgdaysweek_n1i <- colSums(!is.na(ptsd_yes_ds1_vgdaysweek))
#Calculate n1i
ptsd_no_ds1_vgdaysweek <- subset(ptsd_no_ds1, select = c(vgdaysweek))
#Subset 2i data
ptsd_vgdaysweek_m2i <- apply(ptsd_no_ds1_vgdaysweek, 2, mean)
#Calculate m2i
ptsd_vgdaysweek_sd2i <- apply(ptsd_no_ds1_vgdaysweek, 2, sd) #Calculate
sd2i
ptsd_vgdaysweek_n2i <- colSums(!is.na(ptsd_no_ds1_vgdaysweek))
#Calculate n2i
ds1ptsd_meta <- data.frame(m1i = ptsd_vgdaysweek_m1i, sd1i =
ptsd_vgdaysweek_sd1i, n1i = ptsd_vgdaysweek_n1i, m2i =
ptsd_vgdaysweek_m2i, sd2i = ptsd_vgdaysweek_sd2i, n2i =
ptsd_vgdaysweek_n2i) #MA dataframe
ds1ptsd_meta <- escalc(measure="MD", m1i = m1i, sd1i = sd1i, n1i = n1i,
m2i = m2i, sd2i = sd2i, n2i = n2i, data=ds1ptsd_meta) #Calculate yi and vi

#Study 2
ptsd_yes_ds2_vgdaysweek <- subset(ptsd_yes_ds2, select = c(vgdaysweek))
#Subset 1i data
ptsd_vgdaysweek_m1i <- apply(ptsd_yes_ds2_vgdaysweek, 2, mean)
#Calculate m1i
ptsd_vgdaysweek_sd1i <- apply(ptsd_yes_ds2_vgdaysweek, 2, sd) #Calculate
sd1i
ptsd_vgdaysweek_n1i <- colSums(!is.na(ptsd_yes_ds2_vgdaysweek))
#Calculate n1i

```



```

ptsd_no_ds2_vgdaysweek <- subset(ptsd_no_ds2, select = c(vgdaysweek))
#Subset 2i data
ptsd_vgdaysweek_m2i <- apply(ptsd_no_ds2_vgdaysweek, 2, mean)
#Calculate m2i
ptsd_vgdaysweek_sd2i <- apply(ptsd_no_ds2_vgdaysweek, 2, sd) #Calculate
sd2i
ptsd_vgdaysweek_n2i <- colSums(!is.na(ptsd_no_ds2_vgdaysweek))
#Calculate n2i
ds2ptsd_meta <- data.frame(m1i = ptsd_vgdaysweek_m1i, sd1i =
ptsd_vgdaysweek_sd1i, n1i = ptsd_vgdaysweek_n1i, m2i =
ptsd_vgdaysweek_m2i, sd2i = ptsd_vgdaysweek_sd2i, n2i =
ptsd_vgdaysweek_n2i) #MA dataframe
ds2ptsd_meta <- escalc(measure="MD", m1i = m1i, sd1i = sd1i, n1i = n1i,
m2i = m2i, sd2i = sd2i, n2i = n2i, data=ds2ptsd_meta) #Calculate yi and vi

#FE meta-analysis
(ptsd_meta <- rbind(ds1ptsd_meta, ds2ptsd_meta))

##      m1i  sd1i n1i   m2i  sd2i n2i   yi   vi
## 1 5.157895 2.273094 152 4.929293 2.292130 198 0.2286 0.0605
## 2 5.022026 2.148152 227 4.532394 2.237569 355 0.4896 0.0344

(any_vgdaysweek_meta <- rma(yi=yi, vi=vi, measure="MD", method="FE",
data=ptsd_meta))

##
## Fixed-Effects Model (k = 2)
##
## Test for Heterogeneity:
## Q(df = 1) = 0.7175, p-val = 0.3970
##
## Model Results:
##
## estimate    se    zval    pval    ci.lb    ci.ub
## 0.3950  0.1481  2.6662  0.0077  0.1046  0.6853    **
##
## ---
## Signif. codes:  0 '***' 0.001 '**' 0.01 '*' 0.05 '.' 0.1 ' ' 1

```

## Depression screen

### Replicated Effect

#### Hours per day

##### Study 1

```
(vghrsday_depression_ds1 <- t.test(vghrsday ~ depression, data=ds1))
```

```
##
## Welch Two Sample t-test
##
## data: vghrsday by depression
## t = -2.9955, df = 324.01, p-value = 0.002951
## alternative hypothesis: true difference in means is not equal to 0
## 95 percent confidence interval:
## -0.9548135 -0.1978231
## sample estimates:
## mean in group 0 mean in group 1
##      2.033149      2.609467
```

## Study 2

```
(vghrsday_depression_ds2 <- t.test(vghrsday ~ depression, data=ds2))
```

```
##
## Welch Two Sample t-test
##
## data: vghrsday by depression
## t = -2.496, df = 529.18, p-value = 0.01286
## alternative hypothesis: true difference in means is not equal to 0
## 95 percent confidence interval:
## -1.2133616 -0.1445957
## sample estimates:
## mean in group 0 mean in group 1
##      3.225080      3.904059
```

## Hours per week

### Study 1

```
(vghrsweek_depression_ds1 <- t.test(vghrsweek ~ depression, data=ds1))
```

```
##
## Welch Two Sample t-test
##
## data: vghrsweek by depression
## t = -3.1385, df = 320.04, p-value = 0.001856
## alternative hypothesis: true difference in means is not equal to 0
## 95 percent confidence interval:
## -7.340716 -1.683639
## sample estimates:
## mean in group 0 mean in group 1
##      10.62983      15.14201
```

## Study 2

```
(vghrsweek_depression_ds2 <- t.test(vghrsweek ~ depression, data=ds2))
```

```
##  
## Welch Two Sample t-test  
##  
## data: vghrsweek by depression  
## t = -2.8314, df = 512.1, p-value = 0.004818  
## alternative hypothesis: true difference in means is not equal to 0  
## 95 percent confidence interval:  
## -8.811186 -1.592392  
## sample estimates:  
## mean in group 0 mean in group 1  
## 15.94212 21.14391
```

## Days per week

### Study 1

```
(vgdaysweek_depression_ds1 <- t.test(vgdaysweek ~ depression, data=ds1))
```

```
##  
## Welch Two Sample t-test  
##  
## data: vgdaysweek by depression  
## t = -2.2251, df = 347.68, p-value = 0.02672  
## alternative hypothesis: true difference in means is not equal to 0  
## 95 percent confidence interval:  
## -1.01682148 -0.06265154  
## sample estimates:  
## mean in group 0 mean in group 1  
## 4.767956 5.307692
```

### Study 2

```
(vgdaysweek_depression_ds2 <- t.test(vgdaysweek ~ depression, data=ds2))
```

```
##  
## Welch Two Sample t-test  
##  
## data: vgdaysweek by depression  
## t = -1.6935, df = 573.01, p-value = 0.0909  
## alternative hypothesis: true difference in means is not equal to 0  
## 95 percent confidence interval:  
## -0.67065343 0.04961192  
## sample estimates:  
## mean in group 0 mean in group 1  
## 4.578778 4.889299
```

## MD

### Hours per day

```
#Study 1
depression_yes_ds1_vghrsday <- subset(depression_yes_ds1, select =
c(vghrsday)) #Subset 1i data
depression_vghrsday_m1i <- apply(depression_yes_ds1_vghrsday, 2, mean)
#Calculate m1i
depression_vghrsday_sd1i <- apply(depression_yes_ds1_vghrsday, 2, sd)
#Calculate sd1i
depression_vghrsday_n1i <- colSums(!is.na(depression_yes_ds1_vghrsday))
#Calculate n1i
depression_no_ds1_vghrsday <- subset(depression_no_ds1, select =
c(vghrsday)) #Subset 2i data
depression_vghrsday_m2i <- apply(depression_no_ds1_vghrsday, 2, mean)
#Calculate m2i
depression_vghrsday_sd2i <- apply(depression_no_ds1_vghrsday, 2, sd)
#Calculate sd2i
depression_vghrsday_n2i <- colSums(!is.na(depression_no_ds1_vghrsday))
#Calculate n2i
ds1depression_meta <- data.frame(m1i = depression_vghrsday_m1i, sd1i =
depression_vghrsday_sd1i, n1i = depression_vghrsday_n1i, m2i =
depression_vghrsday_m2i, sd2i = depression_vghrsday_sd2i, n2i =
depression_vghrsday_n2i) #MA dataframe
ds1depression_meta <- escalc(measure="MD", m1i = m1i, sd1i = sd1i, n1i =
n1i, m2i = m2i, sd2i = sd2i, n2i = n2i, data=ds1depression_meta)
#Calculate yi and vi

#Study 2
depression_yes_ds2_vghrsday <- subset(depression_yes_ds2, select =
c(vghrsday)) #Subset 1i data
depression_vghrsday_m1i <- apply(depression_yes_ds2_vghrsday, 2, mean)
#Calculate m1i
depression_vghrsday_sd1i <- apply(depression_yes_ds2_vghrsday, 2, sd)
#Calculate sd1i
depression_vghrsday_n1i <- colSums(!is.na(depression_yes_ds2_vghrsday))
#Calculate n1i
depression_no_ds2_vghrsday <- subset(depression_no_ds2, select =
c(vghrsday)) #Subset 2i data
depression_vghrsday_m2i <- apply(depression_no_ds2_vghrsday, 2, mean)
#Calculate m2i
depression_vghrsday_sd2i <- apply(depression_no_ds2_vghrsday, 2, sd)
#Calculate sd2i
depression_vghrsday_n2i <- colSums(!is.na(depression_no_ds2_vghrsday))
#Calculate n2i
ds2depression_meta <- data.frame(m1i = depression_vghrsday_m1i, sd1i =
depression_vghrsday_sd1i, n1i = depression_vghrsday_n1i, m2i =
depression_vghrsday_m2i, sd2i = depression_vghrsday_sd2i, n2i =
```

```

depression_vghrsday_n2i) #MA dataframe
ds2depression_meta <- escalc(measure="MD", m1i = m1i, sd1i = sd1i, n1i =
n1i, m2i = m2i, sd2i = sd2i, n2i = n2i, data=ds2depression_meta)
#Calculate yi and vi

#FE meta-analysis
(depression_meta <- rbind(ds1depression_meta, ds2depression_meta))

##      m1i  sd1i n1i  m2i  sd2i n2i  yi  vi
## 1 2.609467 1.967330 169 2.033149 1.598265 181 0.5763 0.0370
## 2 3.904059 3.526359 271 3.225080 2.956810 311 0.6790 0.0740

(any_vghrsday_meta <- rma(yi=yi, vi=vi, measure="MD", method="FE",
data=depression_meta))

##
## Fixed-Effects Model (k = 2)
##
## Test for Heterogeneity:
## Q(df = 1) = 0.0949, p-val = 0.7580
##
## Model Results:
##
## estimate      se    zval    pval  ci.lb  ci.ub
## 0.6105  0.1571  3.8870  0.0001  0.3027  0.9184    ***
##
## ---
## Signif. codes:  0 '***' 0.001 '**' 0.01 '*' 0.05 '.' 0.1 ' ' 1

```

## Hours per week

```

#Study 1
depression_yes_ds1_vghrsweek <- subset(depression_yes_ds1, select =
c(vghrsweek)) #Subset 1i data
depression_vghrsweek_m1i <- apply(depression_yes_ds1_vghrsweek, 2,
mean) #Calculate m1i
depression_vghrsweek_sd1i <- apply(depression_yes_ds1_vghrsweek, 2, sd)
#Calculate sd1i
depression_vghrsweek_n1i <- colSums(!
is.na(depression_yes_ds1_vghrsweek)) #Calculate n1i
depression_no_ds1_vghrsweek <- subset(depression_no_ds1, select =
c(vghrsweek)) #Subset 2i data
depression_vghrsweek_m2i <- apply(depression_no_ds1_vghrsweek, 2,
mean) #Calculate m2i
depression_vghrsweek_sd2i <- apply(depression_no_ds1_vghrsweek, 2, sd)
#Calculate sd2i
depression_vghrsweek_n2i <- colSums(!is.na(depression_no_ds1_vghrsweek))
#Calculate n2i
ds1depression_meta <- data.frame(m1i = depression_vghrsweek_m1i, sd1i =
depression_vghrsweek_sd1i, n1i = depression_vghrsweek_n1i, m2i =

```

```

depression_vghrsweek_m2i, sd2i = depression_vghrsweek_sd2i, n2i =
depression_vghrsweek_n2i) #MA dataframe
ds1depression_meta <- escalc(measure="MD", m1i = m1i, sd1i = sd1i, n1i =
n1i, m2i = m2i, sd2i = sd2i, n2i = n2i, data=ds1depression_meta)
#Calculate yi and vi

#Study 2
depression_yes_ds2_vghrsweek <- subset(depression_yes_ds2, select =
c(vghrsweek)) #Subset 1i data
depression_vghrsweek_m1i <- apply(depression_yes_ds2_vghrsweek, 2,
mean) #Calculate m1i
depression_vghrsweek_sd1i <- apply(depression_yes_ds2_vghrsweek, 2, sd)
#Calculate sd1i
depression_vghrsweek_n1i <- colSums(!
is.na(depression_yes_ds2_vghrsweek)) #Calculate n1i
depression_no_ds2_vghrsweek <- subset(depression_no_ds2, select =
c(vghrsweek)) #Subset 2i data
depression_vghrsweek_m2i <- apply(depression_no_ds2_vghrsweek, 2,
mean) #Calculate m2i
depression_vghrsweek_sd2i <- apply(depression_no_ds2_vghrsweek, 2, sd)
#Calculate sd2i
depression_vghrsweek_n2i <- colSums(!is.na(depression_no_ds2_vghrsweek))
#Calculate n2i
ds2depression_meta <- data.frame(m1i = depression_vghrsweek_m1i, sd1i =
depression_vghrsweek_sd1i, n1i = depression_vghrsweek_n1i, m2i =
depression_vghrsweek_m2i, sd2i = depression_vghrsweek_sd2i, n2i =
depression_vghrsweek_n2i) #MA dataframe
ds2depression_meta <- escalc(measure="MD", m1i = m1i, sd1i = sd1i, n1i =
n1i, m2i = m2i, sd2i = sd2i, n2i = n2i, data=ds2depression_meta)
#Calculate yi and vi

#FE meta-analysis
(depression_meta <- rbind(ds1depression_meta, ds2depression_meta))

##      m1i  sd1i n1i   m2i  sd2i n2i   yi   vi
## 1 15.14201 14.84014 169 10.62983 11.75826 181 4.5122 2.0670
## 2 21.14391 24.33024 271 15.94212 19.24569 311 5.2018 3.3753

(any_vghrsweek_meta <- rma(yi=yi, vi=vi, measure="MD", method="FE",
data=depression_meta))

##
## Fixed-Effects Model (k = 2)
##
## Test for Heterogeneity:
## Q(df = 1) = 0.0874, p-val = 0.7675
##
## Model Results:
##
## estimate    se    zval    pval  ci.lb  ci.ub
## 4.7741  1.1322  4.2165  <.0001  2.5550  6.9932  ***

```

```
##  
## ---  
## Signif. codes:  0 '***' 0.001 '**' 0.01 '*' 0.05 '.' 0.1 ' ' 1
```

## Days per week

### #Study 1

```
depression_yes_ds1_vgdaysweek <- subset(depression_yes_ds1, select =  
c(vgdaysweek)) #Subset 1i data  
depression_vgdaysweek_m1i <- apply(depression_yes_ds1_vgdaysweek, 2,  
mean) #Calculate m1i  
depression_vgdaysweek_sd1i <- apply(depression_yes_ds1_vgdaysweek, 2,  
sd) #Calculate sd1i  
depression_vgdaysweek_n1i <- colSums(!  
is.na(depression_yes_ds1_vgdaysweek)) #Calculate n1i  
depression_no_ds1_vgdaysweek <- subset(depression_no_ds1, select =  
c(vgdaysweek)) #Subset 2i data  
depression_vgdaysweek_m2i <- apply(depression_no_ds1_vgdaysweek, 2,  
mean) #Calculate m2i  
depression_vgdaysweek_sd2i <- apply(depression_no_ds1_vgdaysweek, 2,  
sd) #Calculate sd2i  
depression_vgdaysweek_n2i <- colSums(!  
is.na(depression_no_ds1_vgdaysweek)) #Calculate n2i  
ds1depression_meta <- data.frame(m1i = depression_vgdaysweek_m1i, sd1i  
= depression_vgdaysweek_sd1i, n1i = depression_vgdaysweek_n1i, m2i =  
depression_vgdaysweek_m2i, sd2i = depression_vgdaysweek_sd2i, n2i =  
depression_vgdaysweek_n2i) #MA dataframe  
ds1depression_meta <- escalc(measure="MD", m1i = m1i, sd1i = sd1i, n1i =  
n1i, m2i = m2i, sd2i = sd2i, n2i = n2i, data=ds1depression_meta)  
#Calculate yi and vi
```

### #Study 2

```
depression_yes_ds2_vgdaysweek <- subset(depression_yes_ds2, select =  
c(vgdaysweek)) #Subset 1i data  
depression_vgdaysweek_m1i <- apply(depression_yes_ds2_vgdaysweek, 2,  
mean) #Calculate m1i  
depression_vgdaysweek_sd1i <- apply(depression_yes_ds2_vgdaysweek, 2,  
sd) #Calculate sd1i  
depression_vgdaysweek_n1i <- colSums(!  
is.na(depression_yes_ds2_vgdaysweek)) #Calculate n1i  
depression_no_ds2_vgdaysweek <- subset(depression_no_ds2, select =  
c(vgdaysweek)) #Subset 2i data  
depression_vgdaysweek_m2i <- apply(depression_no_ds2_vgdaysweek, 2,  
mean) #Calculate m2i  
depression_vgdaysweek_sd2i <- apply(depression_no_ds2_vgdaysweek, 2,  
sd) #Calculate sd2i  
depression_vgdaysweek_n2i <- colSums(!  
is.na(depression_no_ds2_vgdaysweek)) #Calculate n2i  
ds2depression_meta <- data.frame(m1i = depression_vgdaysweek_m1i, sd1i
```

```

= depression_vgdaysweek_sd1i, n1i = depression_vgdaysweek_n1i, m2i =
depression_vgdaysweek_m2i, sd2i = depression_vgdaysweek_sd2i, n2i =
depression_vgdaysweek_n2i) #MA dataframe
ds2depression_meta <- escalc(measure="MD", m1i = m1i, sd1i = sd1i, n1i =
n1i, m2i = m2i, sd2i = sd2i, n2i = n2i, data=ds2depression_meta)
#Calculate yi and vi

#FE meta-analysis
(depression_meta <- rbind(ds1depression_meta, ds2depression_meta))

##      m1i  sd1i n1i  m2i  sd2i n2i  yi  vi
## 1 5.307692 2.225395 169 4.767956 2.312111 181 0.5397 0.0588
## 2 4.889299 2.177902 271 4.578778 2.238822 311 0.3105 0.0336

(any_vgdaysweek_meta <- rma(yi=yi, vi=vi, measure="MD", method="FE",
data=depression_meta))

##
## Fixed-Effects Model (k = 2)
##
## Test for Heterogeneity:
## Q(df = 1) = 0.5683, p-val = 0.4510
##
## Model Results:
##
## estimate    se    zval    pval    ci.lb    ci.ub
## 0.3939 0.1463 2.6927 0.0071 0.1072 0.6806 **
##
## ---
## Signif. codes: 0 '***' 0.001 '**' 0.01 '*' 0.05 '.' 0.1 ' ' 1

```

## Any SUD screen

### Replicated Effect

#### Hours per day

##### Study 1

```

(vghrsday_anysudscreen_ds1 <- t.test(vghrsday ~ anysudscreen, data=ds1))

##
## Welch Two Sample t-test
##
## data: vghrsday by anysudscreen
## t = 1.4664, df = 288.13, p-value = 0.1436
## alternative hypothesis: true difference in means is not equal to 0
## 95 percent confidence interval:

```



```
## -0.09918005 0.67875421
## sample estimates:
## mean in group 0 mean in group 1
## 2.466258 2.176471
```

## Study 2

```
(vghrsday_anysudscreen_ds2 <- t.test(vghrsday ~ anysudscreen, data=ds2))
```

```
##
## Welch Two Sample t-test
##
## data: vghrsday by anysudscreen
## t = -0.39796, df = 522.95, p-value = 0.6908
## alternative hypothesis: true difference in means is not equal to 0
## 95 percent confidence interval:
## -0.6467302 0.4288460
## sample estimates:
## mean in group 0 mean in group 1
## 3.490323 3.599265
```

## Hours per week

### Study 1

```
(vghrweek_anysudscreen_ds1 <- t.test(vghrweek ~ anysudscreen,
data=ds1))
```

```
##
## Welch Two Sample t-test
##
## data: vghrweek by anysudscreen
## t = 1.1582, df = 288.12, p-value = 0.2477
## alternative hypothesis: true difference in means is not equal to 0
## 95 percent confidence interval:
## -1.198254 4.624717
## sample estimates:
## mean in group 0 mean in group 1
## 13.72393 12.01070
```

### Study 2

```
(vghrweek_anysudscreen_ds2 <- t.test(vghrweek ~ anysudscreen,
data=ds2))
```

```
##
## Welch Two Sample t-test
##
```

```
## data: vghrsweek by anysudscreen
## t = -0.23956, df = 530.76, p-value = 0.8108
## alternative hypothesis: true difference in means is not equal to 0
## 95 percent confidence interval:
## -4.059154 3.176754
## sample estimates:
## mean in group 0 mean in group 1
## 18.15806 18.59926
```

## Days per week

### Study 1

```
(vgdaysweek_anysudscreen_ds1 <- t.test(vgdaysweek ~ anysudscreen,
data=ds1))
```

```
##
## Welch Two Sample t-test
##
## data: vgdaysweek by anysudscreen
## t = -0.73081, df = 333.82, p-value = 0.4654
## alternative hypothesis: true difference in means is not equal to 0
## 95 percent confidence interval:
## -0.6637049 0.3041366
## sample estimates:
## mean in group 0 mean in group 1
## 4.932515 5.112299
```

### Study 2

```
(vgdaysweek_anysudscreen_ds2 <- t.test(vgdaysweek ~ anysudscreen,
data=ds2))
```

```
##
## Welch Two Sample t-test
##
## data: vgdaysweek by anysudscreen
## t = -0.0091488, df = 570.67, p-value = 0.9927
## alternative hypothesis: true difference in means is not equal to 0
## 95 percent confidence interval:
## -0.3632316 0.3598635
## sample estimates:
## mean in group 0 mean in group 1
## 4.722581 4.724265
```

## MD

### Hours per day

```
#Study 1
anysudscreen_yes_ds1_vghrsday <- subset(anysudscreen_yes_ds1, select =
c(vghrsday)) #Subset 1i data
anysudscreen_vghrsday_m1i <- apply(anysudscreen_yes_ds1_vghrsday, 2,
mean) #Calculate m1i
anysudscreen_vghrsday_sd1i <- apply(anysudscreen_yes_ds1_vghrsday, 2,
sd) #Calculate sd1i
anysudscreen_vghrsday_n1i <- colSums(!
is.na(anysudscreen_yes_ds1_vghrsday)) #Calculate n1i
anysudscreen_no_ds1_vghrsday <- subset(anysudscreen_no_ds1, select =
c(vghrsday)) #Subset 2i data
anysudscreen_vghrsday_m2i <- apply(anysudscreen_no_ds1_vghrsday, 2,
mean) #Calculate m2i
anysudscreen_vghrsday_sd2i <- apply(anysudscreen_no_ds1_vghrsday, 2, sd)
#Calculate sd2i
anysudscreen_vghrsday_n2i <- colSums(!
is.na(anysudscreen_no_ds1_vghrsday)) #Calculate n2i
ds1anysudscreen_meta <- data.frame(m1i = anysudscreen_vghrsday_m1i,
sd1i = anysudscreen_vghrsday_sd1i, n1i = anysudscreen_vghrsday_n1i, m2i
= anysudscreen_vghrsday_m2i, sd2i = anysudscreen_vghrsday_sd2i, n2i =
anysudscreen_vghrsday_n2i) #MA dataframe
ds1anysudscreen_meta <- escalc(measure="MD", m1i = m1i, sd1i = sd1i,
n1i = n1i, m2i = m2i, sd2i = sd2i, n2i = n2i, data=ds1anysudscreen_meta)
#Calculate yi and vi

#Study 2
anysudscreen_yes_ds2_vghrsday <- subset(anysudscreen_yes_ds2, select =
c(vghrsday)) #Subset 1i data
anysudscreen_vghrsday_m1i <- apply(anysudscreen_yes_ds2_vghrsday, 2,
mean) #Calculate m1i
anysudscreen_vghrsday_sd1i <- apply(anysudscreen_yes_ds2_vghrsday, 2,
sd) #Calculate sd1i
anysudscreen_vghrsday_n1i <- colSums(!
is.na(anysudscreen_yes_ds2_vghrsday)) #Calculate n1i
anysudscreen_no_ds2_vghrsday <- subset(anysudscreen_no_ds2, select =
c(vghrsday)) #Subset 2i data
anysudscreen_vghrsday_m2i <- apply(anysudscreen_no_ds2_vghrsday, 2,
mean) #Calculate m2i
anysudscreen_vghrsday_sd2i <- apply(anysudscreen_no_ds2_vghrsday, 2, sd)
#Calculate sd2i
anysudscreen_vghrsday_n2i <- colSums(!
is.na(anysudscreen_no_ds2_vghrsday)) #Calculate n2i
ds2anysudscreen_meta <- data.frame(m1i = anysudscreen_vghrsday_m1i,
sd1i = anysudscreen_vghrsday_sd1i, n1i = anysudscreen_vghrsday_n1i, m2i
= anysudscreen_vghrsday_m2i, sd2i = anysudscreen_vghrsday_sd2i, n2i =
anysudscreen_vghrsday_n2i) #MA dataframe
```

```
ds2anysudscreen_meta <- escalc(measure="MD", m1i = m1i, sd1i = sd1i,
n1i = n1i, m2i = m2i, sd2i = sd2i, n2i = n2i, data=ds2anysudscreen_meta)
#Calculate yi and vi
```

```
#FE meta-analysis
```

```
(anysudscreen_meta <- rbind(ds1anysudscreen_meta,
ds2anysudscreen_meta))
```

```
##      m1i  sd1i n1i  m2i  sd2i n2i  yi  vi
## 1 2.176471 1.497626 187 2.466258 2.100212 163 -0.2898 0.0391
## 2 3.599265 3.589303 272 3.490323 2.923773 310 0.1089 0.0749
```

```
(any_vghrsday_meta <- rma(yi=yi, vi=vi, measure="MD", method="FE",
data=anysudscreen_meta))
```

```
##
```

```
## Fixed-Effects Model (k = 2)
```

```
##
```

```
## Test for Heterogeneity:
```

```
## Q(df = 1) = 1.3947, p-val = 0.2376
```

```
##
```

```
## Model Results:
```

```
##
```

```
## estimate    se    zval    pval    ci.lb    ci.ub
## -0.1532  0.1602 -0.9560  0.3391 -0.4672  0.1609
```

```
##
```

```
## ---
```

```
## Signif. codes:  0 '***' 0.001 '**' 0.01 '*' 0.05 '.' 0.1 ' ' 1
```

## Hours per week

```
#Study 1
```

```
anysudscreen_yes_ds1_vghrsweek <- subset(anysudscreen_yes_ds1, select =
c(vghrsweek)) #Subset 1i data
```

```
anysudscreen_vghrsweek_m1i <- apply(anysudscreen_yes_ds1_vghrsweek, 2,
mean) #Calculate m1i
```

```
anysudscreen_vghrsweek_sd1i <- apply(anysudscreen_yes_ds1_vghrsweek,
2, sd) #Calculate sd1i
```

```
anysudscreen_vghrsweek_n1i <- colSums(!
is.na(anysudscreen_yes_ds1_vghrsweek)) #Calculate n1i
```

```
anysudscreen_no_ds1_vghrsweek <- subset(anysudscreen_no_ds1, select =
c(vghrsweek)) #Subset 2i data
```

```
anysudscreen_vghrsweek_m2i <- apply(anysudscreen_no_ds1_vghrsweek, 2,
mean) #Calculate m2i
```

```
anysudscreen_vghrsweek_sd2i <- apply(anysudscreen_no_ds1_vghrsweek, 2,
sd) #Calculate sd2i
```

```
anysudscreen_vghrsweek_n2i <- colSums(!
is.na(anysudscreen_no_ds1_vghrsweek)) #Calculate n2i
```

```
ds1anysudscreen_meta <- data.frame(m1i = anysudscreen_vghrsweek_m1i,
sd1i = anysudscreen_vghrsweek_sd1i, n1i = anysudscreen_vghrsweek_n1i,
```

```

m2i = anysudscreen_vghrsweek_m2i, sd2i = anysudscreen_vghrsweek_sd2i,
n2i = anysudscreen_vghrsweek_n2i) #MA dataframe
ds1anysudscreen_meta <- escalc(measure="MD", m1i = m1i, sd1i = sd1i,
n1i = n1i, m2i = m2i, sd2i = sd2i, n2i = n2i, data=ds1anysudscreen_meta)
#Calculate yi and vi

#Study 2
anysudscreen_yes_ds2_vghrsweek <- subset(anysudscreen_yes_ds2, select =
c(vghrsweek)) #Subset 1i data
anysudscreen_vghrsweek_m1i <- apply(anysudscreen_yes_ds2_vghrsweek, 2,
mean) #Calculate m1i
anysudscreen_vghrsweek_sd1i <- apply(anysudscreen_yes_ds2_vghrsweek,
2, sd) #Calculate sd1i
anysudscreen_vghrsweek_n1i <- colSums(!
is.na(anysudscreen_yes_ds2_vghrsweek)) #Calculate n1i
anysudscreen_no_ds2_vghrsweek <- subset(anysudscreen_no_ds2, select =
c(vghrsweek)) #Subset 2i data
anysudscreen_vghrsweek_m2i <- apply(anysudscreen_no_ds2_vghrsweek, 2,
mean) #Calculate m2i
anysudscreen_vghrsweek_sd2i <- apply(anysudscreen_no_ds2_vghrsweek, 2,
sd) #Calculate sd2i
anysudscreen_vghrsweek_n2i <- colSums(!
is.na(anysudscreen_no_ds2_vghrsweek)) #Calculate n2i
ds2anysudscreen_meta <- data.frame(m1i = anysudscreen_vghrsweek_m1i,
sd1i = anysudscreen_vghrsweek_sd1i, n1i = anysudscreen_vghrsweek_n1i,
m2i = anysudscreen_vghrsweek_m2i, sd2i = anysudscreen_vghrsweek_sd2i,
n2i = anysudscreen_vghrsweek_n2i) #MA dataframe
ds2anysudscreen_meta <- escalc(measure="MD", m1i = m1i, sd1i = sd1i,
n1i = n1i, m2i = m2i, sd2i = sd2i, n2i = n2i, data=ds2anysudscreen_meta)
#Calculate yi and vi

#FE meta-analysis
(anysudscreen_meta <- rbind(ds1anysudscreen_meta,
ds2anysudscreen_meta))

##      m1i  sd1i n1i   m2i  sd2i n2i   yi   vi
## 1 12.01070 11.20963 187 13.72393 15.72067 163 -1.7132 2.1881
## 2 18.59926 23.90150 272 18.15806 20.01013 310 0.4412 3.3919

(any_vghrsweek_meta <- rma(yi=yi, vi=vi, measure="MD", method="FE",
data=anysudscreen_meta))

##
## Fixed-Effects Model (k = 2)
##
## Test for Heterogeneity:
## Q(df = 1) = 0.8318, p-val = 0.3617
##
## Model Results:
##
## estimate      se      zval      pval      ci.lb      ci.ub

```

```
## -0.8684 1.1533 -0.7530 0.4515 -3.1288 1.3920
##
## ---
## Signif. codes: 0 '***' 0.001 '**' 0.01 '*' 0.05 '.' 0.1 ' ' 1
```

## Days per week

### #Study 1

```
anysudscreen_yes_ds1_vgdaysweek <- subset(anysudscreen_yes_ds1, select
= c(vgdaysweek)) #Subset 1i data
anysudscreen_vgdaysweek_m1i <-
apply(anysudscreen_yes_ds1_vgdaysweek, 2, mean) #Calculate m1i
anysudscreen_vgdaysweek_sd1i <-
apply(anysudscreen_yes_ds1_vgdaysweek, 2, sd) #Calculate sd1i
anysudscreen_vgdaysweek_n1i <- colSums(!
is.na(anysudscreen_yes_ds1_vgdaysweek)) #Calculate n1i
anysudscreen_no_ds1_vgdaysweek <- subset(anysudscreen_no_ds1, select =
c(vgdaysweek)) #Subset 2i data
anysudscreen_vgdaysweek_m2i <- apply(anysudscreen_no_ds1_vgdaysweek,
2, mean) #Calculate m2i
anysudscreen_vgdaysweek_sd2i <- apply(anysudscreen_no_ds1_vgdaysweek,
2, sd) #Calculate sd2i
anysudscreen_vgdaysweek_n2i <- colSums(!
is.na(anysudscreen_no_ds1_vgdaysweek)) #Calculate n2i
ds1anysudscreen_meta <- data.frame(m1i =
anysudscreen_vgdaysweek_m1i, sd1i = anysudscreen_vgdaysweek_sd1i, n1i
= anysudscreen_vgdaysweek_n1i, m2i = anysudscreen_vgdaysweek_m2i,
sd2i = anysudscreen_vgdaysweek_sd2i, n2i =
anysudscreen_vgdaysweek_n2i) #MA dataframe
ds1anysudscreen_meta <- escalc(measure="MD", m1i = m1i, sd1i = sd1i,
n1i = n1i, m2i = m2i, sd2i = sd2i, n2i = n2i, data=ds1anysudscreen_meta)
#Calculate yi and vi
```

### #Study 2

```
anysudscreen_yes_ds2_vgdaysweek <- subset(anysudscreen_yes_ds2, select
= c(vgdaysweek)) #Subset 1i data
anysudscreen_vgdaysweek_m1i <-
apply(anysudscreen_yes_ds2_vgdaysweek, 2, mean) #Calculate m1i
anysudscreen_vgdaysweek_sd1i <-
apply(anysudscreen_yes_ds2_vgdaysweek, 2, sd) #Calculate sd1i
anysudscreen_vgdaysweek_n1i <- colSums(!
is.na(anysudscreen_yes_ds2_vgdaysweek)) #Calculate n1i
anysudscreen_no_ds2_vgdaysweek <- subset(anysudscreen_no_ds2, select =
c(vgdaysweek)) #Subset 2i data
anysudscreen_vgdaysweek_m2i <- apply(anysudscreen_no_ds2_vgdaysweek,
2, mean) #Calculate m2i
anysudscreen_vgdaysweek_sd2i <- apply(anysudscreen_no_ds2_vgdaysweek,
2, sd) #Calculate sd2i
anysudscreen_vgdaysweek_n2i <- colSums(!
```

```

is.na(anysudscreen_no_ds2_vgdaysweek)) #Calculate n2i
ds2anysudscreen_meta <- data.frame(m1i =
anysudscreen_vgdaysweek_m1i, sd1i = anysudscreen_vgdaysweek_sd1i, n1i
= anysudscreen_vgdaysweek_n1i, m2i = anysudscreen_vgdaysweek_m2i,
sd2i = anysudscreen_vgdaysweek_sd2i, n2i =
anysudscreen_vgdaysweek_n2i) #MA dataframe
ds2anysudscreen_meta <- escalc(measure="MD", m1i = m1i, sd1i = sd1i,
n1i = n1i, m2i = m2i, sd2i = sd2i, n2i = n2i, data=ds2anysudscreen_meta)
#Calculate yi and vi

#FE meta-analysis
(anysudscreen_meta <- rbind(ds1anysudscreen_meta,
ds2anysudscreen_meta))

##      m1i  sd1i n1i  m2i  sd2i n2i  yi  vi
## 1 5.112299 2.210242 187 4.932515 2.367811 163 0.1798 0.0605
## 2 4.724265 2.212277 272 4.722581 2.219465 310 0.0017 0.0339

(any_vgdaysweek_meta <- rma(yi=yi, vi=vi, measure="MD", method="FE",
data=anysudscreen_meta))

##
## Fixed-Effects Model (k = 2)
##
## Test for Heterogeneity:
## Q(df = 1) = 0.3360, p-val = 0.5621
##
## Model Results:
##
## estimate    se    zval    pval  ci.lb  ci.ub
## 0.0656  0.1474  0.4452  0.6562 -0.2233  0.3545
##
## ---
## Signif. codes:  0 '***' 0.001 '**' 0.01 '*' 0.05 '.' 0.1 ' ' 1

```

## AUD screen

### Replicated Effect

#### Hours per day

##### Study 1

```
(vghrsday_audit_ds1 <- t.test(vghrsday ~ audit, data=ds1))
```

```
##
## Welch Two Sample t-test
##
```

```
## data: vghrsday by audit
## t = 0.43577, df = 347.95, p-value = 0.6633
## alternative hypothesis: true difference in means is not equal to 0
## 95 percent confidence interval:
## -0.2875118 0.4511779
## sample estimates:
## mean in group 0 mean in group 1
## 2.346734 2.264901
```

## Study 2

```
(vghrsday_audit_ds2 <- t.test(vghrsday ~ audit, data=ds2))
```

```
##
## Welch Two Sample t-test
##
## data: vghrsday by audit
## t = 0.61131, df = 319.39, p-value = 0.5414
## alternative hypothesis: true difference in means is not equal to 0
## 95 percent confidence interval:
## -0.4032843 0.7668746
## sample estimates:
## mean in group 0 mean in group 1
## 3.595588 3.413793
```

## Hours per week

### Study 1

```
(vghrsweek_audit_ds1 <- t.test(vghrsweek ~ audit, data=ds1))
```

```
##
## Welch Two Sample t-test
##
## data: vghrsweek by audit
## t = 0.03389, df = 348, p-value = 0.973
## alternative hypothesis: true difference in means is not equal to 0
## 95 percent confidence interval:
## -2.719887 2.815264
## sample estimates:
## mean in group 0 mean in group 1
## 12.82915 12.78146
```

### Study 2

```
(vghrsweek_audit_ds2 <- t.test(vghrsweek ~ audit, data=ds2))
```



```
##
## Welch Two Sample t-test
##
## data: vghrsweek by audit
## t = 0.51384, df = 320.73, p-value = 0.6077
## alternative hypothesis: true difference in means is not equal to 0
## 95 percent confidence interval:
## -2.907697 4.963478
## sample estimates:
## mean in group 0 mean in group 1
## 18.67157 17.64368
```

## Days per week

### Study 1

```
(vgdaysweek_audit_ds1 <- t.test(vgdaysweek ~ audit, data=ds1))
```

```
##
## Welch Two Sample t-test
##
## data: vgdaysweek by audit
## t = -1.3703, df = 333.43, p-value = 0.1715
## alternative hypothesis: true difference in means is not equal to 0
## 95 percent confidence interval:
## -0.8137514 0.1455096
## sample estimates:
## mean in group 0 mean in group 1
## 4.884422 5.218543
```

### Study 2

```
(vgdaysweek_audit_ds2 <- t.test(vgdaysweek ~ audit, data=ds2))
```

```
##
## Welch Two Sample t-test
##
## data: vgdaysweek by audit
## t = -0.58516, df = 336.54, p-value = 0.5588
## alternative hypothesis: true difference in means is not equal to 0
## 95 percent confidence interval:
## -0.5053819 0.2736375
## sample estimates:
## mean in group 0 mean in group 1
## 4.688725 4.804598
```

## MD

### Hours per day

```
#Study 1
audit_yes_ds1_vghrsday <- subset(audit_yes_ds1, select = c(vghrsday))
#Subset 1i data
audit_vghrsday_m1i <- apply(audit_yes_ds1_vghrsday, 2, mean) #Calculate m1i
audit_vghrsday_sd1i <- apply(audit_yes_ds1_vghrsday, 2, sd) #Calculate sd1i
audit_vghrsday_n1i <- colSums(!is.na(audit_yes_ds1_vghrsday)) #Calculate n1i
audit_no_ds1_vghrsday <- subset(audit_no_ds1, select = c(vghrsday))
#Subset 2i data
audit_vghrsday_m2i <- apply(audit_no_ds1_vghrsday, 2, mean) #Calculate m2i
audit_vghrsday_sd2i <- apply(audit_no_ds1_vghrsday, 2, sd) #Calculate sd2i
audit_vghrsday_n2i <- colSums(!is.na(audit_no_ds1_vghrsday)) #Calculate n2i
ds1audit_meta <- data.frame(m1i = audit_vghrsday_m1i, sd1i =
audit_vghrsday_sd1i, n1i = audit_vghrsday_n1i, m2i = audit_vghrsday_m2i,
sd2i = audit_vghrsday_sd2i, n2i = audit_vghrsday_n2i) #MA dataframe
ds1audit_meta <- escalc(measure="MD", m1i = m1i, sd1i = sd1i, n1i = n1i,
m2i = m2i, sd2i = sd2i, n2i = n2i, data=ds1audit_meta) #Calculate yi and vi

#Study 2
audit_yes_ds2_vghrsday <- subset(audit_yes_ds2, select = c(vghrsday))
#Subset 1i data
audit_vghrsday_m1i <- apply(audit_yes_ds2_vghrsday, 2, mean) #Calculate m1i
audit_vghrsday_sd1i <- apply(audit_yes_ds2_vghrsday, 2, sd) #Calculate sd1i
audit_vghrsday_n1i <- colSums(!is.na(audit_yes_ds2_vghrsday)) #Calculate n1i
audit_no_ds2_vghrsday <- subset(audit_no_ds2, select = c(vghrsday))
#Subset 2i data
audit_vghrsday_m2i <- apply(audit_no_ds2_vghrsday, 2, mean) #Calculate m2i
audit_vghrsday_sd2i <- apply(audit_no_ds2_vghrsday, 2, sd) #Calculate sd2i
audit_vghrsday_n2i <- colSums(!is.na(audit_no_ds2_vghrsday)) #Calculate n2i
ds2audit_meta <- data.frame(m1i = audit_vghrsday_m1i, sd1i =
audit_vghrsday_sd1i, n1i = audit_vghrsday_n1i, m2i = audit_vghrsday_m2i,
sd2i = audit_vghrsday_sd2i, n2i = audit_vghrsday_n2i) #MA dataframe
ds2audit_meta <- escalc(measure="MD", m1i = m1i, sd1i = sd1i, n1i = n1i,
m2i = m2i, sd2i = sd2i, n2i = n2i, data=ds2audit_meta) #Calculate yi and vi

#FE meta-analysis
(audit_meta <- rbind(ds1audit_meta, ds2audit_meta))
```

```

##      m1i  sd1i n1i   m2i  sd2i n2i   yi  vi
## 1 2.264901 1.504225 151 2.346734 2.008914 199 -0.0818 0.0353
## 2 3.413793 3.308953 174 3.595588 3.226225 408 -0.1818 0.0884

(any_vghrsday_meta <- rma(yi=yi, vi=vi, measure="MD", method="FE",
data=audit_meta))

##
## Fixed-Effects Model (k = 2)
##
## Test for Heterogeneity:
## Q(df = 1) = 0.0808, p-val = 0.7762
##
## Model Results:
##
## estimate      se    zval    pval  ci.lb  ci.ub
## -0.1103  0.1588 -0.6949  0.4871 -0.4215  0.2009
##
## ---
## Signif. codes:  0 '***' 0.001 '**' 0.01 '*' 0.05 '.' 0.1 ' ' 1

```

## Hours per week

```

#Study 1
audit_yes_ds1_vghrsweek <- subset(audit_yes_ds1, select = c(vghrsweek))
#Subset 1i data
audit_vghrsweek_m1i <- apply(audit_yes_ds1_vghrsweek, 2, mean)
#Calculate m1i
audit_vghrsweek_sd1i <- apply(audit_yes_ds1_vghrsweek, 2, sd) #Calculate
sd1i
audit_vghrsweek_n1i <- colSums(!is.na(audit_yes_ds1_vghrsweek))
#Calculate n1i
audit_no_ds1_vghrsweek <- subset(audit_no_ds1, select = c(vghrsweek))
#Subset 2i data
audit_vghrsweek_m2i <- apply(audit_no_ds1_vghrsweek, 2, mean)
#Calculate m2i
audit_vghrsweek_sd2i <- apply(audit_no_ds1_vghrsweek, 2, sd) #Calculate
sd2i
audit_vghrsweek_n2i <- colSums(!is.na(audit_no_ds1_vghrsweek))
#Calculate n2i
ds1audit_meta <- data.frame(m1i = audit_vghrsweek_m1i, sd1i =
audit_vghrsweek_sd1i, n1i = audit_vghrsweek_n1i, m2i =
audit_vghrsweek_m2i, sd2i = audit_vghrsweek_sd2i, n2i =
audit_vghrsweek_n2i) #MA dataframe
ds1audit_meta <- escalc(measure="MD", m1i = m1i, sd1i = sd1i, n1i = n1i,
m2i = m2i, sd2i = sd2i, n2i = n2i, data=ds1audit_meta) #Calculate yi and vi

#Study 2
audit_yes_ds2_vghrsweek <- subset(audit_yes_ds2, select = c(vghrsweek))

```

```

#Subset 1i data
audit_vghrsweek_m1i <- apply(audit_yes_ds2_vghrsweek, 2, mean)
#Calculate m1i
audit_vghrsweek_sd1i <- apply(audit_yes_ds2_vghrsweek, 2, sd) #Calculate
sd1i
audit_vghrsweek_n1i <- colSums(!is.na(audit_yes_ds2_vghrsweek))
#Calculate n1i
audit_no_ds2_vghrsweek <- subset(audit_no_ds2, select = c(vghrsweek))
#Subset 2i data
audit_vghrsweek_m2i <- apply(audit_no_ds2_vghrsweek, 2, mean)
#Calculate m2i
audit_vghrsweek_sd2i <- apply(audit_no_ds2_vghrsweek, 2, sd) #Calculate
sd2i
audit_vghrsweek_n2i <- colSums(!is.na(audit_no_ds2_vghrsweek))
#Calculate n2i
ds2audit_meta <- data.frame(m1i = audit_vghrsweek_m1i, sd1i =
audit_vghrsweek_sd1i, n1i = audit_vghrsweek_n1i, m2i =
audit_vghrsweek_m2i, sd2i = audit_vghrsweek_sd2i, n2i =
audit_vghrsweek_n2i) #MA dataframe
ds2audit_meta <- escalc(measure="MD", m1i = m1i, sd1i = sd1i, n1i = n1i,
m2i = m2i, sd2i = sd2i, n2i = n2i, data=ds2audit_meta) #Calculate yi and vi

#FE meta-analysis
(audit_meta <- rbind(ds1audit_meta, ds2audit_meta))

##      m1i  sd1i n1i  m2i  sd2i n2i  yi  vi
## 1 12.78146 11.37476 151 12.82915 14.95046 199 -0.0477 1.9801
## 2 17.64368 22.22818 174 18.67157 21.77414 408 -1.0279 4.0017

(any_vghrsweek_meta <- rma(yi=yi, vi=vi, measure="MD", method="FE",
data=audit_meta))

##
## Fixed-Effects Model (k = 2)
##
## Test for Heterogeneity:
## Q(df = 1) = 0.1606, p-val = 0.6886
##
## Model Results:
##
## estimate      se    zval    pval  ci.lb  ci.ub
## -0.3722  1.1509 -0.3234  0.7464 -2.6279  1.8836
##
## ---
## Signif. codes:  0 '***' 0.001 '**' 0.01 '*' 0.05 '.' 0.1 ' ' 1

```

## Days per week

```

#Study 1
audit_yes_ds1_vgdaysweek <- subset(audit_yes_ds1, select =

```

```

c(vgdaysweek)) #Subset 1i data
audit_vgdaysweek_m1i <- apply(audit_yes_ds1_vgdaysweek, 2, mean)
#Calculate m1i
audit_vgdaysweek_sd1i <- apply(audit_yes_ds1_vgdaysweek, 2, sd)
#Calculate sd1i
audit_vgdaysweek_n1i <- colSums(!is.na(audit_yes_ds1_vgdaysweek))
#Calculate n1i
audit_no_ds1_vgdaysweek <- subset(audit_no_ds1, select = c(vgdaysweek))
#Subset 2i data
audit_vgdaysweek_m2i <- apply(audit_no_ds1_vgdaysweek, 2, mean)
#Calculate m2i
audit_vgdaysweek_sd2i <- apply(audit_no_ds1_vgdaysweek, 2, sd)
#Calculate sd2i
audit_vgdaysweek_n2i <- colSums(!is.na(audit_no_ds1_vgdaysweek))
#Calculate n2i
ds1audit_meta <- data.frame(m1i = audit_vgdaysweek_m1i, sd1i =
audit_vgdaysweek_sd1i, n1i = audit_vgdaysweek_n1i, m2i =
audit_vgdaysweek_m2i, sd2i = audit_vgdaysweek_sd2i, n2i =
audit_vgdaysweek_n2i) #MA dataframe
ds1audit_meta <- escalc(measure="MD", m1i = m1i, sd1i = sd1i, n1i = n1i,
m2i = m2i, sd2i = sd2i, n2i = n2i, data=ds1audit_meta) #Calculate yi and vi

#Study 2
audit_yes_ds2_vgdaysweek <- subset(audit_yes_ds2, select =
c(vgdaysweek)) #Subset 1i data
audit_vgdaysweek_m1i <- apply(audit_yes_ds2_vgdaysweek, 2, mean)
#Calculate m1i
audit_vgdaysweek_sd1i <- apply(audit_yes_ds2_vgdaysweek, 2, sd)
#Calculate sd1i
audit_vgdaysweek_n1i <- colSums(!is.na(audit_yes_ds2_vgdaysweek))
#Calculate n1i
audit_no_ds2_vgdaysweek <- subset(audit_no_ds2, select = c(vgdaysweek))
#Subset 2i data
audit_vgdaysweek_m2i <- apply(audit_no_ds2_vgdaysweek, 2, mean)
#Calculate m2i
audit_vgdaysweek_sd2i <- apply(audit_no_ds2_vgdaysweek, 2, sd)
#Calculate sd2i
audit_vgdaysweek_n2i <- colSums(!is.na(audit_no_ds2_vgdaysweek))
#Calculate n2i
ds2audit_meta <- data.frame(m1i = audit_vgdaysweek_m1i, sd1i =
audit_vgdaysweek_sd1i, n1i = audit_vgdaysweek_n1i, m2i =
audit_vgdaysweek_m2i, sd2i = audit_vgdaysweek_sd2i, n2i =
audit_vgdaysweek_n2i) #MA dataframe
ds2audit_meta <- escalc(measure="MD", m1i = m1i, sd1i = sd1i, n1i = n1i,
m2i = m2i, sd2i = sd2i, n2i = n2i, data=ds2audit_meta) #Calculate yi and vi

#FE meta-analysis
(audit_meta <- rbind(ds1audit_meta, ds2audit_meta))

```

```

##      m1i  sd1i n1i  m2i  sd2i n2i  yi  vi
## 1 5.218543 2.190568 151 4.884422 2.346652 199 0.3341 0.0595
## 2 4.804598 2.165623 174 4.688725 2.236325 408 0.1159 0.0392

(any_vgdaysweek_meta <- rma(yi=yi, vi=vi, measure="MD", method="FE",
data=audit_meta))

##
## Fixed-Effects Model (k = 2)
##
## Test for Heterogeneity:
## Q(df = 1) = 0.4828, p-val = 0.4872
##
## Model Results:
##
## estimate      se    zval    pval  ci.lb  ci.ub
## 0.2026  0.1537  1.3181  0.1875 -0.0987  0.5039
##
## ---
## Signif. codes:  0 '***' 0.001 '**' 0.01 '*' 0.05 '.' 0.1 ' ' 1

```

## Cannabis screen

### Replicated Effect

#### Hours per day

##### Study 1

```
(vghrsday_canscreen_ds1 <- t.test(vghrsday ~ canscreen, data=ds1))
```

```

##
## Welch Two Sample t-test
##
## data: vghrsday by canscreen
## t = 2.4308, df = 124.9, p-value = 0.01649
## alternative hypothesis: true difference in means is not equal to 0
## 95 percent confidence interval:
## 0.09212335 0.89950958
## sample estimates:
## mean in group 0 mean in group 1
##      2.403509      1.907692

```

##### Study 2

```
(vghrsday_canscreen_ds2 <- t.test(vghrsday ~ canscreen, data=ds2))
```

```
##
## Welch Two Sample t-test
##
## data: vghrsday by canscreen
## t = -1.4971, df = 161.89, p-value = 0.1363
## alternative hypothesis: true difference in means is not equal to 0
## 95 percent confidence interval:
## -1.3548808 0.1863906
## sample estimates:
## mean in group 0 mean in group 1
##      3.415755      4.000000
```

## Hours per week

### Study 1

```
(vghrsweek_canscreen_ds1 <- t.test(vghrsweek ~ canscreen, data=ds1))
```

```
##
## Welch Two Sample t-test
##
## data: vghrsweek by canscreen
## t = 1.9612, df = 127.83, p-value = 0.05204
## alternative hypothesis: true difference in means is not equal to 0
## 95 percent confidence interval:
## -0.02645986 5.94224934
## sample estimates:
## mean in group 0 mean in group 1
##      13.35789      10.40000
```

### Study 2

```
(vghrsweek_canscreen_ds2 <- t.test(vghrsweek ~ canscreen, data=ds2))
```

```
##
## Welch Two Sample t-test
##
## data: vghrsweek by canscreen
## t = -1.4103, df = 160.96, p-value = 0.1604
## alternative hypothesis: true difference in means is not equal to 0
## 95 percent confidence interval:
## -8.961668 1.494395
## sample estimates:
## mean in group 0 mean in group 1
##      17.56236      21.29600
```

## Days per week

### Study 1

```
(vgdaysweek_canscreen_ds1 <- t.test(vgdaysweek ~ canscreen, data=ds1))
```

```
##  
## Welch Two Sample t-test  
##  
## data: vgdaysweek by canscreen  
## t = -0.25413, df = 97.61, p-value = 0.7999  
## alternative hypothesis: true difference in means is not equal to 0  
## 95 percent confidence interval:  
## -0.6895237 0.5329785  
## sample estimates:  
## mean in group 0 mean in group 1  
## 5.014035 5.092308
```

### Study 2

```
(vgdaysweek_canscreen_ds2 <- t.test(vgdaysweek ~ canscreen, data=ds2))
```

```
##  
## Welch Two Sample t-test  
##  
## data: vgdaysweek by canscreen  
## t = -0.07094, df = 193.5, p-value = 0.9435  
## alternative hypothesis: true difference in means is not equal to 0  
## 95 percent confidence interval:  
## -0.4633574 0.4311824  
## sample estimates:  
## mean in group 0 mean in group 1  
## 4.719912 4.736000
```

## MD

### Hours per day

#### *#Study 1*

```
canscreen_yes_ds1_vghrsday <- subset(canscreen_yes_ds1, select =  
c(vghrsday)) #Subset 1i data  
canscreen_vghrsday_m1i <- apply(canscreen_yes_ds1_vghrsday, 2, mean)  
#Calculate m1i  
canscreen_vghrsday_sd1i <- apply(canscreen_yes_ds1_vghrsday, 2, sd)  
#Calculate sd1i  
canscreen_vghrsday_n1i <- colSums(!is.na(canscreen_yes_ds1_vghrsday))  
#Calculate n1i  
canscreen_no_ds1_vghrsday <- subset(canscreen_no_ds1, select =  
c(vghrsday)) #Subset 2i data
```



```

canscreen_vghrsday_m2i <- apply(canscreen_no_ds1_vghrsday, 2, mean)
#Calculate m2i
canscreen_vghrsday_sd2i <- apply(canscreen_no_ds1_vghrsday, 2, sd)
#Calculate sd2i
canscreen_vghrsday_n2i <- colSums(!is.na(canscreen_no_ds1_vghrsday))
#Calculate n2i
ds1canscreen_meta <- data.frame(m1i = canscreen_vghrsday_m1i, sd1i =
canscreen_vghrsday_sd1i, n1i = canscreen_vghrsday_n1i, m2i =
canscreen_vghrsday_m2i, sd2i = canscreen_vghrsday_sd2i, n2i =
canscreen_vghrsday_n2i) #MA dataframe
ds1canscreen_meta <- escalc(measure="MD", m1i = m1i, sd1i = sd1i, n1i =
n1i, m2i = m2i, sd2i = sd2i, n2i = n2i, data=ds1canscreen_meta) #Calculate
yi and vi

#Study 2
canscreen_yes_ds2_vghrsday <- subset(canscreen_yes_ds2, select =
c(vghrsday)) #Subset 1i data
canscreen_vghrsday_m1i <- apply(canscreen_yes_ds2_vghrsday, 2, mean)
#Calculate m1i
canscreen_vghrsday_sd1i <- apply(canscreen_yes_ds2_vghrsday, 2, sd)
#Calculate sd1i
canscreen_vghrsday_n1i <- colSums(!is.na(canscreen_yes_ds2_vghrsday))
#Calculate n1i
canscreen_no_ds2_vghrsday <- subset(canscreen_no_ds2, select =
c(vghrsday)) #Subset 2i data
canscreen_vghrsday_m2i <- apply(canscreen_no_ds2_vghrsday, 2, mean)
#Calculate m2i
canscreen_vghrsday_sd2i <- apply(canscreen_no_ds2_vghrsday, 2, sd)
#Calculate sd2i
canscreen_vghrsday_n2i <- colSums(!is.na(canscreen_no_ds2_vghrsday))
#Calculate n2i
ds2canscreen_meta <- data.frame(m1i = canscreen_vghrsday_m1i, sd1i =
canscreen_vghrsday_sd1i, n1i = canscreen_vghrsday_n1i, m2i =
canscreen_vghrsday_m2i, sd2i = canscreen_vghrsday_sd2i, n2i =
canscreen_vghrsday_n2i) #MA dataframe
ds2canscreen_meta <- escalc(measure="MD", m1i = m1i, sd1i = sd1i, n1i =
n1i, m2i = m2i, sd2i = sd2i, n2i = n2i, data=ds2canscreen_meta) #Calculate
yi and vi

#FE meta-analysis
(canscreen_meta <- rbind(ds1canscreen_meta, ds2canscreen_meta))

##      m1i  sd1i n1i  m2i  sd2i n2i  yi  vi
## 1 1.907692 1.377533 65 2.403509 1.880774 285 -0.4958 0.0416
## 2 4.000000 4.075893 125 3.415755 2.976887 457 0.5842 0.1523

(any_vghrsday_meta <- rma(yi=yi, vi=vi, measure="MD", method="FE",
data=canscreen_meta))

##
## Fixed-Effects Model (k = 2)

```

```
##
## Test for Heterogeneity:
## Q(df = 1) = 6.0162, p-val = 0.0142
##
## Model Results:
##
## estimate      se      zval      pval      ci.lb      ci.ub
## -0.2641      0.1808     -1.4608     0.1441     -0.6184     0.0902
##
## ---
## Signif. codes:  0 '***' 0.001 '**' 0.01 '*' 0.05 '.' 0.1 ' ' 1
```

## Hours per week

### *#Study 1*

```
canscreen_yes_ds1_vghrsweek <- subset(canscreen_yes_ds1, select =
c(vghrsweek)) #Subset 1i data
canscreen_vghrsweek_m1i <- apply(canscreen_yes_ds1_vghrsweek, 2, mean)
#Calculate m1i
canscreen_vghrsweek_sd1i <- apply(canscreen_yes_ds1_vghrsweek, 2, sd)
#Calculate sd1i
canscreen_vghrsweek_n1i <- colSums(!is.na(canscreen_yes_ds1_vghrsweek))
#Calculate n1i
canscreen_no_ds1_vghrsweek <- subset(canscreen_no_ds1, select =
c(vghrsweek)) #Subset 2i data
canscreen_vghrsweek_m2i <- apply(canscreen_no_ds1_vghrsweek, 2, mean)
#Calculate m2i
canscreen_vghrsweek_sd2i <- apply(canscreen_no_ds1_vghrsweek, 2, sd)
#Calculate sd2i
canscreen_vghrsweek_n2i <- colSums(!is.na(canscreen_no_ds1_vghrsweek))
#Calculate n2i
ds1canscreen_meta <- data.frame(m1i = canscreen_vghrsweek_m1i, sd1i =
canscreen_vghrsweek_sd1i, n1i = canscreen_vghrsweek_n1i, m2i =
canscreen_vghrsweek_m2i, sd2i = canscreen_vghrsweek_sd2i, n2i =
canscreen_vghrsweek_n2i) #MA dataframe
ds1canscreen_meta <- escalc(measure="MD", m1i = m1i, sd1i = sd1i, n1i =
n1i, m2i = m2i, sd2i = sd2i, n2i = n2i, data=ds1canscreen_meta) #Calculate
yi and vi
```

### *#Study 2*

```
canscreen_yes_ds2_vghrsweek <- subset(canscreen_yes_ds2, select =
c(vghrsweek)) #Subset 1i data
canscreen_vghrsweek_m1i <- apply(canscreen_yes_ds2_vghrsweek, 2, mean)
#Calculate m1i
canscreen_vghrsweek_sd1i <- apply(canscreen_yes_ds2_vghrsweek, 2, sd)
#Calculate sd1i
canscreen_vghrsweek_n1i <- colSums(!is.na(canscreen_yes_ds2_vghrsweek))
#Calculate n1i
canscreen_no_ds2_vghrsweek <- subset(canscreen_no_ds2, select =
```

```

c(vghrsweek)) #Subset 2i data
canscreen_vghrsweek_m2i <- apply(canscreen_no_ds2_vghrsweek, 2, mean)
#Calculate m2i
canscreen_vghrsweek_sd2i <- apply(canscreen_no_ds2_vghrsweek, 2, sd)
#Calculate sd2i
canscreen_vghrsweek_n2i <- colSums(!is.na(canscreen_no_ds2_vghrsweek))
#Calculate n2i
ds2canscreen_meta <- data.frame(m1i = canscreen_vghrsweek_m1i, sd1i =
canscreen_vghrsweek_sd1i, n1i = canscreen_vghrsweek_n1i, m2i =
canscreen_vghrsweek_m2i, sd2i = canscreen_vghrsweek_sd2i, n2i =
canscreen_vghrsweek_n2i) #MA dataframe
ds2canscreen_meta <- escalc(measure="MD", m1i = m1i, sd1i = sd1i, n1i =
n1i, m2i = m2i, sd2i = sd2i, n2i = n2i, data=ds2canscreen_meta) #Calculate
yi and vi

#FE meta-analysis
(canscreen_meta <- rbind(ds1canscreen_meta, ds2canscreen_meta))

##      m1i      sd1i n1i      m2i      sd2i n2i      yi      vi
## 1 10.400 10.11774 65 13.35789 14.12339 285 -2.9579 2.2748
## 2 21.296 27.69157 125 17.56236 19.98445 457 3.7336 7.0085

(any_vghrsweek_meta <- rma(yi=yi, vi=vi, measure="MD", method="FE",
data=canscreen_meta))

##
## Fixed-Effects Model (k = 2)
##
## Test for Heterogeneity:
## Q(df = 1) = 4.8234, p-val = 0.0281
##
## Model Results:
##
## estimate      se      zval      pval      ci.lb      ci.ub
## -1.3182      1.3105     -1.0059     0.3145     -3.8867      1.2503
##
## ---
## Signif. codes:  0 '***' 0.001 '**' 0.01 '*' 0.05 '.' 0.1 ' ' 1

```

## Days per week

```

#Study 1
canscreen_yes_ds1_vgdaysweek <- subset(canscreen_yes_ds1, select =
c(vgdaysweek)) #Subset 1i data
canscreen_vgdaysweek_m1i <- apply(canscreen_yes_ds1_vgdaysweek, 2,
mean) #Calculate m1i
canscreen_vgdaysweek_sd1i <- apply(canscreen_yes_ds1_vgdaysweek, 2, sd)
#Calculate sd1i
canscreen_vgdaysweek_n1i <- colSums(!
is.na(canscreen_yes_ds1_vgdaysweek)) #Calculate n1i

```

```

canscreen_no_ds1_vgdaysweek <- subset(canscreen_no_ds1, select =
c(vgdaysweek)) #Subset 2i data
canscreen_vgdaysweek_m2i <- apply(canscreen_no_ds1_vgdaysweek, 2,
mean) #Calculate m2i
canscreen_vgdaysweek_sd2i <- apply(canscreen_no_ds1_vgdaysweek, 2, sd)
#Calculate sd2i
canscreen_vgdaysweek_n2i <- colSums(!
is.na(canscreen_no_ds1_vgdaysweek)) #Calculate n2i
ds1canscreen_meta <- data.frame(m1i = canscreen_vgdaysweek_m1i, sd1i =
canscreen_vgdaysweek_sd1i, n1i = canscreen_vgdaysweek_n1i, m2i =
canscreen_vgdaysweek_m2i, sd2i = canscreen_vgdaysweek_sd2i, n2i =
canscreen_vgdaysweek_n2i) #MA dataframe
ds1canscreen_meta <- escalc(measure="MD", m1i = m1i, sd1i = sd1i, n1i =
n1i, m2i = m2i, sd2i = sd2i, n2i = n2i, data=ds1canscreen_meta) #Calculate
yi and vi

#Study 2
canscreen_yes_ds2_vgdaysweek <- subset(canscreen_yes_ds2, select =
c(vgdaysweek)) #Subset 1i data
canscreen_vgdaysweek_m1i <- apply(canscreen_yes_ds2_vgdaysweek, 2,
mean) #Calculate m1i
canscreen_vgdaysweek_sd1i <- apply(canscreen_yes_ds2_vgdaysweek, 2, sd)
#Calculate sd1i
canscreen_vgdaysweek_n1i <- colSums(!
is.na(canscreen_yes_ds2_vgdaysweek)) #Calculate n1i
canscreen_no_ds2_vgdaysweek <- subset(canscreen_no_ds2, select =
c(vgdaysweek)) #Subset 2i data
canscreen_vgdaysweek_m2i <- apply(canscreen_no_ds2_vgdaysweek, 2,
mean) #Calculate m2i
canscreen_vgdaysweek_sd2i <- apply(canscreen_no_ds2_vgdaysweek, 2, sd)
#Calculate sd2i
canscreen_vgdaysweek_n2i <- colSums(!
is.na(canscreen_no_ds2_vgdaysweek)) #Calculate n2i
ds2canscreen_meta <- data.frame(m1i = canscreen_vgdaysweek_m1i, sd1i =
canscreen_vgdaysweek_sd1i, n1i = canscreen_vgdaysweek_n1i, m2i =
canscreen_vgdaysweek_m2i, sd2i = canscreen_vgdaysweek_sd2i, n2i =
canscreen_vgdaysweek_n2i) #MA dataframe
ds2canscreen_meta <- escalc(measure="MD", m1i = m1i, sd1i = sd1i, n1i =
n1i, m2i = m2i, sd2i = sd2i, n2i = n2i, data=ds2canscreen_meta) #Calculate
yi and vi

#FE meta-analysis
(canscreen_meta <- rbind(ds1canscreen_meta, ds2canscreen_meta))

##      m1i  sd1i n1i   m2i  sd2i n2i   yi   vi
## 1 5.092308 2.227127 65 5.014035 2.299681 285 0.0783 0.0949
## 2 4.736000 2.258118 125 4.719912 2.204535 457 0.0161 0.0514

(any_vgdaysweek_meta <- rma(yi=yi, vi=vi, measure="MD", method="FE",
data=canscreen_meta))

```

```

##
## Fixed-Effects Model (k = 2)
##
## Test for Heterogeneity:
## Q(df = 1) = 0.0264, p-val = 0.8708
##
## Model Results:
##
## estimate      se    zval    pval  ci.lb  ci.ub
## 0.0379  0.1826  0.2078  0.8354 -0.3200  0.3959
##
## ---
## Signif. codes:  0 '***' 0.001 '**' 0.01 '*' 0.05 '.' 0.1 ' ' 1

```

## Any care - Discharge

### Replicated Effect

#### Hours per day

##### Study 1

```
(vghrsday_anycaredis_ds1 <- t.test(vghrsday ~ anydis, data=ds1anyscreen))
```

```

##
## Welch Two Sample t-test
##
## data: vghrsday by anydis
## t = -0.53622, df = 246.36, p-value = 0.5923
## alternative hypothesis: true difference in means is not equal to 0
## 95 percent confidence interval:
## -0.5451046  0.3118150
## sample estimates:
## mean in group 0 mean in group 1
##      2.311927      2.428571

```

##### Study 2

```
(vghrsday_anycaredis_ds2 <- t.test(vghrsday ~ anydis, data=ds2anyscreen))
```

```

##
## Welch Two Sample t-test
##
## data: vghrsday by anydis
## t = -2.1194, df = 383.45, p-value = 0.0347
## alternative hypothesis: true difference in means is not equal to 0
## 95 percent confidence interval:

```

```
## -1.27870365 -0.04794729
## sample estimates:
## mean in group 0 mean in group 1
## 3.201258 3.864583
```

## Hours per week

### Study 1

```
(vghrsweek_anycaredis_ds1 <- t.test(vghrsweek ~ anydis,
data=ds1anyscreen))
```

```
##
## Welch Two Sample t-test
##
## data: vghrsweek by anydis
## t = -0.54127, df = 243.38, p-value = 0.5888
## alternative hypothesis: true difference in means is not equal to 0
## 95 percent confidence interval:
## -4.143338 2.357087
## sample estimates:
## mean in group 0 mean in group 1
## 12.89908 13.79221
```

### Study 2

```
(vghrsweek_anycaredis_ds2 <- t.test(vghrsweek ~ anydis,
data=ds2anyscreen))
```

```
##
## Welch Two Sample t-test
##
## data: vghrsweek by anydis
## t = -2.6404, df = 400.5, p-value = 0.008604
## alternative hypothesis: true difference in means is not equal to 0
## 95 percent confidence interval:
## -9.577712 -1.402503
## sample estimates:
## mean in group 0 mean in group 1
## 15.47170 20.96181
```

## Days per week

### Study 1

```
(vgdaysweek_anycaredis_ds1 <- t.test(vgdaysweek ~ anydis,
data=ds1anyscreen))
```

```
##
## Welch Two Sample t-test
##
## data: vgdaysweek by anydis
## t = -0.92016, df = 231.08, p-value = 0.3585
## alternative hypothesis: true difference in means is not equal to 0
## 95 percent confidence interval:
## -0.8074883 0.2933694
## sample estimates:
## mean in group 0 mean in group 1
##      5.009174      5.266234
```

## Study 2

```
(vgdaysweek_anycaredis_ds2 <- t.test(vgdaysweek ~ anydis,
data=ds2anyscreen))
```

```
##
## Welch Two Sample t-test
##
## data: vgdaysweek by anydis
## t = -2.8132, df = 308.79, p-value = 0.005219
## alternative hypothesis: true difference in means is not equal to 0
## 95 percent confidence interval:
## -1.0511242 -0.1859041
## sample estimates:
## mean in group 0 mean in group 1
##      4.371069      4.989583
```

## MD

### Hours per day

```
#Study 1
anycaredis_yes_ds1_vghrsday <- subset(anycaredis_yes_ds1, select =
c(vghrsday)) #Subset 1i data
anycaredis_vghrsday_m1i <- apply(anycaredis_yes_ds1_vghrsday, 2, mean)
#Calculate m1i
anycaredis_vghrsday_sd1i <- apply(anycaredis_yes_ds1_vghrsday, 2, sd)
#Calculate sd1i
anycaredis_vghrsday_n1i <- colSums(!is.na(anycaredis_yes_ds1_vghrsday))
#Calculate n1i
anycaredis_no_ds1_vghrsday <- subset(anycaredis_no_ds1, select =
c(vghrsday)) #Subset 2i data
anycaredis_vghrsday_m2i <- apply(anycaredis_no_ds1_vghrsday, 2, mean)
#Calculate m2i
anycaredis_vghrsday_sd2i <- apply(anycaredis_no_ds1_vghrsday, 2, sd)
#Calculate sd2i
```

```

anycaredis_vghrsday_n2i <- colSums(!is.na(anycaredis_no_ds1_vghrsday))
#Calculate n2i
ds1anycaredis_meta <- data.frame(m1i = anycaredis_vghrsday_m1i, sd1i =
anycaredis_vghrsday_sd1i, n1i = anycaredis_vghrsday_n1i, m2i =
anycaredis_vghrsday_m2i, sd2i = anycaredis_vghrsday_sd2i, n2i =
anycaredis_vghrsday_n2i) #MA dataframe
ds1anycaredis_meta <- escalc(measure="MD", m1i = m1i, sd1i = sd1i, n1i =
n1i, m2i = m2i, sd2i = sd2i, n2i = n2i, data=ds1anycaredis_meta)
#Calculate yi and vi

#Study 2
anycaredis_yes_ds2_vghrsday <- subset(anycaredis_yes_ds2, select =
c(vghrsday)) #Subset 1i data
anycaredis_vghrsday_m1i <- apply(anycaredis_yes_ds2_vghrsday, 2, mean)
#Calculate m1i
anycaredis_vghrsday_sd1i <- apply(anycaredis_yes_ds2_vghrsday, 2, sd)
#Calculate sd1i
anycaredis_vghrsday_n1i <- colSums(!is.na(anycaredis_yes_ds2_vghrsday))
#Calculate n1i
anycaredis_no_ds2_vghrsday <- subset(anycaredis_no_ds2, select =
c(vghrsday)) #Subset 2i data
anycaredis_vghrsday_m2i <- apply(anycaredis_no_ds2_vghrsday, 2, mean)
#Calculate m2i
anycaredis_vghrsday_sd2i <- apply(anycaredis_no_ds2_vghrsday, 2, sd)
#Calculate sd2i
anycaredis_vghrsday_n2i <- colSums(!is.na(anycaredis_no_ds2_vghrsday))
#Calculate n2i
ds2anycaredis_meta <- data.frame(m1i = anycaredis_vghrsday_m1i, sd1i =
anycaredis_vghrsday_sd1i, n1i = anycaredis_vghrsday_n1i, m2i =
anycaredis_vghrsday_m2i, sd2i = anycaredis_vghrsday_sd2i, n2i =
anycaredis_vghrsday_n2i) #MA dataframe
ds2anycaredis_meta <- escalc(measure="MD", m1i = m1i, sd1i = sd1i, n1i =
n1i, m2i = m2i, sd2i = sd2i, n2i = n2i, data=ds2anycaredis_meta)
#Calculate yi and vi

#FE meta-analysis
(anycaredis_meta <- rbind(ds1anycaredis_meta, ds2anycaredis_meta))

##      m1i  sd1i n1i  m2i  sd2i n2i  yi  vi
## 1 2.428571 1.843048 154 2.311927 1.659413 109 0.1166 0.0473
## 2 3.864583 3.575818 288 3.201258 2.918253 159 0.6633 0.0980

(anycaredis_vghrsday_meta <- rma(yi=yi, vi=vi, measure="MD",
method="FE", data=anycaredis_meta))

##
## Fixed-Effects Model (k = 2)
##
## Test for Heterogeneity:
## Q(df = 1) = 2.0571, p-val = 0.1515
##

```



```
## Model Results:
##
## estimate    se    zval    pval    ci.lb    ci.ub
## 0.2947 0.1786 1.6499 0.0990 -0.0554 0.6448
##
## ---
## Signif. codes: 0 '***' 0.001 '**' 0.01 '*' 0.05 '.' 0.1 ' ' 1
```

## Hours per week

```
#Study 1
anycaredis_yes_ds1_vghrsweek <- subset(anycaredis_yes_ds1, select =
c(vghrsweek)) #Subset 1i data
anycaredis_vghrsweek_m1i <- apply(anycaredis_yes_ds1_vghrsweek, 2,
mean) #Calculate m1i
anycaredis_vghrsweek_sd1i <- apply(anycaredis_yes_ds1_vghrsweek, 2, sd)
#Calculate sd1i
anycaredis_vghrsweek_n1i <- colSums(!
is.na(anycaredis_yes_ds1_vghrsweek)) #Calculate n1i
anycaredis_no_ds1_vghrsweek <- subset(anycaredis_no_ds1, select =
c(vghrsweek)) #Subset 2i data
anycaredis_vghrsweek_m2i <- apply(anycaredis_no_ds1_vghrsweek, 2, mean)
#Calculate m2i
anycaredis_vghrsweek_sd2i <- apply(anycaredis_no_ds1_vghrsweek, 2, sd)
#Calculate sd2i
anycaredis_vghrsweek_n2i <- colSums(!is.na(anycaredis_no_ds1_vghrsweek))
#Calculate n2i
ds1anycaredis_meta <- data.frame(m1i = anycaredis_vghrsweek_m1i, sd1i =
anycaredis_vghrsweek_sd1i, n1i = anycaredis_vghrsweek_n1i, m2i =
anycaredis_vghrsweek_m2i, sd2i = anycaredis_vghrsweek_sd2i, n2i =
anycaredis_vghrsweek_n2i) #MA dataframe
ds1anycaredis_meta <- escalc(measure="MD", m1i = m1i, sd1i = sd1i, n1i =
n1i, m2i = m2i, sd2i = sd2i, n2i = n2i, data=ds1anycaredis_meta)
#Calculate yi and vi
```

```
#Study 2
anycaredis_yes_ds2_vghrsweek <- subset(anycaredis_yes_ds2, select =
c(vghrsweek)) #Subset 1i data
anycaredis_vghrsweek_m1i <- apply(anycaredis_yes_ds2_vghrsweek, 2,
mean) #Calculate m1i
anycaredis_vghrsweek_sd1i <- apply(anycaredis_yes_ds2_vghrsweek, 2, sd)
#Calculate sd1i
anycaredis_vghrsweek_n1i <- colSums(!
is.na(anycaredis_yes_ds2_vghrsweek)) #Calculate n1i
anycaredis_no_ds2_vghrsweek <- subset(anycaredis_no_ds2, select =
c(vghrsweek)) #Subset 2i data
anycaredis_vghrsweek_m2i <- apply(anycaredis_no_ds2_vghrsweek, 2, mean)
#Calculate m2i
anycaredis_vghrsweek_sd2i <- apply(anycaredis_no_ds2_vghrsweek, 2, sd)
```

```

#Calculate sd2i
anycaredis_vghrsweek_n2i <- colSums(!is.na(anycaredis_no_ds2_vghrsweek))
#Calculate n2i
ds2anycaredis_meta <- data.frame(m1i = anycaredis_vghrsweek_m1i, sd1i =
anycaredis_vghrsweek_sd1i, n1i = anycaredis_vghrsweek_n1i, m2i =
anycaredis_vghrsweek_m2i, sd2i = anycaredis_vghrsweek_sd2i, n2i =
anycaredis_vghrsweek_n2i) #MA dataframe
ds2anycaredis_meta <- escalc(measure="MD", m1i = m1i, sd1i = sd1i, n1i =
n1i, m2i = m2i, sd2i = sd2i, n2i = n2i, data=ds2anycaredis_meta)
#Calculate yi and vi

#FE meta-analysis
(anycaredis_meta <- rbind(ds1anycaredis_meta, ds2anycaredis_meta))

##      m1i  sd1i n1i  m2i  sd2i n2i  yi  vi
## 1 13.79221 13.79243 154 12.89908 12.73297 109 0.8931 2.7227
## 2 20.96181 24.58510 288 15.47170 18.80709 159 5.4901 4.3233

(anycaredis_vghrsweek_meta <- rma(yi=yi, vi=vi, measure="MD",
method="FE", data=anycaredis_meta))

##
## Fixed-Effects Model (k = 2)
##
## Test for Heterogeneity:
## Q(df = 1) = 2.9992, p-val = 0.0833
##
## Model Results:
##
## estimate    se    zval    pval  ci.lb  ci.ub
## 2.6695  1.2925  2.0653  0.0389  0.1362  5.2028  *
##
## ---
## Signif. codes:  0 '***' 0.001 '**' 0.01 '*' 0.05 '.' 0.1 ' ' 1

```

## Days per week

```

#Study 1
anycaredis_yes_ds1_vgdaysweek <- subset(anycaredis_yes_ds1, select =
c(vgdaysweek)) #Subset 1i data
anycaredis_vgdaysweek_m1i <- apply(anycaredis_yes_ds1_vgdaysweek, 2,
mean) #Calculate m1i
anycaredis_vgdaysweek_sd1i <- apply(anycaredis_yes_ds1_vgdaysweek, 2,
sd) #Calculate sd1i
anycaredis_vgdaysweek_n1i <- colSums(!
is.na(anycaredis_yes_ds1_vgdaysweek)) #Calculate n1i
anycaredis_no_ds1_vgdaysweek <- subset(anycaredis_no_ds1, select =
c(vgdaysweek)) #Subset 2i data
anycaredis_vgdaysweek_m2i <- apply(anycaredis_no_ds1_vgdaysweek, 2,
mean) #Calculate m2i

```

```

anycaredis_vgdaysweek_sd2i <- apply(anycaredis_no_ds1_vgdaysweek, 2,
sd) #Calculate sd2i
anycaredis_vgdaysweek_n2i <- colSums(!
is.na(anycaredis_no_ds1_vgdaysweek)) #Calculate n2i
ds1anycaredis_meta <- data.frame(m1i = anycaredis_vgdaysweek_m1i, sd1i
= anycaredis_vgdaysweek_sd1i, n1i = anycaredis_vgdaysweek_n1i, m2i =
anycaredis_vgdaysweek_m2i, sd2i = anycaredis_vgdaysweek_sd2i, n2i =
anycaredis_vgdaysweek_n2i) #MA dataframe
ds1anycaredis_meta <- escalc(measure="MD", m1i = m1i, sd1i = sd1i, n1i =
n1i, m2i = m2i, sd2i = sd2i, n2i = n2i, data=ds1anycaredis_meta)
#Calculate yi and vi

#Study 2
anycaredis_yes_ds2_vgdaysweek <- subset(anycaredis_yes_ds2, select =
c(vgdaysweek)) #Subset 1i data
anycaredis_vgdaysweek_m1i <- apply(anycaredis_yes_ds2_vgdaysweek, 2,
mean) #Calculate m1i
anycaredis_vgdaysweek_sd1i <- apply(anycaredis_yes_ds2_vgdaysweek, 2,
sd) #Calculate sd1i
anycaredis_vgdaysweek_n1i <- colSums(!
is.na(anycaredis_yes_ds2_vgdaysweek)) #Calculate n1i
anycaredis_no_ds2_vgdaysweek <- subset(anycaredis_no_ds2, select =
c(vgdaysweek)) #Subset 2i data
anycaredis_vgdaysweek_m2i <- apply(anycaredis_no_ds2_vgdaysweek, 2,
mean) #Calculate m2i
anycaredis_vgdaysweek_sd2i <- apply(anycaredis_no_ds2_vgdaysweek, 2,
sd) #Calculate sd2i
anycaredis_vgdaysweek_n2i <- colSums(!
is.na(anycaredis_no_ds2_vgdaysweek)) #Calculate n2i
ds2anycaredis_meta <- data.frame(m1i = anycaredis_vgdaysweek_m1i, sd1i
= anycaredis_vgdaysweek_sd1i, n1i = anycaredis_vgdaysweek_n1i, m2i =
anycaredis_vgdaysweek_m2i, sd2i = anycaredis_vgdaysweek_sd2i, n2i =
anycaredis_vgdaysweek_n2i) #MA dataframe
ds2anycaredis_meta <- escalc(measure="MD", m1i = m1i, sd1i = sd1i, n1i =
n1i, m2i = m2i, sd2i = sd2i, n2i = n2i, data=ds2anycaredis_meta)
#Calculate yi and vi

#FE meta-analysis
(anycaredis_meta <- rbind(ds1anycaredis_meta, ds2anycaredis_meta))

##      m1i  sd1i n1i  m2i  sd2i n2i  yi  vi
## 1 5.266234 2.217112 154 5.009174 2.242252 109 0.2571 0.0780
## 2 4.989583 2.133986 288 4.371069 2.274107 159 0.6185 0.0483

(anycaredis_vgdaysweek_meta <- rma(yi=yi, vi=vi, measure="MD",
method="FE", data=anycaredis_meta))

##
## Fixed-Effects Model (k = 2)
##
## Test for Heterogeneity:

```

```
## Q(df = 1) = 1.0338, p-val = 0.3093
##
## Model Results:
##
## estimate      se      zval      pval      ci.lb      ci.ub
## 0.4803 0.1728 2.7798 0.0054 0.1416 0.8189 **
## ---
## Signif. codes: 0 '***' 0.001 '**' 0.01 '*' 0.05 '.' 0.1 ' ' 1
```

## Any care - Year

### Replicated Effect

#### Hours per day

##### Study 1

```
(vghrsday_ancareyear_ds1 <- t.test(vghrsday ~ anyyear,
data=ds1anyscreen))
```

```
##
## Welch Two Sample t-test
##
## data: vghrsday by anyyear
## t = 0.82714, df = 220.22, p-value = 0.4091
## alternative hypothesis: true difference in means is not equal to 0
## 95 percent confidence interval:
## -0.2534314 0.6200125
## sample estimates:
## mean in group 0 mean in group 1
## 2.450617 2.267327
```

##### Study 2

```
(vghrsday_ancareyear_ds2 <- t.test(vghrsday ~ anyyear,
data=ds2anyscreen))
```

```
##
## Welch Two Sample t-test
##
## data: vghrsday by anyyear
## t = -1.6325, df = 404.16, p-value = 0.1034
## alternative hypothesis: true difference in means is not equal to 0
## 95 percent confidence interval:
## -1.1610420 0.1075661
## sample estimates:
```

```
## mean in group 0 mean in group 1
##    3.382353    3.909091
```

## Hours per week

### Study 1

```
(vghrsweek_anycareyear_ds1 <- t.test(vghrsweek ~ anyyear,
data=ds1anyscreen))
```

```
##
## Welch Two Sample t-test
##
## data: vghrsweek by anyyear
## t = 0.9737, df = 225.04, p-value = 0.3312
## alternative hypothesis: true difference in means is not equal to 0
## 95 percent confidence interval:
## -1.655933  4.890868
## sample estimates:
## mean in group 0 mean in group 1
##    14.04321    12.42574
```

### Study 2

```
(vghrsweek_anycareyear_ds2 <- t.test(vghrsweek ~ anyyear,
data=ds2anyscreen))
```

```
##
## Welch Two Sample t-test
##
## data: vghrsweek by anyyear
## t = -1.6053, df = 400.13, p-value = 0.1092
## alternative hypothesis: true difference in means is not equal to 0
## 95 percent confidence interval:
## -7.8192419  0.7895688
## sample estimates:
## mean in group 0 mean in group 1
##    17.36555    20.88038
```

## Days per week

### Study 1

```
(vgdaysweek_anycareyear_ds1 <- t.test(vgdaysweek ~ anyyear,
data=ds1anyscreen))
```

```
##
## Welch Two Sample t-test
```

```
##
## data: vgdaysweek by anyyear
## t = 0.12071, df = 210.66, p-value = 0.904
## alternative hypothesis: true difference in means is not equal to 0
## 95 percent confidence interval:
## -0.5247097 0.5931610
## sample estimates:
## mean in group 0 mean in group 1
##      5.172840      5.138614
```

## Study 2

```
(vgdaysweek_anycareyear_ds2 <- t.test(vgdaysweek ~ anyyear,
data=ds2anyscreen))
```

```
##
## Welch Two Sample t-test
##
## data: vgdaysweek by anyyear
## t = -1.2168, df = 442.3, p-value = 0.2243
## alternative hypothesis: true difference in means is not equal to 0
## 95 percent confidence interval:
## -0.6617582 0.1556667
## sample estimates:
## mean in group 0 mean in group 1
##      4.651261      4.904306
```

## MD

### Hours per day

#### *#Study 1*

```
anycareyear_yes_ds1_vghrsday <- subset(anycareyear_yes_ds1, select =
c(vghrsday)) #Subset 1i data
anycareyear_vghrsday_m1i <- apply(anycareyear_yes_ds1_vghrsday, 2,
mean) #Calculate m1i
anycareyear_vghrsday_sd1i <- apply(anycareyear_yes_ds1_vghrsday, 2, sd)
#Calculate sd1i
anycareyear_vghrsday_n1i <- colSums(!
is.na(anycareyear_yes_ds1_vghrsday)) #Calculate n1i
anycareyear_no_ds1_vghrsday <- subset(anycareyear_no_ds1, select =
c(vghrsday)) #Subset 2i data
anycareyear_vghrsday_m2i <- apply(anycareyear_no_ds1_vghrsday, 2,
mean) #Calculate m2i
anycareyear_vghrsday_sd2i <- apply(anycareyear_no_ds1_vghrsday, 2, sd)
#Calculate sd2i
anycareyear_vghrsday_n2i <- colSums(!is.na(anycareyear_no_ds1_vghrsday))
#Calculate n2i
```

```

ds1anycareyear_meta <- data.frame(m1i = anycareyear_vghrsday_m1i, sd1i = anycareyear_vghrsday_sd1i, n1i = anycareyear_vghrsday_n1i, m2i = anycareyear_vghrsday_m2i, sd2i = anycareyear_vghrsday_sd2i, n2i = anycareyear_vghrsday_n2i) #MA dataframe
ds1anycareyear_meta <- escalc(measure="MD", m1i = m1i, sd1i = sd1i, n1i = n1i, m2i = m2i, sd2i = sd2i, n2i = n2i, data=ds1anycareyear_meta)
#Calculate yi and vi

#Study 2
anycareyear_yes_ds2_vghrsday <- subset(anycareyear_yes_ds2, select = c(vghrsday)) #Subset 1i data
anycareyear_vghrsday_m1i <- apply(anycareyear_yes_ds2_vghrsday, 2, mean) #Calculate m1i
anycareyear_vghrsday_sd1i <- apply(anycareyear_yes_ds2_vghrsday, 2, sd) #Calculate sd1i
anycareyear_vghrsday_n1i <- colSums(!is.na(anycareyear_yes_ds2_vghrsday)) #Calculate n1i
anycareyear_no_ds2_vghrsday <- subset(anycareyear_no_ds2, select = c(vghrsday)) #Subset 2i data
anycareyear_vghrsday_m2i <- apply(anycareyear_no_ds2_vghrsday, 2, mean) #Calculate m2i
anycareyear_vghrsday_sd2i <- apply(anycareyear_no_ds2_vghrsday, 2, sd) #Calculate sd2i
anycareyear_vghrsday_n2i <- colSums(!is.na(anycareyear_no_ds2_vghrsday)) #Calculate n2i
ds2anycareyear_meta <- data.frame(m1i = anycareyear_vghrsday_m1i, sd1i = anycareyear_vghrsday_sd1i, n1i = anycareyear_vghrsday_n1i, m2i = anycareyear_vghrsday_m2i, sd2i = anycareyear_vghrsday_sd2i, n2i = anycareyear_vghrsday_n2i) #MA dataframe
ds2anycareyear_meta <- escalc(measure="MD", m1i = m1i, sd1i = sd1i, n1i = n1i, m2i = m2i, sd2i = sd2i, n2i = n2i, data=ds2anycareyear_meta)
#Calculate yi and vi

#FE meta-analysis
(anycareyear_meta <- rbind(ds1anycareyear_meta, ds2anycareyear_meta))

##      m1i  sd1i n1i  m2i  sd2i n2i  yi  vi
## 1 2.267327 1.714008 101 2.450617 1.800802 162 -0.1833 0.0491
## 2 3.909091 3.690732 209 3.382353 3.044124 238 0.5267 0.1041

(anycareyear_vghrsday_meta <- rma(yi=yi, vi=vi, measure="MD", method="FE", data=anycareyear_meta))

##
## Fixed-Effects Model (k = 2)
##
## Test for Heterogeneity:
## Q(df = 1) = 3.2904, p-val = 0.0697
##
## Model Results:
##

```

```
## estimate    se    zval    pval    ci.lb    ci.ub
## 0.0443 0.1827 0.2424 0.8085 -0.3137 0.4023
##
## ---
## Signif. codes: 0 '***' 0.001 '**' 0.01 '*' 0.05 '.' 0.1 ' ' 1
```

## Hours per week

### #Study 1

```
anycareyear_yes_ds1_vghrsweek <- subset(anycareyear_yes_ds1, select =
c(vghrsweek)) #Subset 1i data
anycareyear_vghrsweek_m1i <- apply(anycareyear_yes_ds1_vghrsweek, 2,
mean) #Calculate m1i
anycareyear_vghrsweek_sd1i <- apply(anycareyear_yes_ds1_vghrsweek, 2,
sd) #Calculate sd1i
anycareyear_vghrsweek_n1i <- colSums(!
is.na(anycareyear_yes_ds1_vghrsweek)) #Calculate n1i
anycareyear_no_ds1_vghrsweek <- subset(anycareyear_no_ds1, select =
c(vghrsweek)) #Subset 2i data
anycareyear_vghrsweek_m2i <- apply(anycareyear_no_ds1_vghrsweek, 2,
mean) #Calculate m2i
anycareyear_vghrsweek_sd2i <- apply(anycareyear_no_ds1_vghrsweek, 2,
sd) #Calculate sd2i
anycareyear_vghrsweek_n2i <- colSums(!
is.na(anycareyear_no_ds1_vghrsweek)) #Calculate n2i
ds1anycareyear_meta <- data.frame(m1i = anycareyear_vghrsweek_m1i,
sd1i = anycareyear_vghrsweek_sd1i, n1i = anycareyear_vghrsweek_n1i, m2i
= anycareyear_vghrsweek_m2i, sd2i = anycareyear_vghrsweek_sd2i, n2i =
anycareyear_vghrsweek_n2i) #MA dataframe
ds1anycareyear_meta <- escalc(measure="MD", m1i = m1i, sd1i = sd1i, n1i
= n1i, m2i = m2i, sd2i = sd2i, n2i = n2i, data=ds1anycareyear_meta)
#Calculate yi and vi
```

### #Study 2

```
anycareyear_yes_ds2_vghrsweek <- subset(anycareyear_yes_ds2, select =
c(vghrsweek)) #Subset 1i data
anycareyear_vghrsweek_m1i <- apply(anycareyear_yes_ds2_vghrsweek, 2,
mean) #Calculate m1i
anycareyear_vghrsweek_sd1i <- apply(anycareyear_yes_ds2_vghrsweek, 2,
sd) #Calculate sd1i
anycareyear_vghrsweek_n1i <- colSums(!
is.na(anycareyear_yes_ds2_vghrsweek)) #Calculate n1i
anycareyear_no_ds2_vghrsweek <- subset(anycareyear_no_ds2, select =
c(vghrsweek)) #Subset 2i data
anycareyear_vghrsweek_m2i <- apply(anycareyear_no_ds2_vghrsweek, 2,
mean) #Calculate m2i
anycareyear_vghrsweek_sd2i <- apply(anycareyear_no_ds2_vghrsweek, 2,
sd) #Calculate sd2i
anycareyear_vghrsweek_n2i <- colSums(!
```



```

is.na(anycareyear_no_ds2_vghrsweek)) #Calculate n2i
ds2anycareyear_meta <- data.frame(m1i = anycareyear_vghrsweek_m1i,
sd1i = anycareyear_vghrsweek_sd1i, n1i = anycareyear_vghrsweek_n1i, m2i
= anycareyear_vghrsweek_m2i, sd2i = anycareyear_vghrsweek_sd2i, n2i =
anycareyear_vghrsweek_n2i) #MA dataframe
ds2anycareyear_meta <- escalc(measure="MD", m1i = m1i, sd1i = sd1i, n1i
= n1i, m2i = m2i, sd2i = sd2i, n2i = n2i, data=ds2anycareyear_meta)
#Calculate yi and vi

```

```

#FE meta-analysis

```

```

(anycareyear_meta <- rbind(ds1anycareyear_meta, ds2anycareyear_meta))

```

```

##      m1i  sd1i n1i  m2i  sd2i n2i  yi  vi
## 1 12.42574 12.68649 101 14.04321 13.74314 162 -1.6175 2.7594
## 2 20.88038 25.21351 209 17.36555 20.42163 238 3.5148 4.7940

```

```

(anycareyear_vghrsweek_meta <- rma(yi=yi, vi=vi, measure="MD",
method="FE", data=anycareyear_meta))

```

```

##
## Fixed-Effects Model (k = 2)
##
## Test for Heterogeneity:
## Q(df = 1) = 3.4872, p-val = 0.0618
##
## Model Results:
##
## estimate    se    zval    pval  ci.lb  ci.ub
## 0.2575  1.3234  0.1946  0.8457 -2.3363  2.8513
##
## ---
## Signif. codes:  0 '***' 0.001 '**' 0.01 '*' 0.05 '.' 0.1 ' ' 1

```

## Days per week

```

#Study 1

```

```

anycareyear_yes_ds1_vgdaysweek <- subset(anycareyear_yes_ds1, select =
c(vgdaysweek)) #Subset 1i data
anycareyear_vgdaysweek_m1i <- apply(anycareyear_yes_ds1_vgdaysweek,
2, mean) #Calculate m1i
anycareyear_vgdaysweek_sd1i <- apply(anycareyear_yes_ds1_vgdaysweek,
2, sd) #Calculate sd1i
anycareyear_vgdaysweek_n1i <- colSums(!
is.na(anycareyear_yes_ds1_vgdaysweek)) #Calculate n1i
anycareyear_no_ds1_vgdaysweek <- subset(anycareyear_no_ds1, select =
c(vgdaysweek)) #Subset 2i data
anycareyear_vgdaysweek_m2i <- apply(anycareyear_no_ds1_vgdaysweek, 2,
mean) #Calculate m2i
anycareyear_vgdaysweek_sd2i <- apply(anycareyear_no_ds1_vgdaysweek, 2,
sd) #Calculate sd2i

```

```

anycareyear_vgdaysweek_n2i <- colSums(!
is.na(anycareyear_no_ds1_vgdaysweek)) #Calculate n2i
ds1anycareyear_meta <- data.frame(m1i = anycareyear_vgdaysweek_m1i,
sd1i = anycareyear_vgdaysweek_sd1i, n1i = anycareyear_vgdaysweek_n1i,
m2i = anycareyear_vgdaysweek_m2i, sd2i = anycareyear_vgdaysweek_sd2i,
n2i = anycareyear_vgdaysweek_n2i) #MA dataframe
ds1anycareyear_meta <- escalc(measure="MD", m1i = m1i, sd1i = sd1i, n1i
= n1i, m2i = m2i, sd2i = sd2i, n2i = n2i, data=ds1anycareyear_meta)
#Calculate yi and vi

#Study 2
anycareyear_yes_ds2_vgdaysweek <- subset(anycareyear_yes_ds2, select =
c(vgdaysweek)) #Subset 1i data
anycareyear_vgdaysweek_m1i <- apply(anycareyear_yes_ds2_vgdaysweek,
2, mean) #Calculate m1i
anycareyear_vgdaysweek_sd1i <- apply(anycareyear_yes_ds2_vgdaysweek,
2, sd) #Calculate sd1i
anycareyear_vgdaysweek_n1i <- colSums(!
is.na(anycareyear_yes_ds2_vgdaysweek)) #Calculate n1i
anycareyear_no_ds2_vgdaysweek <- subset(anycareyear_no_ds2, select =
c(vgdaysweek)) #Subset 2i data
anycareyear_vgdaysweek_m2i <- apply(anycareyear_no_ds2_vgdaysweek, 2,
mean) #Calculate m2i
anycareyear_vgdaysweek_sd2i <- apply(anycareyear_no_ds2_vgdaysweek, 2,
sd) #Calculate sd2i
anycareyear_vgdaysweek_n2i <- colSums(!
is.na(anycareyear_no_ds2_vgdaysweek)) #Calculate n2i
ds2anycareyear_meta <- data.frame(m1i = anycareyear_vgdaysweek_m1i,
sd1i = anycareyear_vgdaysweek_sd1i, n1i = anycareyear_vgdaysweek_n1i,
m2i = anycareyear_vgdaysweek_m2i, sd2i = anycareyear_vgdaysweek_sd2i,
n2i = anycareyear_vgdaysweek_n2i) #MA dataframe
ds2anycareyear_meta <- escalc(measure="MD", m1i = m1i, sd1i = sd1i, n1i
= n1i, m2i = m2i, sd2i = sd2i, n2i = n2i, data=ds2anycareyear_meta)
#Calculate yi and vi

#FE meta-analysis
(anycareyear_meta <- rbind(ds1anycareyear_meta, ds2anycareyear_meta))

##      m1i  sd1i n1i  m2i  sd2i n2i  yi  vi
## 1 5.138614 2.245127 101 5.172840 2.222360 162 -0.0342 0.0804
## 2 4.904306 2.139471 209 4.651261 2.253974 238 0.2530 0.0432

(anycareyear_vgdaysweek_meta <- rma(yi=yi, vi=vi, measure="MD",
method="FE", data=anycareyear_meta))

##
## Fixed-Effects Model (k = 2)
##
## Test for Heterogeneity:
## Q(df = 1) = 0.6675, p-val = 0.4139
##

```

```
## Model Results:
##
## estimate    se    zval    pval    ci.lb    ci.ub
## 0.1526 0.1677 0.9098 0.3629 -0.1761 0.4812
##
## ---
## Signif. codes: 0 '***' 0.001 '**' 0.01 '*' 0.05 '.' 0.1 ' ' 1
```

## Any care - Month

### Replicated Effect

#### Hours per day

##### Study 1

```
(vghrsday_anycaremonth_ds1 <- t.test(vghrsday ~ anymonth,
data=ds1anyscreen))
```

```
##
## Welch Two Sample t-test
##
## data: vghrsday by anymonth
## t = -1.6981, df = 42.665, p-value = 0.09678
## alternative hypothesis: true difference in means is not equal to 0
## 95 percent confidence interval:
## -1.3598088 0.1167838
## sample estimates:
## mean in group 0 mean in group 1
## 2.295154 2.916667
```

##### Study 2

```
(vghrsday_anycaremonth_ds2 <- t.test(vghrsday ~ anymonth,
data=ds2anyscreen))
```

```
##
## Welch Two Sample t-test
##
## data: vghrsday by anymonth
## t = 0.3906, df = 172.75, p-value = 0.6966
## alternative hypothesis: true difference in means is not equal to 0
## 95 percent confidence interval:
## -0.5400568 0.8065367
## sample estimates:
## mean in group 0 mean in group 1
## 3.655462 3.522222
```

## Hours per week

### Study 1

```
(vghrsweek_anycaremonth_ds1 <- t.test(vghrsweek ~ anymonth,  
data=ds1anyscreen))
```

```
##  
## Welch Two Sample t-test  
##  
## data: vghrsweek by anymonth  
## t = -1.25, df = 42.65, p-value = 0.2181  
## alternative hypothesis: true difference in means is not equal to 0  
## 95 percent confidence interval:  
## -9.068652  2.129592  
## sample estimates:  
## mean in group 0 mean in group 1  
##    12.94714    16.41667
```

### Study 2

```
(vghrsweek_anycaremonth_ds2 <- t.test(vghrsweek ~ anymonth,  
data=ds2anyscreen))
```

```
##  
## Welch Two Sample t-test  
##  
## data: vghrsweek by anymonth  
## t = 0.38076, df = 170.23, p-value = 0.7039  
## alternative hypothesis: true difference in means is not equal to 0  
## 95 percent confidence interval:  
## -3.714307  5.489657  
## sample estimates:  
## mean in group 0 mean in group 1  
##    19.18768    18.30000
```

## Days per week

### Study 1

```
(vgdaysweek_anycaremonth_ds1 <- t.test(vgdaysweek ~ anymonth,  
data=ds1anyscreen))
```

```
##  
## Welch Two Sample t-test  
##  
## data: vgdaysweek by anymonth  
## t = -0.25859, df = 46.433, p-value = 0.7971
```

```
## alternative hypothesis: true difference in means is not equal to 0
## 95 percent confidence interval:
## -0.9188367 0.7095856
## sample estimates:
## mean in group 0 mean in group 1
##      5.145374      5.250000
```

## Study 2

```
(vgdaysweek_anycaremonth_ds2 <- t.test(vgdaysweek ~ anymonth,
data=ds2anyscreen))
```

```
##
## Welch Two Sample t-test
##
## data: vgdaysweek by anymonth
## t = -1.2864, df = 147.57, p-value = 0.2003
## alternative hypothesis: true difference in means is not equal to 0
## 95 percent confidence interval:
## -0.8023105 0.1696308
## sample estimates:
## mean in group 0 mean in group 1
##      4.705882      5.022222
```

## MD

### Hours per day

#### #Study 1

```
anycaremonth_yes_ds1_vghrsday <- subset(anycaremonth_yes_ds1, select =
c(vghrsday)) #Subset 1i data
anycaremonth_vghrsday_m1i <- apply(anycaremonth_yes_ds1_vghrsday, 2,
mean) #Calculate m1i
anycaremonth_vghrsday_sd1i <- apply(anycaremonth_yes_ds1_vghrsday, 2,
sd) #Calculate sd1i
anycaremonth_vghrsday_n1i <- colSums(!
is.na(anycaremonth_yes_ds1_vghrsday)) #Calculate n1i
anycaremonth_no_ds1_vghrsday <- subset(anycaremonth_no_ds1, select =
c(vghrsday)) #Subset 2i data
anycaremonth_vghrsday_m2i <- apply(anycaremonth_no_ds1_vghrsday, 2,
mean) #Calculate m2i
anycaremonth_vghrsday_sd2i <- apply(anycaremonth_no_ds1_vghrsday, 2,
sd) #Calculate sd2i
anycaremonth_vghrsday_n2i <- colSums(!
is.na(anycaremonth_no_ds1_vghrsday)) #Calculate n2i
ds1anycaremonth_meta <- data.frame(m1i = anycaremonth_vghrsday_m1i,
sd1i = anycaremonth_vghrsday_sd1i, n1i = anycaremonth_vghrsday_n1i, m2i
= anycaremonth_vghrsday_m2i, sd2i = anycaremonth_vghrsday_sd2i, n2i =
```

```

anycaremonth_vghrsday_n2i) #MA dataframe
ds1anycaremonth_meta <- escalc(measure="MD", m1i = m1i, sd1i = sd1i,
n1i = n1i, m2i = m2i, sd2i = sd2i, n2i = n2i, data=ds1anycaremonth_meta)
#Calculate yi and vi

#Study 2
anycaremonth_yes_ds2_vghrsday <- subset(anycaremonth_yes_ds2, select =
c(vghrsday)) #Subset 1i data
anycaremonth_vghrsday_m1i <- apply(anycaremonth_yes_ds2_vghrsday, 2,
mean) #Calculate m1i
anycaremonth_vghrsday_sd1i <- apply(anycaremonth_yes_ds2_vghrsday, 2,
sd) #Calculate sd1i
anycaremonth_vghrsday_n1i <- colSums(!
is.na(anycaremonth_yes_ds2_vghrsday)) #Calculate n1i
anycaremonth_no_ds2_vghrsday <- subset(anycaremonth_no_ds2, select =
c(vghrsday)) #Subset 2i data
anycaremonth_vghrsday_m2i <- apply(anycaremonth_no_ds2_vghrsday, 2,
mean) #Calculate m2i
anycaremonth_vghrsday_sd2i <- apply(anycaremonth_no_ds2_vghrsday, 2,
sd) #Calculate sd2i
anycaremonth_vghrsday_n2i <- colSums(!
is.na(anycaremonth_no_ds2_vghrsday)) #Calculate n2i
ds2anycaremonth_meta <- data.frame(m1i = anycaremonth_vghrsday_m1i,
sd1i = anycaremonth_vghrsday_sd1i, n1i = anycaremonth_vghrsday_n1i, m2i
= anycaremonth_vghrsday_m2i, sd2i = anycaremonth_vghrsday_sd2i, n2i =
anycaremonth_vghrsday_n2i) #MA dataframe
ds2anycaremonth_meta <- escalc(measure="MD", m1i = m1i, sd1i = sd1i,
n1i = n1i, m2i = m2i, sd2i = sd2i, n2i = n2i, data=ds2anycaremonth_meta)
#Calculate yi and vi

#FE meta-analysis
(anycaremonth_meta <- rbind(ds1anycaremonth_meta,
ds2anycaremonth_meta))

##      m1i  sd1i n1i   m2i  sd2i n2i   yi  vi
## 1 2.916667 2.089087 36 2.295154 1.700110 227 0.6215 0.1340
## 2 3.522222 2.711721 90 3.655462 3.517461 357 -0.1332 0.1164

(anycaremonth_vghrsday_meta <- rma(yi=yi, vi=vi, measure="MD",
method="FE", data=anycaremonth_meta))

##
## Fixed-Effects Model (k = 2)
##
## Test for Heterogeneity:
## Q(df = 1) = 2.2756, p-val = 0.1314
##
## Model Results:
##
## estimate    se    zval    pval  ci.lb  ci.ub
## 0.2176 0.2495 0.8720 0.3832 -0.2715 0.7067

```

```
##  
## ---  
## Signif. codes:  0 '***' 0.001 '**' 0.01 '*' 0.05 '.' 0.1 ' ' 1
```

## Hours per week

### #Study 1

```
anycaremonth_yes_ds1_vghrsweek <- subset(anycaremonth_yes_ds1, select  
= c(vghrsweek)) #Subset 1i data  
anycaremonth_vghrsweek_m1i <- apply(anycaremonth_yes_ds1_vghrsweek,  
2, mean) #Calculate m1i  
anycaremonth_vghrsweek_sd1i <- apply(anycaremonth_yes_ds1_vghrsweek,  
2, sd) #Calculate sd1i  
anycaremonth_vghrsweek_n1i <- colSums(!  
is.na(anycaremonth_yes_ds1_vghrsweek)) #Calculate n1i  
anycaremonth_no_ds1_vghrsweek <- subset(anycaremonth_no_ds1, select =  
c(vghrsweek)) #Subset 2i data  
anycaremonth_vghrsweek_m2i <- apply(anycaremonth_no_ds1_vghrsweek,  
2, mean) #Calculate m2i  
anycaremonth_vghrsweek_sd2i <- apply(anycaremonth_no_ds1_vghrsweek,  
2, sd) #Calculate sd2i  
anycaremonth_vghrsweek_n2i <- colSums(!  
is.na(anycaremonth_no_ds1_vghrsweek)) #Calculate n2i  
ds1anycaremonth_meta <- data.frame(m1i = anycaremonth_vghrsweek_m1i,  
sd1i = anycaremonth_vghrsweek_sd1i, n1i = anycaremonth_vghrsweek_n1i,  
m2i = anycaremonth_vghrsweek_m2i, sd2i = anycaremonth_vghrsweek_sd2i,  
n2i = anycaremonth_vghrsweek_n2i) #MA dataframe  
ds1anycaremonth_meta <- escalc(measure="MD", m1i = m1i, sd1i = sd1i,  
n1i = n1i, m2i = m2i, sd2i = sd2i, n2i = n2i, data=ds1anycaremonth_meta)  
#Calculate yi and vi
```

### #Study 2

```
anycaremonth_yes_ds2_vghrsweek <- subset(anycaremonth_yes_ds2, select  
= c(vghrsweek)) #Subset 1i data  
anycaremonth_vghrsweek_m1i <- apply(anycaremonth_yes_ds2_vghrsweek,  
2, mean) #Calculate m1i  
anycaremonth_vghrsweek_sd1i <- apply(anycaremonth_yes_ds2_vghrsweek,  
2, sd) #Calculate sd1i  
anycaremonth_vghrsweek_n1i <- colSums(!  
is.na(anycaremonth_yes_ds2_vghrsweek)) #Calculate n1i  
anycaremonth_no_ds2_vghrsweek <- subset(anycaremonth_no_ds2, select =  
c(vghrsweek)) #Subset 2i data  
anycaremonth_vghrsweek_m2i <- apply(anycaremonth_no_ds2_vghrsweek,  
2, mean) #Calculate m2i  
anycaremonth_vghrsweek_sd2i <- apply(anycaremonth_no_ds2_vghrsweek,  
2, sd) #Calculate sd2i  
anycaremonth_vghrsweek_n2i <- colSums(!  
is.na(anycaremonth_no_ds2_vghrsweek)) #Calculate n2i  
ds2anycaremonth_meta <- data.frame(m1i = anycaremonth_vghrsweek_m1i,
```

```
sd1i = anycaremonth_vghrsweek_sd1i, n1i = anycaremonth_vghrsweek_n1i,
m2i = anycaremonth_vghrsweek_m2i, sd2i = anycaremonth_vghrsweek_sd2i,
n2i = anycaremonth_vghrsweek_n2i) #MA dataframe
ds2anycaremonth_meta <- escalc(measure="MD", m1i = m1i, sd1i = sd1i,
n1i = n1i, m2i = m2i, sd2i = sd2i, n2i = n2i, data=ds2anycaremonth_meta)
#Calculate yi and vi
```

### #FE meta-analysis

```
(anycaremonth_meta <- rbind(ds1anycaremonth_meta,
ds2anycaremonth_meta))
```

```
##      m1i  sd1i n1i  m2i  sd2i n2i  yi  vi
## 1 16.41667 15.84456 36 12.94714 12.88227 227 3.4695 7.7047
## 2 18.30000 18.61222 90 19.18768 23.79432 357 -0.8877 5.4350
```

```
(anycaremonth_vghrsweek_meta <- rma(yi=yi, vi=vi, measure="MD",
method="FE", data=anycaremonth_meta))
```

```
##
## Fixed-Effects Model (k = 2)
##
## Test for Heterogeneity:
## Q(df = 1) = 1.4449, p-val = 0.2294
##
## Model Results:
##
## estimate      se    zval    pval  ci.lb  ci.ub
## 0.9146  1.7852  0.5123  0.6084 -2.5843  4.4135
##
## ---
## Signif. codes:  0 '***' 0.001 '**' 0.01 '*' 0.05 '.' 0.1 ' ' 1
```

## Days per week

### #Study 1

```
anycaremonth_yes_ds1_vgdaysweek <- subset(anycaremonth_yes_ds1,
select = c(vgdaysweek)) #Subset 1i data
anycaremonth_vgdaysweek_m1i <-
apply(anycaremonth_yes_ds1_vgdaysweek, 2, mean) #Calculate m1i
anycaremonth_vgdaysweek_sd1i <-
apply(anycaremonth_yes_ds1_vgdaysweek, 2, sd) #Calculate sd1i
anycaremonth_vgdaysweek_n1i <- colSums(!
is.na(anycaremonth_yes_ds1_vgdaysweek)) #Calculate n1i
anycaremonth_no_ds1_vgdaysweek <- subset(anycaremonth_no_ds1, select
= c(vgdaysweek)) #Subset 2i data
anycaremonth_vgdaysweek_m2i <-
apply(anycaremonth_no_ds1_vgdaysweek, 2, mean) #Calculate m2i
anycaremonth_vgdaysweek_sd2i <-
apply(anycaremonth_no_ds1_vgdaysweek, 2, sd) #Calculate sd2i
anycaremonth_vgdaysweek_n2i <- colSums(!
```



```

is.na(anycaremonth_no_ds1_vgdaysweek)) #Calculate n2i
ds1anycaremonth_meta <- data.frame(m1i =
anycaremonth_vgdaysweek_m1i, sd1i = anycaremonth_vgdaysweek_sd1i, n1i
= anycaremonth_vgdaysweek_n1i, m2i = anycaremonth_vgdaysweek_m2i,
sd2i = anycaremonth_vgdaysweek_sd2i, n2i =
anycaremonth_vgdaysweek_n2i) #MA dataframe
ds1anycaremonth_meta <- escalc(measure="MD", m1i = m1i, sd1i = sd1i,
n1i = n1i, m2i = m2i, sd2i = sd2i, n2i = n2i, data=ds1anycaremonth_meta)
#Calculate yi and vi

```

### #Study 2

```

anycaremonth_yes_ds2_vgdaysweek <- subset(anycaremonth_yes_ds2,
select = c(vgdaysweek)) #Subset 1i data
anycaremonth_vgdaysweek_m1i <-
apply(anycaremonth_yes_ds2_vgdaysweek, 2, mean) #Calculate m1i
anycaremonth_vgdaysweek_sd1i <-
apply(anycaremonth_yes_ds2_vgdaysweek, 2, sd) #Calculate sd1i
anycaremonth_vgdaysweek_n1i <- colSums(!
is.na(anycaremonth_yes_ds2_vgdaysweek)) #Calculate n1i
anycaremonth_no_ds2_vgdaysweek <- subset(anycaremonth_no_ds2, select
= c(vgdaysweek)) #Subset 2i data
anycaremonth_vgdaysweek_m2i <-
apply(anycaremonth_no_ds2_vgdaysweek, 2, mean) #Calculate m2i
anycaremonth_vgdaysweek_sd2i <-
apply(anycaremonth_no_ds2_vgdaysweek, 2, sd) #Calculate sd2i
anycaremonth_vgdaysweek_n2i <- colSums(!
is.na(anycaremonth_no_ds2_vgdaysweek)) #Calculate n2i
ds2anycaremonth_meta <- data.frame(m1i =
anycaremonth_vgdaysweek_m1i, sd1i = anycaremonth_vgdaysweek_sd1i, n1i
= anycaremonth_vgdaysweek_n1i, m2i = anycaremonth_vgdaysweek_m2i,
sd2i = anycaremonth_vgdaysweek_sd2i, n2i =
anycaremonth_vgdaysweek_n2i) #MA dataframe
ds2anycaremonth_meta <- escalc(measure="MD", m1i = m1i, sd1i = sd1i,
n1i = n1i, m2i = m2i, sd2i = sd2i, n2i = n2i, data=ds2anycaremonth_meta)
#Calculate yi and vi

```

### #FE meta-analysis

```

(anycaremonth_meta <- rbind(ds1anycaremonth_meta,
ds2anycaremonth_meta))

```

```

##      m1i  sd1i n1i  m2i  sd2i n2i  yi  vi
## 1 5.250000 2.259899 36 5.145374 2.226353 227 0.1046 0.1637
## 2 5.022222 2.044328 90 4.705882 2.238653 357 0.3163 0.0605

```

```

(anycaremonth_vgdaysweek_meta <- rma(yi=yi, vi=vi, measure="MD",
method="FE", data=anycaremonth_meta))

```

```

##
## Fixed-Effects Model (k = 2)
##
## Test for Heterogeneity:

```

```
## Q(df = 1) = 0.1999, p-val = 0.6548
##
## Model Results:
##
## estimate      se      zval      pval      ci.lb      ci.ub
## 0.2592 0.2101 1.2336 0.2174 -0.1526 0.6711
##
## ---
## Signif. codes: 0 '***' 0.001 '**' 0.01 '*' 0.05 '.' 0.1 ' ' 1
```

## Mental health care - discharge

### Replicated Effect

#### Hours per day

##### Study 1

```
(vghrsday_mhdis_ds1 <- t.test(vghrsday ~ mhdis, data=ds1anymhscreen))
```

```
##
## Welch Two Sample t-test
##
## data: vghrsday by mhdis
## t = 0.68063, df = 84.106, p-value = 0.498
## alternative hypothesis: true difference in means is not equal to 0
## 95 percent confidence interval:
## -0.4493641 0.9170512
## sample estimates:
## mean in group 0 mean in group 1
## 2.775510 2.541667
```

##### Study 2

```
(vghrsday_mhdis_ds2 <- t.test(vghrsday ~ mhdis, data=ds2anymhscreen))
```

```
##
## Welch Two Sample t-test
##
## data: vghrsday by mhdis
## t = -2.4998, df = 205.15, p-value = 0.01321
## alternative hypothesis: true difference in means is not equal to 0
## 95 percent confidence interval:
## -1.5912819 -0.1879708
## sample estimates:
## mean in group 0 mean in group 1
## 3.194444 4.084071
```

## Hours per week

### Study 1

```
(vghrsweek_mhdis_ds1 <- t.test(vghrsweek ~ mhdis,  
data=ds1anymhscreen))
```

```
##  
## Welch Two Sample t-test  
##  
## data: vghrsweek by mhdis  
## t = 0.70153, df = 82.026, p-value = 0.485  
## alternative hypothesis: true difference in means is not equal to 0  
## 95 percent confidence interval:  
## -3.378858 7.060150  
## sample estimates:  
## mean in group 0 mean in group 1  
## 16.44898 14.60833
```

### Study 2

```
(vghrsweek_mhdis_ds2 <- t.test(vghrsweek ~ mhdis,  
data=ds2anymhscreen))
```

```
##  
## Welch Two Sample t-test  
##  
## data: vghrsweek by mhdis  
## t = -2.8177, df = 216.39, p-value = 0.005286  
## alternative hypothesis: true difference in means is not equal to 0  
## 95 percent confidence interval:  
## -11.519971 -2.036813  
## sample estimates:  
## mean in group 0 mean in group 1  
## 15.70833 22.48673
```

## Days per week

### Study 1

```
(vgdaysweek_mhdis_ds1 <- t.test(vgdaysweek ~ mhdis,  
data=ds1anymhscreen))
```

```
##  
## Welch Two Sample t-test  
##  
## data: vgdaysweek by mhdis  
## t = -0.3834, df = 88.029, p-value = 0.7024
```

```
## alternative hypothesis: true difference in means is not equal to 0
## 95 percent confidence interval:
## -0.9022650 0.6104283
## sample estimates:
## mean in group 0 mean in group 1
##      5.204082      5.350000
```

## Study 2

```
(vgdaysweek_mhdis_ds2 <- t.test(vgdaysweek ~ mhdis,
data=ds2anymhscreen))
```

```
##
## Welch Two Sample t-test
##
## data: vgdaysweek by mhdis
## t = -1.5956, df = 110.58, p-value = 0.1134
## alternative hypothesis: true difference in means is not equal to 0
## 95 percent confidence interval:
## -1.1096841 0.1197628
## sample estimates:
## mean in group 0 mean in group 1
##      4.513889      5.008850
```

## MD

### Hours per day

```
#Study 1
mhdis_yes_ds1_vghrsday <- subset(mhdis_yes_ds1, select = c(vghrsday))
#Subset 1i data
mhdis_vghrsday_m1i <- apply(mhdis_yes_ds1_vghrsday, 2, mean)
#Calculate m1i
mhdis_vghrsday_sd1i <- apply(mhdis_yes_ds1_vghrsday, 2, sd) #Calculate
sd1i
mhdis_vghrsday_n1i <- colSums(!is.na(mhdis_yes_ds1_vghrsday)) #Calculate
n1i
mhdis_no_ds1_vghrsday <- subset(mhdis_no_ds1, select = c(vghrsday))
#Subset 2i data
mhdis_vghrsday_m2i <- apply(mhdis_no_ds1_vghrsday, 2, mean) #Calculate
m2i
mhdis_vghrsday_sd2i <- apply(mhdis_no_ds1_vghrsday, 2, sd) #Calculate
sd2i
mhdis_vghrsday_n2i <- colSums(!is.na(mhdis_no_ds1_vghrsday)) #Calculate
n2i
ds1mhdis_meta <- data.frame(m1i = mhdis_vghrsday_m1i, sd1i =
mhdis_vghrsday_sd1i, n1i = mhdis_vghrsday_n1i, m2i =
mhdis_vghrsday_m2i, sd2i = mhdis_vghrsday_sd2i, n2i =
```

```

mhdís_vghrsday_n2i) #MA dataframe
ds1mhdís_meta <- escalc(measure="MD", m1i = m1i, sd1i = sd1i, n1i = n1i,
m2i = m2i, sd2i = sd2i, n2i = n2i, data=ds1mhdís_meta) #Calculate yi and vi

```

```

#Study 2

```

```

mhdís_yes_ds2_vghrsday <- subset(mhdís_yes_ds2, select = c(vghrsday))

```

```

#Subset 1i data

```

```

mhdís_vghrsday_m1i <- apply(mhdís_yes_ds2_vghrsday, 2, mean)

```

```

#Calculate m1i

```

```

mhdís_vghrsday_sd1i <- apply(mhdís_yes_ds2_vghrsday, 2, sd) #Calculate
sd1i

```

```

mhdís_vghrsday_n1i <- colSums(!is.na(mhdís_yes_ds2_vghrsday)) #Calculate
n1i

```

```

mhdís_no_ds2_vghrsday <- subset(mhdís_no_ds2, select = c(vghrsday))

```

```

#Subset 2i data

```

```

mhdís_vghrsday_m2i <- apply(mhdís_no_ds2_vghrsday, 2, mean) #Calculate
m2i

```

```

mhdís_vghrsday_sd2i <- apply(mhdís_no_ds2_vghrsday, 2, sd) #Calculate
sd2i

```

```

mhdís_vghrsday_n2i <- colSums(!is.na(mhdís_no_ds2_vghrsday)) #Calculate
n2i

```

```

ds2mhdís_meta <- data.frame(m1i = mhdís_vghrsday_m1i, sd1i =

```

```

mhdís_vghrsday_sd1i, n1i = mhdís_vghrsday_n1i, m2i =

```

```

mhdís_vghrsday_m2i, sd2i = mhdís_vghrsday_sd2i, n2i =

```

```

mhdís_vghrsday_n2i) #MA dataframe

```

```

ds2mhdís_meta <- escalc(measure="MD", m1i = m1i, sd1i = sd1i, n1i = n1i,
m2i = m2i, sd2i = sd2i, n2i = n2i, data=ds2mhdís_meta) #Calculate yi and vi

```

```

#FE meta-analysis

```

```

(mhdís_meta <- rbind(ds1mhdís_meta, ds2mhdís_meta))

```

```

##      m1i  sd1i n1i   m2i  sd2i n2i   yi   vi
## 1 2.541667 1.931150 120 2.775510 2.064232 49 -0.2338 0.1180
## 2 4.084071 3.691072 226 3.194444 2.185992 72 0.8896 0.1267

```

```

(mhdís_vghrsday_meta <- rma(yi=yi, vi=vi, measure="MD", method="FE",
data=mhdís_meta))

```

```

##

```

```

## Fixed-Effects Model (k = 2)

```

```

##

```

```

## Test for Heterogeneity:

```

```

## Q(df = 1) = 5.1583, p-val = 0.0231

```

```

##

```

```

## Model Results:

```

```

##

```

```

## estimate    se    zval    pval  ci.lb  ci.ub
## 0.3081  0.2472  1.2465  0.2126 -0.1763  0.7926

```

```

##

```

```

## ---

```

```

## Signif. codes:  0 '***' 0.001 '**' 0.01 '*' 0.05 '.' 0.1 ' ' 1

```

## Hours per week

```
#Study 1
mhdís_yes_ds1_vghrsweek <- subset(mhdís_yes_ds1, select = c(vghrsweek))
#Subset 1i data
mhdís_vghrsweek_m1i <- apply(mhdís_yes_ds1_vghrsweek, 2, mean)
#Calculate m1i
mhdís_vghrsweek_sd1i <- apply(mhdís_yes_ds1_vghrsweek, 2, sd)
#Calculate sd1i
mhdís_vghrsweek_n1i <- colSums(!is.na(mhdís_yes_ds1_vghrsweek))
#Calculate n1i
mhdís_no_ds1_vghrsweek <- subset(mhdís_no_ds1, select = c(vghrsweek))
#Subset 2i data
mhdís_vghrsweek_m2i <- apply(mhdís_no_ds1_vghrsweek, 2, mean)
#Calculate m2i
mhdís_vghrsweek_sd2i <- apply(mhdís_no_ds1_vghrsweek, 2, sd) #Calculate
sd2i
mhdís_vghrsweek_n2i <- colSums(!is.na(mhdís_no_ds1_vghrsweek))
#Calculate n2i
ds1mhdís_meta <- data.frame(m1i = mhdís_vghrsweek_m1i, sd1i =
mhdís_vghrsweek_sd1i, n1i = mhdís_vghrsweek_n1i, m2i =
mhdís_vghrsweek_m2i, sd2i = mhdís_vghrsweek_sd2i, n2i =
mhdís_vghrsweek_n2i) #MA dataframe
ds1mhdís_meta <- escalc(measure="MD", m1i = m1i, sd1i = sd1i, n1i = n1i,
m2i = m2i, sd2i = sd2i, n2i = n2i, data=ds1mhdís_meta) #Calculate yi and vi

#Study 2
mhdís_yes_ds2_vghrsweek <- subset(mhdís_yes_ds2, select = c(vghrsweek))
#Subset 1i data
mhdís_vghrsweek_m1i <- apply(mhdís_yes_ds2_vghrsweek, 2, mean)
#Calculate m1i
mhdís_vghrsweek_sd1i <- apply(mhdís_yes_ds2_vghrsweek, 2, sd)
#Calculate sd1i
mhdís_vghrsweek_n1i <- colSums(!is.na(mhdís_yes_ds2_vghrsweek))
#Calculate n1i
mhdís_no_ds2_vghrsweek <- subset(mhdís_no_ds2, select = c(vghrsweek))
#Subset 2i data
mhdís_vghrsweek_m2i <- apply(mhdís_no_ds2_vghrsweek, 2, mean)
#Calculate m2i
mhdís_vghrsweek_sd2i <- apply(mhdís_no_ds2_vghrsweek, 2, sd) #Calculate
sd2i
mhdís_vghrsweek_n2i <- colSums(!is.na(mhdís_no_ds2_vghrsweek))
#Calculate n2i
ds2mhdís_meta <- data.frame(m1i = mhdís_vghrsweek_m1i, sd1i =
mhdís_vghrsweek_sd1i, n1i = mhdís_vghrsweek_n1i, m2i =
mhdís_vghrsweek_m2i, sd2i = mhdís_vghrsweek_sd2i, n2i =
mhdís_vghrsweek_n2i) #MA dataframe
ds2mhdís_meta <- escalc(measure="MD", m1i = m1i, sd1i = sd1i, n1i = n1i,
m2i = m2i, sd2i = sd2i, n2i = n2i, data=ds2mhdís_meta) #Calculate yi and vi
```

### #FE meta-analysis

```
(mhdis_meta <- rbind(ds1mhdis_meta, ds2mhdis_meta))
```

```
##      m1i sd1i n1i  m2i  sd2i n2i  yi  vi  
## 1 14.60833 14.42704 120 16.44898 15.88508 49 -1.8406 6.8842  
## 2 22.48673 25.60178 226 15.70833 14.41775 72 6.7784 5.7873
```

```
(mhdis_vghrsweek_meta <- rma(yi=yi, vi=vi, measure="MD", method="FE",  
data=mhdis_meta))
```

```
##  
## Fixed-Effects Model (k = 2)  
##  
## Test for Heterogeneity:  
## Q(df = 1) = 5.8626, p-val = 0.0155  
##  
## Model Results:  
##  
## estimate      se    zval    pval  ci.lb  ci.ub  
## 2.8419  1.7732  1.6027  0.1090 -0.6334  6.3173  
##  
## ---  
## Signif. codes:  0 '***' 0.001 '**' 0.01 '*' 0.05 '.' 0.1 ' ' 1
```

## Days per week

### #Study 1

```
mhdis_yes_ds1_vgdaysweek <- subset(mhdis_yes_ds1, select =  
c(vgdaysweek)) #Subset 1i data  
mhdis_vgdaysweek_m1i <- apply(mhdis_yes_ds1_vgdaysweek, 2, mean)  
#Calculate m1i  
mhdis_vgdaysweek_sd1i <- apply(mhdis_yes_ds1_vgdaysweek, 2, sd)  
#Calculate sd1i  
mhdis_vgdaysweek_n1i <- colSums(!is.na(mhdis_yes_ds1_vgdaysweek))  
#Calculate n1i  
mhdis_no_ds1_vgdaysweek <- subset(mhdis_no_ds1, select =  
c(vgdaysweek)) #Subset 2i data  
mhdis_vgdaysweek_m2i <- apply(mhdis_no_ds1_vgdaysweek, 2, mean)  
#Calculate m2i  
mhdis_vgdaysweek_sd2i <- apply(mhdis_no_ds1_vgdaysweek, 2, sd)  
#Calculate sd2i  
mhdis_vgdaysweek_n2i <- colSums(!is.na(mhdis_no_ds1_vgdaysweek))  
#Calculate n2i  
ds1mhdis_meta <- data.frame(m1i = mhdis_vgdaysweek_m1i, sd1i =  
mhdis_vgdaysweek_sd1i, n1i = mhdis_vgdaysweek_n1i, m2i =  
mhdis_vgdaysweek_m2i, sd2i = mhdis_vgdaysweek_sd2i, n2i =  
mhdis_vgdaysweek_n2i) #MA dataframe  
ds1mhdis_meta <- escalc(measure="MD", m1i = m1i, sd1i = sd1i, n1i = n1i,  
m2i = m2i, sd2i = sd2i, n2i = n2i, data=ds1mhdis_meta) #Calculate yi and vi
```

```

#Study 2
mhdis_yes_ds2_vgdaysweek <- subset(mhdis_yes_ds2, select =
c(vgdaysweek)) #Subset 1i data
mhdis_vgdaysweek_m1i <- apply(mhdis_yes_ds2_vgdaysweek, 2, mean)
#Calculate m1i
mhdis_vgdaysweek_sd1i <- apply(mhdis_yes_ds2_vgdaysweek, 2, sd)
#Calculate sd1i
mhdis_vgdaysweek_n1i <- colSums(!is.na(mhdis_yes_ds2_vgdaysweek))
#Calculate n1i
mhdis_no_ds2_vgdaysweek <- subset(mhdis_no_ds2, select =
c(vgdaysweek)) #Subset 2i data
mhdis_vgdaysweek_m2i <- apply(mhdis_no_ds2_vgdaysweek, 2, mean)
#Calculate m2i
mhdis_vgdaysweek_sd2i <- apply(mhdis_no_ds2_vgdaysweek, 2, sd)
#Calculate sd2i
mhdis_vgdaysweek_n2i <- colSums(!is.na(mhdis_no_ds2_vgdaysweek))
#Calculate n2i
ds2mhdis_meta <- data.frame(m1i = mhdis_vgdaysweek_m1i, sd1i =
mhdis_vgdaysweek_sd1i, n1i = mhdis_vgdaysweek_n1i, m2i =
mhdis_vgdaysweek_m2i, sd2i = mhdis_vgdaysweek_sd2i, n2i =
mhdis_vgdaysweek_n2i) #MA dataframe
ds2mhdis_meta <- escalc(measure="MD", m1i = m1i, sd1i = sd1i, n1i = n1i,
m2i = m2i, sd2i = sd2i, n2i = n2i, data=ds2mhdis_meta) #Calculate yi and vi

#FE meta-analysis
(mhdis_meta <- rbind(ds1mhdis_meta, ds2mhdis_meta))

##      m1i  sd1i n1i  m2i  sd2i n2i  yi  vi
## 1 5.35000 2.221552 120 5.204082 2.254436 49 0.1459 0.1449
## 2 5.00885 2.122873 226 4.513889 2.343664 72 0.4950 0.0962

(mhdis_vgdaysweek_meta <- rma(yi=yi, vi=vi, measure="MD",
method="FE", data=mhdis_meta))

##
## Fixed-Effects Model (k = 2)
##
## Test for Heterogeneity:
## Q(df = 1) = 0.5054, p-val = 0.4772
##
## Model Results:
##
## estimate    se    zval    pval  ci.lb  ci.ub
## 0.3556 0.2405 1.4790 0.1391 -0.1156 0.8269
##
## ---
## Signif. codes:  0 '***' 0.001 '**' 0.01 '*' 0.05 '.' 0.1 ' ' 1

```



## Mental health care - year

### Replicated Effect

#### Hours per day

##### Study 1

```
(vghrsday_mhyear_ds1 <- t.test(vghrsday ~ mhyear,  
data=ds1anymhscreen))
```

```
##  
## Welch Two Sample t-test  
##  
## data: vghrsday by mhyear  
## t = 1.37, df = 166.67, p-value = 0.1725  
## alternative hypothesis: true difference in means is not equal to 0  
## 95 percent confidence interval:  
## -0.1816303 1.0051432  
## sample estimates:  
## mean in group 0 mean in group 1  
## 2.806818 2.395062
```

##### Study 2

```
(vghrsday_mhyear_ds2 <- t.test(vghrsday ~ mhyear,  
data=ds2anymhscreen))
```

```
##  
## Welch Two Sample t-test  
##  
## data: vghrsday by mhyear  
## t = -1.123, df = 292.23, p-value = 0.2624  
## alternative hypothesis: true difference in means is not equal to 0  
## 95 percent confidence interval:  
## -1.1855396 0.3241387  
## sample estimates:  
## mean in group 0 mean in group 1  
## 3.614754 4.045455
```

#### Hours per week

##### Study 1

```
(vghrsweek_mhyear_ds1 <- t.test(vghrsweek ~ mhyear,  
data=ds1anymhscreen))
```

```
##  
## Welch Two Sample t-test
```

```
##
## data: vghrsweek by mhyear
## t = 1.378, df = 165.58, p-value = 0.1701
## alternative hypothesis: true difference in means is not equal to 0
## 95 percent confidence interval:
## -1.34943 7.58512
## sample estimates:
## mean in group 0 mean in group 1
## 16.63636 13.51852
```

## Study 2

```
(vghrsweek_mhyear_ds2 <- t.test(vghrsweek ~ mhyear,
data=ds2anymhscreen))
```

```
##
## Welch Two Sample t-test
##
## data: vghrsweek by mhyear
## t = -0.88549, df = 288.72, p-value = 0.3766
## alternative hypothesis: true difference in means is not equal to 0
## 95 percent confidence interval:
## -7.629388 2.894664
## sample estimates:
## mean in group 0 mean in group 1
## 19.45082 21.81818
```

## Days per week

### Study 1

```
(vgdaysweek_mhyear_ds1 <- t.test(vgdaysweek ~ mhyear,
data=ds1anymhscreen))
```

```
##
## Welch Two Sample t-test
##
## data: vgdaysweek by mhyear
## t = -0.14358, df = 166.81, p-value = 0.886
## alternative hypothesis: true difference in means is not equal to 0
## 95 percent confidence interval:
## -0.7263392 0.6278543
## sample estimates:
## mean in group 0 mean in group 1
## 5.284091 5.333333
```

## Study 2

```
(vgdaysweek_mhyear_ds2 <- t.test(vgdaysweek ~ mhyear,  
data=ds2anymhscreen))
```

```
##  
## Welch Two Sample t-test  
##  
## data: vgdaysweek by mhyear  
## t = -0.45046, df = 246.26, p-value = 0.6528  
## alternative hypothesis: true difference in means is not equal to 0  
## 95 percent confidence interval:  
## -0.6330343 0.3973785  
## sample estimates:  
## mean in group 0 mean in group 1  
## 4.819672 4.937500
```

## MD

### Hours per day

```
#Study 1  
mhyear_yes_ds1_vghrsday <- subset(mhyear_yes_ds1, select = c(vghrsday))  
#Subset 1i data  
mhyear_vghrsday_m1i <- apply(mhyear_yes_ds1_vghrsday, 2, mean)  
#Calculate m1i  
mhyear_vghrsday_sd1i <- apply(mhyear_yes_ds1_vghrsday, 2, sd)  
#Calculate sd1i  
mhyear_vghrsday_n1i <- colSums(!is.na(mhyear_yes_ds1_vghrsday))  
#Calculate n1i  
mhyear_no_ds1_vghrsday <- subset(mhyear_no_ds1, select = c(vghrsday))  
#Subset 2i data  
mhyear_vghrsday_m2i <- apply(mhyear_no_ds1_vghrsday, 2, mean)  
#Calculate m2i  
mhyear_vghrsday_sd2i <- apply(mhyear_no_ds1_vghrsday, 2, sd) #Calculate  
sd2i  
mhyear_vghrsday_n2i <- colSums(!is.na(mhyear_no_ds1_vghrsday))  
#Calculate n2i  
ds1mhyear_meta <- data.frame(m1i = mhyear_vghrsday_m1i, sd1i =  
mhyear_vghrsday_sd1i, n1i = mhyear_vghrsday_n1i, m2i =  
mhyear_vghrsday_m2i, sd2i = mhyear_vghrsday_sd2i, n2i =  
mhyear_vghrsday_n2i) #MA dataframe  
ds1mhyear_meta <- escalc(measure="MD", m1i = m1i, sd1i = sd1i, n1i =  
n1i, m2i = m2i, sd2i = sd2i, n2i = n2i, data=ds1mhyear_meta) #Calculate yi  
and vi  
  
#Study 2  
mhyear_yes_ds2_vghrsday <- subset(mhyear_yes_ds2, select = c(vghrsday))  
#Subset 1i data  
mhyear_vghrsday_m1i <- apply(mhyear_yes_ds2_vghrsday, 2, mean)
```

```

#Calculate m1i
mhyear_vghrsday_sd1i <- apply(mhyear_yes_ds2_vghrsday, 2, sd)
#Calculate sd1i
mhyear_vghrsday_n1i <- colSums(!is.na(mhyear_yes_ds2_vghrsday))
#Calculate n1i
mhyear_no_ds2_vghrsday <- subset(mhyear_no_ds2, select = c(vghrsday))
#Subset 2i data
mhyear_vghrsday_m2i <- apply(mhyear_no_ds2_vghrsday, 2, mean)
#Calculate m2i
mhyear_vghrsday_sd2i <- apply(mhyear_no_ds2_vghrsday, 2, sd) #Calculate
sd2i
mhyear_vghrsday_n2i <- colSums(!is.na(mhyear_no_ds2_vghrsday))
#Calculate n2i
ds2mhyear_meta <- data.frame(m1i = mhyear_vghrsday_m1i, sd1i =
mhyear_vghrsday_sd1i, n1i = mhyear_vghrsday_n1i, m2i =
mhyear_vghrsday_m2i, sd2i = mhyear_vghrsday_sd2i, n2i =
mhyear_vghrsday_n2i) #MA dataframe
ds2mhyear_meta <- escalc(measure="MD", m1i = m1i, sd1i = sd1i, n1i =
n1i, m2i = m2i, sd2i = sd2i, n2i = n2i, data=ds2mhyear_meta) #Calculate yi
and vi

```

### #FE meta-analysis

```

(mhyear_meta <- rbind(ds1mhyear_meta, ds2mhyear_meta))

```

```

##      m1i  sd1i n1i   m2i  sd2i n2i   yi   vi
## 1 2.395062 1.828107 81 2.806818 2.078118 88 -0.4118 0.0903
## 2 4.045455 3.723007 176 3.614754 2.887553 122 0.4307 0.1471

```

```

(mhyear_vghrsday_meta <- rma(yi=yi, vi=vi, measure="MD", method="FE",
data=mhyear_meta))

```

```

##
## Fixed-Effects Model (k = 2)
##
## Test for Heterogeneity:
## Q(df = 1) = 2.9892, p-val = 0.0838
##
## Model Results:
##
## estimate    se    zval    pval  ci.lb  ci.ub
## -0.0912  0.2366 -0.3857  0.6998 -0.5549  0.3724
##
## ---
## Signif. codes:  0 '***' 0.001 '**' 0.01 '*' 0.05 '.' 0.1 ' ' 1

```

### Hours per week

#### #Study 1

```

mhyear_yes_ds1_vghrsweek <- subset(mhyear_yes_ds1, select =
c(vghrsweek)) #Subset 1i data

```

```

mhyear_vghrsweek_m1i <- apply(mhyear_yes_ds1_vghrsweek, 2, mean)
#Calculate m1i
mhyear_vghrsweek_sd1i <- apply(mhyear_yes_ds1_vghrsweek, 2, sd)
#Calculate sd1i
mhyear_vghrsweek_n1i <- colSums(!is.na(mhyear_yes_ds1_vghrsweek))
#Calculate n1i
mhyear_no_ds1_vghrsweek <- subset(mhyear_no_ds1, select =
c(vghrsweek)) #Subset 2i data
mhyear_vghrsweek_m2i <- apply(mhyear_no_ds1_vghrsweek, 2, mean)
#Calculate m2i
mhyear_vghrsweek_sd2i <- apply(mhyear_no_ds1_vghrsweek, 2, sd)
#Calculate sd2i
mhyear_vghrsweek_n2i <- colSums(!is.na(mhyear_no_ds1_vghrsweek))
#Calculate n2i
ds1mhyear_meta <- data.frame(m1i = mhyear_vghrsweek_m1i, sd1i =
mhyear_vghrsweek_sd1i, n1i = mhyear_vghrsweek_n1i, m2i =
mhyear_vghrsweek_m2i, sd2i = mhyear_vghrsweek_sd2i, n2i =
mhyear_vghrsweek_n2i) #MA dataframe
ds1mhyear_meta <- escalc(measure="MD", m1i = m1i, sd1i = sd1i, n1i =
n1i, m2i = m2i, sd2i = sd2i, n2i = n2i, data=ds1mhyear_meta) #Calculate yi
and vi

```

#### *#Study 2*

```

mhyear_yes_ds2_vghrsweek <- subset(mhyear_yes_ds2, select =
c(vghrsweek)) #Subset 1i data
mhyear_vghrsweek_m1i <- apply(mhyear_yes_ds2_vghrsweek, 2, mean)
#Calculate m1i
mhyear_vghrsweek_sd1i <- apply(mhyear_yes_ds2_vghrsweek, 2, sd)
#Calculate sd1i
mhyear_vghrsweek_n1i <- colSums(!is.na(mhyear_yes_ds2_vghrsweek))
#Calculate n1i
mhyear_no_ds2_vghrsweek <- subset(mhyear_no_ds2, select =
c(vghrsweek)) #Subset 2i data
mhyear_vghrsweek_m2i <- apply(mhyear_no_ds2_vghrsweek, 2, mean)
#Calculate m2i
mhyear_vghrsweek_sd2i <- apply(mhyear_no_ds2_vghrsweek, 2, sd)
#Calculate sd2i
mhyear_vghrsweek_n2i <- colSums(!is.na(mhyear_no_ds2_vghrsweek))
#Calculate n2i
ds2mhyear_meta <- data.frame(m1i = mhyear_vghrsweek_m1i, sd1i =
mhyear_vghrsweek_sd1i, n1i = mhyear_vghrsweek_n1i, m2i =
mhyear_vghrsweek_m2i, sd2i = mhyear_vghrsweek_sd2i, n2i =
mhyear_vghrsweek_n2i) #MA dataframe
ds2mhyear_meta <- escalc(measure="MD", m1i = m1i, sd1i = sd1i, n1i =
n1i, m2i = m2i, sd2i = sd2i, n2i = n2i, data=ds2mhyear_meta) #Calculate yi
and vi

```

#### *#FE meta-analysis*

```

(mhyear_meta <- rbind(ds1mhyear_meta, ds2mhyear_meta))

```

```
##      m1i  sd1i n1i  m2i  sd2i n2i  yi  vi
## 1 13.51852 13.39600 81 16.63636 15.98576 88 -3.1178 5.1194
## 2 21.81818 25.40801 176 19.45082 20.60374 122 2.3674 7.1476
```

```
(mhyear_vghrsweek_meta <- rma(yi=yi, vi=vi, measure="MD",
method="FE", data=mhyear_meta))
```

```
##
## Fixed-Effects Model (k = 2)
##
## Test for Heterogeneity:
## Q(df = 1) = 2.4527, p-val = 0.1173
##
## Model Results:
##
## estimate      se      zval      pval      ci.lb      ci.ub
## -0.8287      1.7271     -0.4798     0.6314     -4.2138     2.5564
##
## ---
## Signif. codes:  0 '***' 0.001 '**' 0.01 '*' 0.05 '.' 0.1 ' ' 1
```

## Days per week

### #Study 1

```
mhyear_yes_ds1_vgdaysweek <- subset(mhyear_yes_ds1, select =
c(vgdaysweek)) #Subset 1i data
mhyear_vgdaysweek_m1i <- apply(mhyear_yes_ds1_vgdaysweek, 2, mean)
#Calculate m1i
mhyear_vgdaysweek_sd1i <- apply(mhyear_yes_ds1_vgdaysweek, 2, sd)
#Calculate sd1i
mhyear_vgdaysweek_n1i <- colSums(!is.na(mhyear_yes_ds1_vgdaysweek))
#Calculate n1i
mhyear_no_ds1_vgdaysweek <- subset(mhyear_no_ds1, select =
c(vgdaysweek)) #Subset 2i data
mhyear_vgdaysweek_m2i <- apply(mhyear_no_ds1_vgdaysweek, 2, mean)
#Calculate m2i
mhyear_vgdaysweek_sd2i <- apply(mhyear_no_ds1_vgdaysweek, 2, sd)
#Calculate sd2i
mhyear_vgdaysweek_n2i <- colSums(!is.na(mhyear_no_ds1_vgdaysweek))
#Calculate n2i
ds1mhyear_meta <- data.frame(m1i = mhyear_vgdaysweek_m1i, sd1i =
mhyear_vgdaysweek_sd1i, n1i = mhyear_vgdaysweek_n1i, m2i =
mhyear_vgdaysweek_m2i, sd2i = mhyear_vgdaysweek_sd2i, n2i =
mhyear_vgdaysweek_n2i) #MA dataframe
ds1mhyear_meta <- escalc(measure="MD", m1i = m1i, sd1i = sd1i, n1i =
n1i, m2i = m2i, sd2i = sd2i, n2i = n2i, data=ds1mhyear_meta) #Calculate yi
and vi
```

### #Study 2

```

mhyear_yes_ds2_vgdaysweek <- subset(mhyear_yes_ds2, select =
c(vgdaysweek)) #Subset 1i data
mhyear_vgdaysweek_m1i <- apply(mhyear_yes_ds2_vgdaysweek, 2, mean)
#Calculate m1i
mhyear_vgdaysweek_sd1i <- apply(mhyear_yes_ds2_vgdaysweek, 2, sd)
#Calculate sd1i
mhyear_vgdaysweek_n1i <- colSums(!is.na(mhyear_yes_ds2_vgdaysweek))
#Calculate n1i
mhyear_no_ds2_vgdaysweek <- subset(mhyear_no_ds2, select =
c(vgdaysweek)) #Subset 2i data
mhyear_vgdaysweek_m2i <- apply(mhyear_no_ds2_vgdaysweek, 2, mean)
#Calculate m2i
mhyear_vgdaysweek_sd2i <- apply(mhyear_no_ds2_vgdaysweek, 2, sd)
#Calculate sd2i
mhyear_vgdaysweek_n2i <- colSums(!is.na(mhyear_no_ds2_vgdaysweek))
#Calculate n2i
ds2mhyear_meta <- data.frame(m1i = mhyear_vgdaysweek_m1i, sd1i =
mhyear_vgdaysweek_sd1i, n1i = mhyear_vgdaysweek_n1i, m2i =
mhyear_vgdaysweek_m2i, sd2i = mhyear_vgdaysweek_sd2i, n2i =
mhyear_vgdaysweek_n2i) #MA dataframe
ds2mhyear_meta <- escalc(measure="MD", m1i = m1i, sd1i = sd1i, n1i =
n1i, m2i = m2i, sd2i = sd2i, n2i = n2i, data=ds2mhyear_meta) #Calculate yi
and vi

#FE meta-analysis
(mhyear_meta <- rbind(ds1mhyear_meta, ds2mhyear_meta))

##      m1i  sd1i n1i  m2i  sd2i n2i  yi  vi
## 1 5.333333 2.173707 81 5.284091 2.284122 88 0.0492 0.1176
## 2 4.937500 2.111618 176 4.819672 2.292699 122 0.1178 0.0684

(mhyear_vgdaysweek_meta <- rma(yi=yi, vi=vi, measure="MD",
method="FE", data=mhyear_meta))

##
## Fixed-Effects Model (k = 2)
##
## Test for Heterogeneity:
## Q(df = 1) = 0.0253, p-val = 0.8737
##
## Model Results:
##
## estimate      se      zval      pval      ci.lb      ci.ub
## 0.0926 0.2080 0.4452 0.6561 -0.3150 0.5002
##
## ---
## Signif. codes: 0 '***' 0.001 '**' 0.01 '*' 0.05 '.' 0.1 ' ' 1

```

## Mental health care - month

### Replicated Effect

#### Hours per day

##### Study 1

```
(vghrsday_mhmonth_ds1 <- t.test(vghrsday ~ mhmonth,  
data=ds1anymhscreen))
```

```
##  
## Welch Two Sample t-test  
##  
## data: vghrsday by mhmonth  
## t = -1.4666, df = 38.807, p-value = 0.1505  
## alternative hypothesis: true difference in means is not equal to 0  
## 95 percent confidence interval:  
## -1.5155007 0.2416398  
## sample estimates:  
## mean in group 0 mean in group 1  
## 2.496403 3.133333
```

##### Study 2

```
(vghrsday_mhmonth_ds2 <- t.test(vghrsday ~ mhmonth,  
data=ds2anymhscreen))
```

```
##  
## Welch Two Sample t-test  
##  
## data: vghrsday by mhmonth  
## t = 0.73059, df = 164.41, p-value = 0.4661  
## alternative hypothesis: true difference in means is not equal to 0  
## 95 percent confidence interval:  
## -0.5045699 1.0972713  
## sample estimates:  
## mean in group 0 mean in group 1  
## 3.945701 3.649351
```

#### Hours per week

##### Study 1

```
(vghrsweek_mhmonth_ds1 <- t.test(vghrsweek ~ mhmonth,  
data=ds1anymhscreen))
```

```
##  
## Welch Two Sample t-test
```



```
##
## data: vghrsweek by mhmonth
## t = -1.2268, df = 39.024, p-value = 0.2272
## alternative hypothesis: true difference in means is not equal to 0
## 95 percent confidence interval:
## -10.59930  2.59594
## sample estimates:
## mean in group 0 mean in group 1
##      14.43165      18.43333
```

## Study 2

```
(vghrsweek_mhmonth_ds2 <- t.test(vghrsweek ~ mhmonth,
data=ds2anymhscreen))
```

```
##
## Welch Two Sample t-test
##
## data: vghrsweek by mhmonth
## t = 1.1423, df = 165.09, p-value = 0.255
## alternative hypothesis: true difference in means is not equal to 0
## 95 percent confidence interval:
## -2.326368  8.713746
## sample estimates:
## mean in group 0 mean in group 1
##      21.67421      18.48052
```

## Days per week

### Study 1

```
(vgdaysweek_mhmonth_ds1 <- t.test(vgdaysweek ~ mhmonth,
data=ds1anymhscreen))
```

```
##
## Welch Two Sample t-test
##
## data: vgdaysweek by mhmonth
## t = -0.71491, df = 43.295, p-value = 0.4785
## alternative hypothesis: true difference in means is not equal to 0
## 95 percent confidence interval:
## -1.2029034  0.5731672
## sample estimates:
## mean in group 0 mean in group 1
##      5.251799      5.566667
```

## Study 2

```
(vgdaysweek_mhmonth_ds2 <- t.test(vgdaysweek ~ mhmonth,  
data=ds2anymhscreen))
```

```
##  
## Welch Two Sample t-test  
##  
## data: vgdaysweek by mhmonth  
## t = 0.21881, df = 143.21, p-value = 0.8271  
## alternative hypothesis: true difference in means is not equal to 0  
## 95 percent confidence interval:  
## -0.4886324 0.6102754  
## sample estimates:  
## mean in group 0 mean in group 1  
## 4.904977 4.844156
```

## MD

### Hours per day

```
#Study 1  
mhmonth_yes_ds1_vghrsday <- subset(mhmonth_yes_ds1, select =  
c(vghrsday)) #Subset 1i data  
mhmonth_vghrsday_m1i <- apply(mhmonth_yes_ds1_vghrsday, 2, mean)  
#Calculate m1i  
mhmonth_vghrsday_sd1i <- apply(mhmonth_yes_ds1_vghrsday, 2, sd)  
#Calculate sd1i  
mhmonth_vghrsday_n1i <- colSums(!is.na(mhmonth_yes_ds1_vghrsday))  
#Calculate n1i  
mhmonth_no_ds1_vghrsday <- subset(mhmonth_no_ds1, select =  
c(vghrsday)) #Subset 2i data  
mhmonth_vghrsday_m2i <- apply(mhmonth_no_ds1_vghrsday, 2, mean)  
#Calculate m2i  
mhmonth_vghrsday_sd2i <- apply(mhmonth_no_ds1_vghrsday, 2, sd)  
#Calculate sd2i  
mhmonth_vghrsday_n2i <- colSums(!is.na(mhmonth_no_ds1_vghrsday))  
#Calculate n2i  
ds1mhmonth_meta <- data.frame(m1i = mhmonth_vghrsday_m1i, sd1i =  
mhmonth_vghrsday_sd1i, n1i = mhmonth_vghrsday_n1i, m2i =  
mhmonth_vghrsday_m2i, sd2i = mhmonth_vghrsday_sd2i, n2i =  
mhmonth_vghrsday_n2i) #MA dataframe  
ds1mhmonth_meta <- escalc(measure="MD", m1i = m1i, sd1i = sd1i, n1i =  
n1i, m2i = m2i, sd2i = sd2i, n2i = n2i, data=ds1mhmonth_meta) #Calculate  
yi and vi  
  
#Study 2  
mhmonth_yes_ds2_vghrsday <- subset(mhmonth_yes_ds2, select =  
c(vghrsday)) #Subset 1i data  
mhmonth_vghrsday_m1i <- apply(mhmonth_yes_ds2_vghrsday, 2, mean)
```

```

#Calculate m1i
mhmonth_vghrsday_sd1i <- apply(mhmonth_yes_ds2_vghrsday, 2, sd)
#Calculate sd1i
mhmonth_vghrsday_n1i <- colSums(!is.na(mhmonth_yes_ds2_vghrsday))
#Calculate n1i
mhmonth_no_ds2_vghrsday <- subset(mhmonth_no_ds2, select =
c(vghrsday)) #Subset 2i data
mhmonth_vghrsday_m2i <- apply(mhmonth_no_ds2_vghrsday, 2, mean)
#Calculate m2i
mhmonth_vghrsday_sd2i <- apply(mhmonth_no_ds2_vghrsday, 2, sd)
#Calculate sd2i
mhmonth_vghrsday_n2i <- colSums(!is.na(mhmonth_no_ds2_vghrsday))
#Calculate n2i
ds2mhmonth_meta <- data.frame(m1i = mhmonth_vghrsday_m1i, sd1i =
mhmonth_vghrsday_sd1i, n1i = mhmonth_vghrsday_n1i, m2i =
mhmonth_vghrsday_m2i, sd2i = mhmonth_vghrsday_sd2i, n2i =
mhmonth_vghrsday_n2i) #MA dataframe
ds2mhmonth_meta <- escalc(measure="MD", m1i = m1i, sd1i = sd1i, n1i =
n1i, m2i = m2i, sd2i = sd2i, n2i = n2i, data=ds2mhmonth_meta) #Calculate
yi and vi

```

#### #FE meta-analysis

```

(mhmonth_meta <- rbind(ds1mhmonth_meta, ds2mhmonth_meta))

##      m1i  sd1i n1i  m2i  sd2i n2i  yi  vi
## 1 3.133333 2.208656 30 2.496403 1.901083 139 0.6369 0.1886
## 2 3.649351 2.864328 77 3.945701 3.579835 221 -0.2964 0.1645

(mhmonth_vghrsday_meta <- rma(yi=yi, vi=vi, measure="MD",
method="FE", data=mhmonth_meta))

```

```

##
## Fixed-Effects Model (k = 2)
##
## Test for Heterogeneity:
## Q(df = 1) = 2.4665, p-val = 0.1163
##
## Model Results:
##
## estimate    se    zval    pval  ci.lb  ci.ub
## 0.1385 0.2964 0.4672 0.6404 -0.4425 0.7195
##
## ---
## Signif. codes:  0 '***' 0.001 '**' 0.01 '*' 0.05 '.' 0.1 ' ' 1

```

## Hours per week

### #Study 1

```

mhmonth_yes_ds1_vghrsweek <- subset(mhmonth_yes_ds1, select =
c(vghrsweek)) #Subset 1i data

```

```

mhmonth_vghrsweek_m1i <- apply(mhmonth_yes_ds1_vghrsweek, 2, mean)
#Calculate m1i
mhmonth_vghrsweek_sd1i <- apply(mhmonth_yes_ds1_vghrsweek, 2, sd)
#Calculate sd1i
mhmonth_vghrsweek_n1i <- colSums(!is.na(mhmonth_yes_ds1_vghrsweek))
#Calculate n1i
mhmonth_no_ds1_vghrsweek <- subset(mhmonth_no_ds1, select =
c(vghrsweek)) #Subset 2i data
mhmonth_vghrsweek_m2i <- apply(mhmonth_no_ds1_vghrsweek, 2, mean)
#Calculate m2i
mhmonth_vghrsweek_sd2i <- apply(mhmonth_no_ds1_vghrsweek, 2, sd)
#Calculate sd2i
mhmonth_vghrsweek_n2i <- colSums(!is.na(mhmonth_no_ds1_vghrsweek))
#Calculate n2i
ds1mhmonth_meta <- data.frame(m1i = mhmonth_vghrsweek_m1i, sd1i =
mhmonth_vghrsweek_sd1i, n1i = mhmonth_vghrsweek_n1i, m2i =
mhmonth_vghrsweek_m2i, sd2i = mhmonth_vghrsweek_sd2i, n2i =
mhmonth_vghrsweek_n2i) #MA dataframe
ds1mhmonth_meta <- escalc(measure="MD", m1i = m1i, sd1i = sd1i, n1i =
n1i, m2i = m2i, sd2i = sd2i, n2i = n2i, data=ds1mhmonth_meta) #Calculate
yi and vi

```

#### *#Study 2*

```

mhmonth_yes_ds2_vghrsweek <- subset(mhmonth_yes_ds2, select =
c(vghrsweek)) #Subset 1i data
mhmonth_vghrsweek_m1i <- apply(mhmonth_yes_ds2_vghrsweek, 2, mean)
#Calculate m1i
mhmonth_vghrsweek_sd1i <- apply(mhmonth_yes_ds2_vghrsweek, 2, sd)
#Calculate sd1i
mhmonth_vghrsweek_n1i <- colSums(!is.na(mhmonth_yes_ds2_vghrsweek))
#Calculate n1i
mhmonth_no_ds2_vghrsweek <- subset(mhmonth_no_ds2, select =
c(vghrsweek)) #Subset 2i data
mhmonth_vghrsweek_m2i <- apply(mhmonth_no_ds2_vghrsweek, 2, mean)
#Calculate m2i
mhmonth_vghrsweek_sd2i <- apply(mhmonth_no_ds2_vghrsweek, 2, sd)
#Calculate sd2i
mhmonth_vghrsweek_n2i <- colSums(!is.na(mhmonth_no_ds2_vghrsweek))
#Calculate n2i
ds2mhmonth_meta <- data.frame(m1i = mhmonth_vghrsweek_m1i, sd1i =
mhmonth_vghrsweek_sd1i, n1i = mhmonth_vghrsweek_n1i, m2i =
mhmonth_vghrsweek_m2i, sd2i = mhmonth_vghrsweek_sd2i, n2i =
mhmonth_vghrsweek_n2i) #MA dataframe
ds2mhmonth_meta <- escalc(measure="MD", m1i = m1i, sd1i = sd1i, n1i =
n1i, m2i = m2i, sd2i = sd2i, n2i = n2i, data=ds2mhmonth_meta) #Calculate
yi and vi

```

#### *#FE meta-analysis*

```

(mhmonth_meta <- rbind(ds1mhmonth_meta, ds2mhmonth_meta))

```

```
##      m1i  sd1i n1i  m2i  sd2i n2i  yi  vi
## 1 18.43333 16.56478 30 14.43165 14.40765 139 4.0017 10.6398
## 2 18.48052 19.71415 77 21.67421 24.73721 221 -3.1937 7.8163
```

```
(mhmonth_vghrsweek_meta <- rma(yi=yi, vi=vi, measure="MD",
method="FE", data=mhmonth_meta))
```

```
##
## Fixed-Effects Model (k = 2)
##
## Test for Heterogeneity:
## Q(df = 1) = 2.8052, p-val = 0.0940
##
## Model Results:
##
## estimate      se    zval    pval  ci.lb  ci.ub
## -0.1464  2.1227 -0.0690  0.9450 -4.3069  4.0141
##
## ---
## Signif. codes:  0 '***' 0.001 '**' 0.01 '*' 0.05 '.' 0.1 ' ' 1
```

## Days per week

### #Study 1

```
mhmonth_yes_ds1_vgdaysweek <- subset(mhmonth_yes_ds1, select =
c(vgdaysweek)) #Subset 1i data
mhmonth_vgdaysweek_m1i <- apply(mhmonth_yes_ds1_vgdaysweek, 2,
mean) #Calculate m1i
mhmonth_vgdaysweek_sd1i <- apply(mhmonth_yes_ds1_vgdaysweek, 2, sd)
#Calculate sd1i
mhmonth_vgdaysweek_n1i <- colSums(!
is.na(mhmonth_yes_ds1_vgdaysweek)) #Calculate n1i
mhmonth_no_ds1_vgdaysweek <- subset(mhmonth_no_ds1, select =
c(vgdaysweek)) #Subset 2i data
mhmonth_vgdaysweek_m2i <- apply(mhmonth_no_ds1_vgdaysweek, 2,
mean) #Calculate m2i
mhmonth_vgdaysweek_sd2i <- apply(mhmonth_no_ds1_vgdaysweek, 2, sd)
#Calculate sd2i
mhmonth_vgdaysweek_n2i <- colSums(!
is.na(mhmonth_no_ds1_vgdaysweek)) #Calculate n2i
ds1mhmonth_meta <- data.frame(m1i = mhmonth_vgdaysweek_m1i, sd1i =
mhmonth_vgdaysweek_sd1i, n1i = mhmonth_vgdaysweek_n1i, m2i =
mhmonth_vgdaysweek_m2i, sd2i = mhmonth_vgdaysweek_sd2i, n2i =
mhmonth_vgdaysweek_n2i) #MA dataframe
ds1mhmonth_meta <- escalc(measure="MD", m1i = m1i, sd1i = sd1i, n1i =
n1i, m2i = m2i, sd2i = sd2i, n2i = n2i, data=ds1mhmonth_meta) #Calculate
yi and vi
```

### #Study 2

```

mhmonth_yes_ds2_vgdaysweek <- subset(mhmonth_yes_ds2, select =
c(vgdaysweek)) #Subset 1i data
mhmonth_vgdaysweek_m1i <- apply(mhmonth_yes_ds2_vgdaysweek, 2,
mean) #Calculate m1i
mhmonth_vgdaysweek_sd1i <- apply(mhmonth_yes_ds2_vgdaysweek, 2, sd)
#Calculate sd1i
mhmonth_vgdaysweek_n1i <- colSums(!
is.na(mhmonth_yes_ds2_vgdaysweek)) #Calculate n1i
mhmonth_no_ds2_vgdaysweek <- subset(mhmonth_no_ds2, select =
c(vgdaysweek)) #Subset 2i data
mhmonth_vgdaysweek_m2i <- apply(mhmonth_no_ds2_vgdaysweek, 2,
mean) #Calculate m2i
mhmonth_vgdaysweek_sd2i <- apply(mhmonth_no_ds2_vgdaysweek, 2, sd)
#Calculate sd2i
mhmonth_vgdaysweek_n2i <- colSums(!
is.na(mhmonth_no_ds2_vgdaysweek)) #Calculate n2i
ds2mhmonth_meta <- data.frame(m1i = mhmonth_vgdaysweek_m1i, sd1i =
mhmonth_vgdaysweek_sd1i, n1i = mhmonth_vgdaysweek_n1i, m2i =
mhmonth_vgdaysweek_m2i, sd2i = mhmonth_vgdaysweek_sd2i, n2i =
mhmonth_vgdaysweek_n2i) #MA dataframe
ds2mhmonth_meta <- escalc(measure="MD", m1i = m1i, sd1i = sd1i, n1i =
n1i, m2i = m2i, sd2i = sd2i, n2i = n2i, data=ds2mhmonth_meta) #Calculate
yi and vi

#FE meta-analysis
(mhmonth_meta <- rbind(ds1mhmonth_meta, ds2mhmonth_meta))

##      m1i  sd1i n1i   m2i  sd2i n2i   yi   vi
## 1 5.566667 2.176415 30 5.251799 2.239609 139 0.3149 0.1940
## 2 4.844156 2.052373 77 4.904977 2.233021 221 -0.0608 0.0773

(mhmonth_vgdaysweek_meta <- rma(yi=yi, vi=vi, measure="MD",
method="FE", data=mhmonth_meta))

##
## Fixed-Effects Model (k = 2)
##
## Test for Heterogeneity:
## Q(df = 1) = 0.5204, p-val = 0.4707
##
## Model Results:
##
## estimate    se    zval    pval  ci.lb  ci.ub
## 0.0462  0.2351  0.1965  0.8442 -0.4145  0.5069
##
## ---
## Signif. codes:  0 '***' 0.001 '**' 0.01 '*' 0.05 '.' 0.1 ' ' 1

```

## PTSD care - discharge

### Replicated Effect

#### Hours per day

##### Study 1

```
(vghrsday_ptsddis_ds1 <- t.test(vghrsday ~ mhdis, data=ds1ptsd))
```

```
##  
## Welch Two Sample t-test  
##  
## data: vghrsday by mhdis  
## t = 0.66454, df = 64.56, p-value = 0.5087  
## alternative hypothesis: true difference in means is not equal to 0  
## 95 percent confidence interval:  
## -0.5226871 1.0438913  
## sample estimates:  
## mean in group 0 mean in group 1  
## 2.756098 2.495495
```

##### Study 2

```
(vghrsday_ptsddis_ds2 <- t.test(vghrsday ~ mhdis, data=ds2ptsd))
```

```
##  
## Welch Two Sample t-test  
##  
## data: vghrsday by mhdis  
## t = -1.9646, df = 93.121, p-value = 0.05244  
## alternative hypothesis: true difference in means is not equal to 0  
## 95 percent confidence interval:  
## -1.90364795 0.01021166  
## sample estimates:  
## mean in group 0 mean in group 1  
## 3.285714 4.232432
```

#### Hours per week

##### Study 1

```
(vghrsweek_ptsddis_ds1 <- t.test(vghrsweek ~ mhdis, data=ds1ptsd))
```

```
##  
## Welch Two Sample t-test  
##  
## data: vghrsweek by mhdis  
## t = 0.6953, df = 62.304, p-value = 0.4895
```

```
## alternative hypothesis: true difference in means is not equal to 0
## 95 percent confidence interval:
## -3.958218 8.181026
## sample estimates:
## mean in group 0 mean in group 1
## 16.21951 14.10811
```

## Study 2

```
(vghrsweek_ptsddis_ds2 <- t.test(vghrsweek ~ mhdis, data=ds2ptsd))
```

```
##
## Welch Two Sample t-test
##
## data: vghrsweek by mhdis
## t = -2.4482, df = 104.85, p-value = 0.01602
## alternative hypothesis: true difference in means is not equal to 0
## 95 percent confidence interval:
## -13.96804 -1.46697
## sample estimates:
## mean in group 0 mean in group 1
## 16.30952 24.02703
```

## Days per week

### Study 1

```
(vgdaysweek_ptsddis_ds1 <- t.test(vgdaysweek ~ mhdis, data=ds1ptsd))
```

```
##
## Welch Two Sample t-test
##
## data: vgdaysweek by mhdis
## t = -0.67344, df = 70.145, p-value = 0.5029
## alternative hypothesis: true difference in means is not equal to 0
## 95 percent confidence interval:
## -1.121152 0.555123
## sample estimates:
## mean in group 0 mean in group 1
## 4.951220 5.234234
```

### Study 2

```
(vgdaysweek_ptsddis_ds2 <- t.test(vgdaysweek ~ mhdis, data=ds2ptsd))
```

```
##
## Welch Two Sample t-test
##
```



```

## data: vgdaysweek by mhdis
## t = -1.3444, df = 57.315, p-value = 0.1841
## alternative hypothesis: true difference in means is not equal to 0
## 95 percent confidence interval:
## -1.3035798 0.2562181
## sample estimates:
## mean in group 0 mean in group 1
##      4.595238      5.118919

```

## MD

### Hours per day

```

#Study 1
ptsddis_yes_ds1_vghrsday <- subset(ptsddis_yes_ds1, select = c(vghrsday))
#Subset 1i data
ptsddis_vghrsday_m1i <- apply(ptsddis_yes_ds1_vghrsday, 2, mean)
#Calculate m1i
ptsddis_vghrsday_sd1i <- apply(ptsddis_yes_ds1_vghrsday, 2, sd) #Calculate
sd1i
ptsddis_vghrsday_n1i <- colSums(!is.na(ptsddis_yes_ds1_vghrsday))
#Calculate n1i
ptsddis_no_ds1_vghrsday <- subset(ptsddis_no_ds1, select = c(vghrsday))
#Subset 2i data
ptsddis_vghrsday_m2i <- apply(ptsddis_no_ds1_vghrsday, 2, mean)
#Calculate m2i
ptsddis_vghrsday_sd2i <- apply(ptsddis_no_ds1_vghrsday, 2, sd) #Calculate
sd2i
ptsddis_vghrsday_n2i <- colSums(!is.na(ptsddis_no_ds1_vghrsday))
#Calculate n2i
ds1ptsddis_meta <- data.frame(m1i = ptsddis_vghrsday_m1i, sd1i =
ptsddis_vghrsday_sd1i, n1i = ptsddis_vghrsday_n1i, m2i =
ptsddis_vghrsday_m2i, sd2i = ptsddis_vghrsday_sd2i, n2i =
ptsddis_vghrsday_n2i) #MA dataframe
ds1ptsddis_meta <- escalc(measure="MD", m1i = m1i, sd1i = sd1i, n1i =
n1i, m2i = m2i, sd2i = sd2i, n2i = n2i, data=ds1ptsddis_meta) #Calculate yi
and vi

#Study 2
ptsddis_yes_ds2_vghrsday <- subset(ptsddis_yes_ds2, select = c(vghrsday))
#Subset 1i data
ptsddis_vghrsday_m1i <- apply(ptsddis_yes_ds2_vghrsday, 2, mean)
#Calculate m1i
ptsddis_vghrsday_sd1i <- apply(ptsddis_yes_ds2_vghrsday, 2, sd) #Calculate
sd1i
ptsddis_vghrsday_n1i <- colSums(!is.na(ptsddis_yes_ds2_vghrsday))
#Calculate n1i
ptsddis_no_ds2_vghrsday <- subset(ptsddis_no_ds2, select = c(vghrsday))
#Subset 2i data

```

```

ptsddis_vghrsday_m2i <- apply(ptsddis_no_ds2_vghrsday, 2, mean)
#Calculate m2i
ptsddis_vghrsday_sd2i <- apply(ptsddis_no_ds2_vghrsday, 2, sd) #Calculate
sd2i
ptsddis_vghrsday_n2i <- colSums(!is.na(ptsddis_no_ds2_vghrsday))
#Calculate n2i
ds2ptsddis_meta <- data.frame(m1i = ptsddis_vghrsday_m1i, sd1i =
ptsddis_vghrsday_sd1i, n1i = ptsddis_vghrsday_n1i, m2i =
ptsddis_vghrsday_m2i, sd2i = ptsddis_vghrsday_sd2i, n2i =
ptsddis_vghrsday_n2i) #MA dataframe
ds2ptsddis_meta <- escalc(measure="MD", m1i = m1i, sd1i = sd1i, n1i =
n1i, m2i = m2i, sd2i = sd2i, n2i = n2i, data=ds2ptsddis_meta) #Calculate yi
and vi

#FE meta-analysis
(ptsddis_meta <- rbind(ds1ptsddis_meta, ds2ptsddis_meta))

##      m1i  sd1i n1i   m2i  sd2i n2i   yi   vi
## 1 2.495495 1.958078 111 2.756098 2.211114 41 -0.2606 0.1538
## 2 4.232432 3.923872 185 3.285714 2.501567 42  0.9467 0.2322

(ptsddis_vghrsday_meta <- rma(yi=yi, vi=vi, measure="MD", method="FE",
data=ptsddis_meta))

##
## Fixed-Effects Model (k = 2)
##
## Test for Heterogeneity:
## Q(df = 1) = 3.7761, p-val = 0.0520
##
## Model Results:
##
## estimate    se    zval    pval  ci.lb  ci.ub
## 0.2204    0.3042  0.7246  0.4687 -0.3758  0.8166
##
## ---
## Signif. codes:  0 '***' 0.001 '**' 0.01 '*' 0.05 '.' 0.1 ' ' 1

```

## Hours per week

```

#Study 1
ptsddis_yes_ds1_vghrsweek <- subset(ptsddis_yes_ds1, select =
c(vghrsweek)) #Subset 1i data
ptsddis_vghrsweek_m1i <- apply(ptsddis_yes_ds1_vghrsweek, 2, mean)
#Calculate m1i
ptsddis_vghrsweek_sd1i <- apply(ptsddis_yes_ds1_vghrsweek, 2, sd)
#Calculate sd1i
ptsddis_vghrsweek_n1i <- colSums(!is.na(ptsddis_yes_ds1_vghrsweek))
#Calculate n1i
ptsddis_no_ds1_vghrsweek <- subset(ptsddis_no_ds1, select = c(vghrsweek))

```

```

#Subset 2i data
ptsddis_vghrsweek_m2i <- apply(ptsddis_no_ds1_vghrsweek, 2, mean)
#Calculate m2i
ptsddis_vghrsweek_sd2i <- apply(ptsddis_no_ds1_vghrsweek, 2, sd)
#Calculate sd2i
ptsddis_vghrsweek_n2i <- colSums(!is.na(ptsddis_no_ds1_vghrsweek))
#Calculate n2i
ds1ptsddis_meta <- data.frame(m1i = ptsddis_vghrsweek_m1i, sd1i =
ptsddis_vghrsweek_sd1i, n1i = ptsddis_vghrsweek_n1i, m2i =
ptsddis_vghrsweek_m2i, sd2i = ptsddis_vghrsweek_sd2i, n2i =
ptsddis_vghrsweek_n2i) #MA dataframe
ds1ptsddis_meta <- escalc(measure="MD", m1i = m1i, sd1i = sd1i, n1i =
n1i, m2i = m2i, sd2i = sd2i, n2i = n2i, data=ds1ptsddis_meta) #Calculate yi
and vi

#Study 2
ptsddis_yes_ds2_vghrsweek <- subset(ptsddis_yes_ds2, select =
c(vghrsweek)) #Subset 1i data
ptsddis_vghrsweek_m1i <- apply(ptsddis_yes_ds2_vghrsweek, 2, mean)
#Calculate m1i
ptsddis_vghrsweek_sd1i <- apply(ptsddis_yes_ds2_vghrsweek, 2, sd)
#Calculate sd1i
ptsddis_vghrsweek_n1i <- colSums(!is.na(ptsddis_yes_ds2_vghrsweek))
#Calculate n1i
ptsddis_no_ds2_vghrsweek <- subset(ptsddis_no_ds2, select = c(vghrsweek))
#Subset 2i data
ptsddis_vghrsweek_m2i <- apply(ptsddis_no_ds2_vghrsweek, 2, mean)
#Calculate m2i
ptsddis_vghrsweek_sd2i <- apply(ptsddis_no_ds2_vghrsweek, 2, sd)
#Calculate sd2i
ptsddis_vghrsweek_n2i <- colSums(!is.na(ptsddis_no_ds2_vghrsweek))
#Calculate n2i
ds2ptsddis_meta <- data.frame(m1i = ptsddis_vghrsweek_m1i, sd1i =
ptsddis_vghrsweek_sd1i, n1i = ptsddis_vghrsweek_n1i, m2i =
ptsddis_vghrsweek_m2i, sd2i = ptsddis_vghrsweek_sd2i, n2i =
ptsddis_vghrsweek_n2i) #MA dataframe
ds2ptsddis_meta <- escalc(measure="MD", m1i = m1i, sd1i = sd1i, n1i =
n1i, m2i = m2i, sd2i = sd2i, n2i = n2i, data=ds2ptsddis_meta) #Calculate yi
and vi

#FE meta-analysis
(ptsddis_meta <- rbind(ds1ptsddis_meta, ds2ptsddis_meta))

##      m1i  sd1i n1i   m2i  sd2i n2i   yi   vi
## 1 14.10811 14.61528 111 16.21951 17.29669 41 -2.1114 9.2213
## 2 24.02703 27.27107 185 16.30952 15.76425 42  7.7175 9.9370

(ptsddis_vghrsweek_meta <- rma(yi=yi, vi=vi, measure="MD", method="FE",
data=ptsddis_meta))

```

```

##
## Fixed-Effects Model (k = 2)
##
## Test for Heterogeneity:
## Q(df = 1) = 5.0426, p-val = 0.0247
##
## Model Results:
##
## estimate      se      zval      pval      ci.lb      ci.ub
## 2.6195 2.1870 1.1978 0.2310 -1.6669 6.9059
##
## ---
## Signif. codes:  0 '***' 0.001 '**' 0.01 '*' 0.05 '.' 0.1 ' ' 1

```

## Days per week

### #Study 1

```

ptsddis_yes_ds1_vgdaysweek <- subset(ptsddis_yes_ds1, select =
c(vgdaysweek)) #Subset 1i data
ptsddis_vgdaysweek_m1i <- apply(ptsddis_yes_ds1_vgdaysweek, 2, mean)
#Calculate m1i
ptsddis_vgdaysweek_sd1i <- apply(ptsddis_yes_ds1_vgdaysweek, 2, sd)
#Calculate sd1i
ptsddis_vgdaysweek_n1i <- colSums(!is.na(ptsddis_yes_ds1_vgdaysweek))
#Calculate n1i
ptsddis_no_ds1_vgdaysweek <- subset(ptsddis_no_ds1, select =
c(vgdaysweek)) #Subset 2i data
ptsddis_vgdaysweek_m2i <- apply(ptsddis_no_ds1_vgdaysweek, 2, mean)
#Calculate m2i
ptsddis_vgdaysweek_sd2i <- apply(ptsddis_no_ds1_vgdaysweek, 2, sd)
#Calculate sd2i
ptsddis_vgdaysweek_n2i <- colSums(!is.na(ptsddis_no_ds1_vgdaysweek))
#Calculate n2i
ds1ptsddis_meta <- data.frame(m1i = ptsddis_vgdaysweek_m1i, sd1i =
ptsddis_vgdaysweek_sd1i, n1i = ptsddis_vgdaysweek_n1i, m2i =
ptsddis_vgdaysweek_m2i, sd2i = ptsddis_vgdaysweek_sd2i, n2i =
ptsddis_vgdaysweek_n2i) #MA dataframe
ds1ptsddis_meta <- escalc(measure="MD", m1i = m1i, sd1i = sd1i, n1i =
n1i, m2i = m2i, sd2i = sd2i, n2i = n2i, data=ds1ptsddis_meta) #Calculate yi
and vi

```

### #Study 2

```

ptsddis_yes_ds2_vgdaysweek <- subset(ptsddis_yes_ds2, select =
c(vgdaysweek)) #Subset 1i data
ptsddis_vgdaysweek_m1i <- apply(ptsddis_yes_ds2_vgdaysweek, 2, mean)
#Calculate m1i
ptsddis_vgdaysweek_sd1i <- apply(ptsddis_yes_ds2_vgdaysweek, 2, sd)
#Calculate sd1i
ptsddis_vgdaysweek_n1i <- colSums(!is.na(ptsddis_yes_ds2_vgdaysweek))

```

```

#Calculate n1i
ptsddis_no_ds2_vgdaysweek <- subset(ptsddis_no_ds2, select =
c(vgdaysweek)) #Subset 2i data
ptsddis_vgdaysweek_m2i <- apply(ptsddis_no_ds2_vgdaysweek, 2, mean)
#Calculate m2i
ptsddis_vgdaysweek_sd2i <- apply(ptsddis_no_ds2_vgdaysweek, 2, sd)
#Calculate sd2i
ptsddis_vgdaysweek_n2i <- colSums(!is.na(ptsddis_no_ds2_vgdaysweek))
#Calculate n2i
ds2ptsddis_meta <- data.frame(m1i = ptsddis_vgdaysweek_m1i, sd1i =
ptsddis_vgdaysweek_sd1i, n1i = ptsddis_vgdaysweek_n1i, m2i =
ptsddis_vgdaysweek_m2i, sd2i = ptsddis_vgdaysweek_sd2i, n2i =
ptsddis_vgdaysweek_n2i) #MA dataframe
ds2ptsddis_meta <- escalc(measure="MD", m1i = m1i, sd1i = sd1i, n1i =
n1i, m2i = m2i, sd2i = sd2i, n2i = n2i, data=ds2ptsddis_meta) #Calculate yi
and vi

#FE meta-analysis
(ptsddis_meta <- rbind(ds1ptsddis_meta, ds2ptsddis_meta))

##      m1i  sd1i n1i  m2i  sd2i n2i  yi  vi
## 1 5.234234 2.264167 111 4.951220 2.312479 41 0.2830 0.1766
## 2 5.118919 2.102514 185 4.595238 2.317058 42 0.5237 0.1517

(ptsddis_vgdaysweek_meta <- rma(yi=yi, vi=vi, measure="MD",
method="FE", data=ptsddis_meta))

##
## Fixed-Effects Model (k = 2)
##
## Test for Heterogeneity:
## Q(df = 1) = 0.1764, p-val = 0.6745
##
## Model Results:
##
## estimate    se    zval    pval  ci.lb  ci.ub
## 0.4125  0.2857  1.4438  0.1488 -0.1474  0.9724
##
## ---
## Signif. codes:  0 '***' 0.001 '**' 0.01 '*' 0.05 '.' 0.1 ' ' 1

```

## PTSD care - year

### Replicated Effect

#### Hours per day

##### Study 1

```
(vghrsday_ptsdyear_ds1 <- t.test(vghrsday ~ mhyear, data=ds1ptsd))
```

```
##  
## Welch Two Sample t-test  
##  
## data: vghrsday by mhyear  
## t = 1.4862, df = 146.23, p-value = 0.1394  
## alternative hypothesis: true difference in means is not equal to 0  
## 95 percent confidence interval:  
## -0.1599992 1.1303888  
## sample estimates:  
## mean in group 0 mean in group 1  
## 2.805195 2.320000
```

##### Study 2

```
(vghrsday_ptsdyear_ds2 <- t.test(vghrsday ~ mhyear, data=ds2ptsd))
```

```
##  
## Welch Two Sample t-test  
##  
## data: vghrsday by mhyear  
## t = -0.33394, df = 177.32, p-value = 0.7388  
## alternative hypothesis: true difference in means is not equal to 0  
## 95 percent confidence interval:  
## -1.1420259 0.8114631  
## sample estimates:  
## mean in group 0 mean in group 1  
## 3.948052 4.113333
```

#### Hours per week

##### Study 1

```
(vghrsweek_ptsdyear_ds1 <- t.test(vghrsweek ~ mhyear, data=ds1ptsd))
```

```
##  
## Welch Two Sample t-test  
##  
## data: vghrsweek by mhyear  
## t = 1.4665, df = 143.08, p-value = 0.1447
```

```
## alternative hypothesis: true difference in means is not equal to 0
## 95 percent confidence interval:
## -1.261923  8.516988
## sample estimates:
## mean in group 0 mean in group 1
##      16.46753      12.84000
```

## Study 2

```
(vghrsweek_ptsdyear_ds2 <- t.test(vghrsweek ~ mhyear, data=ds2ptsd))
```

```
##
## Welch Two Sample t-test
##
## data: vghrsweek by mhyear
## t = 0.044351, df = 168.57, p-value = 0.9647
## alternative hypothesis: true difference in means is not equal to 0
## 95 percent confidence interval:
## -6.728306  7.037570
## sample estimates:
## mean in group 0 mean in group 1
##      22.70130      22.54667
```

## Days per week

### Study 1

```
(vgdaysweek_ptsdyear_ds1 <- t.test(vgdaysweek ~ mhyear, data=ds1ptsd))
```

```
##
## Welch Two Sample t-test
##
## data: vgdaysweek by mhyear
## t = -0.36734, df = 149.88, p-value = 0.7139
## alternative hypothesis: true difference in means is not equal to 0
## 95 percent confidence interval:
## -0.8659945  0.5944794
## sample estimates:
## mean in group 0 mean in group 1
##      5.090909      5.226667
```

### Study 2

```
(vgdaysweek_ptsdyear_ds2 <- t.test(vgdaysweek ~ mhyear, data=ds2ptsd))
```

```
##
## Welch Two Sample t-test
##
```

```

## data: vgdaysweek by mhyear
## t = 0.14589, df = 142.23, p-value = 0.8842
## alternative hypothesis: true difference in means is not equal to 0
## 95 percent confidence interval:
## -0.5682531 0.6588159
## sample estimates:
## mean in group 0 mean in group 1
##      5.051948      5.006667

```

## MD

### Hours per day

```

#Study 1
ptsdyear_yes_ds1_vghrsday <- subset(ptsdyear_yes_ds1, select =
c(vghrsday)) #Subset 1i data
ptsdyear_vghrsday_m1i <- apply(ptsdyear_yes_ds1_vghrsday, 2, mean)
#Calculate m1i
ptsdyear_vghrsday_sd1i <- apply(ptsdyear_yes_ds1_vghrsday, 2, sd)
#Calculate sd1i
ptsdyear_vghrsday_n1i <- colSums(!is.na(ptsdyear_yes_ds1_vghrsday))
#Calculate n1i
ptsdyear_no_ds1_vghrsday <- subset(ptsdyear_no_ds1, select = c(vghrsday))
#Subset 2i data
ptsdyear_vghrsday_m2i <- apply(ptsdyear_no_ds1_vghrsday, 2, mean)
#Calculate m2i
ptsdyear_vghrsday_sd2i <- apply(ptsdyear_no_ds1_vghrsday, 2, sd)
#Calculate sd2i
ptsdyear_vghrsday_n2i <- colSums(!is.na(ptsdyear_no_ds1_vghrsday))
#Calculate n2i
ds1ptsdyear_meta <- data.frame(m1i = ptsdyear_vghrsday_m1i, sd1i =
ptsdyear_vghrsday_sd1i, n1i = ptsdyear_vghrsday_n1i, m2i =
ptsdyear_vghrsday_m2i, sd2i = ptsdyear_vghrsday_sd2i, n2i =
ptsdyear_vghrsday_n2i) #MA dataframe
ds1ptsdyear_meta <- escalc(measure="MD", m1i = m1i, sd1i = sd1i, n1i =
n1i, m2i = m2i, sd2i = sd2i, n2i = n2i, data=ds1ptsdyear_meta) #Calculate
yi and vi

#Study 2
ptsdyear_yes_ds2_vghrsday <- subset(ptsdyear_yes_ds2, select =
c(vghrsday)) #Subset 1i data
ptsdyear_vghrsday_m1i <- apply(ptsdyear_yes_ds2_vghrsday, 2, mean)
#Calculate m1i
ptsdyear_vghrsday_sd1i <- apply(ptsdyear_yes_ds2_vghrsday, 2, sd)
#Calculate sd1i
ptsdyear_vghrsday_n1i <- colSums(!is.na(ptsdyear_yes_ds2_vghrsday))
#Calculate n1i
ptsdyear_no_ds2_vghrsday <- subset(ptsdyear_no_ds2, select = c(vghrsday))
#Subset 2i data

```



```

ptsdyear_vghrsday_m2i <- apply(ptsdyear_no_ds2_vghrsday, 2, mean)
#Calculate m2i
ptsdyear_vghrsday_sd2i <- apply(ptsdyear_no_ds2_vghrsday, 2, sd)
#Calculate sd2i
ptsdyear_vghrsday_n2i <- colSums(!is.na(ptsdyear_no_ds2_vghrsday))
#Calculate n2i
ds2ptsdyear_meta <- data.frame(m1i = ptsdyear_vghrsday_m1i, sd1i =
ptsdyear_vghrsday_sd1i, n1i = ptsdyear_vghrsday_n1i, m2i =
ptsdyear_vghrsday_m2i, sd2i = ptsdyear_vghrsday_sd2i, n2i =
ptsdyear_vghrsday_n2i) #MA dataframe
ds2ptsdyear_meta <- escalc(measure="MD", m1i = m1i, sd1i = sd1i, n1i =
n1i, m2i = m2i, sd2i = sd2i, n2i = n2i, data=ds2ptsdyear_meta) #Calculate
yi and vi

#FE meta-analysis
(ptsdyear_meta <- rbind(ds1ptsdyear_meta, ds2ptsdyear_meta))

##      m1i  sd1i n1i   m2i  sd2i n2i   yi   vi
## 1 2.320000 1.817036 75 2.805195 2.194724 77 -0.4852 0.1066
## 2 4.113333 3.914414 150 3.948052 3.316213 77 0.1653 0.2450

(ptsdyear_vghrsday_meta <- rma(yi=yi, vi=vi, measure="MD", method="FE",
data=ptsdyear_meta))

##
## Fixed-Effects Model (k = 2)
##
## Test for Heterogeneity:
## Q(df = 1) = 1.2036, p-val = 0.2726
##
## Model Results:
##
## estimate      se    zval    pval  ci.lb  ci.ub
## -0.2880  0.2725 -1.0568  0.2906 -0.8221  0.2461
##
## ---
## Signif. codes:  0 '***' 0.001 '**' 0.01 '*' 0.05 '.' 0.1 ' ' 1

```

## Hours per week

```

#Study 1
ptsdyear_yes_ds1_vghrsweek <- subset(ptsdyear_yes_ds1, select =
c(vghrsweek)) #Subset 1i data
ptsdyear_vghrsweek_m1i <- apply(ptsdyear_yes_ds1_vghrsweek, 2, mean)
#Calculate m1i
ptsdyear_vghrsweek_sd1i <- apply(ptsdyear_yes_ds1_vghrsweek, 2, sd)
#Calculate sd1i
ptsdyear_vghrsweek_n1i <- colSums(!is.na(ptsdyear_yes_ds1_vghrsweek))
#Calculate n1i
ptsdyear_no_ds1_vghrsweek <- subset(ptsdyear_no_ds1, select =

```

```

c(vghrsweek)) #Subset 2i data
ptsdyear_vghrsweek_m2i <- apply(ptsdyear_no_ds1_vghrsweek, 2, mean)
#Calculate m2i
ptsdyear_vghrsweek_sd2i <- apply(ptsdyear_no_ds1_vghrsweek, 2, sd)
#Calculate sd2i
ptsdyear_vghrsweek_n2i <- colSums(!is.na(ptsdyear_no_ds1_vghrsweek))
#Calculate n2i
ds1ptsdyear_meta <- data.frame(m1i = ptsdyear_vghrsweek_m1i, sd1i =
ptsdyear_vghrsweek_sd1i, n1i = ptsdyear_vghrsweek_n1i, m2i =
ptsdyear_vghrsweek_m2i, sd2i = ptsdyear_vghrsweek_sd2i, n2i =
ptsdyear_vghrsweek_n2i) #MA dataframe
ds1ptsdyear_meta <- escalc(measure="MD", m1i = m1i, sd1i = sd1i, n1i =
n1i, m2i = m2i, sd2i = sd2i, n2i = n2i, data=ds1ptsdyear_meta) #Calculate
yi and vi

```

### #Study 2

```

ptsdyear_yes_ds2_vghrsweek <- subset(ptsdyear_yes_ds2, select =
c(vghrsweek)) #Subset 1i data
ptsdyear_vghrsweek_m1i <- apply(ptsdyear_yes_ds2_vghrsweek, 2, mean)
#Calculate m1i
ptsdyear_vghrsweek_sd1i <- apply(ptsdyear_yes_ds2_vghrsweek, 2, sd)
#Calculate sd1i
ptsdyear_vghrsweek_n1i <- colSums(!is.na(ptsdyear_yes_ds2_vghrsweek))
#Calculate n1i
ptsdyear_no_ds2_vghrsweek <- subset(ptsdyear_no_ds2, select =
c(vghrsweek)) #Subset 2i data
ptsdyear_vghrsweek_m2i <- apply(ptsdyear_no_ds2_vghrsweek, 2, mean)
#Calculate m2i
ptsdyear_vghrsweek_sd2i <- apply(ptsdyear_no_ds2_vghrsweek, 2, sd)
#Calculate sd2i
ptsdyear_vghrsweek_n2i <- colSums(!is.na(ptsdyear_no_ds2_vghrsweek))
#Calculate n2i
ds2ptsdyear_meta <- data.frame(m1i = ptsdyear_vghrsweek_m1i, sd1i =
ptsdyear_vghrsweek_sd1i, n1i = ptsdyear_vghrsweek_n1i, m2i =
ptsdyear_vghrsweek_m2i, sd2i = ptsdyear_vghrsweek_sd2i, n2i =
ptsdyear_vghrsweek_n2i) #MA dataframe
ds2ptsdyear_meta <- escalc(measure="MD", m1i = m1i, sd1i = sd1i, n1i =
n1i, m2i = m2i, sd2i = sd2i, n2i = n2i, data=ds2ptsdyear_meta) #Calculate
yi and vi

```

### #FE meta-analysis

```

(ptsdyear_meta <- rbind(ds1ptsdyear_meta, ds2ptsdyear_meta))

```

```

##      m1i  sd1i n1i   m2i  sd2i n2i   yi   vi
## 1 12.84000 13.26348  75 16.46753 17.04451  77 -3.6275  6.1185
## 2 22.54667 26.61876 150 22.70130 23.92261  77 -0.1546 12.1561

```

```

(ptsdyear_vghrsweek_meta <- rma(yi=yi, vi=vi, measure="MD",
method="FE", data=ptsdyear_meta))

```

```

##
## Fixed-Effects Model (k = 2)
##
## Test for Heterogeneity:
## Q(df = 1) = 0.6600, p-val = 0.4166
##
## Model Results:
##
## estimate      se      zval      pval      ci.lb      ci.ub
## -2.4648      2.0174     -1.2217     0.2218     -6.4188     1.4893
##
## ---
## Signif. codes:  0 '***' 0.001 '**' 0.01 '*' 0.05 '.' 0.1 ' ' 1

```

## Days per week

### #Study 1

```

ptsdyear_yes_ds1_vgdaysweek <- subset(ptsdyear_yes_ds1, select =
c(vgdaysweek)) #Subset 1i data
ptsdyear_vgdaysweek_m1i <- apply(ptsdyear_yes_ds1_vgdaysweek, 2,
mean) #Calculate m1i
ptsdyear_vgdaysweek_sd1i <- apply(ptsdyear_yes_ds1_vgdaysweek, 2, sd)
#Calculate sd1i
ptsdyear_vgdaysweek_n1i <- colSums(!is.na(ptsdyear_yes_ds1_vgdaysweek))
#Calculate n1i
ptsdyear_no_ds1_vgdaysweek <- subset(ptsdyear_no_ds1, select =
c(vgdaysweek)) #Subset 2i data
ptsdyear_vgdaysweek_m2i <- apply(ptsdyear_no_ds1_vgdaysweek, 2, mean)
#Calculate m2i
ptsdyear_vgdaysweek_sd2i <- apply(ptsdyear_no_ds1_vgdaysweek, 2, sd)
#Calculate sd2i
ptsdyear_vgdaysweek_n2i <- colSums(!is.na(ptsdyear_no_ds1_vgdaysweek))
#Calculate n2i
ds1ptsdyear_meta <- data.frame(m1i = ptsdyear_vgdaysweek_m1i, sd1i =
ptsdyear_vgdaysweek_sd1i, n1i = ptsdyear_vgdaysweek_n1i, m2i =
ptsdyear_vgdaysweek_m2i, sd2i = ptsdyear_vgdaysweek_sd2i, n2i =
ptsdyear_vgdaysweek_n2i) #MA dataframe
ds1ptsdyear_meta <- escalc(measure="MD", m1i = m1i, sd1i = sd1i, n1i =
n1i, m2i = m2i, sd2i = sd2i, n2i = n2i, data=ds1ptsdyear_meta) #Calculate
yi and vi

```

### #Study 2

```

ptsdyear_yes_ds2_vgdaysweek <- subset(ptsdyear_yes_ds2, select =
c(vgdaysweek)) #Subset 1i data
ptsdyear_vgdaysweek_m1i <- apply(ptsdyear_yes_ds2_vgdaysweek, 2,
mean) #Calculate m1i
ptsdyear_vgdaysweek_sd1i <- apply(ptsdyear_yes_ds2_vgdaysweek, 2, sd)
#Calculate sd1i
ptsdyear_vgdaysweek_n1i <- colSums(!is.na(ptsdyear_yes_ds2_vgdaysweek))

```

```

#Calculate n1i
ptsdyear_no_ds2_vgdaysweek <- subset(ptsdyear_no_ds2, select =
c(vgdaysweek)) #Subset 2i data
ptsdyear_vgdaysweek_m2i <- apply(ptsdyear_no_ds2_vgdaysweek, 2, mean)
#Calculate m2i
ptsdyear_vgdaysweek_sd2i <- apply(ptsdyear_no_ds2_vgdaysweek, 2, sd)
#Calculate sd2i
ptsdyear_vgdaysweek_n2i <- colSums(!is.na(ptsdyear_no_ds2_vgdaysweek))
#Calculate n2i
ds2ptsdyear_meta <- data.frame(m1i = ptsdyear_vgdaysweek_m1i, sd1i =
ptsdyear_vgdaysweek_sd1i, n1i = ptsdyear_vgdaysweek_n1i, m2i =
ptsdyear_vgdaysweek_m2i, sd2i = ptsdyear_vgdaysweek_sd2i, n2i =
ptsdyear_vgdaysweek_n2i) #MA dataframe
ds2ptsdyear_meta <- escalc(measure="MD", m1i = m1i, sd1i = sd1i, n1i =
n1i, m2i = m2i, sd2i = sd2i, n2i = n2i, data=ds2ptsdyear_meta) #Calculate
yi and vi

#FE meta-analysis
(ptsdyear_meta <- rbind(ds1ptsdyear_meta, ds2ptsdyear_meta))

##      m1i  sd1i n1i   m2i  sd2i n2i   yi   vi
## 1 5.226667 2.215262 75 5.090909 2.340613 77 0.1358 0.1366
## 2 5.006667 2.087022 150 5.051948 2.276286 77 -0.0453 0.0963

(ptsdyear_vgdaysweek_meta <- rma(yi=yi, vi=vi, measure="MD",
method="FE", data=ptsdyear_meta))

##
## Fixed-Effects Model (k = 2)
##
## Test for Heterogeneity:
## Q(df = 1) = 0.1407, p-val = 0.7076
##
## Model Results:
##
## estimate    se    zval    pval  ci.lb  ci.ub
## 0.0296 0.2377 0.1245 0.9009 -0.4362 0.4954
##
## ---
## Signif. codes: 0 '***' 0.001 '**' 0.01 '*' 0.05 '.' 0.1 ' ' 1

```

## PTSD care - month

### Replicated Effect

#### Hours per day

##### Study 1

```
(vghrsday_ptsdmonth_ds1 <- t.test(vghrsday ~ mhmonth, data=ds1ptsd))
```

```
##  
## Welch Two Sample t-test  
##  
## data: vghrsday by mhmonth  
## t = -1.2971, df = 38.121, p-value = 0.2024  
## alternative hypothesis: true difference in means is not equal to 0  
## 95 percent confidence interval:  
## -1.4749509 0.3228772  
## sample estimates:  
## mean in group 0 mean in group 1  
## 2.459677 3.035714
```

##### Study 2

```
(vghrsday_ptsdmonth_ds2 <- t.test(vghrsday ~ mhmonth, data=ds2ptsd))
```

```
##  
## Welch Two Sample t-test  
##  
## data: vghrsday by mhmonth  
## t = 0.95147, df = 175.14, p-value = 0.3427  
## alternative hypothesis: true difference in means is not equal to 0  
## 95 percent confidence interval:  
## -0.4883524 1.3975426  
## sample estimates:  
## mean in group 0 mean in group 1  
## 4.197452 3.742857
```

#### Hours per week

##### Study 1

```
(vghrsweek_ptsdmonth_ds1 <- t.test(vghrsweek ~ mhmonth, data=ds1ptsd))
```

```
##  
## Welch Two Sample t-test  
##  
## data: vghrsweek by mhmonth  
## t = -1.0484, df = 38.484, p-value = 0.301
```

```
## alternative hypothesis: true difference in means is not equal to 0
## 95 percent confidence interval:
## -10.265701  3.258788
## sample estimates:
## mean in group 0 mean in group 1
##      14.03226      17.53571
```

## Study 2

```
(vghrsweek_ptsdmonth_ds2 <- t.test(vghrsweek ~ mhmonth, data=ds2ptsd))
```

```
##
## Welch Two Sample t-test
##
## data: vghrsweek by mhmonth
## t = 1.6154, df = 174.39, p-value = 0.108
## alternative hypothesis: true difference in means is not equal to 0
## 95 percent confidence interval:
## -1.18153 11.83704
## sample estimates:
## mean in group 0 mean in group 1
##      24.24204      18.91429
```

## Days per week

### Study 1

```
(vgdaysweek_ptsdmonth_ds1 <- t.test(vgdaysweek ~ mhmonth,
data=ds1ptsd))
```

```
##
## Welch Two Sample t-test
##
## data: vgdaysweek by mhmonth
## t = -0.8042, df = 41.002, p-value = 0.4259
## alternative hypothesis: true difference in means is not equal to 0
## 95 percent confidence interval:
## -1.3187332  0.5675812
## sample estimates:
## mean in group 0 mean in group 1
##      5.088710      5.464286
```

### Study 2

```
(vgdaysweek_ptsdmonth_ds2 <- t.test(vgdaysweek ~ mhmonth,
data=ds2ptsd))
```

```
##
## Welch Two Sample t-test
##
## data: vgdaysweek by mhmonth
## t = 1.1234, df = 137.24, p-value = 0.2632
## alternative hypothesis: true difference in means is not equal to 0
## 95 percent confidence interval:
## -0.2597604 0.9431089
## sample estimates:
## mean in group 0 mean in group 1
##      5.127389      4.785714
```

## MD

### Hours per day

```
#Study 1
ptsdmonth_yes_ds1_vghrsday <- subset(ptsdmonth_yes_ds1, select =
c(vghrsday)) #Subset 1i data
ptsdmonth_vghrsday_m1i <- apply(ptsdmonth_yes_ds1_vghrsday, 2, mean)
#Calculate m1i
ptsdmonth_vghrsday_sd1i <- apply(ptsdmonth_yes_ds1_vghrsday, 2, sd)
#Calculate sd1i
ptsdmonth_vghrsday_n1i <- colSums(!is.na(ptsdmonth_yes_ds1_vghrsday))
#Calculate n1i
ptsdmonth_no_ds1_vghrsday <- subset(ptsdmonth_no_ds1, select =
c(vghrsday)) #Subset 2i data
ptsdmonth_vghrsday_m2i <- apply(ptsdmonth_no_ds1_vghrsday, 2, mean)
#Calculate m2i
ptsdmonth_vghrsday_sd2i <- apply(ptsdmonth_no_ds1_vghrsday, 2, sd)
#Calculate sd2i
ptsdmonth_vghrsday_n2i <- colSums(!is.na(ptsdmonth_no_ds1_vghrsday))
#Calculate n2i
ds1ptsdmonth_meta <- data.frame(m1i = ptsdmonth_vghrsday_m1i, sd1i =
ptsdmonth_vghrsday_sd1i, n1i = ptsdmonth_vghrsday_n1i, m2i =
ptsdmonth_vghrsday_m2i, sd2i = ptsdmonth_vghrsday_sd2i, n2i =
ptsdmonth_vghrsday_n2i) #MA dataframe
ds1ptsdmonth_meta <- escalc(measure="MD", m1i = m1i, sd1i = sd1i, n1i =
n1i, m2i = m2i, sd2i = sd2i, n2i = n2i, data=ds1ptsdmonth_meta) #Calculate
yi and vi

#Study 2
ptsdmonth_yes_ds2_vghrsday <- subset(ptsdmonth_yes_ds2, select =
c(vghrsday)) #Subset 1i data
ptsdmonth_vghrsday_m1i <- apply(ptsdmonth_yes_ds2_vghrsday, 2, mean)
#Calculate m1i
ptsdmonth_vghrsday_sd1i <- apply(ptsdmonth_yes_ds2_vghrsday, 2, sd)
#Calculate sd1i
ptsdmonth_vghrsday_n1i <- colSums(!is.na(ptsdmonth_yes_ds2_vghrsday))
```

```

#Calculate n1i
ptsdmonth_no_ds2_vghrsday <- subset(ptsdmonth_no_ds2, select =
c(vghrsday)) #Subset 2i data
ptsdmonth_vghrsday_m2i <- apply(ptsdmonth_no_ds2_vghrsday, 2, mean)
#Calculate m2i
ptsdmonth_vghrsday_sd2i <- apply(ptsdmonth_no_ds2_vghrsday, 2, sd)
#Calculate sd2i
ptsdmonth_vghrsday_n2i <- colSums(!is.na(ptsdmonth_no_ds2_vghrsday))
#Calculate n2i
ds2ptsdmonth_meta <- data.frame(m1i = ptsdmonth_vghrsday_m1i, sd1i =
ptsdmonth_vghrsday_sd1i, n1i = ptsdmonth_vghrsday_n1i, m2i =
ptsdmonth_vghrsday_m2i, sd2i = ptsdmonth_vghrsday_sd2i, n2i =
ptsdmonth_vghrsday_n2i) #MA dataframe
ds2ptsdmonth_meta <- escalc(measure="MD", m1i = m1i, sd1i = sd1i, n1i =
n1i, m2i = m2i, sd2i = sd2i, n2i = n2i, data=ds2ptsdmonth_meta) #Calculate
yi and vi

```

### #FE meta-analysis

```
(ptsdmonth_meta <- rbind(ds1ptsdmonth_meta, ds2ptsdmonth_meta))
```

```

##      m1i  sd1i n1i  m2i  sd2i n2i  yi  vi
## 1 3.035714 2.151350 28 2.459677 1.989400 124 0.5760 0.1972
## 2 3.742857 2.971779 70 4.197452 4.003908 157 -0.4546 0.2283

```

```
(ptsdmonth_vghrsday_meta <- rma(yi=yi, vi=vi, measure="MD",
method="FE", data=ptsdmonth_meta))
```

```

##
## Fixed-Effects Model (k = 2)
##
## Test for Heterogeneity:
## Q(df = 1) = 2.4964, p-val = 0.1141
##
## Model Results:
##
## estimate    se    zval    pval  ci.lb  ci.ub
## 0.0983  0.3253  0.3023  0.7624 -0.5392  0.7359
##
## ---
## Signif. codes:  0 '***' 0.001 '**' 0.01 '*' 0.05 '.' 0.1 ' ' 1

```

## Hours per week

### #Study 1

```

ptsdmonth_yes_ds1_vghrsweek <- subset(ptsdmonth_yes_ds1, select =
c(vghrsweek)) #Subset 1i data
ptsdmonth_vghrsweek_m1i <- apply(ptsdmonth_yes_ds1_vghrsweek, 2,
mean) #Calculate m1i
ptsdmonth_vghrsweek_sd1i <- apply(ptsdmonth_yes_ds1_vghrsweek, 2, sd)
#Calculate sd1i

```



```

ptsdmonth_vghrsweek_n1i <- colSums(!
is.na(ptsdmonth_yes_ds1_vghrsweek)) #Calculate n1i
ptsdmonth_no_ds1_vghrsweek <- subset(ptsdmonth_no_ds1, select =
c(vghrsweek)) #Subset 2i data
ptsdmonth_vghrsweek_m2i <- apply(ptsdmonth_no_ds1_vghrsweek, 2, mean)
#Calculate m2i
ptsdmonth_vghrsweek_sd2i <- apply(ptsdmonth_no_ds1_vghrsweek, 2, sd)
#Calculate sd2i
ptsdmonth_vghrsweek_n2i <- colSums(!is.na(ptsdmonth_no_ds1_vghrsweek))
#Calculate n2i
ds1ptsdmonth_meta <- data.frame(m1i = ptsdmonth_vghrsweek_m1i, sd1i =
ptsdmonth_vghrsweek_sd1i, n1i = ptsdmonth_vghrsweek_n1i, m2i =
ptsdmonth_vghrsweek_m2i, sd2i = ptsdmonth_vghrsweek_sd2i, n2i =
ptsdmonth_vghrsweek_n2i) #MA dataframe
ds1ptsdmonth_meta <- escalc(measure="MD", m1i = m1i, sd1i = sd1i, n1i =
n1i, m2i = m2i, sd2i = sd2i, n2i = n2i, data=ds1ptsdmonth_meta) #Calculate
yi and vi

```

### #Study 2

```

ptsdmonth_yes_ds2_vghrsweek <- subset(ptsdmonth_yes_ds2, select =
c(vghrsweek)) #Subset 1i data
ptsdmonth_vghrsweek_m1i <- apply(ptsdmonth_yes_ds2_vghrsweek, 2,
mean) #Calculate m1i
ptsdmonth_vghrsweek_sd1i <- apply(ptsdmonth_yes_ds2_vghrsweek, 2, sd)
#Calculate sd1i
ptsdmonth_vghrsweek_n1i <- colSums(!
is.na(ptsdmonth_yes_ds2_vghrsweek)) #Calculate n1i
ptsdmonth_no_ds2_vghrsweek <- subset(ptsdmonth_no_ds2, select =
c(vghrsweek)) #Subset 2i data
ptsdmonth_vghrsweek_m2i <- apply(ptsdmonth_no_ds2_vghrsweek, 2, mean)
#Calculate m2i
ptsdmonth_vghrsweek_sd2i <- apply(ptsdmonth_no_ds2_vghrsweek, 2, sd)
#Calculate sd2i
ptsdmonth_vghrsweek_n2i <- colSums(!is.na(ptsdmonth_no_ds2_vghrsweek))
#Calculate n2i
ds2ptsdmonth_meta <- data.frame(m1i = ptsdmonth_vghrsweek_m1i, sd1i =
ptsdmonth_vghrsweek_sd1i, n1i = ptsdmonth_vghrsweek_n1i, m2i =
ptsdmonth_vghrsweek_m2i, sd2i = ptsdmonth_vghrsweek_sd2i, n2i =
ptsdmonth_vghrsweek_n2i) #MA dataframe
ds2ptsdmonth_meta <- escalc(measure="MD", m1i = m1i, sd1i = sd1i, n1i =
n1i, m2i = m2i, sd2i = sd2i, n2i = n2i, data=ds2ptsdmonth_meta) #Calculate
yi and vi

```

### #FE meta-analysis

```

(ptsdmonth_meta <- rbind(ds1ptsdmonth_meta, ds2ptsdmonth_meta))

```

```

##      m1i  sd1i n1i   m2i  sd2i n2i   yi   vi
## 1 17.53571 16.14857 28 14.03226 15.16196 124 3.5035 11.1674
## 2 18.91429 20.55797 70 24.24204 27.56517 157 -5.3278 10.8773

```

```
(ptsdmonth_vghrsweek_meta <- rma(yi=yi, vi=vi, measure="MD",
method="FE", data=ptsdmonth_meta))
```

```
##
## Fixed-Effects Model (k = 2)
##
## Test for Heterogeneity:
## Q(df = 1) = 3.5378, p-val = 0.0600
##
## Model Results:
##
## estimate      se      zval      pval      ci.lb      ci.ub
## -0.9702      2.3474     -0.4133     0.6794     -5.5710     3.6305
##
## ---
## Signif. codes:  0 '***' 0.001 '**' 0.01 '*' 0.05 '.' 0.1 ' ' 1
```

## Days per week

### *#Study 1*

```
ptsdmonth_yes_ds1_vgdaysweek <- subset(ptsdmonth_yes_ds1, select =
c(vgdaysweek)) #Subset 1i data
ptsdmonth_vgdaysweek_m1i <- apply(ptsdmonth_yes_ds1_vgdaysweek, 2,
mean) #Calculate m1i
ptsdmonth_vgdaysweek_sd1i <- apply(ptsdmonth_yes_ds1_vgdaysweek, 2,
sd) #Calculate sd1i
ptsdmonth_vgdaysweek_n1i <- colSums(!
is.na(ptsdmonth_yes_ds1_vgdaysweek)) #Calculate n1i
ptsdmonth_no_ds1_vgdaysweek <- subset(ptsdmonth_no_ds1, select =
c(vgdaysweek)) #Subset 2i data
ptsdmonth_vgdaysweek_m2i <- apply(ptsdmonth_no_ds1_vgdaysweek, 2,
mean) #Calculate m2i
ptsdmonth_vgdaysweek_sd2i <- apply(ptsdmonth_no_ds1_vgdaysweek, 2,
sd) #Calculate sd2i
ptsdmonth_vgdaysweek_n2i <- colSums(!
is.na(ptsdmonth_no_ds1_vgdaysweek)) #Calculate n2i
ds1ptsdmonth_meta <- data.frame(m1i = ptsdmonth_vgdaysweek_m1i, sd1i
= ptsdmonth_vgdaysweek_sd1i, n1i = ptsdmonth_vgdaysweek_n1i, m2i =
ptsdmonth_vgdaysweek_m2i, sd2i = ptsdmonth_vgdaysweek_sd2i, n2i =
ptsdmonth_vgdaysweek_n2i) #MA dataframe
ds1ptsdmonth_meta <- escalc(measure="MD", m1i = m1i, sd1i = sd1i, n1i =
n1i, m2i = m2i, sd2i = sd2i, n2i = n2i, data=ds1ptsdmonth_meta) #Calculate
yi and vi
```

### *#Study 2*

```
ptsdmonth_yes_ds2_vgdaysweek <- subset(ptsdmonth_yes_ds2, select =
c(vgdaysweek)) #Subset 1i data
ptsdmonth_vgdaysweek_m1i <- apply(ptsdmonth_yes_ds2_vgdaysweek, 2,
mean) #Calculate m1i
```

```

ptsdmonth_vgdaysweek_sd1i <- apply(ptsdmonth_yes_ds2_vgdaysweek, 2,
sd) #Calculate sd1i
ptsdmonth_vgdaysweek_n1i <- colSums(!
is.na(ptsdmonth_yes_ds2_vgdaysweek)) #Calculate n1i
ptsdmonth_no_ds2_vgdaysweek <- subset(ptsdmonth_no_ds2, select =
c(vgdaysweek)) #Subset 2i data
ptsdmonth_vgdaysweek_m2i <- apply(ptsdmonth_no_ds2_vgdaysweek, 2,
mean) #Calculate m2i
ptsdmonth_vgdaysweek_sd2i <- apply(ptsdmonth_no_ds2_vgdaysweek, 2,
sd) #Calculate sd2i
ptsdmonth_vgdaysweek_n2i <- colSums(!
is.na(ptsdmonth_no_ds2_vgdaysweek)) #Calculate n2i
ds2ptsdmonth_meta <- data.frame(m1i = ptsdmonth_vgdaysweek_m1i, sd1i =
ptsdmonth_vgdaysweek_sd1i, n1i = ptsdmonth_vgdaysweek_n1i, m2i =
ptsdmonth_vgdaysweek_m2i, sd2i = ptsdmonth_vgdaysweek_sd2i, n2i =
ptsdmonth_vgdaysweek_n2i) #MA dataframe
ds2ptsdmonth_meta <- escalc(measure="MD", m1i = m1i, sd1i = sd1i, n1i =
n1i, m2i = m2i, sd2i = sd2i, n2i = n2i, data=ds2ptsdmonth_meta) #Calculate
yi and vi

#FE meta-analysis
(ptsdmonth_meta <- rbind(ds1ptsdmonth_meta, ds2ptsdmonth_meta))

##      m1i  sd1i n1i  m2i  sd2i n2i  yi  vi
## 1 5.464286 2.219145 28 5.088710 2.288224 124 0.3756 0.2181
## 2 4.785714 2.091341 70 5.127389 2.171276 157 -0.3417 0.0925

(ptsdmonth_vgdaysweek_meta <- rma(yi=yi, vi=vi, measure="MD",
method="FE", data=ptsdmonth_meta))

##
## Fixed-Effects Model (k = 2)
##
## Test for Heterogeneity:
## Q(df = 1) = 1.6562, p-val = 0.1981
##
## Model Results:
##
## estimate    se    zval    pval  ci.lb  ci.ub
## -0.1281  0.2549 -0.5024  0.6154 -0.6276  0.3715
##
## ---
## Signif. codes:  0 '***' 0.001 '**' 0.01 '*' 0.05 '.' 0.1 ' ' 1

```

## Depression care - discharge

### Replicated Effect

#### Hours per day

##### Study 1

```
(vghrsday_depressiondis_ds1 <- t.test(vghrsday ~ mhdis,  
data=ds1depression))
```

```
##  
## Welch Two Sample t-test  
##  
## data: vghrsday by mhdis  
## t = 0.68063, df = 84.106, p-value = 0.498  
## alternative hypothesis: true difference in means is not equal to 0  
## 95 percent confidence interval:  
## -0.4493641 0.9170512  
## sample estimates:  
## mean in group 0 mean in group 1  
## 2.775510 2.541667
```

##### Study 2

```
(vghrsday_depressiondis_ds2 <- t.test(vghrsday ~ mhdis,  
data=ds2depression))
```

```
##  
## Welch Two Sample t-test  
##  
## data: vghrsday by mhdis  
## t = -2.3638, df = 179.93, p-value = 0.01916  
## alternative hypothesis: true difference in means is not equal to 0  
## 95 percent confidence interval:  
## -1.6678833 -0.1501875  
## sample estimates:  
## mean in group 0 mean in group 1  
## 3.206349 4.115385
```

#### Hours per week

##### Study 1

```
(vghrsweek_depressiondis_ds1 <- t.test(vghrsweek ~ mhdis,  
data=ds1depression))
```

```
##  
## Welch Two Sample t-test
```

```
##
## data: vghrsweek by mhdis
## t = 0.70153, df = 82.026, p-value = 0.485
## alternative hypothesis: true difference in means is not equal to 0
## 95 percent confidence interval:
## -3.378858 7.060150
## sample estimates:
## mean in group 0 mean in group 1
##      16.44898      14.60833
```

## Study 2

```
(vghrsweek_depressiondis_ds2 <- t.test(vghrsweek ~ mhdis,
data=ds2depression))
```

```
##
## Welch Two Sample t-test
##
## data: vghrsweek by mhdis
## t = -2.3401, df = 185.02, p-value = 0.02034
## alternative hypothesis: true difference in means is not equal to 0
## 95 percent confidence interval:
## -11.3229771 -0.9641109
## sample estimates:
## mean in group 0 mean in group 1
##      16.42857      22.57212
```

## Days per week

### Study 1

```
(vgdaysweek_depressiondis_ds1 <- t.test(vgdaysweek ~ mhdis,
data=ds1depression))
```

```
##
## Welch Two Sample t-test
##
## data: vgdaysweek by mhdis
## t = -0.3834, df = 88.029, p-value = 0.7024
## alternative hypothesis: true difference in means is not equal to 0
## 95 percent confidence interval:
## -0.9022650 0.6104283
## sample estimates:
## mean in group 0 mean in group 1
##      5.204082      5.350000
```

## Study 2

```
(vgdaysweek_depressiondis_ds2 <- t.test(vgdaysweek ~ mhdis,  
data=ds2depression))
```

```
##  
## Welch Two Sample t-test  
##  
## data: vgdaysweek by mhdis  
## t = -0.81695, df = 95.151, p-value = 0.416  
## alternative hypothesis: true difference in means is not equal to 0  
## 95 percent confidence interval:  
## -0.9239930 0.3852262  
## sample estimates:  
## mean in group 0 mean in group 1  
## 4.682540 4.951923
```

## MD

### Hours per day

#### *#Study 1*

```
depressiondis_yes_ds1_vghrsday <- subset(depressiondis_yes_ds1, select =  
c(vghrsday)) #Subset 1i data  
depressiondis_vghrsday_m1i <- apply(depressiondis_yes_ds1_vghrsday, 2,  
mean) #Calculate m1i  
depressiondis_vghrsday_sd1i <- apply(depressiondis_yes_ds1_vghrsday, 2,  
sd) #Calculate sd1i  
depressiondis_vghrsday_n1i <- colSums(!  
is.na(depressiondis_yes_ds1_vghrsday)) #Calculate n1i  
depressiondis_no_ds1_vghrsday <- subset(depressiondis_no_ds1, select =  
c(vghrsday)) #Subset 2i data  
depressiondis_vghrsday_m2i <- apply(depressiondis_no_ds1_vghrsday, 2,  
mean) #Calculate m2i  
depressiondis_vghrsday_sd2i <- apply(depressiondis_no_ds1_vghrsday, 2, sd)  
#Calculate sd2i  
depressiondis_vghrsday_n2i <- colSums(!  
is.na(depressiondis_no_ds1_vghrsday)) #Calculate n2i  
ds1depressiondis_meta <- data.frame(m1i = depressiondis_vghrsday_m1i,  
sd1i = depressiondis_vghrsday_sd1i, n1i = depressiondis_vghrsday_n1i, m2i  
= depressiondis_vghrsday_m2i, sd2i = depressiondis_vghrsday_sd2i, n2i =  
depressiondis_vghrsday_n2i) #MA dataframe  
ds1depressiondis_meta <- escalc(measure="MD", m1i = m1i, sd1i = sd1i, n1i  
= n1i, m2i = m2i, sd2i = sd2i, n2i = n2i, data=ds1depressiondis_meta)  
#Calculate yi and vi
```

#### *#Study 2*

```
depressiondis_yes_ds2_vghrsday <- subset(depressiondis_yes_ds2, select =  
c(vghrsday)) #Subset 1i data  
depressiondis_vghrsday_m1i <- apply(depressiondis_yes_ds2_vghrsday, 2,
```

```

mean) #Calculate m1i
depressiondis_vghrsday_sd1i <- apply(depressiondis_yes_ds2_vghrsday, 2,
sd) #Calculate sd1i
depressiondis_vghrsday_n1i <- colSums(!
is.na(depressiondis_yes_ds2_vghrsday)) #Calculate n1i
depressiondis_no_ds2_vghrsday <- subset(depressiondis_no_ds2, select =
c(vghrsday)) #Subset 2i data
depressiondis_vghrsday_m2i <- apply(depressiondis_no_ds2_vghrsday, 2,
mean) #Calculate m2i
depressiondis_vghrsday_sd2i <- apply(depressiondis_no_ds2_vghrsday, 2, sd)
#Calculate sd2i
depressiondis_vghrsday_n2i <- colSums(!
is.na(depressiondis_no_ds2_vghrsday)) #Calculate n2i
ds2depressiondis_meta <- data.frame(m1i = depressiondis_vghrsday_m1i,
sd1i = depressiondis_vghrsday_sd1i, n1i = depressiondis_vghrsday_n1i, m2i
= depressiondis_vghrsday_m2i, sd2i = depressiondis_vghrsday_sd2i, n2i =
depressiondis_vghrsday_n2i) #MA dataframe
ds2depressiondis_meta <- escalc(measure="MD", m1i = m1i, sd1i = sd1i, n1i
= n1i, m2i = m2i, sd2i = sd2i, n2i = n2i, data=ds2depressiondis_meta)
#Calculate yi and vi

#FE meta-analysis
(depressiondis_meta <- rbind(ds1depressiondis_meta,
ds2depressiondis_meta))

##      m1i sd1i n1i  m2i  sd2i n2i  yi  vi
## 1 2.541667 1.93115 120 2.775510 2.064232 49 -0.2338 0.1180
## 2 4.115385 3.81532 208 3.206349 2.215479 63 0.9090 0.1479

(depressiondis_vghrsday_meta <- rma(yi=yi, vi=vi, measure="MD",
method="FE", data=depressiondis_meta))

##
## Fixed-Effects Model (k = 2)
##
## Test for Heterogeneity:
## Q(df = 1) = 4.9117, p-val = 0.0267
##
## Model Results:
##
## estimate se zval pval ci.lb ci.ub
## 0.2734 0.2562 1.0672 0.2859 -0.2287 0.7756
##
## ---
## Signif. codes: 0 '***' 0.001 '**' 0.01 '*' 0.05 '.' 0.1 ' ' 1

```

## Hours per week

### #Study 1

```
depressiondis_yes_ds1_vghrsweek <- subset(depressiondis_yes_ds1, select =
```

```

c(vghrsweek)) #Subset 1i data
depressiondis_vghrsweek_m1i <- apply(depressiondis_yes_ds1_vghrsweek, 2,
mean) #Calculate m1i
depressiondis_vghrsweek_sd1i <- apply(depressiondis_yes_ds1_vghrsweek,
2, sd) #Calculate sd1i
depressiondis_vghrsweek_n1i <- colSums(!
is.na(depressiondis_yes_ds1_vghrsweek)) #Calculate n1i
depressiondis_no_ds1_vghrsweek <- subset(depressiondis_no_ds1, select =
c(vghrsweek)) #Subset 2i data
depressiondis_vghrsweek_m2i <- apply(depressiondis_no_ds1_vghrsweek, 2,
mean) #Calculate m2i
depressiondis_vghrsweek_sd2i <- apply(depressiondis_no_ds1_vghrsweek, 2,
sd) #Calculate sd2i
depressiondis_vghrsweek_n2i <- colSums(!
is.na(depressiondis_no_ds1_vghrsweek)) #Calculate n2i
ds1depressiondis_meta <- data.frame(m1i = depressiondis_vghrsweek_m1i,
sd1i = depressiondis_vghrsweek_sd1i, n1i = depressiondis_vghrsweek_n1i,
m2i = depressiondis_vghrsweek_m2i, sd2i = depressiondis_vghrsweek_sd2i,
n2i = depressiondis_vghrsweek_n2i) #MA dataframe
ds1depressiondis_meta <- escalc(measure="MD", m1i = m1i, sd1i = sd1i, n1i
= n1i, m2i = m2i, sd2i = sd2i, n2i = n2i, data=ds1depressiondis_meta)
#Calculate yi and vi

```

#### #Study 2

```

depressiondis_yes_ds2_vghrsweek <- subset(depressiondis_yes_ds2, select =
c(vghrsweek)) #Subset 1i data
depressiondis_vghrsweek_m1i <- apply(depressiondis_yes_ds2_vghrsweek, 2,
mean) #Calculate m1i
depressiondis_vghrsweek_sd1i <- apply(depressiondis_yes_ds2_vghrsweek,
2, sd) #Calculate sd1i
depressiondis_vghrsweek_n1i <- colSums(!
is.na(depressiondis_yes_ds2_vghrsweek)) #Calculate n1i
depressiondis_no_ds2_vghrsweek <- subset(depressiondis_no_ds2, select =
c(vghrsweek)) #Subset 2i data
depressiondis_vghrsweek_m2i <- apply(depressiondis_no_ds2_vghrsweek, 2,
mean) #Calculate m2i
depressiondis_vghrsweek_sd2i <- apply(depressiondis_no_ds2_vghrsweek, 2,
sd) #Calculate sd2i
depressiondis_vghrsweek_n2i <- colSums(!
is.na(depressiondis_no_ds2_vghrsweek)) #Calculate n2i
ds2depressiondis_meta <- data.frame(m1i = depressiondis_vghrsweek_m1i,
sd1i = depressiondis_vghrsweek_sd1i, n1i = depressiondis_vghrsweek_n1i,
m2i = depressiondis_vghrsweek_m2i, sd2i = depressiondis_vghrsweek_sd2i,
n2i = depressiondis_vghrsweek_n2i) #MA dataframe
ds2depressiondis_meta <- escalc(measure="MD", m1i = m1i, sd1i = sd1i, n1i
= n1i, m2i = m2i, sd2i = sd2i, n2i = n2i, data=ds2depressiondis_meta)
#Calculate yi and vi

```

#### #FE meta-analysis



```

(depressiondis_meta <- rbind(ds1depressiondis_meta,
ds2depressiondis_meta))

##      m1i  sd1i n1i  m2i  sd2i n2i  yi  vi
## 1 14.60833 14.42704 120 16.44898 15.88508 49 -1.8406 6.8842
## 2 22.57212 26.38995 208 16.42857 14.94259 63 6.1435 6.8924

(depressiondis_vghrsweek_meta <- rma(yi=yi, vi=vi, measure="MD",
method="FE", data=depressiondis_meta))

##
## Fixed-Effects Model (k = 2)
##
## Test for Heterogeneity:
## Q(df = 1) = 4.6272, p-val = 0.0315
##
## Model Results:
##
## estimate      se      zval      pval      ci.lb      ci.ub
## 2.1491  1.8558  1.1580  0.2469 -1.4883  5.7865
##
## ---
## Signif. codes:  0 '***' 0.001 '**' 0.01 '*' 0.05 '.' 0.1 ' ' 1

```

## Days per week

```

#Study 1
depressiondis_yes_ds1_vgdaysweek <- subset(depressiondis_yes_ds1, select
= c(vgdaysweek)) #Subset 1i data
depressiondis_vgdaysweek_m1i <-
apply(depressiondis_yes_ds1_vgdaysweek, 2, mean) #Calculate m1i
depressiondis_vgdaysweek_sd1i <-
apply(depressiondis_yes_ds1_vgdaysweek, 2, sd) #Calculate sd1i
depressiondis_vgdaysweek_n1i <- colSums(!
is.na(depressiondis_yes_ds1_vgdaysweek)) #Calculate n1i
depressiondis_no_ds1_vgdaysweek <- subset(depressiondis_no_ds1, select =
c(vgdaysweek)) #Subset 2i data
depressiondis_vgdaysweek_m2i <- apply(depressiondis_no_ds1_vgdaysweek,
2, mean) #Calculate m2i
depressiondis_vgdaysweek_sd2i <- apply(depressiondis_no_ds1_vgdaysweek,
2, sd) #Calculate sd2i
depressiondis_vgdaysweek_n2i <- colSums(!
is.na(depressiondis_no_ds1_vgdaysweek)) #Calculate n2i
ds1depressiondis_meta <- data.frame(m1i = depressiondis_vgdaysweek_m1i,
sd1i = depressiondis_vgdaysweek_sd1i, n1i =
depressiondis_vgdaysweek_n1i, m2i = depressiondis_vgdaysweek_m2i, sd2i
= depressiondis_vgdaysweek_sd2i, n2i = depressiondis_vgdaysweek_n2i)
#MA dataframe
ds1depressiondis_meta <- escalc(measure="MD", m1i = m1i, sd1i = sd1i, n1i
= n1i, m2i = m2i, sd2i = sd2i, n2i = n2i, data=ds1depressiondis_meta)

```

```
#Calculate yi and vi
```

```
#Study 2
```

```
depressiondis_yes_ds2_vgdaysweek <- subset(depressiondis_yes_ds2, select  
= c(vgdaysweek)) #Subset 1i data  
depressiondis_vgdaysweek_m1i <-  
apply(depressiondis_yes_ds2_vgdaysweek, 2, mean) #Calculate m1i  
depressiondis_vgdaysweek_sd1i <-  
apply(depressiondis_yes_ds2_vgdaysweek, 2, sd) #Calculate sd1i  
depressiondis_vgdaysweek_n1i <- colSums(!  
is.na(depressiondis_yes_ds2_vgdaysweek)) #Calculate n1i  
depressiondis_no_ds2_vgdaysweek <- subset(depressiondis_no_ds2, select =  
c(vgdaysweek)) #Subset 2i data  
depressiondis_vgdaysweek_m2i <- apply(depressiondis_no_ds2_vgdaysweek,  
2, mean) #Calculate m2i  
depressiondis_vgdaysweek_sd2i <- apply(depressiondis_no_ds2_vgdaysweek,  
2, sd) #Calculate sd2i  
depressiondis_vgdaysweek_n2i <- colSums(!  
is.na(depressiondis_no_ds2_vgdaysweek)) #Calculate n2i  
ds2depressiondis_meta <- data.frame(m1i = depressiondis_vgdaysweek_m1i,  
sd1i = depressiondis_vgdaysweek_sd1i, n1i =  
depressiondis_vgdaysweek_n1i, m2i = depressiondis_vgdaysweek_m2i, sd2i  
= depressiondis_vgdaysweek_sd2i, n2i = depressiondis_vgdaysweek_n2i)  
#MA dataframe  
ds2depressiondis_meta <- escalc(measure="MD", m1i = m1i, sd1i = sd1i, n1i  
= n1i, m2i = m2i, sd2i = sd2i, n2i = n2i, data=ds2depressiondis_meta)  
#Calculate yi and vi
```

```
#FE meta-analysis
```

```
(depressiondis_meta <- rbind(ds1depressiondis_meta,  
ds2depressiondis_meta))
```

```
##      m1i  sd1i n1i  m2i  sd2i n2i  yi  vi  
## 1 5.350000 2.221552 120 5.204082 2.254436 49 0.1459 0.1449  
## 2 4.951923 2.128163 208 4.682540 2.340564 63 0.2694 0.1087
```

```
(depressiondis_vgdaysweek_meta <- rma(yi=yi, vi=vi, measure="MD",  
method="FE", data=depressiondis_meta))
```

```
##
```

```
## Fixed-Effects Model (k = 2)
```

```
##
```

```
## Test for Heterogeneity:
```

```
## Q(df = 1) = 0.0601, p-val = 0.8063
```

```
##
```

```
## Model Results:
```

```
##
```

```
## estimate    se    zval    pval  ci.lb  ci.ub
```

```
## 0.2164 0.2492 0.8685 0.3851 -0.2720 0.7049
```

```
##
```

```
## ---  
## Signif. codes: 0 '***' 0.001 '**' 0.01 '*' 0.05 '.' 0.1 ' ' 1
```

## Depression care - year

### Replicated Effect

#### Hours per day

##### Study 1

```
(vghrsday_depressionyear_ds1 <- t.test(vghrsday ~ mhyear,  
data=ds1depression))
```

```
##  
## Welch Two Sample t-test  
##  
## data: vghrsday by mhyear  
## t = 1.37, df = 166.67, p-value = 0.1725  
## alternative hypothesis: true difference in means is not equal to 0  
## 95 percent confidence interval:  
## -0.1816303 1.0051432  
## sample estimates:  
## mean in group 0 mean in group 1  
## 2.806818 2.395062
```

##### Study 2

```
(vghrsday_depressionyear_ds2 <- t.test(vghrsday ~ mhyear,  
data=ds2depression))
```

```
##  
## Welch Two Sample t-test  
##  
## data: vghrsday by mhyear  
## t = -1.1833, df = 258.01, p-value = 0.2378  
## alternative hypothesis: true difference in means is not equal to 0  
## 95 percent confidence interval:  
## -1.313930 0.327538  
## sample estimates:  
## mean in group 0 mean in group 1  
## 3.603774 4.096970
```

## Hours per week

### Study 1

```
(vghrsweek_depressionyear_ds1 <- t.test(vghrsweek ~ mhyear,
data=ds1depression))

##
## Welch Two Sample t-test
##
## data: vghrsweek by mhyear
## t = 1.378, df = 165.58, p-value = 0.1701
## alternative hypothesis: true difference in means is not equal to 0
## 95 percent confidence interval:
## -1.34943 7.58512
## sample estimates:
## mean in group 0 mean in group 1
## 16.63636 13.51852
```

### Study 2

```
(vghrsweek_depressionyear_ds2 <- t.test(vghrsweek ~ mhyear,
data=ds2depression))

##
## Welch Two Sample t-test
##
## data: vghrsweek by mhyear
## t = -0.92386, df = 252.8, p-value = 0.3564
## alternative hypothesis: true difference in means is not equal to 0
## 95 percent confidence interval:
## -8.407068 3.038057
## sample estimates:
## mean in group 0 mean in group 1
## 19.50943 22.19394
```

## Days per week

### Study 1

```
(vgdaysweek_depressionyear_ds1 <- t.test(vgdaysweek ~ mhyear,
data=ds1depression))

##
## Welch Two Sample t-test
##
## data: vgdaysweek by mhyear
## t = -0.14358, df = 166.81, p-value = 0.886
## alternative hypothesis: true difference in means is not equal to 0
## 95 percent confidence interval:
```

```
## -0.7263392 0.6278543
## sample estimates:
## mean in group 0 mean in group 1
##      5.284091      5.333333
```

## Study 2

```
(vgdaysweek_depressionyear_ds2 <- t.test(vgdaysweek ~ mhyear,
data=ds2depression))
```

```
##
## Welch Two Sample t-test
##
## data:  vgdaysweek by mhyear
## t = -0.4071, df = 210.3, p-value = 0.6843
## alternative hypothesis: true difference in means is not equal to 0
## 95 percent confidence interval:
## -0.6577168 0.4325596
## sample estimates:
## mean in group 0 mean in group 1
##      4.820755      4.933333
```

## MD

### Hours per day

#### *#Study 1*

```
depressionyear_yes_ds1_vghrsday <- subset(depressionyear_yes_ds1, select
= c(vghrsday)) #Subset 1i data
depressionyear_vghrsday_m1i <- apply(depressionyear_yes_ds1_vghrsday, 2,
mean) #Calculate m1i
depressionyear_vghrsday_sd1i <- apply(depressionyear_yes_ds1_vghrsday,
2, sd) #Calculate sd1i
depressionyear_vghrsday_n1i <- colSums(!
is.na(depressionyear_yes_ds1_vghrsday)) #Calculate n1i
depressionyear_no_ds1_vghrsday <- subset(depressionyear_no_ds1, select =
c(vghrsday)) #Subset 2i data
depressionyear_vghrsday_m2i <- apply(depressionyear_no_ds1_vghrsday, 2,
mean) #Calculate m2i
depressionyear_vghrsday_sd2i <- apply(depressionyear_no_ds1_vghrsday, 2,
sd) #Calculate sd2i
depressionyear_vghrsday_n2i <- colSums(!
is.na(depressionyear_no_ds1_vghrsday)) #Calculate n2i
ds1depressionyear_meta <- data.frame(m1i = depressionyear_vghrsday_m1i,
sd1i = depressionyear_vghrsday_sd1i, n1i = depressionyear_vghrsday_n1i,
m2i = depressionyear_vghrsday_m2i, sd2i = depressionyear_vghrsday_sd2i,
n2i = depressionyear_vghrsday_n2i) #MA dataframe
ds1depressionyear_meta <- escalc(measure="MD", m1i = m1i, sd1i = sd1i,
```

```

n1i = n1i, m2i = m2i, sd2i = sd2i, n2i = n2i, data=ds1depressionyear_meta)
#Calculate yi and vi

#Study 2
depressionyear_yes_ds2_vghrsday <- subset(depressionyear_yes_ds2, select
= c(vghrsday)) #Subset 1i data
depressionyear_vghrsday_m1i <- apply(depressionyear_yes_ds2_vghrsday, 2,
mean) #Calculate m1i
depressionyear_vghrsday_sd1i <- apply(depressionyear_yes_ds2_vghrsday,
2, sd) #Calculate sd1i
depressionyear_vghrsday_n1i <- colSums(!
is.na(depressionyear_yes_ds2_vghrsday)) #Calculate n1i
depressionyear_no_ds2_vghrsday <- subset(depressionyear_no_ds2, select =
c(vghrsday)) #Subset 2i data
depressionyear_vghrsday_m2i <- apply(depressionyear_no_ds2_vghrsday, 2,
mean) #Calculate m2i
depressionyear_vghrsday_sd2i <- apply(depressionyear_no_ds2_vghrsday, 2,
sd) #Calculate sd2i
depressionyear_vghrsday_n2i <- colSums(!
is.na(depressionyear_no_ds2_vghrsday)) #Calculate n2i
ds2depressionyear_meta <- data.frame(m1i = depressionyear_vghrsday_m1i,
sd1i = depressionyear_vghrsday_sd1i, n1i = depressionyear_vghrsday_n1i,
m2i = depressionyear_vghrsday_m2i, sd2i = depressionyear_vghrsday_sd2i,
n2i = depressionyear_vghrsday_n2i) #MA dataframe
ds2depressionyear_meta <- escalc(measure="MD", m1i = m1i, sd1i = sd1i,
n1i = n1i, m2i = m2i, sd2i = sd2i, n2i = n2i, data=ds2depressionyear_meta)
#Calculate yi and vi

#FE meta-analysis
(depressionyear_meta <- rbind(ds1depressionyear_meta,
ds2depressionyear_meta))

##      m1i  sd1i n1i   m2i  sd2i n2i   yi  vi
## 1 2.395062 1.828107 81 2.806818 2.078118 88 -0.4118 0.0903
## 2 4.096970 3.819437 165 3.603774 3.006910 106 0.4932 0.1737

(depressionyear_vghrsday_meta <- rma(yi=yi, vi=vi, measure="MD",
method="FE", data=depressionyear_meta))

##
## Fixed-Effects Model (k = 2)
##
## Test for Heterogeneity:
## Q(df = 1) = 3.1015, p-val = 0.0782
##
## Model Results:
##
## estimate    se    zval    pval  ci.lb  ci.ub
## -0.1022  0.2438 -0.4191  0.6752 -0.5800  0.3756
##

```

```
## ---  
## Signif. codes:  0 '***' 0.001 '**' 0.01 '*' 0.05 '.' 0.1 ' ' 1
```

## Hours per week

```
#Study 1  
depressionyear_yes_ds1_vghrsweek <- subset(depressionyear_yes_ds1,  
select = c(vghrsweek)) #Subset 1i data  
depressionyear_vghrsweek_m1i <-  
apply(depressionyear_yes_ds1_vghrsweek, 2, mean) #Calculate m1i  
depressionyear_vghrsweek_sd1i <-  
apply(depressionyear_yes_ds1_vghrsweek, 2, sd) #Calculate sd1i  
depressionyear_vghrsweek_n1i <- colSums(!  
is.na(depressionyear_yes_ds1_vghrsweek)) #Calculate n1i  
depressionyear_no_ds1_vghrsweek <- subset(depressionyear_no_ds1, select  
= c(vghrsweek)) #Subset 2i data  
depressionyear_vghrsweek_m2i <- apply(depressionyear_no_ds1_vghrsweek,  
2, mean) #Calculate m2i  
depressionyear_vghrsweek_sd2i <- apply(depressionyear_no_ds1_vghrsweek,  
2, sd) #Calculate sd2i  
depressionyear_vghrsweek_n2i <- colSums(!  
is.na(depressionyear_no_ds1_vghrsweek)) #Calculate n2i  
ds1depressionyear_meta <- data.frame(m1i =  
depressionyear_vghrsweek_m1i, sd1i = depressionyear_vghrsweek_sd1i, n1i  
= depressionyear_vghrsweek_n1i, m2i = depressionyear_vghrsweek_m2i,  
sd2i = depressionyear_vghrsweek_sd2i, n2i =  
depressionyear_vghrsweek_n2i) #MA dataframe  
ds1depressionyear_meta <- escale(measure="MD", m1i = m1i, sd1i = sd1i,  
n1i = n1i, m2i = m2i, sd2i = sd2i, n2i = n2i, data=ds1depressionyear_meta)  
#Calculate yi and vi
```

```
#Study 2  
depressionyear_yes_ds2_vghrsweek <- subset(depressionyear_yes_ds2,  
select = c(vghrsweek)) #Subset 1i data  
depressionyear_vghrsweek_m1i <-  
apply(depressionyear_yes_ds2_vghrsweek, 2, mean) #Calculate m1i  
depressionyear_vghrsweek_sd1i <-  
apply(depressionyear_yes_ds2_vghrsweek, 2, sd) #Calculate sd1i  
depressionyear_vghrsweek_n1i <- colSums(!  
is.na(depressionyear_yes_ds2_vghrsweek)) #Calculate n1i  
depressionyear_no_ds2_vghrsweek <- subset(depressionyear_no_ds2, select  
= c(vghrsweek)) #Subset 2i data  
depressionyear_vghrsweek_m2i <- apply(depressionyear_no_ds2_vghrsweek,  
2, mean) #Calculate m2i  
depressionyear_vghrsweek_sd2i <- apply(depressionyear_no_ds2_vghrsweek,  
2, sd) #Calculate sd2i  
depressionyear_vghrsweek_n2i <- colSums(!  
is.na(depressionyear_no_ds2_vghrsweek)) #Calculate n2i  
ds2depressionyear_meta <- data.frame(m1i =
```

```
depressionyear_vghrsweek_m1i, sd1i = depressionyear_vghrsweek_sd1i, n1i
= depressionyear_vghrsweek_n1i, m2i = depressionyear_vghrsweek_m2i,
sd2i = depressionyear_vghrsweek_sd2i, n2i =
depressionyear_vghrsweek_n2i) #MA dataframe
ds2depressionyear_meta <- escalc(measure="MD", m1i = m1i, sd1i = sd1i,
n1i = n1i, m2i = m2i, sd2i = sd2i, n2i = n2i, data=ds2depressionyear_meta)
#Calculate yi and vi
```

```
#FE meta-analysis
```

```
(depressionyear_meta <- rbind(ds1depressionyear_meta,
ds2depressionyear_meta))
```

```
##      m1i  sd1i n1i  m2i  sd2i n2i  yi  vi
## 1 13.51852 13.39600 81 16.63636 15.98576 88 -3.1178 5.1194
## 2 22.19394 26.02482 165 19.50943 21.44506 106 2.6845 8.4434
```

```
(depressionyear_vghrsweek_meta <- rma(yi=yi, vi=vi, measure="MD",
method="FE", data=depressionyear_meta))
```

```
##
```

```
## Fixed-Effects Model (k = 2)
```

```
##
```

```
## Test for Heterogeneity:
```

```
## Q(df = 1) = 2.4823, p-val = 0.1151
```

```
##
```

```
## Model Results:
```

```
##
```

```
## estimate    se    zval    pval  ci.lb  ci.ub
## -0.9277  1.7852 -0.5197  0.6033 -4.4267  2.5713
```

```
##
```

```
## ---
```

```
## Signif. codes:  0 '***' 0.001 '**' 0.01 '*' 0.05 '.' 0.1 ' ' 1
```

## Days per week

```
#Study 1
```

```
depressionyear_yes_ds1_vgdaysweek <- subset(depressionyear_yes_ds1,
select = c(vgdaysweek)) #Subset 1i data
```

```
depressionyear_vgdaysweek_m1i <-
```

```
apply(depressionyear_yes_ds1_vgdaysweek, 2, mean) #Calculate m1i
```

```
depressionyear_vgdaysweek_sd1i <-
```

```
apply(depressionyear_yes_ds1_vgdaysweek, 2, sd) #Calculate sd1i
```

```
depressionyear_vgdaysweek_n1i <- colSums(!
```

```
is.na(depressionyear_yes_ds1_vgdaysweek)) #Calculate n1i
```

```
depressionyear_no_ds1_vgdaysweek <- subset(depressionyear_no_ds1,
select = c(vgdaysweek)) #Subset 2i data
```

```
depressionyear_vgdaysweek_m2i <-
```

```
apply(depressionyear_no_ds1_vgdaysweek, 2, mean) #Calculate m2i
```

```
depressionyear_vgdaysweek_sd2i <-
```

```
apply(depressionyear_no_ds1_vgdaysweek, 2, sd) #Calculate sd2i
```



```

depressionyear_vgdaysweek_n2i <- colSums(!
is.na(depressionyear_no_ds1_vgdaysweek)) #Calculate n2i
ds1depressionyear_meta <- data.frame(m1i =
depressionyear_vgdaysweek_m1i, sd1i = depressionyear_vgdaysweek_sd1i,
n1i = depressionyear_vgdaysweek_n1i, m2i =
depressionyear_vgdaysweek_m2i, sd2i = depressionyear_vgdaysweek_sd2i,
n2i = depressionyear_vgdaysweek_n2i) #MA dataframe
ds1depressionyear_meta <- escalc(measure="MD", m1i = m1i, sd1i = sd1i,
n1i = n1i, m2i = m2i, sd2i = sd2i, n2i = n2i, data=ds1depressionyear_meta)
#Calculate yi and vi

```

### *#Study 2*

```

depressionyear_yes_ds2_vgdaysweek <- subset(depressionyear_yes_ds2,
select = c(vgdaysweek)) #Subset 1i data
depressionyear_vgdaysweek_m1i <-
apply(depressionyear_yes_ds2_vgdaysweek, 2, mean) #Calculate m1i
depressionyear_vgdaysweek_sd1i <-
apply(depressionyear_yes_ds2_vgdaysweek, 2, sd) #Calculate sd1i
depressionyear_vgdaysweek_n1i <- colSums(!
is.na(depressionyear_yes_ds2_vgdaysweek)) #Calculate n1i
depressionyear_no_ds2_vgdaysweek <- subset(depressionyear_no_ds2,
select = c(vgdaysweek)) #Subset 2i data
depressionyear_vgdaysweek_m2i <-
apply(depressionyear_no_ds2_vgdaysweek, 2, mean) #Calculate m2i
depressionyear_vgdaysweek_sd2i <-
apply(depressionyear_no_ds2_vgdaysweek, 2, sd) #Calculate sd2i
depressionyear_vgdaysweek_n2i <- colSums(!
is.na(depressionyear_no_ds2_vgdaysweek)) #Calculate n2i
ds2depressionyear_meta <- data.frame(m1i =
depressionyear_vgdaysweek_m1i, sd1i = depressionyear_vgdaysweek_sd1i,
n1i = depressionyear_vgdaysweek_n1i, m2i =
depressionyear_vgdaysweek_m2i, sd2i = depressionyear_vgdaysweek_sd2i,
n2i = depressionyear_vgdaysweek_n2i) #MA dataframe
ds2depressionyear_meta <- escalc(measure="MD", m1i = m1i, sd1i = sd1i,
n1i = n1i, m2i = m2i, sd2i = sd2i, n2i = n2i, data=ds2depressionyear_meta)
#Calculate yi and vi

```

### *#FE meta-analysis*

```

(depressionyear_meta <- rbind(ds1depressionyear_meta,
ds2depressionyear_meta))

```

```

##      m1i  sd1i n1i  m2i  sd2i n2i  yi  vi
## 1 5.333333 2.173707 81 5.284091 2.284122 88 0.0492 0.1176
## 2 4.933333 2.107285 165 4.820755 2.292003 106 0.1126 0.0765

```

```

(depressionyear_vgdaysweek_meta <- rma(yi=yi, vi=vi, measure="MD",
method="FE", data=depressionyear_meta))

```

```

##
## Fixed-Effects Model (k = 2)
##

```

```

## Test for Heterogeneity:
## Q(df = 1) = 0.0207, p-val = 0.8857
##
## Model Results:
##
## estimate      se    zval    pval  ci.lb  ci.ub
## 0.0876  0.2153  0.4070  0.6840 -0.3343  0.5096
##
## ---
## Signif. codes:  0 '***' 0.001 '**' 0.01 '*' 0.05 '.' 0.1 ' ' 1

```

## Depression care - month

### Replicated Effect

#### Hours per day

##### Study 1

```
(vghrsday_depressionmonth_ds1 <- t.test(vghrsday ~ mhmonth,
data=ds1depression))
```

```

##
## Welch Two Sample t-test
##
## data: vghrsday by mhmonth
## t = -1.4666, df = 38.807, p-value = 0.1505
## alternative hypothesis: true difference in means is not equal to 0
## 95 percent confidence interval:
## -1.5155007  0.2416398
## sample estimates:
## mean in group 0 mean in group 1
##      2.496403      3.133333

```

##### Study 2

```
(vghrsday_depressionmonth_ds2 <- t.test(vghrsday ~ mhmonth,
data=ds2depression))
```

```

##
## Welch Two Sample t-test
##
## data: vghrsday by mhmonth
## t = 0.70652, df = 154.02, p-value = 0.4809
## alternative hypothesis: true difference in means is not equal to 0
## 95 percent confidence interval:
## -0.5548928  1.1727801

```

```
## sample estimates:  
## mean in group 0 mean in group 1  
##      3.985000      3.676056
```

## Hours per week

### Study 1

```
(vghrsweek_depressionmonth_ds1 <- t.test(vghrsweek ~ mhmonth,  
data=ds1depression))
```

```
##  
## Welch Two Sample t-test  
##  
## data: vghrsweek by mhmonth  
## t = -1.2268, df = 39.024, p-value = 0.2272  
## alternative hypothesis: true difference in means is not equal to 0  
## 95 percent confidence interval:  
## -10.59930  2.59594  
## sample estimates:  
## mean in group 0 mean in group 1  
##      14.43165      18.43333
```

### Study 2

```
(vghrsweek_depressionmonth_ds2 <- t.test(vghrsweek ~ mhmonth,  
data=ds2depression))
```

```
##  
## Welch Two Sample t-test  
##  
## data: vghrsweek by mhmonth  
## t = 1.0685, df = 155.14, p-value = 0.287  
## alternative hypothesis: true difference in means is not equal to 0  
## 95 percent confidence interval:  
## -2.724875  9.145579  
## sample estimates:  
## mean in group 0 mean in group 1  
##      21.98500      18.77465
```

## Days per week

### Study 1

```
(vgdaysweek_depressionmonth_ds1 <- t.test(vgdaysweek ~ mhmonth,  
data=ds1depression))
```

```
##
## Welch Two Sample t-test
##
## data: vgdaysweek by mhmonth
## t = -0.71491, df = 43.295, p-value = 0.4785
## alternative hypothesis: true difference in means is not equal to 0
## 95 percent confidence interval:
## -1.2029034 0.5731672
## sample estimates:
## mean in group 0 mean in group 1
##      5.251799      5.566667
```

## Study 2

```
(vgdaysweek_depressionmonth_ds2 <- t.test(vgdaysweek ~ mhmonth,
data=ds2depression))
```

```
##
## Welch Two Sample t-test
##
## data: vgdaysweek by mhmonth
## t = 0.074803, df = 131.7, p-value = 0.9405
## alternative hypothesis: true difference in means is not equal to 0
## 95 percent confidence interval:
## -0.5536870 0.5972082
## sample estimates:
## mean in group 0 mean in group 1
##      4.895000      4.873239
```

## MD

### Hours per day

#### *#Study 1*

```
depressionmonth_yes_ds1_vghrsday <- subset(depressionmonth_yes_ds1,
select = c(vghrsday)) #Subset 1i data
depressionmonth_vghrsday_m1i <-
apply(depressionmonth_yes_ds1_vghrsday, 2, mean) #Calculate m1i
depressionmonth_vghrsday_sd1i <-
apply(depressionmonth_yes_ds1_vghrsday, 2, sd) #Calculate sd1i
depressionmonth_vghrsday_n1i <- colSums(!
is.na(depressionmonth_yes_ds1_vghrsday)) #Calculate n1i
depressionmonth_no_ds1_vghrsday <- subset(depressionmonth_no_ds1,
select = c(vghrsday)) #Subset 2i data
depressionmonth_vghrsday_m2i <-
apply(depressionmonth_no_ds1_vghrsday, 2, mean) #Calculate m2i
depressionmonth_vghrsday_sd2i <-
apply(depressionmonth_no_ds1_vghrsday, 2, sd) #Calculate sd2i
```

```

depressionmonth_vghrsday_n2i <- colSums(!
is.na(depressionmonth_no_ds1_vghrsday)) #Calculate n2i
ds1depressionmonth_meta <- data.frame(m1i =
depressionmonth_vghrsday_m1i, sd1i = depressionmonth_vghrsday_sd1i, n1i
= depressionmonth_vghrsday_n1i, m2i = depressionmonth_vghrsday_m2i,
sd2i = depressionmonth_vghrsday_sd2i, n2i =
depressionmonth_vghrsday_n2i) #MA dataframe
ds1depressionmonth_meta <- escalc(measure="MD", m1i = m1i, sd1i = sd1i,
n1i = n1i, m2i = m2i, sd2i = sd2i, n2i = n2i,
data=ds1depressionmonth_meta) #Calculate yi and vi

```

### #Study 2

```

depressionmonth_yes_ds2_vghrsday <- subset(depressionmonth_yes_ds2,
select = c(vghrsday)) #Subset 1i data
depressionmonth_vghrsday_m1i <-
apply(depressionmonth_yes_ds2_vghrsday, 2, mean) #Calculate m1i
depressionmonth_vghrsday_sd1i <-
apply(depressionmonth_yes_ds2_vghrsday, 2, sd) #Calculate sd1i
depressionmonth_vghrsday_n1i <- colSums(!
is.na(depressionmonth_yes_ds2_vghrsday)) #Calculate n1i
depressionmonth_no_ds2_vghrsday <- subset(depressionmonth_no_ds2,
select = c(vghrsday)) #Subset 2i data
depressionmonth_vghrsday_m2i <-
apply(depressionmonth_no_ds2_vghrsday, 2, mean) #Calculate m2i
depressionmonth_vghrsday_sd2i <-
apply(depressionmonth_no_ds2_vghrsday, 2, sd) #Calculate sd2i
depressionmonth_vghrsday_n2i <- colSums(!
is.na(depressionmonth_no_ds2_vghrsday)) #Calculate n2i
ds2depressionmonth_meta <- data.frame(m1i =
depressionmonth_vghrsday_m1i, sd1i = depressionmonth_vghrsday_sd1i, n1i
= depressionmonth_vghrsday_n1i, m2i = depressionmonth_vghrsday_m2i,
sd2i = depressionmonth_vghrsday_sd2i, n2i =
depressionmonth_vghrsday_n2i) #MA dataframe
ds2depressionmonth_meta <- escalc(measure="MD", m1i = m1i, sd1i = sd1i,
n1i = n1i, m2i = m2i, sd2i = sd2i, n2i = n2i,
data=ds2depressionmonth_meta) #Calculate yi and vi

```

### #FE meta-analysis

```

(depressionmonth_meta <- rbind(ds1depressionmonth_meta,
ds2depressionmonth_meta))

```

```

##      m1i  sd1i n1i  m2i  sd2i n2i  yi  vi
## 1 3.133333 2.208656 30 2.496403 1.901083 139 0.6369 0.1886
## 2 3.676056 2.946061 71 3.985000 3.713993 200 -0.3089 0.1912

```

```

(depressionmonth_vghrsday_meta <- rma(yi=yi, vi=vi, measure="MD",
method="FE", data=depressionmonth_meta))

```

```

##
## Fixed-Effects Model (k = 2)
##

```

```

## Test for Heterogeneity:
## Q(df = 1) = 2.3555, p-val = 0.1248
##
## Model Results:
##
## estimate    se    zval    pval    ci.lb    ci.ub
## 0.1672  0.3081  0.5427  0.5873 -0.4367  0.7712
##
## ---
## Signif. codes:  0 '***' 0.001 '**' 0.01 '*' 0.05 '.' 0.1 ' ' 1

```

## Hours per week

### #Study 1

```

depressionmonth_yes_ds1_vghrsweek <- subset(depressionmonth_yes_ds1,
select = c(vghrsweek)) #Subset 1i data
depressionmonth_vghrsweek_m1i <-
apply(depressionmonth_yes_ds1_vghrsweek, 2, mean) #Calculate m1i
depressionmonth_vghrsweek_sd1i <-
apply(depressionmonth_yes_ds1_vghrsweek, 2, sd) #Calculate sd1i
depressionmonth_vghrsweek_n1i <- colSums(!
is.na(depressionmonth_yes_ds1_vghrsweek)) #Calculate n1i
depressionmonth_no_ds1_vghrsweek <- subset(depressionmonth_no_ds1,
select = c(vghrsweek)) #Subset 2i data
depressionmonth_vghrsweek_m2i <-
apply(depressionmonth_no_ds1_vghrsweek, 2, mean) #Calculate m2i
depressionmonth_vghrsweek_sd2i <-
apply(depressionmonth_no_ds1_vghrsweek, 2, sd) #Calculate sd2i
depressionmonth_vghrsweek_n2i <- colSums(!
is.na(depressionmonth_no_ds1_vghrsweek)) #Calculate n2i
ds1depressionmonth_meta <- data.frame(m1i =
depressionmonth_vghrsweek_m1i, sd1i = depressionmonth_vghrsweek_sd1i,
n1i = depressionmonth_vghrsweek_n1i, m2i =
depressionmonth_vghrsweek_m2i, sd2i = depressionmonth_vghrsweek_sd2i,
n2i = depressionmonth_vghrsweek_n2i) #MA dataframe
ds1depressionmonth_meta <- escalc(measure="MD", m1i = m1i, sd1i = sd1i,
n1i = n1i, m2i = m2i, sd2i = sd2i, n2i = n2i,
data=ds1depressionmonth_meta) #Calculate yi and vi

```

### #Study 2

```

depressionmonth_yes_ds2_vghrsweek <- subset(depressionmonth_yes_ds2,
select = c(vghrsweek)) #Subset 1i data
depressionmonth_vghrsweek_m1i <-
apply(depressionmonth_yes_ds2_vghrsweek, 2, mean) #Calculate m1i
depressionmonth_vghrsweek_sd1i <-
apply(depressionmonth_yes_ds2_vghrsweek, 2, sd) #Calculate sd1i
depressionmonth_vghrsweek_n1i <- colSums(!
is.na(depressionmonth_yes_ds2_vghrsweek)) #Calculate n1i
depressionmonth_no_ds2_vghrsweek <- subset(depressionmonth_no_ds2,

```

```

select = c(vghrsweek)) #Subset 2i data
depressionmonth_vghrsweek_m2i <-
apply(depressionmonth_no_ds2_vghrsweek, 2, mean) #Calculate m2i
depressionmonth_vghrsweek_sd2i <-
apply(depressionmonth_no_ds2_vghrsweek, 2, sd) #Calculate sd2i
depressionmonth_vghrsweek_n2i <- colSums(!
is.na(depressionmonth_no_ds2_vghrsweek)) #Calculate n2i
ds2depressionmonth_meta <- data.frame(m1i =
depressionmonth_vghrsweek_m1i, sd1i = depressionmonth_vghrsweek_sd1i,
n1i = depressionmonth_vghrsweek_n1i, m2i =
depressionmonth_vghrsweek_m2i, sd2i = depressionmonth_vghrsweek_sd2i,
n2i = depressionmonth_vghrsweek_n2i) #MA dataframe
ds2depressionmonth_meta <- escalc(measure="MD", m1i = m1i, sd1i = sd1i,
n1i = n1i, m2i = m2i, sd2i = sd2i, n2i = n2i,
data=ds2depressionmonth_meta) #Calculate yi and vi

```

### #FE meta-analysis

```

(depressionmonth_meta <- rbind(ds1depressionmonth_meta,
ds2depressionmonth_meta))

```

```

##      m1i  sd1i n1i   m2i  sd2i n2i   yi   vi
## 1 18.43333 16.56478 30 14.43165 14.40765 139 4.0017 10.6398
## 2 18.77465 20.19208 71 21.98500 25.63259 200 -3.2104 9.0277

```

```

(depressionmonth_vghrsweek_meta <- rma(yi=yi, vi=vi, measure="MD",
method="FE", data=depressionmonth_meta))

```

```

##
## Fixed-Effects Model (k = 2)
##
## Test for Heterogeneity:
## Q(df = 1) = 2.6446, p-val = 0.1039
##
## Model Results:
##
## estimate      se    zval    pval  ci.lb  ci.ub
## 0.1001  2.2099  0.0453  0.9639 -4.2313  4.4315
##
## ---
## Signif. codes:  0 '***' 0.001 '**' 0.01 '*' 0.05 '.' 0.1 ' ' 1

```

## Days per week

### #Study 1

```

depressionmonth_yes_ds1_vgdaysweek <- subset(depressionmonth_yes_ds1,
select = c(vgdaysweek)) #Subset 1i data
depressionmonth_vgdaysweek_m1i <-
apply(depressionmonth_yes_ds1_vgdaysweek, 2, mean) #Calculate m1i
depressionmonth_vgdaysweek_sd1i <-
apply(depressionmonth_yes_ds1_vgdaysweek, 2, sd) #Calculate sd1i

```

```

depressionmonth_vgdaysweek_n1i <- colSums(!
is.na(depressionmonth_yes_ds1_vgdaysweek)) #Calculate n1i
depressionmonth_no_ds1_vgdaysweek <- subset(depressionmonth_no_ds1,
select = c(vgdaysweek)) #Subset 2i data
depressionmonth_vgdaysweek_m2i <-
apply(depressionmonth_no_ds1_vgdaysweek, 2, mean) #Calculate m2i
depressionmonth_vgdaysweek_sd2i <-
apply(depressionmonth_no_ds1_vgdaysweek, 2, sd) #Calculate sd2i
depressionmonth_vgdaysweek_n2i <- colSums(!
is.na(depressionmonth_no_ds1_vgdaysweek)) #Calculate n2i
ds1depressionmonth_meta <- data.frame(m1i =
depressionmonth_vgdaysweek_m1i, sd1i =
depressionmonth_vgdaysweek_sd1i, n1i =
depressionmonth_vgdaysweek_n1i, m2i =
depressionmonth_vgdaysweek_m2i, sd2i =
depressionmonth_vgdaysweek_sd2i, n2i =
depressionmonth_vgdaysweek_n2i) #MA dataframe
ds1depressionmonth_meta <- escalc(measure="MD", m1i = m1i, sd1i = sd1i,
n1i = n1i, m2i = m2i, sd2i = sd2i, n2i = n2i,
data=ds1depressionmonth_meta) #Calculate yi and vi

```

#### #Study 2

```

depressionmonth_yes_ds2_vgdaysweek <- subset(depressionmonth_yes_ds2,
select = c(vgdaysweek)) #Subset 1i data
depressionmonth_vgdaysweek_m1i <-
apply(depressionmonth_yes_ds2_vgdaysweek, 2, mean) #Calculate m1i
depressionmonth_vgdaysweek_sd1i <-
apply(depressionmonth_yes_ds2_vgdaysweek, 2, sd) #Calculate sd1i
depressionmonth_vgdaysweek_n1i <- colSums(!
is.na(depressionmonth_yes_ds2_vgdaysweek)) #Calculate n1i
depressionmonth_no_ds2_vgdaysweek <- subset(depressionmonth_no_ds2,
select = c(vgdaysweek)) #Subset 2i data
depressionmonth_vgdaysweek_m2i <-
apply(depressionmonth_no_ds2_vgdaysweek, 2, mean) #Calculate m2i
depressionmonth_vgdaysweek_sd2i <-
apply(depressionmonth_no_ds2_vgdaysweek, 2, sd) #Calculate sd2i
depressionmonth_vgdaysweek_n2i <- colSums(!
is.na(depressionmonth_no_ds2_vgdaysweek)) #Calculate n2i
ds2depressionmonth_meta <- data.frame(m1i =
depressionmonth_vgdaysweek_m1i, sd1i =
depressionmonth_vgdaysweek_sd1i, n1i =
depressionmonth_vgdaysweek_n1i, m2i =
depressionmonth_vgdaysweek_m2i, sd2i =
depressionmonth_vgdaysweek_sd2i, n2i =
depressionmonth_vgdaysweek_n2i) #MA dataframe
ds2depressionmonth_meta <- escalc(measure="MD", m1i = m1i, sd1i = sd1i,
n1i = n1i, m2i = m2i, sd2i = sd2i, n2i = n2i,
data=ds2depressionmonth_meta) #Calculate yi and vi

```

#### #FE meta-analysis



```

(depressionmonth_meta <- rbind(ds1depressionmonth_meta,
ds2depressionmonth_meta))

##      mli  sd1i n1i  m2i  sd2i n2i  yi  vi
## 1 5.566667 2.176415 30 5.251799 2.239609 139 0.3149 0.1940
## 2 4.873239 2.062797 71 4.895000 2.222311 200 -0.0218 0.0846

(depressionmonth_vgdaysweek_meta <- rma(yi=yi, vi=vi, measure="MD",
method="FE", data=depressionmonth_meta))

##
## Fixed-Effects Model (k = 2)
##
## Test for Heterogeneity:
## Q(df = 1) = 0.4067, p-val = 0.5236
##
## Model Results:
##
## estimate    se    zval    pval    ci.lb    ci.ub
## 0.0805    0.2427    0.3316    0.7402   -0.3953    0.5562
##
## ---
## Signif. codes:  0 '***' 0.001 '**' 0.01 '*' 0.05 '.' 0.1 ' ' 1

```

## Any SUD - discharge

### Replicated Effect

#### Hours per day

##### Study 1

```

(vghrsday_anysudscreendis_ds1 <- t.test(vghrsday ~ alcsuddis,
data=ds1anysudscreendis))

```

```

##
## Welch Two Sample t-test
##
## data: vghrsday by alcsuddis
## t = -1.3424, df = 58.109, p-value = 0.1847
## alternative hypothesis: true difference in means is not equal to 0
## 95 percent confidence interval:
## -1.0248867 0.2020385
## sample estimates:
## mean in group 0 mean in group 1
## 2.077465 2.488889

```

## Study 2

```
(vghrsday_anysudscreendis_ds2 <- t.test(vghrsday ~ alcsuddis,  
data=ds2anysudscreendis))
```

```
##  
## Welch Two Sample t-test  
##  
## data: vghrsday by alcsuddis  
## t = 0.98905, df = 132.12, p-value = 0.3244  
## alternative hypothesis: true difference in means is not equal to 0  
## 95 percent confidence interval:  
## -0.371894 1.115702  
## sample estimates:  
## mean in group 0 mean in group 1  
## 3.660793 3.288889
```

## Hours per week

### Study 1

```
(vghrsweek_anysudscreendis_ds1 <- t.test(vghrsweek ~ alcsuddis,  
data=ds1anysudscreendis))
```

```
##  
## Welch Two Sample t-test  
##  
## data: vghrsweek by alcsuddis  
## t = -2.1523, df = 59.465, p-value = 0.03544  
## alternative hypothesis: true difference in means is not equal to 0  
## 95 percent confidence interval:  
## -9.2333783 -0.3372008  
## sample estimates:  
## mean in group 0 mean in group 1  
## 10.85915 15.64444
```

### Study 2

```
(vghrsweek_anysudscreendis_ds2 <- t.test(vghrsweek ~ alcsuddis,  
data=ds2anysudscreendis))
```

```
##  
## Welch Two Sample t-test  
##  
## data: vghrsweek by alcsuddis  
## t = 0.94109, df = 143.29, p-value = 0.3482  
## alternative hypothesis: true difference in means is not equal to 0  
## 95 percent confidence interval:  
## -2.518879 7.097048  
## sample estimates:
```

```
## mean in group 0 mean in group 1
##    18.97797    16.68889
```

## Days per week

### Study 1

```
(vgdaysweek_anysudscreendis_ds1 <- t.test(vgdaysweek ~ alcsuddis,
data=ds1anysudscreendis))
```

```
##
## Welch Two Sample t-test
##
## data:  vgdaysweek by alcsuddis
## t = -3.4102, df = 93.98, p-value = 0.0009583
## alternative hypothesis: true difference in means is not equal to 0
## 95 percent confidence interval:
##  -1.7570534 -0.4639169
## sample estimates:
## mean in group 0 mean in group 1
##    4.845070    5.955556
```

### Study 2

```
(vgdaysweek_anysudscreendis_ds2 <- t.test(vgdaysweek ~ alcsuddis,
data=ds2anysudscreendis))
```

```
##
## Welch Two Sample t-test
##
## data:  vgdaysweek by alcsuddis
## t = -0.95005, df = 65.057, p-value = 0.3456
## alternative hypothesis: true difference in means is not equal to 0
## 95 percent confidence interval:
##  -1.0249259 0.3641329
## sample estimates:
## mean in group 0 mean in group 1
##    4.669604    5.000000
```

## MD

### Hours per day

#### *#Study 1*

```
anysudscreendis_yes_ds1_vghrsday <- subset(anysudscreendis_yes_ds1,
select = c(vghrsday)) #Subset 1i data
anysudscreendis_vghrsday_m1i <- apply(anysudscreendis_yes_ds1_vghrsday,
2, mean) #Calculate m1i
```

```

anysudscreendis_vghrsday_sd1i <-
apply(anysudscreendis_yes_ds1_vghrsday, 2, sd) #Calculate sd1i
anysudscreendis_vghrsday_n1i <- colSums(!
is.na(anysudscreendis_yes_ds1_vghrsday)) #Calculate n1i
anysudscreendis_no_ds1_vghrsday <- subset(anysudscreendis_no_ds1, select
= c(vghrsday)) #Subset 2i data
anysudscreendis_vghrsday_m2i <- apply(anysudscreendis_no_ds1_vghrsday,
2, mean) #Calculate m2i
anysudscreendis_vghrsday_sd2i <- apply(anysudscreendis_no_ds1_vghrsday,
2, sd) #Calculate sd2i
anysudscreendis_vghrsday_n2i <- colSums(!
is.na(anysudscreendis_no_ds1_vghrsday)) #Calculate n2i
ds1anysudscreendis_meta <- data.frame(m1i =
anysudscreendis_vghrsday_m1i, sd1i = anysudscreendis_vghrsday_sd1i, n1i
= anysudscreendis_vghrsday_n1i, m2i = anysudscreendis_vghrsday_m2i,
sd2i = anysudscreendis_vghrsday_sd2i, n2i = anysudscreendis_vghrsday_n2i)
#MA dataframe
ds1anysudscreendis_meta <- escalc(measure="MD", m1i = m1i, sd1i = sd1i,
n1i = n1i, m2i = m2i, sd2i = sd2i, n2i = n2i,
data=ds1anysudscreendis_meta) #Calculate yi and vi

```

#### #Study 2

```

anysudscreendis_yes_ds2_vghrsday <- subset(anysudscreendis_yes_ds2,
select = c(vghrsday)) #Subset 1i data
anysudscreendis_vghrsday_m1i <- apply(anysudscreendis_yes_ds2_vghrsday,
2, mean) #Calculate m1i
anysudscreendis_vghrsday_sd1i <-
apply(anysudscreendis_yes_ds2_vghrsday, 2, sd) #Calculate sd1i
anysudscreendis_vghrsday_n1i <- colSums(!
is.na(anysudscreendis_yes_ds2_vghrsday)) #Calculate n1i
anysudscreendis_no_ds2_vghrsday <- subset(anysudscreendis_no_ds2, select
= c(vghrsday)) #Subset 2i data
anysudscreendis_vghrsday_m2i <- apply(anysudscreendis_no_ds2_vghrsday,
2, mean) #Calculate m2i
anysudscreendis_vghrsday_sd2i <- apply(anysudscreendis_no_ds2_vghrsday,
2, sd) #Calculate sd2i
anysudscreendis_vghrsday_n2i <- colSums(!
is.na(anysudscreendis_no_ds2_vghrsday)) #Calculate n2i
ds2anysudscreendis_meta <- data.frame(m1i =
anysudscreendis_vghrsday_m1i, sd1i = anysudscreendis_vghrsday_sd1i, n1i
= anysudscreendis_vghrsday_n1i, m2i = anysudscreendis_vghrsday_m2i,
sd2i = anysudscreendis_vghrsday_sd2i, n2i = anysudscreendis_vghrsday_n2i)
#MA dataframe
ds2anysudscreendis_meta <- escalc(measure="MD", m1i = m1i, sd1i = sd1i,
n1i = n1i, m2i = m2i, sd2i = sd2i, n2i = n2i,
data=ds2anysudscreendis_meta) #Calculate yi and vi

```

#### #FE meta-analysis

```

(anysudscreendis_meta <- rbind(ds1anysudscreendis_meta,
ds2anysudscreendis_meta))

```

```

##      m1i  sd1i n1i  m2i  sd2i n2i  yi  vi
## 1 2.488889 1.914327 45 2.077465 1.331953 142 0.4114 0.0939
## 2 3.288889 1.854016 45 3.660793 3.841368 227 -0.3719 0.1414

(anysudscreendis_vghrsday_meta <- rma(yi=yi, vi=vi, measure="MD",
method="FE", data=anysudscreendis_meta))

##
## Fixed-Effects Model (k = 2)
##
## Test for Heterogeneity:
## Q(df = 1) = 2.6075, p-val = 0.1064
##
## Model Results:
##
## estimate      se    zval    pval  ci.lb  ci.ub
## 0.0988  0.2376  0.4157  0.6776 -0.3669  0.5644
##
## ---
## Signif. codes:  0 '***' 0.001 '**' 0.01 '*' 0.05 '.' 0.1 ' ' 1

```

## Hours per week

### #Study 1

```

anysudscreendis_yes_ds1_vghrsweek <- subset(anysudscreendis_yes_ds1,
select = c(vghrsweek)) #Subset 1i data
anysudscreendis_vghrsweek_m1i <-
apply(anysudscreendis_yes_ds1_vghrsweek, 2, mean) #Calculate m1i
anysudscreendis_vghrsweek_sd1i <-
apply(anysudscreendis_yes_ds1_vghrsweek, 2, sd) #Calculate sd1i
anysudscreendis_vghrsweek_n1i <- colSums(!
is.na(anysudscreendis_yes_ds1_vghrsweek)) #Calculate n1i
anysudscreendis_no_ds1_vghrsweek <- subset(anysudscreendis_no_ds1,
select = c(vghrsweek)) #Subset 2i data
anysudscreendis_vghrsweek_m2i <-
apply(anysudscreendis_no_ds1_vghrsweek, 2, mean) #Calculate m2i
anysudscreendis_vghrsweek_sd2i <-
apply(anysudscreendis_no_ds1_vghrsweek, 2, sd) #Calculate sd2i
anysudscreendis_vghrsweek_n2i <- colSums(!
is.na(anysudscreendis_no_ds1_vghrsweek)) #Calculate n2i
ds1anysudscreendis_meta <- data.frame(m1i =
anysudscreendis_vghrsweek_m1i, sd1i = anysudscreendis_vghrsweek_sd1i,
n1i = anysudscreendis_vghrsweek_n1i, m2i =
anysudscreendis_vghrsweek_m2i, sd2i = anysudscreendis_vghrsweek_sd2i,
n2i = anysudscreendis_vghrsweek_n2i) #MA dataframe
ds1anysudscreendis_meta <- escalc(measure="MD", m1i = m1i, sd1i = sd1i,
n1i = n1i, m2i = m2i, sd2i = sd2i, n2i = n2i,
data=ds1anysudscreendis_meta) #Calculate yi and vi

```

## #Study 2

```
anysudscreendis_yes_ds2_vghrsweek <- subset(anysudscreendis_yes_ds2,
select = c(vghrsweek)) #Subset 1i data
anysudscreendis_vghrsweek_m1i <-
apply(anysudscreendis_yes_ds2_vghrsweek, 2, mean) #Calculate m1i
anysudscreendis_vghrsweek_sd1i <-
apply(anysudscreendis_yes_ds2_vghrsweek, 2, sd) #Calculate sd1i
anysudscreendis_vghrsweek_n1i <- colSums(!
is.na(anysudscreendis_yes_ds2_vghrsweek)) #Calculate n1i
anysudscreendis_no_ds2_vghrsweek <- subset(anysudscreendis_no_ds2,
select = c(vghrsweek)) #Subset 2i data
anysudscreendis_vghrsweek_m2i <-
apply(anysudscreendis_no_ds2_vghrsweek, 2, mean) #Calculate m2i
anysudscreendis_vghrsweek_sd2i <-
apply(anysudscreendis_no_ds2_vghrsweek, 2, sd) #Calculate sd2i
anysudscreendis_vghrsweek_n2i <- colSums(!
is.na(anysudscreendis_no_ds2_vghrsweek)) #Calculate n2i
ds2anysudscreendis_meta <- data.frame(m1i =
anysudscreendis_vghrsweek_m1i, sd1i = anysudscreendis_vghrsweek_sd1i,
n1i = anysudscreendis_vghrsweek_n1i, m2i =
anysudscreendis_vghrsweek_m2i, sd2i = anysudscreendis_vghrsweek_sd2i,
n2i = anysudscreendis_vghrsweek_n2i) #MA dataframe
ds2anysudscreendis_meta <- escalc(measure="MD", m1i = m1i, sd1i = sd1i,
n1i = n1i, m2i = m2i, sd2i = sd2i, n2i = n2i,
data=ds2anysudscreendis_meta) #Calculate yi and vi
```

## #FE meta-analysis

```
(anysudscreendis_meta <- rbind(ds1anysudscreendis_meta,
ds2anysudscreendis_meta))
```

```
##      m1i  sd1i n1i  m2i  sd2i n2i  yi  vi
## 1 15.64444 13.80243 45 10.85915 10.03794 142 4.7853 4.9431
## 2 16.68889 11.65571 45 18.97797 25.64589 227 -2.2891 5.9164
```

```
(anysudscreendis_vghrsweek_meta <- rma(yi=yi, vi=vi, measure="MD",
method="FE", data=anysudscreendis_meta))
```

```
##
```

```
## Fixed-Effects Model (k = 2)
```

```
##
```

```
## Test for Heterogeneity:
```

```
## Q(df = 1) = 4.6086, p-val = 0.0318
```

```
##
```

```
## Model Results:
```

```
##
```

```
## estimate    se    zval    pval  ci.lb  ci.ub
## 1.5651  1.6411  0.9537  0.3402 -1.6513  4.7816
```

```
##
```

```
## ---
```

```
## Signif. codes:  0 '***' 0.001 '**' 0.01 '*' 0.05 '.' 0.1 ' ' 1
```

## Days per week

### #Study 1

```
anysudscreendis_yes_ds1_vgdaysweek <- subset(anysudscreendis_yes_ds1,
select = c(vgdaysweek)) #Subset 1i data
anysudscreendis_vgdaysweek_m1i <-
apply(anysudscreendis_yes_ds1_vgdaysweek, 2, mean) #Calculate m1i
anysudscreendis_vgdaysweek_sd1i <-
apply(anysudscreendis_yes_ds1_vgdaysweek, 2, sd) #Calculate sd1i
anysudscreendis_vgdaysweek_n1i <- colSums(!
is.na(anysudscreendis_yes_ds1_vgdaysweek)) #Calculate n1i
anysudscreendis_no_ds1_vgdaysweek <- subset(anysudscreendis_no_ds1,
select = c(vgdaysweek)) #Subset 2i data
anysudscreendis_vgdaysweek_m2i <-
apply(anysudscreendis_no_ds1_vgdaysweek, 2, mean) #Calculate m2i
anysudscreendis_vgdaysweek_sd2i <-
apply(anysudscreendis_no_ds1_vgdaysweek, 2, sd) #Calculate sd2i
anysudscreendis_vgdaysweek_n2i <- colSums(!
is.na(anysudscreendis_no_ds1_vgdaysweek)) #Calculate n2i
ds1anysudscreendis_meta <- data.frame(m1i =
anysudscreendis_vgdaysweek_m1i, sd1i =
anysudscreendis_vgdaysweek_sd1i, n1i = anysudscreendis_vgdaysweek_n1i,
m2i = anysudscreendis_vgdaysweek_m2i, sd2i =
anysudscreendis_vgdaysweek_sd2i, n2i = anysudscreendis_vgdaysweek_n2i)
#MA dataframe
ds1anysudscreendis_meta <- escalc(measure="MD", m1i = m1i, sd1i = sd1i,
n1i = n1i, m2i = m2i, sd2i = sd2i, n2i = n2i,
data=ds1anysudscreendis_meta) #Calculate yi and vi
```

### #Study 2

```
anysudscreendis_yes_ds2_vgdaysweek <- subset(anysudscreendis_yes_ds2,
select = c(vgdaysweek)) #Subset 1i data
anysudscreendis_vgdaysweek_m1i <-
apply(anysudscreendis_yes_ds2_vgdaysweek, 2, mean) #Calculate m1i
anysudscreendis_vgdaysweek_sd1i <-
apply(anysudscreendis_yes_ds2_vgdaysweek, 2, sd) #Calculate sd1i
anysudscreendis_vgdaysweek_n1i <- colSums(!
is.na(anysudscreendis_yes_ds2_vgdaysweek)) #Calculate n1i
anysudscreendis_no_ds2_vgdaysweek <- subset(anysudscreendis_no_ds2,
select = c(vgdaysweek)) #Subset 2i data
anysudscreendis_vgdaysweek_m2i <-
apply(anysudscreendis_no_ds2_vgdaysweek, 2, mean) #Calculate m2i
anysudscreendis_vgdaysweek_sd2i <-
apply(anysudscreendis_no_ds2_vgdaysweek, 2, sd) #Calculate sd2i
anysudscreendis_vgdaysweek_n2i <- colSums(!
is.na(anysudscreendis_no_ds2_vgdaysweek)) #Calculate n2i
ds2anysudscreendis_meta <- data.frame(m1i =
anysudscreendis_vgdaysweek_m1i, sd1i =
anysudscreendis_vgdaysweek_sd1i, n1i = anysudscreendis_vgdaysweek_n1i,
```

```

m2i = anysudscreendis_vgdaysweek_m2i, sd2i =
anysudscreendis_vgdaysweek_sd2i, n2i = anysudscreendis_vgdaysweek_n2i)
#MA dataframe
ds2anysudscreendis_meta <- escalc(measure="MD", m1i = m1i, sd1i = sd1i,
n1i = n1i, m2i = m2i, sd2i = sd2i, n2i = n2i,
data=ds2anysudscreendis_meta) #Calculate yi and vi

#FE meta-analysis
(anysudscreendis_meta <- rbind(ds1anysudscreendis_meta,
ds2anysudscreendis_meta))

##      m1i  sd1i n1i  m2i  sd2i n2i  yi  vi
## 1 5.955556 1.770408 45 4.845070 2.273173 142 1.1105 0.1060
## 2 5.000000 2.110579 45 4.669604 2.232325 227 0.3304 0.1209

(anysudscreendis_vgdaysweek_meta <- rma(yi=yi, vi=vi, measure="MD",
method="FE", data=anysudscreendis_meta))

##
## Fixed-Effects Model (k = 2)
##
## Test for Heterogeneity:
## Q(df = 1) = 2.6810, p-val = 0.1016
##
## Model Results:
##
## estimate    se    zval    pval  ci.lb  ci.ub
## 0.7460 0.2377 3.1386 0.0017 0.2802 1.2119 **
##
## ---
## Signif. codes: 0 '***' 0.001 '**' 0.01 '*' 0.05 '.' 0.1 ' ' 1

```

## Any SUD - year

### Replicated Effect

#### Hours per day

##### Study 1

```

(vghrsday_anysudscreenyear_ds1 <- t.test(vghrsday ~ alcsudyear,
data=ds1anysudscreen))

##
## Welch Two Sample t-test
##
## data: vghrsday by alcsudyear
## t = 0.0080699, df = 27.265, p-value = 0.9936

```



```
## alternative hypothesis: true difference in means is not equal to 0
## 95 percent confidence interval:
## -0.7382208 0.7440532
## sample estimates:
## mean in group 0 mean in group 1
## 2.176829 2.173913
```

## Study 2

```
(vghrsday_anysudscreenyear_ds2 <- t.test(vghrsday ~ alcsudyear,
data=ds2anysudscreen))
```

```
##
## Welch Two Sample t-test
##
## data: vghrsday by alcsudyear
## t = 1.5875, df = 51.494, p-value = 0.1185
## alternative hypothesis: true difference in means is not equal to 0
## 95 percent confidence interval:
## -0.1744497 1.4942878
## sample estimates:
## mean in group 0 mean in group 1
## 3.659919 3.000000
```

## Hours per week

### Study 1

```
(vghrsweek_anysudscreenyear_ds1 <- t.test(vghrsweek ~ alcsudyear,
data=ds1anysudscreen))
```

```
##
## Welch Two Sample t-test
##
## data: vghrsweek by alcsudyear
## t = -0.51735, df = 27.504, p-value = 0.609
## alternative hypothesis: true difference in means is not equal to 0
## 95 percent confidence interval:
## -6.828211 4.076355
## sample estimates:
## mean in group 0 mean in group 1
## 11.84146 13.21739
```

### Study 2

```
(vghrsweek_anysudscreenyear_ds2 <- t.test(vghrsweek ~ alcsudyear,
data=ds2anysudscreen))
```

```
##  
## Welch Two Sample t-test  
##  
## data: vghrsweek by alcsudyear  
## t = 1.6334, df = 45.81, p-value = 0.1092  
## alternative hypothesis: true difference in means is not equal to 0  
## 95 percent confidence interval:  
## -1.126245 10.815314  
## sample estimates:  
## mean in group 0 mean in group 1  
## 19.04453 14.20000
```

## Days per week

### Study 1

```
(vgdaysweek_anysudscreenyear_ds1 <- t.test(vgdaysweek ~ alcsudyear,  
data=ds1anysudscreen))
```

```
##  
## Welch Two Sample t-test  
##  
## data: vgdaysweek by alcsudyear  
## t = -2.2487, df = 33.046, p-value = 0.03132  
## alternative hypothesis: true difference in means is not equal to 0  
## 95 percent confidence interval:  
## -1.73909379 -0.08699316  
## sample estimates:  
## mean in group 0 mean in group 1  
## 5.000000 5.913043
```

### Study 2

```
(vgdaysweek_anysudscreenyear_ds2 <- t.test(vgdaysweek ~ alcsudyear,  
data=ds2anysudscreen))
```

```
##  
## Welch Two Sample t-test  
##  
## data: vgdaysweek by alcsudyear  
## t = 0.4689, df = 28.688, p-value = 0.6427  
## alternative hypothesis: true difference in means is not equal to 0  
## 95 percent confidence interval:  
## -0.7566627 1.2065413  
## sample estimates:  
## mean in group 0 mean in group 1  
## 4.744939 4.520000
```

## MD

### Hours per day

#### *#Study 1*

```
anysudscreenyear_yes_ds1_vghrsday <- subset(anysudscreenyear_yes_ds1,
select = c(vghrsday)) #Subset 1i data
anysudscreenyear_vghrsday_m1i <-
apply(anysudscreenyear_yes_ds1_vghrsday, 2, mean) #Calculate m1i
anysudscreenyear_vghrsday_sd1i <-
apply(anysudscreenyear_yes_ds1_vghrsday, 2, sd) #Calculate sd1i
anysudscreenyear_vghrsday_n1i <- colSums(!
is.na(anysudscreenyear_yes_ds1_vghrsday)) #Calculate n1i
anysudscreenyear_no_ds1_vghrsday <- subset(anysudscreenyear_no_ds1,
select = c(vghrsday)) #Subset 2i data
anysudscreenyear_vghrsday_m2i <-
apply(anysudscreenyear_no_ds1_vghrsday, 2, mean) #Calculate m2i
anysudscreenyear_vghrsday_sd2i <-
apply(anysudscreenyear_no_ds1_vghrsday, 2, sd) #Calculate sd2i
anysudscreenyear_vghrsday_n2i <- colSums(!
is.na(anysudscreenyear_no_ds1_vghrsday)) #Calculate n2i
ds1anysudscreenyear_meta <- data.frame(m1i =
anysudscreenyear_vghrsday_m1i, sd1i = anysudscreenyear_vghrsday_sd1i,
n1i = anysudscreenyear_vghrsday_n1i, m2i =
anysudscreenyear_vghrsday_m2i, sd2i = anysudscreenyear_vghrsday_sd2i,
n2i = anysudscreenyear_vghrsday_n2i) #MA dataframe
ds1anysudscreenyear_meta <- escalc(measure="MD", m1i = m1i, sd1i =
sd1i, n1i = n1i, m2i = m2i, sd2i = sd2i, n2i = n2i,
data=ds1anysudscreenyear_meta) #Calculate yi and vi
```

#### *#Study 2*

```
anysudscreenyear_yes_ds2_vghrsday <- subset(anysudscreenyear_yes_ds2,
select = c(vghrsday)) #Subset 1i data
anysudscreenyear_vghrsday_m1i <-
apply(anysudscreenyear_yes_ds2_vghrsday, 2, mean) #Calculate m1i
anysudscreenyear_vghrsday_sd1i <-
apply(anysudscreenyear_yes_ds2_vghrsday, 2, sd) #Calculate sd1i
anysudscreenyear_vghrsday_n1i <- colSums(!
is.na(anysudscreenyear_yes_ds2_vghrsday)) #Calculate n1i
anysudscreenyear_no_ds2_vghrsday <- subset(anysudscreenyear_no_ds2,
select = c(vghrsday)) #Subset 2i data
anysudscreenyear_vghrsday_m2i <-
apply(anysudscreenyear_no_ds2_vghrsday, 2, mean) #Calculate m2i
anysudscreenyear_vghrsday_sd2i <-
apply(anysudscreenyear_no_ds2_vghrsday, 2, sd) #Calculate sd2i
anysudscreenyear_vghrsday_n2i <- colSums(!
is.na(anysudscreenyear_no_ds2_vghrsday)) #Calculate n2i
ds2anysudscreenyear_meta <- data.frame(m1i =
anysudscreenyear_vghrsday_m1i, sd1i = anysudscreenyear_vghrsday_sd1i,
n1i = anysudscreenyear_vghrsday_n1i, m2i =
```

```

anysudscreenyear_vghrsday_m2i, sd2i = anysudscreenyear_vghrsday_sd2i,
n2i = anysudscreenyear_vghrsday_n2i) #MA dataframe
ds2anysudscreenyear_meta <- escalc(measure="MD", m1i = m1i, sd1i =
sd1i, n1i = n1i, m2i = m2i, sd2i = sd2i, n2i = n2i,
data=ds2anysudscreenyear_meta) #Calculate yi and vi

```

*#FE meta-analysis*

```

(anysudscreenyear_meta <- rbind(ds1anysudscreenyear_meta,
ds2anysudscreenyear_meta))

```

```

##      m1i  sd1i n1i   m2i  sd2i n2i   yi   vi
## 1 2.173913 1.641844 23 2.176829 1.481733 164 -0.0029 0.1306
## 2 3.000000 1.707825 25 3.659919 3.723925 247 -0.6599 0.1728

```

```

(anysudscreenyear_vghrsday_meta <- rma(yi=yi, vi=vi, measure="MD",
method="FE", data=anysudscreenyear_meta))

```

```

##
## Fixed-Effects Model (k = 2)
##
## Test for Heterogeneity:
## Q(df = 1) = 1.4227, p-val = 0.2330
##
## Model Results:
##
## estimate      se    zval    pval  ci.lb  ci.ub
## -0.2857  0.2727 -1.0476  0.2948 -0.8202  0.2488
##
## ---
## Signif. codes:  0 '***' 0.001 '**' 0.01 '*' 0.05 '.' 0.1 ' ' 1

```

## Hours per week

*#Study 1*

```

anysudscreenyear_yes_ds1_vghrsweek <- subset(anysudscreenyear_yes_ds1,
select = c(vghrsweek)) #Subset 1i data
anysudscreenyear_vghrsweek_m1i <-
apply(anysudscreenyear_yes_ds1_vghrsweek, 2, mean) #Calculate m1i
anysudscreenyear_vghrsweek_sd1i <-
apply(anysudscreenyear_yes_ds1_vghrsweek, 2, sd) #Calculate sd1i
anysudscreenyear_vghrsweek_n1i <- colSums(!
is.na(anysudscreenyear_yes_ds1_vghrsweek)) #Calculate n1i
anysudscreenyear_no_ds1_vghrsweek <- subset(anysudscreenyear_no_ds1,
select = c(vghrsweek)) #Subset 2i data
anysudscreenyear_vghrsweek_m2i <-
apply(anysudscreenyear_no_ds1_vghrsweek, 2, mean) #Calculate m2i
anysudscreenyear_vghrsweek_sd2i <-
apply(anysudscreenyear_no_ds1_vghrsweek, 2, sd) #Calculate sd2i
anysudscreenyear_vghrsweek_n2i <- colSums(!
is.na(anysudscreenyear_no_ds1_vghrsweek)) #Calculate n2i

```

```

ds1anysudscreenyear_meta <- data.frame(m1i =
anysudscreenyear_vghrsweek_m1i, sd1i =
anysudscreenyear_vghrsweek_sd1i, n1i = anysudscreenyear_vghrsweek_n1i,
m2i = anysudscreenyear_vghrsweek_m2i, sd2i =
anysudscreenyear_vghrsweek_sd2i, n2i = anysudscreenyear_vghrsweek_n2i)
#MA dataframe
ds1anysudscreenyear_meta <- escalc(measure="MD", m1i = m1i, sd1i =
sd1i, n1i = n1i, m2i = m2i, sd2i = sd2i, n2i = n2i,
data=ds1anysudscreenyear_meta) #Calculate yi and vi

#Study 2
anysudscreenyear_yes_ds2_vghrsweek <- subset(anysudscreenyear_yes_ds2,
select = c(vghrsweek)) #Subset 1i data
anysudscreenyear_vghrsweek_m1i <-
apply(anysudscreenyear_yes_ds2_vghrsweek, 2, mean) #Calculate m1i
anysudscreenyear_vghrsweek_sd1i <-
apply(anysudscreenyear_yes_ds2_vghrsweek, 2, sd) #Calculate sd1i
anysudscreenyear_vghrsweek_n1i <- colSums(!
is.na(anysudscreenyear_yes_ds2_vghrsweek)) #Calculate n1i
anysudscreenyear_no_ds2_vghrsweek <- subset(anysudscreenyear_no_ds2,
select = c(vghrsweek)) #Subset 2i data
anysudscreenyear_vghrsweek_m2i <-
apply(anysudscreenyear_no_ds2_vghrsweek, 2, mean) #Calculate m2i
anysudscreenyear_vghrsweek_sd2i <-
apply(anysudscreenyear_no_ds2_vghrsweek, 2, sd) #Calculate sd2i
anysudscreenyear_vghrsweek_n2i <- colSums(!
is.na(anysudscreenyear_no_ds2_vghrsweek)) #Calculate n2i
ds2anysudscreenyear_meta <- data.frame(m1i =
anysudscreenyear_vghrsweek_m1i, sd1i =
anysudscreenyear_vghrsweek_sd1i, n1i = anysudscreenyear_vghrsweek_n1i,
m2i = anysudscreenyear_vghrsweek_m2i, sd2i =
anysudscreenyear_vghrsweek_sd2i, n2i = anysudscreenyear_vghrsweek_n2i)
#MA dataframe
ds2anysudscreenyear_meta <- escalc(measure="MD", m1i = m1i, sd1i =
sd1i, n1i = n1i, m2i = m2i, sd2i = sd2i, n2i = n2i,
data=ds2anysudscreenyear_meta) #Calculate yi and vi

#FE meta-analysis
(anysudscreenyear_meta <- rbind(ds1anysudscreenyear_meta,
ds2anysudscreenyear_meta))

##      m1i  sd1i n1i   m2i  sd2i n2i   yi   vi
## 1 13.21739 12.05652 23 11.84146 11.11454 164 1.3759 7.0732
## 2 14.20000 12.56981 25 19.04453 24.73375 247 -4.8445 8.7968

(anysudscreenyear_vghrsweek_meta <- rma(yi=yi, vi=vi, measure="MD",
method="FE", data=anysudscreenyear_meta))

##
## Fixed-Effects Model (k = 2)
##

```

```

## Test for Heterogeneity:
## Q(df = 1) = 2.4382, p-val = 0.1184
##
## Model Results:
##
## estimate      se      zval      pval      ci.lb      ci.ub
## -1.3965      1.9801     -0.7053     0.4806     -5.2774     2.4844
##
## ---
## Signif. codes:  0 '***' 0.001 '**' 0.01 '*' 0.05 '.' 0.1 ' ' 1

```

## Days per week

### #Study 1

```

anysudscreenyear_yes_ds1_vgdaysweek <-
subset(anysudscreenyear_yes_ds1, select = c(vgdaysweek)) #Subset 1i data
anysudscreenyear_vgdaysweek_m1i <-
apply(anysudscreenyear_yes_ds1_vgdaysweek, 2, mean) #Calculate m1i
anysudscreenyear_vgdaysweek_sd1i <-
apply(anysudscreenyear_yes_ds1_vgdaysweek, 2, sd) #Calculate sd1i
anysudscreenyear_vgdaysweek_n1i <- colSums(!
is.na(anysudscreenyear_yes_ds1_vgdaysweek)) #Calculate n1i
anysudscreenyear_no_ds1_vgdaysweek <- subset(anysudscreenyear_no_ds1,
select = c(vgdaysweek)) #Subset 2i data
anysudscreenyear_vgdaysweek_m2i <-
apply(anysudscreenyear_no_ds1_vgdaysweek, 2, mean) #Calculate m2i
anysudscreenyear_vgdaysweek_sd2i <-
apply(anysudscreenyear_no_ds1_vgdaysweek, 2, sd) #Calculate sd2i
anysudscreenyear_vgdaysweek_n2i <- colSums(!
is.na(anysudscreenyear_no_ds1_vgdaysweek)) #Calculate n2i
ds1anysudscreenyear_meta <- data.frame(m1i =
anysudscreenyear_vgdaysweek_m1i, sd1i =
anysudscreenyear_vgdaysweek_sd1i, n1i =
anysudscreenyear_vgdaysweek_n1i, m2i =
anysudscreenyear_vgdaysweek_m2i, sd2i =
anysudscreenyear_vgdaysweek_sd2i, n2i =
anysudscreenyear_vgdaysweek_n2i) #MA dataframe
ds1anysudscreenyear_meta <- escalc(measure="MD", m1i = m1i, sd1i =
sd1i, n1i = n1i, m2i = m2i, sd2i = sd2i, n2i = n2i,
data=ds1anysudscreenyear_meta) #Calculate yi and vi

```

### #Study 2

```

anysudscreenyear_yes_ds2_vgdaysweek <-
subset(anysudscreenyear_yes_ds2, select = c(vgdaysweek)) #Subset 1i data
anysudscreenyear_vgdaysweek_m1i <-
apply(anysudscreenyear_yes_ds2_vgdaysweek, 2, mean) #Calculate m1i
anysudscreenyear_vgdaysweek_sd1i <-
apply(anysudscreenyear_yes_ds2_vgdaysweek, 2, sd) #Calculate sd1i
anysudscreenyear_vgdaysweek_n1i <- colSums(!

```

```

is.na(anysudscreenyear_yes_ds2_vgdaysweek)) #Calculate n1i
anysudscreenyear_no_ds2_vgdaysweek <- subset(anysudscreenyear_no_ds2,
select = c(vgdaysweek)) #Subset 2i data
anysudscreenyear_vgdaysweek_m2i <-
apply(anysudscreenyear_no_ds2_vgdaysweek, 2, mean) #Calculate m2i
anysudscreenyear_vgdaysweek_sd2i <-
apply(anysudscreenyear_no_ds2_vgdaysweek, 2, sd) #Calculate sd2i
anysudscreenyear_vgdaysweek_n2i <- colSums(!
is.na(anysudscreenyear_no_ds2_vgdaysweek)) #Calculate n2i
ds2anysudscreenyear_meta <- data.frame(m1i =
anysudscreenyear_vgdaysweek_m1i, sd1i =
anysudscreenyear_vgdaysweek_sd1i, n1i =
anysudscreenyear_vgdaysweek_n1i, m2i =
anysudscreenyear_vgdaysweek_m2i, sd2i =
anysudscreenyear_vgdaysweek_sd2i, n2i =
anysudscreenyear_vgdaysweek_n2i) #MA dataframe
ds2anysudscreenyear_meta <- escalc(measure="MD", m1i = m1i, sd1i =
sd1i, n1i = n1i, m2i = m2i, sd2i = sd2i, n2i = n2i,
data=ds2anysudscreenyear_meta) #Calculate yi and vi

#FE meta-analysis
(anysudscreenyear_meta <- rbind(ds1anysudscreenyear_meta,
ds2anysudscreenyear_meta))

##      m1i  sd1i n1i  m2i  sd2i n2i  yi  vi
## 1 5.913043 1.755848 23 5.000000 2.248380 164 0.9130 0.1649
## 2 4.520000 2.293469 25 4.744939 2.207647 247 -0.2249 0.2301

(anysudscreenyear_vgdaysweek_meta <- rma(yi=yi, vi=vi, measure="MD",
method="FE", data=anysudscreenyear_meta))

##
## Fixed-Effects Model (k = 2)
##
## Test for Heterogeneity:
## Q(df = 1) = 3.2785, p-val = 0.0702
##
## Model Results:
##
## estimate    se    zval    pval  ci.lb  ci.ub
## 0.4381 0.3099 1.4134 0.1575 -0.1694 1.0455
##
## ---
## Signif. codes:  0 '***' 0.001 '**' 0.01 '*' 0.05 '.' 0.1 ' ' 1

```

## Any SUD - month

### Replicated Effect

#### Hours per day

##### Study 1 - CANNOT CALCULATE

##### Study 2

```
(vghrsday_anysudscreenmonth_ds2 <- t.test(vghrsday ~ alcsudmonth,  
data=ds2anysudscreen))
```

```
##  
## Welch Two Sample t-test  
##  
## data: vghrsday by alcsudmonth  
## t = 0.73757, df = 7.7998, p-value = 0.4824  
## alternative hypothesis: true difference in means is not equal to 0  
## 95 percent confidence interval:  
## -1.002759 1.939686  
## sample estimates:  
## mean in group 0 mean in group 1  
## 3.611321 3.142857
```

#### Hours per week

##### Study 1 - CANNOT CALCULATE

##### Study 2

```
(vghrsweek_anysudscreenmonth_ds2 <- t.test(vghrsweek ~ alcsudmonth,  
data=ds2anysudscreen))
```

```
##  
## Welch Two Sample t-test  
##  
## data: vghrsweek by alcsudmonth  
## t = 0.44469, df = 7.4127, p-value = 0.6692  
## alternative hypothesis: true difference in means is not equal to 0  
## 95 percent confidence interval:  
## -8.862791 13.025594  
## sample estimates:  
## mean in group 0 mean in group 1  
## 18.65283 16.57143
```



## Days per week

### Study 1 - CANNOT CALCULATE

#### Study 2

```
(vgdaysweek_anysudscreenmonth_ds2 <- t.test(vgdaysweek ~ alcsudmonth,  
data=ds2anysudscreen))
```

```
##  
## Welch Two Sample t-test  
##  
## data: vgdaysweek by alcsudmonth  
## t = -0.35443, df = 6.3654, p-value = 0.7345  
## alternative hypothesis: true difference in means is not equal to 0  
## 95 percent confidence interval:  
## -2.210045 1.644007  
## sample estimates:  
## mean in group 0 mean in group 1  
## 4.716981 5.000000
```

## MD

### Hours per day

#### #Study 1

```
anysudscreenmonth_yes_ds1_vghrsday <-  
subset(anysudscreenmonth_yes_ds1, select = c(vghrsday)) #Subset 1i data  
anysudscreenmonth_vghrsday_m1i <-  
apply(anysudscreenmonth_yes_ds1_vghrsday, 2, mean) #Calculate m1i  
anysudscreenmonth_vghrsday_sd1i <-  
apply(anysudscreenmonth_yes_ds1_vghrsday, 2, sd) #Calculate sd1i  
anysudscreenmonth_vghrsday_n1i <- colSums(!  
is.na(anysudscreenmonth_yes_ds1_vghrsday)) #Calculate n1i  
anysudscreenmonth_no_ds1_vghrsday <-  
subset(anysudscreenmonth_no_ds1, select = c(vghrsday)) #Subset 2i data  
anysudscreenmonth_vghrsday_m2i <-  
apply(anysudscreenmonth_no_ds1_vghrsday, 2, mean) #Calculate m2i  
anysudscreenmonth_vghrsday_sd2i <-  
apply(anysudscreenmonth_no_ds1_vghrsday, 2, sd) #Calculate sd2i  
anysudscreenmonth_vghrsday_n2i <- colSums(!  
is.na(anysudscreenmonth_no_ds1_vghrsday)) #Calculate n2i  
ds1anysudscreenmonth_meta <- data.frame(m1i =  
anysudscreenmonth_vghrsday_m1i, sd1i =  
anysudscreenmonth_vghrsday_sd1i, n1i = anysudscreenmonth_vghrsday_n1i,  
m2i = anysudscreenmonth_vghrsday_m2i, sd2i =  
anysudscreenmonth_vghrsday_sd2i, n2i =  
anysudscreenmonth_vghrsday_n2i) #MA dataframe  
ds1anysudscreenmonth_meta <- escalc(measure="MD", m1i = m1i, sd1i =  
sd1i, n1i = n1i, m2i = m2i, sd2i = sd2i, n2i = n2i,
```

```
data=ds1anysudscreenmonth_meta) #Calculate yi and vi
```

### #Study 2

```
anysudscreenmonth_yes_ds2_vghrsday <-  
subset(anysudscreenmonth_yes_ds2, select = c(vghrsday)) #Subset 1i data  
anysudscreenmonth_vghrsday_m1i <-  
apply(anysudscreenmonth_yes_ds2_vghrsday, 2, mean) #Calculate m1i  
anysudscreenmonth_vghrsday_sd1i <-  
apply(anysudscreenmonth_yes_ds2_vghrsday, 2, sd) #Calculate sd1i  
anysudscreenmonth_vghrsday_n1i <- colSums(!  
is.na(anysudscreenmonth_yes_ds2_vghrsday)) #Calculate n1i  
anysudscreenmonth_no_ds2_vghrsday <-  
subset(anysudscreenmonth_no_ds2, select = c(vghrsday)) #Subset 2i data  
anysudscreenmonth_vghrsday_m2i <-  
apply(anysudscreenmonth_no_ds2_vghrsday, 2, mean) #Calculate m2i  
anysudscreenmonth_vghrsday_sd2i <-  
apply(anysudscreenmonth_no_ds2_vghrsday, 2, sd) #Calculate sd2i  
anysudscreenmonth_vghrsday_n2i <- colSums(!  
is.na(anysudscreenmonth_no_ds2_vghrsday)) #Calculate n2i  
ds2anysudscreenmonth_meta <- data.frame(m1i =  
anysudscreenmonth_vghrsday_m1i, sd1i =  
anysudscreenmonth_vghrsday_sd1i, n1i = anysudscreenmonth_vghrsday_n1i,  
m2i = anysudscreenmonth_vghrsday_m2i, sd2i =  
anysudscreenmonth_vghrsday_sd2i, n2i =  
anysudscreenmonth_vghrsday_n2i) #MA dataframe  
ds2anysudscreenmonth_meta <- escalc(measure="MD", m1i = m1i, sd1i =  
sd1i, n1i = n1i, m2i = m2i, sd2i = sd2i, n2i = n2i,  
data=ds2anysudscreenmonth_meta) #Calculate yi and vi
```

### #FE meta-analysis

```
(anysudscreenmonth_meta <- rbind(ds1anysudscreenmonth_meta,  
ds2anysudscreenmonth_meta))
```

```
##      m1i  sd1i n1i  m2i  sd2i n2i  yi  vi  
## 1   NaN   NA  0 2.176471 1.497626 187  NA  NA  
## 2 3.142857 1.573592 7 3.611321 3.628050 265 -0.4685 0.4034
```

```
(anysudscreenmonth_vghrsday_meta <- rma(yi=yi, vi=vi, measure="MD",  
method="FE", data=anysudscreenmonth_meta))
```

```
##
```

```
## Fixed-Effects Model (k = 1)
```

```
##
```

```
## Test for Heterogeneity:
```

```
## Q(df = 0) = 0.0000, p-val = 1.0000
```

```
##
```

```
## Model Results:
```

```
##
```

```
## estimate    se    zval    pval    ci.lb    ci.ub  
## -0.4685  0.6351 -0.7376  0.4608 -1.7133  0.7764
```

```
##
```

```
## ---  
## Signif. codes: 0 '***' 0.001 '**' 0.01 '*' 0.05 '.' 0.1 ' ' 1
```

## Hours per week

### #Study 1

```
anysudscreenmonth_yes_ds1_vghrsweek <-  
subset(anysudscreenmonth_yes_ds1, select = c(vghrsweek)) #Subset 1i data  
anysudscreenmonth_vghrsweek_m1i <-  
apply(anysudscreenmonth_yes_ds1_vghrsweek, 2, mean) #Calculate m1i  
anysudscreenmonth_vghrsweek_sd1i <-  
apply(anysudscreenmonth_yes_ds1_vghrsweek, 2, sd) #Calculate sd1i  
anysudscreenmonth_vghrsweek_n1i <- colSums(!  
is.na(anysudscreenmonth_yes_ds1_vghrsweek)) #Calculate n1i  
anysudscreenmonth_no_ds1_vghrsweek <-  
subset(anysudscreenmonth_no_ds1, select = c(vghrsweek)) #Subset 2i data  
anysudscreenmonth_vghrsweek_m2i <-  
apply(anysudscreenmonth_no_ds1_vghrsweek, 2, mean) #Calculate m2i  
anysudscreenmonth_vghrsweek_sd2i <-  
apply(anysudscreenmonth_no_ds1_vghrsweek, 2, sd) #Calculate sd2i  
anysudscreenmonth_vghrsweek_n2i <- colSums(!  
is.na(anysudscreenmonth_no_ds1_vghrsweek)) #Calculate n2i  
ds1anysudscreenmonth_meta <- data.frame(m1i =  
anysudscreenmonth_vghrsweek_m1i, sd1i =  
anysudscreenmonth_vghrsweek_sd1i, n1i =  
anysudscreenmonth_vghrsweek_n1i, m2i =  
anysudscreenmonth_vghrsweek_m2i, sd2i =  
anysudscreenmonth_vghrsweek_sd2i, n2i =  
anysudscreenmonth_vghrsweek_n2i) #MA dataframe  
ds1anysudscreenmonth_meta <- escalc(measure="MD", m1i = m1i, sd1i =  
sd1i, n1i = n1i, m2i = m2i, sd2i = sd2i, n2i = n2i,  
data=ds1anysudscreenmonth_meta) #Calculate yi and vi
```

### #Study 2

```
anysudscreenmonth_yes_ds2_vghrsweek <-  
subset(anysudscreenmonth_yes_ds2, select = c(vghrsweek)) #Subset 1i data  
anysudscreenmonth_vghrsweek_m1i <-  
apply(anysudscreenmonth_yes_ds2_vghrsweek, 2, mean) #Calculate m1i  
anysudscreenmonth_vghrsweek_sd1i <-  
apply(anysudscreenmonth_yes_ds2_vghrsweek, 2, sd) #Calculate sd1i  
anysudscreenmonth_vghrsweek_n1i <- colSums(!  
is.na(anysudscreenmonth_yes_ds2_vghrsweek)) #Calculate n1i  
anysudscreenmonth_no_ds2_vghrsweek <-  
subset(anysudscreenmonth_no_ds2, select = c(vghrsweek)) #Subset 2i data  
anysudscreenmonth_vghrsweek_m2i <-  
apply(anysudscreenmonth_no_ds2_vghrsweek, 2, mean) #Calculate m2i  
anysudscreenmonth_vghrsweek_sd2i <-  
apply(anysudscreenmonth_no_ds2_vghrsweek, 2, sd) #Calculate sd2i  
anysudscreenmonth_vghrsweek_n2i <- colSums(!
```

```

is.na(anysudscreenmonth_no_ds2_vghrsweek)) #Calculate n2i
ds2anysudscreenmonth_meta <- data.frame(m1i =
anysudscreenmonth_vghrsweek_m1i, sd1i =
anysudscreenmonth_vghrsweek_sd1i, n1i =
anysudscreenmonth_vghrsweek_n1i, m2i =
anysudscreenmonth_vghrsweek_m2i, sd2i =
anysudscreenmonth_vghrsweek_sd2i, n2i =
anysudscreenmonth_vghrsweek_n2i) #MA dataframe
ds2anysudscreenmonth_meta <- escalc(measure="MD", m1i = m1i, sd1i =
sd1i, n1i = n1i, m2i = m2i, sd2i = sd2i, n2i = n2i,
data=ds2anysudscreenmonth_meta) #Calculate yi and vi

```

### #FE meta-analysis

```

(anysudscreenmonth_meta <- rbind(ds1anysudscreenmonth_meta,
ds2anysudscreenmonth_meta))

```

```

##      m1i  sd1i n1i  m2i  sd2i n2i  yi  vi
## 1   NaN   NA  0 12.01070 11.20963 187   NA   NA
## 2 16.57143 11.74531 7 18.65283 24.14916 265 -2.0814 21.9082

```

```

(anysudscreenmonth_vghrsweek_meta <- rma(yi=yi, vi=vi, measure="MD",
method="FE", data=anysudscreenmonth_meta))

```

```

##
## Fixed-Effects Model (k = 1)
##
## Test for Heterogeneity:
## Q(df = 0) = 0.0000, p-val = 1.0000
##
## Model Results:
##
## estimate      se      zval      pval      ci.lb      ci.ub
## -2.0814      4.6806     -0.4447     0.6565    -11.2552     7.0924
##
## ---
## Signif. codes:  0 '***' 0.001 '**' 0.01 '*' 0.05 '.' 0.1 ' ' 1

```

## Days per week

### #Study 1

```

anysudscreenmonth_yes_ds1_vgdaysweek <-
subset(anysudscreenmonth_yes_ds1, select = c(vgdaysweek)) #Subset 1i
data
anysudscreenmonth_vgdaysweek_m1i <-
apply(anysudscreenmonth_yes_ds1_vgdaysweek, 2, mean) #Calculate m1i
anysudscreenmonth_vgdaysweek_sd1i <-
apply(anysudscreenmonth_yes_ds1_vgdaysweek, 2, sd) #Calculate sd1i
anysudscreenmonth_vgdaysweek_n1i <- colSums(!
is.na(anysudscreenmonth_yes_ds1_vgdaysweek)) #Calculate n1i
anysudscreenmonth_no_ds1_vgdaysweek <-

```

```

subset(anysudscreenmonth_no_ds1, select = c(vgdaysweek)) #Subset 2i
data
anysudscreenmonth_vgdaysweek_m2i <-
apply(anysudscreenmonth_no_ds1_vgdaysweek, 2, mean) #Calculate m2i
anysudscreenmonth_vgdaysweek_sd2i <-
apply(anysudscreenmonth_no_ds1_vgdaysweek, 2, sd) #Calculate sd2i
anysudscreenmonth_vgdaysweek_n2i <- colSums(!
is.na(anysudscreenmonth_no_ds1_vgdaysweek)) #Calculate n2i
ds1anysudscreenmonth_meta <- data.frame(m1i =
anysudscreenmonth_vgdaysweek_m1i, sd1i =
anysudscreenmonth_vgdaysweek_sd1i, n1i =
anysudscreenmonth_vgdaysweek_n1i, m2i =
anysudscreenmonth_vgdaysweek_m2i, sd2i =
anysudscreenmonth_vgdaysweek_sd2i, n2i =
anysudscreenmonth_vgdaysweek_n2i) #MA dataframe
ds1anysudscreenmonth_meta <- escalc(measure="MD", m1i = m1i, sd1i =
sd1i, n1i = n1i, m2i = m2i, sd2i = sd2i, n2i = n2i,
data=ds1anysudscreenmonth_meta) #Calculate yi and vi

```

### *#Study 2*

```

anysudscreenmonth_yes_ds2_vgdaysweek <-
subset(anysudscreenmonth_yes_ds2, select = c(vgdaysweek)) #Subset 1i
data
anysudscreenmonth_vgdaysweek_m1i <-
apply(anysudscreenmonth_yes_ds2_vgdaysweek, 2, mean) #Calculate m1i
anysudscreenmonth_vgdaysweek_sd1i <-
apply(anysudscreenmonth_yes_ds2_vgdaysweek, 2, sd) #Calculate sd1i
anysudscreenmonth_vgdaysweek_n1i <- colSums(!
is.na(anysudscreenmonth_yes_ds2_vgdaysweek)) #Calculate n1i
anysudscreenmonth_no_ds2_vgdaysweek <-
subset(anysudscreenmonth_no_ds2, select = c(vgdaysweek)) #Subset 2i
data
anysudscreenmonth_vgdaysweek_m2i <-
apply(anysudscreenmonth_no_ds2_vgdaysweek, 2, mean) #Calculate m2i
anysudscreenmonth_vgdaysweek_sd2i <-
apply(anysudscreenmonth_no_ds2_vgdaysweek, 2, sd) #Calculate sd2i
anysudscreenmonth_vgdaysweek_n2i <- colSums(!
is.na(anysudscreenmonth_no_ds2_vgdaysweek)) #Calculate n2i
ds2anysudscreenmonth_meta <- data.frame(m1i =
anysudscreenmonth_vgdaysweek_m1i, sd1i =
anysudscreenmonth_vgdaysweek_sd1i, n1i =
anysudscreenmonth_vgdaysweek_n1i, m2i =
anysudscreenmonth_vgdaysweek_m2i, sd2i =
anysudscreenmonth_vgdaysweek_sd2i, n2i =
anysudscreenmonth_vgdaysweek_n2i) #MA dataframe
ds2anysudscreenmonth_meta <- escalc(measure="MD", m1i = m1i, sd1i =
sd1i, n1i = n1i, m2i = m2i, sd2i = sd2i, n2i = n2i,
data=ds2anysudscreenmonth_meta) #Calculate yi and vi

```

### *#FE meta-analysis*

```

(anysudscreenmonth_meta <- rbind(ds1anysudscreenmonth_meta,
ds2anysudscreenmonth_meta))

## mli sdlnli m2i sd2in2i yi vi
## 1 NaN NA 0 5.112299 2.210242 187 NA NA
## 2 5 2.081666 7 4.716981 2.218870 265 0.2830 0.6376

(anysudscreenmonth_vgdaysweek_meta <- rma(yi=yi, vi=vi, measure="MD",
method="FE", data=anysudscreenmonth_meta))

##
## Fixed-Effects Model (k = 1)
##
## Test for Heterogeneity:
## Q(df = 0) = 0.0000, p-val = 1.0000
##
## Model Results:
##
## estimate se zval pval ci.lb ci.ub
## 0.2830 0.7985 0.3544 0.7230 -1.2820 1.8481
##
## ---
## Signif. codes: 0 '***' 0.001 '**' 0.01 '*' 0.05 '.' 0.1 ' ' 1

```

## AUD - discharge

### Replicated Effect

#### Hours per day

##### Study 1

```
(vghrsday_auditdis_ds1 <- t.test(vghrsday ~ alcsuddis, data=ds1audit))
```

```

##
## Welch Two Sample t-test
##
## data: vghrsday by alcsuddis
## t = -1.8775, df = 35.221, p-value = 0.06875
## alternative hypothesis: true difference in means is not equal to 0
## 95 percent confidence interval:
## -1.58705733 0.06178851
## sample estimates:
## mean in group 0 mean in group 1
## 2.108333 2.870968

```

## Study 2

```
(vghrsday_auditdis_ds2 <- t.test(vghrsday ~ alcsuddis, data=ds2audit))
```

```
##  
## Welch Two Sample t-test  
##  
## data: vghrsday by alcsuddis  
## t = 0.2508, df = 37.667, p-value = 0.8033  
## alternative hypothesis: true difference in means is not equal to 0  
## 95 percent confidence interval:  
## -0.7891072 1.0122085  
## sample estimates:  
## mean in group 0 mean in group 1  
## 3.424051 3.312500
```

## Hours per week

### Study 1

```
(vghrsweek_auditdis_ds1 <- t.test(vghrsweek ~ alcsuddis, data=ds1audit))
```

```
##  
## Welch Two Sample t-test  
##  
## data: vghrsweek by alcsuddis  
## t = -2.5308, df = 36.104, p-value = 0.01588  
## alternative hypothesis: true difference in means is not equal to 0  
## 95 percent confidence interval:  
## -13.290758 -1.466231  
## sample estimates:  
## mean in group 0 mean in group 1  
## 11.26667 18.64516
```

### Study 2

```
(vghrsweek_auditdis_ds2 <- t.test(vghrsweek ~ alcsuddis, data=ds2audit))
```

```
##  
## Welch Two Sample t-test  
##  
## data: vghrsweek by alcsuddis  
## t = 0.20146, df = 33.112, p-value = 0.8416  
## alternative hypothesis: true difference in means is not equal to 0  
## 95 percent confidence interval:  
## -5.822658 7.102721  
## sample estimates:  
## mean in group 0 mean in group 1  
## 17.70253 17.06250
```

## Days per week

### Study 1

```
(vgdaysweek_auditdis_ds1 <- t.test(vgdaysweek ~ alcsuddis,  
data=ds1audit))
```

```
##  
## Welch Two Sample t-test  
##  
## data: vgdaysweek by alcsuddis  
## t = -3.4954, df = 61.123, p-value = 0.0008875  
## alternative hypothesis: true difference in means is not equal to 0  
## 95 percent confidence interval:  
## -1.992539 -0.542407  
## sample estimates:  
## mean in group 0 mean in group 1  
## 4.958333 6.225806
```

### Study 2

```
(vgdaysweek_auditdis_ds2 <- t.test(vgdaysweek ~ alcsuddis,  
data=ds2audit))
```

```
##  
## Welch Two Sample t-test  
##  
## data: vgdaysweek by alcsuddis  
## t = -0.57634, df = 19.599, p-value = 0.5709  
## alternative hypothesis: true difference in means is not equal to 0  
## 95 percent confidence interval:  
## -1.3133202 0.7452823  
## sample estimates:  
## mean in group 0 mean in group 1  
## 4.778481 5.062500
```

## MD

### Hours per day

```
#Study 1  
auditdis_yes_ds1_vghrsday <- subset(auditdis_yes_ds1, select = c(vghrsday))  
#Subset 1i data  
auditdis_vghrsday_m1i <- apply(auditdis_yes_ds1_vghrsday, 2, mean)  
#Calculate m1i  
auditdis_vghrsday_sd1i <- apply(auditdis_yes_ds1_vghrsday, 2, sd)  
#Calculate sd1i
```



```

auditdis_vghrsday_n1i <- colSums(!is.na(auditdis_yes_ds1_vghrsday))
#Calculate n1i
auditdis_no_ds1_vghrsday <- subset(auditdis_no_ds1, select = c(vghrsday))
#Subset 2i data
auditdis_vghrsday_m2i <- apply(auditdis_no_ds1_vghrsday, 2, mean)
#Calculate m2i
auditdis_vghrsday_sd2i <- apply(auditdis_no_ds1_vghrsday, 2, sd) #Calculate
sd2i
auditdis_vghrsday_n2i <- colSums(!is.na(auditdis_no_ds1_vghrsday))
#Calculate n2i
ds1auditdis_meta <- data.frame(m1i = auditdis_vghrsday_m1i, sd1i =
auditdis_vghrsday_sd1i, n1i = auditdis_vghrsday_n1i, m2i =
auditdis_vghrsday_m2i, sd2i = auditdis_vghrsday_sd2i, n2i =
auditdis_vghrsday_n2i) #MA dataframe
ds1auditdis_meta <- escalc(measure="MD", m1i = m1i, sd1i = sd1i, n1i =
n1i, m2i = m2i, sd2i = sd2i, n2i = n2i, data=ds1auditdis_meta) #Calculate yi
and vi

#Study 2
auditdis_yes_ds2_vghrsday <- subset(auditdis_yes_ds2, select = c(vghrsday))
#Subset 1i data
auditdis_vghrsday_m1i <- apply(auditdis_yes_ds2_vghrsday, 2, mean)
#Calculate m1i
auditdis_vghrsday_sd1i <- apply(auditdis_yes_ds2_vghrsday, 2, sd)
#Calculate sd1i
auditdis_vghrsday_n1i <- colSums(!is.na(auditdis_yes_ds2_vghrsday))
#Calculate n1i
auditdis_no_ds2_vghrsday <- subset(auditdis_no_ds2, select = c(vghrsday))
#Subset 2i data
auditdis_vghrsday_m2i <- apply(auditdis_no_ds2_vghrsday, 2, mean)
#Calculate m2i
auditdis_vghrsday_sd2i <- apply(auditdis_no_ds2_vghrsday, 2, sd) #Calculate
sd2i
auditdis_vghrsday_n2i <- colSums(!is.na(auditdis_no_ds2_vghrsday))
#Calculate n2i
ds2auditdis_meta <- data.frame(m1i = auditdis_vghrsday_m1i, sd1i =
auditdis_vghrsday_sd1i, n1i = auditdis_vghrsday_n1i, m2i =
auditdis_vghrsday_m2i, sd2i = auditdis_vghrsday_sd2i, n2i =
auditdis_vghrsday_n2i) #MA dataframe
ds2auditdis_meta <- escalc(measure="MD", m1i = m1i, sd1i = sd1i, n1i =
n1i, m2i = m2i, sd2i = sd2i, n2i = n2i, data=ds2auditdis_meta) #Calculate yi
and vi

#FE meta-analysis
(auditdis_meta <- rbind(ds1auditdis_meta, ds2auditdis_meta))

##      m1i  sd1i n1i   m2i  sd2i n2i   yi   vi
## 1 2.870968 2.171665 31 2.108333 1.24209 120 0.7626 0.1650
## 2 3.312500 1.400893 16 3.424051 3.44621 158 -0.1116 0.1978

```

```
(auditdis_vghrsday_meta <- rma(yi=yi, vi=vi, measure="MD", method="FE",  
data=auditdis_meta))
```

```
##  
## Fixed-Effects Model (k = 2)  
##  
## Test for Heterogeneity:  
## Q(df = 1) = 2.1063, p-val = 0.1467  
##  
## Model Results:  
##  
## estimate    se    zval    pval    ci.lb    ci.ub  
## 0.3651 0.2999 1.2173 0.2235 -0.2228 0.9530  
##  
## ---  
## Signif. codes:  0 '***' 0.001 '**' 0.01 '*' 0.05 '.' 0.1 ' ' 1
```

## Hours per week

### *#Study 1*

```
auditdis_yes_ds1_vghrsweek <- subset(auditdis_yes_ds1, select =  
c(vghrsweek)) #Subset 1i data  
auditdis_vghrsweek_m1i <- apply(auditdis_yes_ds1_vghrsweek, 2, mean)  
#Calculate m1i  
auditdis_vghrsweek_sd1i <- apply(auditdis_yes_ds1_vghrsweek, 2, sd)  
#Calculate sd1i  
auditdis_vghrsweek_n1i <- colSums(!is.na(auditdis_yes_ds1_vghrsweek))  
#Calculate n1i  
auditdis_no_ds1_vghrsweek <- subset(auditdis_no_ds1, select =  
c(vghrsweek)) #Subset 2i data  
auditdis_vghrsweek_m2i <- apply(auditdis_no_ds1_vghrsweek, 2, mean)  
#Calculate m2i  
auditdis_vghrsweek_sd2i <- apply(auditdis_no_ds1_vghrsweek, 2, sd)  
#Calculate sd2i  
auditdis_vghrsweek_n2i <- colSums(!is.na(auditdis_no_ds1_vghrsweek))  
#Calculate n2i  
ds1auditdis_meta <- data.frame(m1i = auditdis_vghrsweek_m1i, sd1i =  
auditdis_vghrsweek_sd1i, n1i = auditdis_vghrsweek_n1i, m2i =  
auditdis_vghrsweek_m2i, sd2i = auditdis_vghrsweek_sd2i, n2i =  
auditdis_vghrsweek_n2i) #MA dataframe  
ds1auditdis_meta <- escalc(measure="MD", m1i = m1i, sd1i = sd1i, n1i =  
n1i, m2i = m2i, sd2i = sd2i, n2i = n2i, data=ds1auditdis_meta) #Calculate yi  
and vi
```

### *#Study 2*

```
auditdis_yes_ds2_vghrsweek <- subset(auditdis_yes_ds2, select =  
c(vghrsweek)) #Subset 1i data  
auditdis_vghrsweek_m1i <- apply(auditdis_yes_ds2_vghrsweek, 2, mean)  
#Calculate m1i
```

```

auditdis_vghrsweek_sd1i <- apply(auditdis_yes_ds2_vghrsweek, 2, sd)
#Calculate sd1i
auditdis_vghrsweek_n1i <- colSums(!is.na(auditdis_yes_ds2_vghrsweek))
#Calculate n1i
auditdis_no_ds2_vghrsweek <- subset(auditdis_no_ds2, select =
c(vghrsweek)) #Subset 2i data
auditdis_vghrsweek_m2i <- apply(auditdis_no_ds2_vghrsweek, 2, mean)
#Calculate m2i
auditdis_vghrsweek_sd2i <- apply(auditdis_no_ds2_vghrsweek, 2, sd)
#Calculate sd2i
auditdis_vghrsweek_n2i <- colSums(!is.na(auditdis_no_ds2_vghrsweek))
#Calculate n2i
ds2auditdis_meta <- data.frame(m1i = auditdis_vghrsweek_m1i, sd1i =
auditdis_vghrsweek_sd1i, n1i = auditdis_vghrsweek_n1i, m2i =
auditdis_vghrsweek_m2i, sd2i = auditdis_vghrsweek_sd2i, n2i =
auditdis_vghrsweek_n2i) #MA dataframe
ds2auditdis_meta <- escalc(measure="MD", m1i = m1i, sd1i = sd1i, n1i =
n1i, m2i = m2i, sd2i = sd2i, n2i = n2i, data=ds2auditdis_meta) #Calculate yi
and vi

#FE meta-analysis
(auditdis_meta <- rbind(ds1auditdis_meta, ds2auditdis_meta))

##      m1i  sd1i n1i   m2i  sd2i n2i   yi   vi
## 1 18.64516 15.48881 31 11.26667 9.557199 120 7.3785 8.5000
## 2 17.06250 10.36320 16 17.70253 23.111612 158 -0.6400 10.0929

(auditdis_vghrsweek_meta <- rma(yi=yi, vi=vi, measure="MD",
method="FE", data=auditdis_meta))

##
## Fixed-Effects Model (k = 2)
##
## Test for Heterogeneity:
## Q(df = 1) = 3.4581, p-val = 0.0629
##
## Model Results:
##
## estimate      se    zval    pval  ci.lb  ci.ub
## 3.7127  2.1480  1.7284  0.0839 -0.4974  7.9228
##
## ---
## Signif. codes:  0 '***' 0.001 '**' 0.01 '*' 0.05 '.' 0.1 ' ' 1

```

## Days per week

```

#Study 1
auditdis_yes_ds1_vgdaysweek <- subset(auditdis_yes_ds1, select =
c(vgdaysweek)) #Subset 1i data
auditdis_vgdaysweek_m1i <- apply(auditdis_yes_ds1_vgdaysweek, 2, mean)

```

```

#Calculate m1i
auditdis_vgdaysweek_sd1i <- apply(auditdis_yes_ds1_vgdaysweek, 2, sd)
#Calculate sd1i
auditdis_vgdaysweek_n1i <- colSums(!is.na(auditdis_yes_ds1_vgdaysweek))
#Calculate n1i
auditdis_no_ds1_vgdaysweek <- subset(auditdis_no_ds1, select =
c(vgdaysweek)) #Subset 2i data
auditdis_vgdaysweek_m2i <- apply(auditdis_no_ds1_vgdaysweek, 2, mean)
#Calculate m2i
auditdis_vgdaysweek_sd2i <- apply(auditdis_no_ds1_vgdaysweek, 2, sd)
#Calculate sd2i
auditdis_vgdaysweek_n2i <- colSums(!is.na(auditdis_no_ds1_vgdaysweek))
#Calculate n2i
ds1auditdis_meta <- data.frame(m1i = auditdis_vgdaysweek_m1i, sd1i =
auditdis_vgdaysweek_sd1i, n1i = auditdis_vgdaysweek_n1i, m2i =
auditdis_vgdaysweek_m2i, sd2i = auditdis_vgdaysweek_sd2i, n2i =
auditdis_vgdaysweek_n2i) #MA dataframe
ds1auditdis_meta <- escalc(measure="MD", m1i = m1i, sd1i = sd1i, n1i =
n1i, m2i = m2i, sd2i = sd2i, n2i = n2i, data=ds1auditdis_meta) #Calculate yi
and vi

```

#### #Study 2

```

auditdis_yes_ds2_vgdaysweek <- subset(auditdis_yes_ds2, select =
c(vgdaysweek)) #Subset 1i data
auditdis_vgdaysweek_m1i <- apply(auditdis_yes_ds2_vgdaysweek, 2, mean)
#Calculate m1i
auditdis_vgdaysweek_sd1i <- apply(auditdis_yes_ds2_vgdaysweek, 2, sd)
#Calculate sd1i
auditdis_vgdaysweek_n1i <- colSums(!is.na(auditdis_yes_ds2_vgdaysweek))
#Calculate n1i
auditdis_no_ds2_vgdaysweek <- subset(auditdis_no_ds2, select =
c(vgdaysweek)) #Subset 2i data
auditdis_vgdaysweek_m2i <- apply(auditdis_no_ds2_vgdaysweek, 2, mean)
#Calculate m2i
auditdis_vgdaysweek_sd2i <- apply(auditdis_no_ds2_vgdaysweek, 2, sd)
#Calculate sd2i
auditdis_vgdaysweek_n2i <- colSums(!is.na(auditdis_no_ds2_vgdaysweek))
#Calculate n2i
ds2auditdis_meta <- data.frame(m1i = auditdis_vgdaysweek_m1i, sd1i =
auditdis_vgdaysweek_sd1i, n1i = auditdis_vgdaysweek_n1i, m2i =
auditdis_vgdaysweek_m2i, sd2i = auditdis_vgdaysweek_sd2i, n2i =
auditdis_vgdaysweek_n2i) #MA dataframe
ds2auditdis_meta <- escalc(measure="MD", m1i = m1i, sd1i = sd1i, n1i =
n1i, m2i = m2i, sd2i = sd2i, n2i = n2i, data=ds2auditdis_meta) #Calculate yi
and vi

```

#### #FE meta-analysis

```

(auditdis_meta <- rbind(ds1auditdis_meta, ds2auditdis_meta))

```

```

##      m1i  sd1i n1i  m2i  sd2i n2i  yi  vi
## 1 6.225806 1.667527 31 4.958333 2.239432 120 1.2675 0.1315
## 2 5.062500 1.842779 16 4.778481 2.199083 158 0.2840 0.2428

(auditdis_vgdaysweek_meta <- rma(yi=yi, vi=vi, measure="MD",
method="FE", data=auditdis_meta))

##
## Fixed-Effects Model (k = 2)
##
## Test for Heterogeneity:
## Q(df = 1) = 2.5837, p-val = 0.1080
##
## Model Results:
##
## estimate      se    zval    pval  ci.lb  ci.ub
## 0.9220 0.2921 3.1569 0.0016 0.3496 1.4945 **
##
## ---
## Signif. codes:  0 '***' 0.001 '**' 0.01 '*' 0.05 '.' 0.1 ' ' 1

```

## AUD - year

### Replicated Effect

#### Hours per day

##### Study 1

```
(vghrsday_audityear_ds1 <- t.test(vghrsday ~ alcsudyear, data=ds1audit))
```

```

##
## Welch Two Sample t-test
##
## data: vghrsday by alcsudyear
## t = -0.85426, df = 11.921, p-value = 0.4098
## alternative hypothesis: true difference in means is not equal to 0
## 95 percent confidence interval:
## -1.8720486 0.8180917
## sample estimates:
## mean in group 0 mean in group 1
## 2.223022 2.750000

```

##### Study 2

```
(vghrsday_audityear_ds2 <- t.test(vghrsday ~ alcsudyear, data=ds2audit))
```

```
##  
## Welch Two Sample t-test  
##  
## data: vghrsday by alcsudyear  
## t = 0.53456, df = 10.453, p-value = 0.6041  
## alternative hypothesis: true difference in means is not equal to 0  
## 95 percent confidence interval:  
## -0.8874763 1.4520614  
## sample estimates:  
## mean in group 0 mean in group 1  
## 3.425150 3.142857
```

## Hours per week

### Study 1

```
(vghrsweek_audityear_ds1 <- t.test(vghrsweek ~ alcsudyear,  
data=ds1audit))
```

```
##  
## Welch Two Sample t-test  
##  
## data: vghrsweek by alcsudyear  
## t = -1.0825, df = 11.964, p-value = 0.3003  
## alternative hypothesis: true difference in means is not equal to 0  
## 95 percent confidence interval:  
## -14.900581 5.010893  
## sample estimates:  
## mean in group 0 mean in group 1  
## 12.38849 17.33333
```

### Study 2

```
(vghrsweek_audityear_ds2 <- t.test(vghrsweek ~ alcsudyear,  
data=ds2audit))
```

```
##  
## Welch Two Sample t-test  
##  
## data: vghrsweek by alcsudyear  
## t = 1.2297, df = 28.353, p-value = 0.2289  
## alternative hypothesis: true difference in means is not equal to 0  
## 95 percent confidence interval:  
## -1.930179 7.736852  
## sample estimates:  
## mean in group 0 mean in group 1  
## 17.76048 14.85714
```

## Days per week

### Study 1

```
(vgdaysweek_audityear_ds1 <- t.test(vgdaysweek ~ alcsudyear,
data=ds1audit))

##
## Welch Two Sample t-test
##
## data:  vgdaysweek by alcsudyear
## t = -1.9119, df = 14.22, p-value = 0.07625
## alternative hypothesis: true difference in means is not equal to 0
## 95 percent confidence interval:
## -2.1837186  0.1237666
## sample estimates:
## mean in group 0 mean in group 1
##    5.136691    6.166667
```

### Study 2

```
(vgdaysweek_audityear_ds2 <- t.test(vgdaysweek ~ alcsudyear,
data=ds2audit))

##
## Welch Two Sample t-test
##
## data:  vgdaysweek by alcsudyear
## t = -0.53747, df = 6.8852, p-value = 0.6079
## alternative hypothesis: true difference in means is not equal to 0
## 95 percent confidence interval:
## -1.908263  1.203387
## sample estimates:
## mean in group 0 mean in group 1
##    4.790419    5.142857
```

## MD

### Hours per day

```
#Study 1
audityear_yes_ds1_vghrsday <- subset(audityear_yes_ds1, select =
c(vghrsday)) #Subset 1i data
audityear_vghrsday_m1i <- apply(audityear_yes_ds1_vghrsday, 2, mean)
#Calculate m1i
audityear_vghrsday_sd1i <- apply(audityear_yes_ds1_vghrsday, 2, sd)
#Calculate sd1i
audityear_vghrsday_n1i <- colSums(!is.na(audityear_yes_ds1_vghrsday))
#Calculate n1i
```

```

audityear_no_ds1_vghrsday <- subset(audityear_no_ds1, select =
c(vghrsday)) #Subset 2i data
audityear_vghrsday_m2i <- apply(audityear_no_ds1_vghrsday, 2, mean)
#Calculate m2i
audityear_vghrsday_sd2i <- apply(audityear_no_ds1_vghrsday, 2, sd)
#Calculate sd2i
audityear_vghrsday_n2i <- colSums(!is.na(audityear_no_ds1_vghrsday))
#Calculate n2i
ds1audityear_meta <- data.frame(m1i = audityear_vghrsday_m1i, sd1i =
audityear_vghrsday_sd1i, n1i = audityear_vghrsday_n1i, m2i =
audityear_vghrsday_m2i, sd2i = audityear_vghrsday_sd2i, n2i =
audityear_vghrsday_n2i) #MA dataframe
ds1audityear_meta <- escalc(measure="MD", m1i = m1i, sd1i = sd1i, n1i =
n1i, m2i = m2i, sd2i = sd2i, n2i = n2i, data=ds1audityear_meta) #Calculate
yi and vi

#Study 2
audityear_yes_ds2_vghrsday <- subset(audityear_yes_ds2, select =
c(vghrsday)) #Subset 1i data
audityear_vghrsday_m1i <- apply(audityear_yes_ds2_vghrsday, 2, mean)
#Calculate m1i
audityear_vghrsday_sd1i <- apply(audityear_yes_ds2_vghrsday, 2, sd)
#Calculate sd1i
audityear_vghrsday_n1i <- colSums(!is.na(audityear_yes_ds2_vghrsday))
#Calculate n1i
audityear_no_ds2_vghrsday <- subset(audityear_no_ds2, select =
c(vghrsday)) #Subset 2i data
audityear_vghrsday_m2i <- apply(audityear_no_ds2_vghrsday, 2, mean)
#Calculate m2i
audityear_vghrsday_sd2i <- apply(audityear_no_ds2_vghrsday, 2, sd)
#Calculate sd2i
audityear_vghrsday_n2i <- colSums(!is.na(audityear_no_ds2_vghrsday))
#Calculate n2i
ds2audityear_meta <- data.frame(m1i = audityear_vghrsday_m1i, sd1i =
audityear_vghrsday_sd1i, n1i = audityear_vghrsday_n1i, m2i =
audityear_vghrsday_m2i, sd2i = audityear_vghrsday_sd2i, n2i =
audityear_vghrsday_n2i) #MA dataframe
ds2audityear_meta <- escalc(measure="MD", m1i = m1i, sd1i = sd1i, n1i =
n1i, m2i = m2i, sd2i = sd2i, n2i = n2i, data=ds2audityear_meta) #Calculate
yi and vi

#FE meta-analysis
(audityear_meta <- rbind(ds1audityear_meta, ds2audityear_meta))

##      m1i  sd1i n1i   m2i  sd2i n2i   yi   vi
## 1 2.750000 2.094365 12 2.223022 1.444847 139 0.5270 0.3805
## 2 3.142857 1.214986  7 3.425150 3.369615 167 -0.2823 0.2789

(audityear_vghrsday_meta <- rma(yi=yi, vi=vi, measure="MD",
method="FE", data=audityear_meta))

```



```

##
## Fixed-Effects Model (k = 2)
##
## Test for Heterogeneity:
## Q(df = 1) = 0.9932, p-val = 0.3190
##
## Model Results:
##
## estimate      se      zval      pval      ci.lb      ci.ub
## 0.0600 0.4012 0.1494 0.8812 -0.7263 0.8462
##
## ---
## Signif. codes:  0 '***' 0.001 '**' 0.01 '*' 0.05 '.' 0.1 ' ' 1

```

## Hours per week

```

#Study 1
audityear_yes_ds1_vghrsweek <- subset(audityear_yes_ds1, select =
c(vghrsweek)) #Subset 1i data
audityear_vghrsweek_m1i <- apply(audityear_yes_ds1_vghrsweek, 2, mean)
#Calculate m1i
audityear_vghrsweek_sd1i <- apply(audityear_yes_ds1_vghrsweek, 2, sd)
#Calculate sd1i
audityear_vghrsweek_n1i <- colSums(!is.na(audityear_yes_ds1_vghrsweek))
#Calculate n1i
audityear_no_ds1_vghrsweek <- subset(audityear_no_ds1, select =
c(vghrsweek)) #Subset 2i data
audityear_vghrsweek_m2i <- apply(audityear_no_ds1_vghrsweek, 2, mean)
#Calculate m2i
audityear_vghrsweek_sd2i <- apply(audityear_no_ds1_vghrsweek, 2, sd)
#Calculate sd2i
audityear_vghrsweek_n2i <- colSums(!is.na(audityear_no_ds1_vghrsweek))
#Calculate n2i
ds1audityear_meta <- data.frame(m1i = audityear_vghrsweek_m1i, sd1i =
audityear_vghrsweek_sd1i, n1i = audityear_vghrsweek_n1i, m2i =
audityear_vghrsweek_m2i, sd2i = audityear_vghrsweek_sd2i, n2i =
audityear_vghrsweek_n2i) #MA dataframe
ds1audityear_meta <- escalc(measure="MD", m1i = m1i, sd1i = sd1i, n1i =
n1i, m2i = m2i, sd2i = sd2i, n2i = n2i, data=ds1audityear_meta) #Calculate
yi and vi

#Study 2
audityear_yes_ds2_vghrsweek <- subset(audityear_yes_ds2, select =
c(vghrsweek)) #Subset 1i data
audityear_vghrsweek_m1i <- apply(audityear_yes_ds2_vghrsweek, 2, mean)
#Calculate m1i
audityear_vghrsweek_sd1i <- apply(audityear_yes_ds2_vghrsweek, 2, sd)
#Calculate sd1i
audityear_vghrsweek_n1i <- colSums(!is.na(audityear_yes_ds2_vghrsweek))

```

```

#Calculate n1i
audityear_no_ds2_vghrsweek <- subset(audityear_no_ds2, select =
c(vghrsweek)) #Subset 2i data
audityear_vghrsweek_m2i <- apply(audityear_no_ds2_vghrsweek, 2, mean)
#Calculate m2i
audityear_vghrsweek_sd2i <- apply(audityear_no_ds2_vghrsweek, 2, sd)
#Calculate sd2i
audityear_vghrsweek_n2i <- colSums(!is.na(audityear_no_ds2_vghrsweek))
#Calculate n2i
ds2audityear_meta <- data.frame(m1i = audityear_vghrsweek_m1i, sd1i =
audityear_vghrsweek_sd1i, n1i = audityear_vghrsweek_n1i, m2i =
audityear_vghrsweek_m2i, sd2i = audityear_vghrsweek_sd2i, n2i =
audityear_vghrsweek_n2i) #MA dataframe
ds2audityear_meta <- escalc(measure="MD", m1i = m1i, sd1i = sd1i, n1i =
n1i, m2i = m2i, sd2i = sd2i, n2i = n2i, data=ds2audityear_meta) #Calculate
yi and vi

```

### #FE meta-analysis

```

(audityear_meta <- rbind(ds1audityear_meta, ds2audityear_meta))

```

```

##      m1i   sd1i n1i   m2i   sd2i n2i   yi   vi
## 1 17.33333 15.493889 12 12.38849 10.93360 139 4.9448 20.8651
## 2 14.85714 4.180453 7 17.76048 22.67056 167 -2.9033 5.5742

```

```

(audityear_vghrsweek_meta <- rma(yi=yi, vi=vi, measure="MD",
method="FE", data=audityear_meta))

```

```

##
## Fixed-Effects Model (k = 2)
##
## Test for Heterogeneity:
## Q(df = 1) = 2.3296, p-val = 0.1269
##
## Model Results:
##
## estimate      se    zval    pval  ci.lb  ci.ub
## -1.2487  2.0974 -0.5954  0.5516 -5.3595  2.8621
##
## ---
## Signif. codes:  0 '***' 0.001 '**' 0.01 '*' 0.05 '.' 0.1 ' ' 1

```

## Days per week

### #Study 1

```

audityear_yes_ds1_vgdaysweek <- subset(audityear_yes_ds1, select =
c(vgdaysweek)) #Subset 1i data
audityear_vgdaysweek_m1i <- apply(audityear_yes_ds1_vgdaysweek, 2,
mean) #Calculate m1i
audityear_vgdaysweek_sd1i <- apply(audityear_yes_ds1_vgdaysweek, 2, sd)
#Calculate sd1i

```

```

audityear_vgdaysweek_n1i <- colSums(!
is.na(audityear_yes_ds1_vgdaysweek)) #Calculate n1i
audityear_no_ds1_vgdaysweek <- subset(audityear_no_ds1, select =
c(vgdaysweek)) #Subset 2i data
audityear_vgdaysweek_m2i <- apply(audityear_no_ds1_vgdaysweek, 2,
mean) #Calculate m2i
audityear_vgdaysweek_sd2i <- apply(audityear_no_ds1_vgdaysweek, 2, sd)
#Calculate sd2i
audityear_vgdaysweek_n2i <- colSums(!
is.na(audityear_no_ds1_vgdaysweek)) #Calculate n2i
ds1audityear_meta <- data.frame(m1i = audityear_vgdaysweek_m1i, sd1i =
audityear_vgdaysweek_sd1i, n1i = audityear_vgdaysweek_n1i, m2i =
audityear_vgdaysweek_m2i, sd2i = audityear_vgdaysweek_sd2i, n2i =
audityear_vgdaysweek_n2i) #MA dataframe
ds1audityear_meta <- escalc(measure="MD", m1i = m1i, sd1i = sd1i, n1i =
n1i, m2i = m2i, sd2i = sd2i, n2i = n2i, data=ds1audityear_meta) #Calculate
yi and vi

```

### #Study 2

```

audityear_yes_ds2_vgdaysweek <- subset(audityear_yes_ds2, select =
c(vgdaysweek)) #Subset 1i data
audityear_vgdaysweek_m1i <- apply(audityear_yes_ds2_vgdaysweek, 2,
mean) #Calculate m1i
audityear_vgdaysweek_sd1i <- apply(audityear_yes_ds2_vgdaysweek, 2, sd)
#Calculate sd1i
audityear_vgdaysweek_n1i <- colSums(!
is.na(audityear_yes_ds2_vgdaysweek)) #Calculate n1i
audityear_no_ds2_vgdaysweek <- subset(audityear_no_ds2, select =
c(vgdaysweek)) #Subset 2i data
audityear_vgdaysweek_m2i <- apply(audityear_no_ds2_vgdaysweek, 2,
mean) #Calculate m2i
audityear_vgdaysweek_sd2i <- apply(audityear_no_ds2_vgdaysweek, 2, sd)
#Calculate sd2i
audityear_vgdaysweek_n2i <- colSums(!
is.na(audityear_no_ds2_vgdaysweek)) #Calculate n2i
ds2audityear_meta <- data.frame(m1i = audityear_vgdaysweek_m1i, sd1i =
audityear_vgdaysweek_sd1i, n1i = audityear_vgdaysweek_n1i, m2i =
audityear_vgdaysweek_m2i, sd2i = audityear_vgdaysweek_sd2i, n2i =
audityear_vgdaysweek_n2i) #MA dataframe
ds2audityear_meta <- escalc(measure="MD", m1i = m1i, sd1i = sd1i, n1i =
n1i, m2i = m2i, sd2i = sd2i, n2i = n2i, data=ds2audityear_meta) #Calculate
yi and vi

```

### #FE meta-analysis

```

(audityear_meta <- rbind(ds1audityear_meta, ds2audityear_meta))

```

```

##      m1i  sd1i n1i  m2i  sd2i n2i  yi  vi
## 1 6.166667 1.749459 12 5.136691 2.210651 139 1.0300 0.2902
## 2 5.142857 1.676163 7 4.790419 2.186576 167 0.3524 0.4300

```

```
(audityear_vgdaysweek_meta <- rma(yi=yi, vi=vi, measure="MD",  
method="FE", data=audityear_meta))
```

```
##
```

```
## Fixed-Effects Model (k = 2)
```

```
##
```

```
## Test for Heterogeneity:
```

```
## Q(df = 1) = 0.6374, p-val = 0.4247
```

```
##
```

```
## Model Results:
```

```
##
```

```
## estimate    se    zval    pval    ci.lb    ci.ub  
## 0.7570 0.4163 1.8185 0.0690 -0.0589 1.5728 .
```

```
##
```

```
## ---
```

```
## Signif. codes: 0 '***' 0.001 '**' 0.01 '*' 0.05 '.' 0.1 ' ' 1
```

## AUD - month

### Replicated Effect

#### Hours per day

Study 1 - CANNOT CALCULATE

Study 2 - CANNOT CALCULATE

#### Hours per week

Study 1 - CANNOT CALCULATE

Study 2 - CANNOT CALCULATE

#### Days per week

Study 1 - CANNOT CALCULATE

Study 2 - CANNOT CALCULATE

## MD

Hours per day - CANNOT CALCULATE

Hours per week - CANNOT CALCULATE

Days per week - CANNOT CALCULATE

## Cannabis - discharge

### Replicated Effect

#### Hours per day

##### Study 1

```
(vghrsday_cannabisdis_ds1 <- t.test(vghrsday ~ alcsuddis,  
data=ds1canscreen))
```

```
##
```

```
## Welch Two Sample t-test
```

```
##
```

```
## data: vghrsday by alcsuddis
```

```
## t = 0.12694, df = 50.83, p-value = 0.8995
```

```
## alternative hypothesis: true difference in means is not equal to 0
```

```
## 95 percent confidence interval:
```

```
## -0.6667342 0.7567342
## sample estimates:
## mean in group 0 mean in group 1
##      1.925      1.880
```

## Study 2

```
(vghrsday_cannabisdis_ds2 <- t.test(vghrsday ~ alcsuddis,
data=ds2canscreen))
```

```
##
## Welch Two Sample t-test
##
## data: vghrsday by alcsuddis
## t = 1.7056, df = 122.37, p-value = 0.09063
## alternative hypothesis: true difference in means is not equal to 0
## 95 percent confidence interval:
## -0.1629379 2.1916520
## sample estimates:
## mean in group 0 mean in group 1
##      4.292135      3.277778
```

## Hours per week

### Study 1

```
(vghrsweek_cannabisdis_ds1 <- t.test(vghrsweek ~ alcsuddis,
data=ds1canscreen))
```

```
##
## Welch Two Sample t-test
##
## data: vghrsweek by alcsuddis
## t = -0.63036, df = 51.991, p-value = 0.5312
## alternative hypothesis: true difference in means is not equal to 0
## 95 percent confidence interval:
## -6.797929 3.547929
## sample estimates:
## mean in group 0 mean in group 1
##      9.775      11.400
```

### Study 2

```
(vghrsweek_cannabisdis_ds2 <- t.test(vghrsweek ~ alcsuddis,
data=ds2canscreen))
```

```
##
## Welch Two Sample t-test
```

```
##
## data: vghrsweek by alcsuddis
## t = 1.4711, df = 122.99, p-value = 0.1438
## alternative hypothesis: true difference in means is not equal to 0
## 95 percent confidence interval:
## -2.017546 13.694824
## sample estimates:
## mean in group 0 mean in group 1
##      22.97753      17.13889
```

## Days per week

### Study 1

```
(vgdaysweek_cannabisdis_ds1 <- t.test(vgdaysweek ~ alcsuddis,
data=ds1canscreen))
```

```
##
## Welch Two Sample t-test
##
## data: vgdaysweek by alcsuddis
## t = -1.7787, df = 57.666, p-value = 0.08057
## alternative hypothesis: true difference in means is not equal to 0
## 95 percent confidence interval:
## -2.0298917 0.1198917
## sample estimates:
## mean in group 0 mean in group 1
##      4.725      5.680
```

### Study 2

```
(vgdaysweek_cannabisdis_ds2 <- t.test(vgdaysweek ~ alcsuddis,
data=ds2canscreen))
```

```
##
## Welch Two Sample t-test
##
## data: vgdaysweek by alcsuddis
## t = -1.2, df = 66.834, p-value = 0.2344
## alternative hypothesis: true difference in means is not equal to 0
## 95 percent confidence interval:
## -1.4031763 0.3494934
## sample estimates:
## mean in group 0 mean in group 1
##      4.584270      5.111111
```

## MD

### Hours per day

```
#Study 1
cannabisdis_yes_ds1_vghrsday <- subset(cannabisdis_yes_ds1, select =
c(vghrsday)) #Subset 1i data
cannabisdis_vghrsday_m1i <- apply(cannabisdis_yes_ds1_vghrsday, 2, mean)
#Calculate m1i
cannabisdis_vghrsday_sd1i <- apply(cannabisdis_yes_ds1_vghrsday, 2, sd)
#Calculate sd1i
cannabisdis_vghrsday_n1i <- colSums(!is.na(cannabisdis_yes_ds1_vghrsday))
#Calculate n1i
cannabisdis_no_ds1_vghrsday <- subset(cannabisdis_no_ds1, select =
c(vghrsday)) #Subset 2i data
cannabisdis_vghrsday_m2i <- apply(cannabisdis_no_ds1_vghrsday, 2, mean)
#Calculate m2i
cannabisdis_vghrsday_sd2i <- apply(cannabisdis_no_ds1_vghrsday, 2, sd)
#Calculate sd2i
cannabisdis_vghrsday_n2i <- colSums(!is.na(cannabisdis_no_ds1_vghrsday))
#Calculate n2i
ds1cannabisdis_meta <- data.frame(m1i = cannabisdis_vghrsday_m1i, sd1i =
cannabisdis_vghrsday_sd1i, n1i = cannabisdis_vghrsday_n1i, m2i =
cannabisdis_vghrsday_m2i, sd2i = cannabisdis_vghrsday_sd2i, n2i =
cannabisdis_vghrsday_n2i) #MA dataframe
ds1cannabisdis_meta <- escalc(measure="MD", m1i = m1i, sd1i = sd1i, n1i =
n1i, m2i = m2i, sd2i = sd2i, n2i = n2i, data=ds1cannabisdis_meta)
#Calculate yi and vi

#Study 2
cannabisdis_yes_ds2_vghrsday <- subset(cannabisdis_yes_ds2, select =
c(vghrsday)) #Subset 1i data
cannabisdis_vghrsday_m1i <- apply(cannabisdis_yes_ds2_vghrsday, 2, mean)
#Calculate m1i
cannabisdis_vghrsday_sd1i <- apply(cannabisdis_yes_ds2_vghrsday, 2, sd)
#Calculate sd1i
cannabisdis_vghrsday_n1i <- colSums(!is.na(cannabisdis_yes_ds2_vghrsday))
#Calculate n1i
cannabisdis_no_ds2_vghrsday <- subset(cannabisdis_no_ds2, select =
c(vghrsday)) #Subset 2i data
cannabisdis_vghrsday_m2i <- apply(cannabisdis_no_ds2_vghrsday, 2, mean)
#Calculate m2i
cannabisdis_vghrsday_sd2i <- apply(cannabisdis_no_ds2_vghrsday, 2, sd)
#Calculate sd2i
cannabisdis_vghrsday_n2i <- colSums(!is.na(cannabisdis_no_ds2_vghrsday))
#Calculate n2i
ds2cannabisdis_meta <- data.frame(m1i = cannabisdis_vghrsday_m1i, sd1i =
cannabisdis_vghrsday_sd1i, n1i = cannabisdis_vghrsday_n1i, m2i =
cannabisdis_vghrsday_m2i, sd2i = cannabisdis_vghrsday_sd2i, n2i =
cannabisdis_vghrsday_n2i) #MA dataframe
```



```
ds2cannabisdis_meta <- escalc(measure="MD", m1i = m1i, sd1i = sd1i, n1i
= n1i, m2i = m2i, sd2i = sd2i, n2i = n2i, data=ds2cannabisdis_meta)
#Calculate yi and vi
```

```
#FE meta-analysis
```

```
(cannabisdis_meta <- rbind(ds1cannabisdis_meta, ds2cannabisdis_meta))
```

```
##      m1i  sd1i n1i   m2i  sd2i n2i   yi  vi
## 1 1.880000 1.394035 25 1.925000 1.384669 40 -0.0450 0.1257
## 2 3.277778 2.008711 36 4.292135 4.637305 89 -1.0144 0.3537
```

```
(cannabisdis_vghrsday_meta <- rma(yi=yi, vi=vi, measure="MD",
method="FE", data=cannabisdis_meta))
```

```
##
```

```
## Fixed-Effects Model (k = 2)
```

```
##
```

```
## Test for Heterogeneity:
```

```
## Q(df = 1) = 1.9602, p-val = 0.1615
```

```
##
```

```
## Model Results:
```

```
##
```

```
## estimate    se    zval    pval    ci.lb    ci.ub
## -0.2991    0.3045 -0.9823    0.3260 -0.8959    0.2977
```

```
##
```

```
## ---
```

```
## Signif. codes:  0 '***' 0.001 '**' 0.01 '*' 0.05 '.' 0.1 ' ' 1
```

## Hours per week

```
#Study 1
```

```
cannabisdis_yes_ds1_vghrsweek <- subset(cannabisdis_yes_ds1, select =
c(vghrsweek)) #Subset 1i data
```

```
cannabisdis_vghrsweek_m1i <- apply(cannabisdis_yes_ds1_vghrsweek, 2,
mean) #Calculate m1i
```

```
cannabisdis_vghrsweek_sd1i <- apply(cannabisdis_yes_ds1_vghrsweek, 2, sd)
#Calculate sd1i
```

```
cannabisdis_vghrsweek_n1i <- colSums(!
is.na(cannabisdis_yes_ds1_vghrsweek)) #Calculate n1i
```

```
cannabisdis_no_ds1_vghrsweek <- subset(cannabisdis_no_ds1, select =
c(vghrsweek)) #Subset 2i data
```

```
cannabisdis_vghrsweek_m2i <- apply(cannabisdis_no_ds1_vghrsweek, 2,
mean) #Calculate m2i
```

```
cannabisdis_vghrsweek_sd2i <- apply(cannabisdis_no_ds1_vghrsweek, 2, sd)
#Calculate sd2i
```

```
cannabisdis_vghrsweek_n2i <- colSums(!
is.na(cannabisdis_no_ds1_vghrsweek)) #Calculate n2i
```

```
ds1cannabisdis_meta <- data.frame(m1i = cannabisdis_vghrsweek_m1i, sd1i
= cannabisdis_vghrsweek_sd1i, n1i = cannabisdis_vghrsweek_n1i, m2i =
cannabisdis_vghrsweek_m2i, sd2i = cannabisdis_vghrsweek_sd2i, n2i =
```

```

cannabisdis_vghrsweek_n2i) #MA dataframe
ds1cannabisdis_meta <- escalc(measure="MD", m1i = m1i, sd1i = sd1i, n1i
= n1i, m2i = m2i, sd2i = sd2i, n2i = n2i, data=ds1cannabisdis_meta)
#Calculate yi and vi

#Study 2
cannabisdis_yes_ds2_vghrsweek <- subset(cannabisdis_yes_ds2, select =
c(vghrsweek)) #Subset 1i data
cannabisdis_vghrsweek_m1i <- apply(cannabisdis_yes_ds2_vghrsweek, 2,
mean) #Calculate m1i
cannabisdis_vghrsweek_sd1i <- apply(cannabisdis_yes_ds2_vghrsweek, 2, sd)
#Calculate sd1i
cannabisdis_vghrsweek_n1i <- colSums(!
is.na(cannabisdis_yes_ds2_vghrsweek)) #Calculate n1i
cannabisdis_no_ds2_vghrsweek <- subset(cannabisdis_no_ds2, select =
c(vghrsweek)) #Subset 2i data
cannabisdis_vghrsweek_m2i <- apply(cannabisdis_no_ds2_vghrsweek, 2,
mean) #Calculate m2i
cannabisdis_vghrsweek_sd2i <- apply(cannabisdis_no_ds2_vghrsweek, 2, sd)
#Calculate sd2i
cannabisdis_vghrsweek_n2i <- colSums(!
is.na(cannabisdis_no_ds2_vghrsweek)) #Calculate n2i
ds2cannabisdis_meta <- data.frame(m1i = cannabisdis_vghrsweek_m1i, sd1i
= cannabisdis_vghrsweek_sd1i, n1i = cannabisdis_vghrsweek_n1i, m2i =
cannabisdis_vghrsweek_m2i, sd2i = cannabisdis_vghrsweek_sd2i, n2i =
cannabisdis_vghrsweek_n2i) #MA dataframe
ds2cannabisdis_meta <- escalc(measure="MD", m1i = m1i, sd1i = sd1i, n1i
= n1i, m2i = m2i, sd2i = sd2i, n2i = n2i, data=ds2cannabisdis_meta)
#Calculate yi and vi

#FE meta-analysis
(cannabisdis_meta <- rbind(ds1cannabisdis_meta, ds2cannabisdis_meta))

##      m1i  sd1i n1i   m2i  sd2i n2i   yi   vi
## 1 11.40000 10.02081 25  9.77500 10.25442 40 1.6250 6.6455
## 2 17.13889 12.63816 36 22.97753 31.73433 89 -5.8386 15.7521

(cannabisdis_vghrsweek_meta <- rma(yi=yi, vi=vi, measure="MD",
method="FE", data=cannabisdis_meta))

##
## Fixed-Effects Model (k = 2)
##
## Test for Heterogeneity:
## Q(df = 1) = 2.4871, p-val = 0.1148
##
## Model Results:
##
## estimate    se    zval    pval  ci.lb  ci.ub
## -0.5895    2.1619 -0.2727  0.7851 -4.8267  3.6477
##

```

```
## ---  
## Signif. codes:  0 '***' 0.001 '**' 0.01 '*' 0.05 '.' 0.1 ' ' 1
```

## Days per week

### #Study 1

```
cannabisdis_yes_ds1_vgdaysweek <- subset(cannabisdis_yes_ds1, select =  
c(vgdaysweek)) #Subset 1i data  
cannabisdis_vgdaysweek_m1i <- apply(cannabisdis_yes_ds1_vgdaysweek, 2,  
mean) #Calculate m1i  
cannabisdis_vgdaysweek_sd1i <- apply(cannabisdis_yes_ds1_vgdaysweek, 2,  
sd) #Calculate sd1i  
cannabisdis_vgdaysweek_n1i <- colSums(!  
is.na(cannabisdis_yes_ds1_vgdaysweek)) #Calculate n1i  
cannabisdis_no_ds1_vgdaysweek <- subset(cannabisdis_no_ds1, select =  
c(vgdaysweek)) #Subset 2i data  
cannabisdis_vgdaysweek_m2i <- apply(cannabisdis_no_ds1_vgdaysweek, 2,  
mean) #Calculate m2i  
cannabisdis_vgdaysweek_sd2i <- apply(cannabisdis_no_ds1_vgdaysweek, 2,  
sd) #Calculate sd2i  
cannabisdis_vgdaysweek_n2i <- colSums(!  
is.na(cannabisdis_no_ds1_vgdaysweek)) #Calculate n2i  
ds1cannabisdis_meta <- data.frame(m1i = cannabisdis_vgdaysweek_m1i,  
sd1i = cannabisdis_vgdaysweek_sd1i, n1i = cannabisdis_vgdaysweek_n1i,  
m2i = cannabisdis_vgdaysweek_m2i, sd2i = cannabisdis_vgdaysweek_sd2i,  
n2i = cannabisdis_vgdaysweek_n2i) #MA dataframe  
ds1cannabisdis_meta <- escalc(measure="MD", m1i = m1i, sd1i = sd1i, n1i  
= n1i, m2i = m2i, sd2i = sd2i, n2i = n2i, data=ds1cannabisdis_meta)  
#Calculate yi and vi
```

### #Study 2

```
cannabisdis_yes_ds2_vgdaysweek <- subset(cannabisdis_yes_ds2, select =  
c(vgdaysweek)) #Subset 1i data  
cannabisdis_vgdaysweek_m1i <- apply(cannabisdis_yes_ds2_vgdaysweek, 2,  
mean) #Calculate m1i  
cannabisdis_vgdaysweek_sd1i <- apply(cannabisdis_yes_ds2_vgdaysweek, 2,  
sd) #Calculate sd1i  
cannabisdis_vgdaysweek_n1i <- colSums(!  
is.na(cannabisdis_yes_ds2_vgdaysweek)) #Calculate n1i  
cannabisdis_no_ds2_vgdaysweek <- subset(cannabisdis_no_ds2, select =  
c(vgdaysweek)) #Subset 2i data  
cannabisdis_vgdaysweek_m2i <- apply(cannabisdis_no_ds2_vgdaysweek, 2,  
mean) #Calculate m2i  
cannabisdis_vgdaysweek_sd2i <- apply(cannabisdis_no_ds2_vgdaysweek, 2,  
sd) #Calculate sd2i  
cannabisdis_vgdaysweek_n2i <- colSums(!  
is.na(cannabisdis_no_ds2_vgdaysweek)) #Calculate n2i  
ds2cannabisdis_meta <- data.frame(m1i = cannabisdis_vgdaysweek_m1i,  
sd1i = cannabisdis_vgdaysweek_sd1i, n1i = cannabisdis_vgdaysweek_n1i,
```

```

m2i = cannabisdis_vgdaysweek_m2i, sd2i = cannabisdis_vgdaysweek_sd2i,
n2i = cannabisdis_vgdaysweek_n2i) #MA dataframe
ds2cannabisdis_meta <- escalc(measure="MD", m1i = m1i, sd1i = sd1i, n1i
= n1i, m2i = m2i, sd2i = sd2i, n2i = n2i, data=ds2cannabisdis_meta)
#Calculate yi and vi

#FE meta-analysis
(cannabisdis_meta <- rbind(ds1cannabisdis_meta, ds2cannabisdis_meta))

##      m1i  sd1i n1i  m2i  sd2i n2i  yi  vi
## 1 5.680000 1.951922 25 4.72500 2.331364 40 0.9550 0.2883
## 2 5.111111 2.201010 36 4.58427 2.275407 89 0.5268 0.1927

(cannabisdis_vgdaysweek_meta <- rma(yi=yi, vi=vi, measure="MD",
method="FE", data=cannabisdis_meta))

##
## Fixed-Effects Model (k = 2)
##
## Test for Heterogeneity:
## Q(df = 1) = 0.3811, p-val = 0.5370
##
## Model Results:
##
## estimate    se    zval    pval    ci.lb    ci.ub
## 0.6984 0.3399 2.0549 0.0399 0.0323 1.3645 *
##
## ---
## Signif. codes: 0 '***' 0.001 '**' 0.01 '*' 0.05 '.' 0.1 ' ' 1

```

## Cannabis - year

### Replicated Effect

#### Hours per day

##### Study 1

```

(vghrsday_cannabisyear_ds1 <- t.test(vghrsday ~ alcsudyear,
data=ds1canscreen))

```

```

##
## Welch Two Sample t-test
##
## data: vghrsday by alcsudyear
## t = 0.30367, df = 23.968, p-value = 0.764
## alternative hypothesis: true difference in means is not equal to 0
## 95 percent confidence interval:

```

```
## -0.7320251 0.9845761
## sample estimates:
## mean in group 0 mean in group 1
## 1.938776 1.812500
```

### Study 2

```
(vghrsday_cannabisyear_ds2 <- t.test(vghrsday ~ alcsudyear,
data=ds2canscreen))
```

```
##
## Welch Two Sample t-test
##
## data: vghrsday by alcsudyear
## t = 2.1796, df = 76.735, p-value = 0.03235
## alternative hypothesis: true difference in means is not equal to 0
## 95 percent confidence interval:
## 0.1087565 2.4095586
## sample estimates:
## mean in group 0 mean in group 1
## 4.211538 2.952381
```

## Hours per week

### Study 1

```
(vghrsweek_cannabisyear_ds1 <- t.test(vghrsweek ~ alcsudyear,
data=ds1canscreen))
```

```
##
## Welch Two Sample t-test
##
## data: vghrsweek by alcsudyear
## t = -0.41554, df = 25.829, p-value = 0.6812
## alternative hypothesis: true difference in means is not equal to 0
## 95 percent confidence interval:
## -7.200108 4.779190
## sample estimates:
## mean in group 0 mean in group 1
## 10.10204 11.31250
```

### Study 2

```
(vghrsweek_cannabisyear_ds2 <- t.test(vghrsweek ~ alcsudyear,
data=ds2canscreen))
```

```
##
## Welch Two Sample t-test
```

```
##
## data: vghrsweek by alcsudyear
## t = 2.0802, df = 64.431, p-value = 0.04149
## alternative hypothesis: true difference in means is not equal to 0
## 95 percent confidence interval:
##  0.3443176 16.9652062
## sample estimates:
## mean in group 0 mean in group 1
##    22.75000    14.09524
```

## Days per week

### Study 1

```
(vgdaysweek_cannabisyear_ds1 <- t.test(vgdaysweek ~ alcsudyear,
data=ds1canscreen))
```

```
##
## Welch Two Sample t-test
##
## data: vgdaysweek by alcsudyear
## t = -2.467, df = 36.915, p-value = 0.01839
## alternative hypothesis: true difference in means is not equal to 0
## 95 percent confidence interval:
## -2.3441132 -0.2298664
## sample estimates:
## mean in group 0 mean in group 1
##    4.77551    6.06250
```

### Study 2

```
(vgdaysweek_cannabisyear_ds2 <- t.test(vgdaysweek ~ alcsudyear,
data=ds2canscreen))
```

```
##
## Welch Two Sample t-test
##
## data: vgdaysweek by alcsudyear
## t = 0.64639, df = 27.298, p-value = 0.5234
## alternative hypothesis: true difference in means is not equal to 0
## 95 percent confidence interval:
## -0.8028169 1.5418279
## sample estimates:
## mean in group 0 mean in group 1
##    4.798077    4.428571
```

## MD

### Hours per day

```
#Study 1
cannabisyear_yes_ds1_vghrsday <- subset(cannabisyear_yes_ds1, select =
c(vghrsday)) #Subset 1i data
cannabisyear_vghrsday_m1i <- apply(cannabisyear_yes_ds1_vghrsday, 2,
mean) #Calculate m1i
cannabisyear_vghrsday_sd1i <- apply(cannabisyear_yes_ds1_vghrsday, 2, sd)
#Calculate sd1i
cannabisyear_vghrsday_n1i <- colSums(!
is.na(cannabisyear_yes_ds1_vghrsday)) #Calculate n1i
cannabisyear_no_ds1_vghrsday <- subset(cannabisyear_no_ds1, select =
c(vghrsday)) #Subset 2i data
cannabisyear_vghrsday_m2i <- apply(cannabisyear_no_ds1_vghrsday, 2,
mean) #Calculate m2i
cannabisyear_vghrsday_sd2i <- apply(cannabisyear_no_ds1_vghrsday, 2, sd)
#Calculate sd2i
cannabisyear_vghrsday_n2i <- colSums(!
is.na(cannabisyear_no_ds1_vghrsday)) #Calculate n2i
ds1cannabisyear_meta <- data.frame(m1i = cannabisyear_vghrsday_m1i,
sd1i = cannabisyear_vghrsday_sd1i, n1i = cannabisyear_vghrsday_n1i, m2i =
cannabisyear_vghrsday_m2i, sd2i = cannabisyear_vghrsday_sd2i, n2i =
cannabisyear_vghrsday_n2i) #MA dataframe
ds1cannabisyear_meta <- escalc(measure="MD", m1i = m1i, sd1i = sd1i, n1i
= n1i, m2i = m2i, sd2i = sd2i, n2i = n2i, data=ds1cannabisyear_meta)
#Calculate yi and vi

#Study 2
cannabisyear_yes_ds2_vghrsday <- subset(cannabisyear_yes_ds2, select =
c(vghrsday)) #Subset 1i data
cannabisyear_vghrsday_m1i <- apply(cannabisyear_yes_ds2_vghrsday, 2,
mean) #Calculate m1i
cannabisyear_vghrsday_sd1i <- apply(cannabisyear_yes_ds2_vghrsday, 2, sd)
#Calculate sd1i
cannabisyear_vghrsday_n1i <- colSums(!
is.na(cannabisyear_yes_ds2_vghrsday)) #Calculate n1i
cannabisyear_no_ds2_vghrsday <- subset(cannabisyear_no_ds2, select =
c(vghrsday)) #Subset 2i data
cannabisyear_vghrsday_m2i <- apply(cannabisyear_no_ds2_vghrsday, 2,
mean) #Calculate m2i
cannabisyear_vghrsday_sd2i <- apply(cannabisyear_no_ds2_vghrsday, 2, sd)
#Calculate sd2i
cannabisyear_vghrsday_n2i <- colSums(!
is.na(cannabisyear_no_ds2_vghrsday)) #Calculate n2i
ds2cannabisyear_meta <- data.frame(m1i = cannabisyear_vghrsday_m1i,
sd1i = cannabisyear_vghrsday_sd1i, n1i = cannabisyear_vghrsday_n1i, m2i =
cannabisyear_vghrsday_m2i, sd2i = cannabisyear_vghrsday_sd2i, n2i =
cannabisyear_vghrsday_n2i) #MA dataframe
```

```

ds2cannabisyear_meta <- escalc(measure="MD", m1i = m1i, sd1i = sd1i, n1i
= n1i, m2i = m2i, sd2i = sd2i, n2i = n2i, data=ds2cannabisyear_meta)
#Calculate yi and vi

#FE meta-analysis
(cannabisyear_meta <- rbind(ds1cannabisyear_meta,
ds2cannabisyear_meta))

##      m1i  sd1i n1i  m2i  sd2i n2i  yi  vi
## 1 1.812500 1.470544 16 1.938776 1.360272 49 -0.1263 0.1729
## 2 2.952381 1.774153 21 4.211538 4.372627 104 -1.2592 0.3337

(cannabisyear_vghrsday_meta <- rma(yi=yi, vi=vi, measure="MD",
method="FE", data=cannabisyear_meta))

##
## Fixed-Effects Model (k = 2)
##
## Test for Heterogeneity:
## Q(df = 1) = 2.5332, p-val = 0.1115
##
## Model Results:
##
## estimate      se    zval    pval  ci.lb  ci.ub
## -0.5129  0.3375 -1.5198  0.1286 -1.1744  0.1485
##
## ---
## Signif. codes:  0 '***' 0.001 '**' 0.01 '*' 0.05 '.' 0.1 ' ' 1

```

## Hours per week

```

#Study 1
cannabisyear_yes_ds1_vghrsweek <- subset(cannabisyear_yes_ds1, select =
c(vghrsweek)) #Subset 1i data
cannabisyear_vghrsweek_m1i <- apply(cannabisyear_yes_ds1_vghrsweek, 2,
mean) #Calculate m1i
cannabisyear_vghrsweek_sd1i <- apply(cannabisyear_yes_ds1_vghrsweek, 2,
sd) #Calculate sd1i
cannabisyear_vghrsweek_n1i <- colSums(!
is.na(cannabisyear_yes_ds1_vghrsweek)) #Calculate n1i
cannabisyear_no_ds1_vghrsweek <- subset(cannabisyear_no_ds1, select =
c(vghrsweek)) #Subset 2i data
cannabisyear_vghrsweek_m2i <- apply(cannabisyear_no_ds1_vghrsweek, 2,
mean) #Calculate m2i
cannabisyear_vghrsweek_sd2i <- apply(cannabisyear_no_ds1_vghrsweek, 2,
sd) #Calculate sd2i
cannabisyear_vghrsweek_n2i <- colSums(!
is.na(cannabisyear_no_ds1_vghrsweek)) #Calculate n2i
ds1cannabisyear_meta <- data.frame(m1i = cannabisyear_vghrsweek_m1i,
sd1i = cannabisyear_vghrsweek_sd1i, n1i = cannabisyear_vghrsweek_n1i,

```



```

m2i = cannabisyear_vghrsweek_m2i, sd2i = cannabisyear_vghrsweek_sd2i,
n2i = cannabisyear_vghrsweek_n2i) #MA dataframe
ds1cannabisyear_meta <- escalc(measure="MD", m1i = m1i, sd1i = sd1i, n1i
= n1i, m2i = m2i, sd2i = sd2i, n2i = n2i, data=ds1cannabisyear_meta)
#Calculate yi and vi

```

### #Study 2

```

cannabisyear_yes_ds2_vghrsweek <- subset(cannabisyear_yes_ds2, select =
c(vghrsweek)) #Subset 1i data
cannabisyear_vghrsweek_m1i <- apply(cannabisyear_yes_ds2_vghrsweek, 2,
mean) #Calculate m1i
cannabisyear_vghrsweek_sd1i <- apply(cannabisyear_yes_ds2_vghrsweek, 2,
sd) #Calculate sd1i
cannabisyear_vghrsweek_n1i <- colSums(!
is.na(cannabisyear_yes_ds2_vghrsweek)) #Calculate n1i
cannabisyear_no_ds2_vghrsweek <- subset(cannabisyear_no_ds2, select =
c(vghrsweek)) #Subset 2i data
cannabisyear_vghrsweek_m2i <- apply(cannabisyear_no_ds2_vghrsweek, 2,
mean) #Calculate m2i
cannabisyear_vghrsweek_sd2i <- apply(cannabisyear_no_ds2_vghrsweek, 2,
sd) #Calculate sd2i
cannabisyear_vghrsweek_n2i <- colSums(!
is.na(cannabisyear_no_ds2_vghrsweek)) #Calculate n2i
ds2cannabisyear_meta <- data.frame(m1i = cannabisyear_vghrsweek_m1i,
sd1i = cannabisyear_vghrsweek_sd1i, n1i = cannabisyear_vghrsweek_n1i,
m2i = cannabisyear_vghrsweek_m2i, sd2i = cannabisyear_vghrsweek_sd2i,
n2i = cannabisyear_vghrsweek_n2i) #MA dataframe
ds2cannabisyear_meta <- escalc(measure="MD", m1i = m1i, sd1i = sd1i, n1i
= n1i, m2i = m2i, sd2i = sd2i, n2i = n2i, data=ds2cannabisyear_meta)
#Calculate yi and vi

```

### #FE meta-analysis

```

(cannabisyear_meta <- rbind(ds1cannabisyear_meta,
ds2cannabisyear_meta))

```

```

##      m1i  sd1i n1i   m2i  sd2i n2i   yi   vi
## 1 11.31250 10.08444 16 10.10204 10.21487 49 1.2105 8.4854
## 2 14.09524 13.67445 21 22.75000 29.56604 104 -8.6548 17.3096

```

```

(cannabisyear_vghrsweek_meta <- rma(yi=yi, vi=vi, measure="MD",
method="FE", data=cannabisyear_meta))

```

```

##
## Fixed-Effects Model (k = 2)
##
## Test for Heterogeneity:
## Q(df = 1) = 3.7729, p-val = 0.0521
##
## Model Results:
##
## estimate      se      zval      pval      ci.lb      ci.ub

```

```
## -2.0348  2.3862 -0.8527  0.3938 -6.7117  2.6422
##
## ---
## Signif. codes:  0 '***' 0.001 '**' 0.01 '*' 0.05 '.' 0.1 ' ' 1
```

## Days per week

### #Study 1

```
cannabisyear_yes_ds1_vgdaysweek <- subset(cannabisyear_yes_ds1, select
= c(vgdaysweek)) #Subset 1i data
cannabisyear_vgdaysweek_m1i <- apply(cannabisyear_yes_ds1_vgdaysweek,
2, mean) #Calculate m1i
cannabisyear_vgdaysweek_sd1i <- apply(cannabisyear_yes_ds1_vgdaysweek,
2, sd) #Calculate sd1i
cannabisyear_vgdaysweek_n1i <- colSums(!
is.na(cannabisyear_yes_ds1_vgdaysweek)) #Calculate n1i
cannabisyear_no_ds1_vgdaysweek <- subset(cannabisyear_no_ds1, select =
c(vgdaysweek)) #Subset 2i data
cannabisyear_vgdaysweek_m2i <- apply(cannabisyear_no_ds1_vgdaysweek,
2, mean) #Calculate m2i
cannabisyear_vgdaysweek_sd2i <- apply(cannabisyear_no_ds1_vgdaysweek,
2, sd) #Calculate sd2i
cannabisyear_vgdaysweek_n2i <- colSums(!
is.na(cannabisyear_no_ds1_vgdaysweek)) #Calculate n2i
ds1cannabisyear_meta <- data.frame(m1i = cannabisyear_vgdaysweek_m1i,
sd1i = cannabisyear_vgdaysweek_sd1i, n1i = cannabisyear_vgdaysweek_n1i,
m2i = cannabisyear_vgdaysweek_m2i, sd2i =
cannabisyear_vgdaysweek_sd2i, n2i = cannabisyear_vgdaysweek_n2i) #MA
dataframe
ds1cannabisyear_meta <- escalc(measure="MD", m1i = m1i, sd1i = sd1i, n1i
= n1i, m2i = m2i, sd2i = sd2i, n2i = n2i, data=ds1cannabisyear_meta)
#Calculate yi and vi
```

### #Study 2

```
cannabisyear_yes_ds2_vgdaysweek <- subset(cannabisyear_yes_ds2, select
= c(vgdaysweek)) #Subset 1i data
cannabisyear_vgdaysweek_m1i <- apply(cannabisyear_yes_ds2_vgdaysweek,
2, mean) #Calculate m1i
cannabisyear_vgdaysweek_sd1i <- apply(cannabisyear_yes_ds2_vgdaysweek,
2, sd) #Calculate sd1i
cannabisyear_vgdaysweek_n1i <- colSums(!
is.na(cannabisyear_yes_ds2_vgdaysweek)) #Calculate n1i
cannabisyear_no_ds2_vgdaysweek <- subset(cannabisyear_no_ds2, select =
c(vgdaysweek)) #Subset 2i data
cannabisyear_vgdaysweek_m2i <- apply(cannabisyear_no_ds2_vgdaysweek,
2, mean) #Calculate m2i
cannabisyear_vgdaysweek_sd2i <- apply(cannabisyear_no_ds2_vgdaysweek,
2, sd) #Calculate sd2i
cannabisyear_vgdaysweek_n2i <- colSums(!
```

```

is.na(cannabisyear_no_ds2_vgdaysweek)) #Calculate n2i
ds2cannabisyear_meta <- data.frame(m1i = cannabisyear_vgdaysweek_m1i,
sd1i = cannabisyear_vgdaysweek_sd1i, n1i = cannabisyear_vgdaysweek_n1i,
m2i = cannabisyear_vgdaysweek_m2i, sd2i =
cannabisyear_vgdaysweek_sd2i, n2i = cannabisyear_vgdaysweek_n2i) #MA
dataframe
ds2cannabisyear_meta <- escalc(measure="MD", m1i = m1i, sd1i = sd1i, n1i
= n1i, m2i = m2i, sd2i = sd2i, n2i = n2i, data=ds2cannabisyear_meta)
#Calculate yi and vi

#FE meta-analysis
(cannabisyear_meta <- rbind(ds1cannabisyear_meta,
ds2cannabisyear_meta))

##      m1i  sd1i n1i  m2i  sd2i n2i  yi  vi
## 1 6.062500 1.611159 16 4.775510 2.320787 49 1.2870 0.2722
## 2 4.428571 2.420153 21 4.798077 2.231199 104 -0.3695 0.3268

(cannabisyear_vgdaysweek_meta <- rma(yi=yi, vi=vi, measure="MD",
method="FE", data=cannabisyear_meta))

##
## Fixed-Effects Model (k = 2)
##
## Test for Heterogeneity:
## Q(df = 1) = 4.5814, p-val = 0.0323
##
## Model Results:
##
## estimate    se    zval    pval  ci.lb  ci.ub
## 0.5343 0.3853 1.3865 0.1656 -0.2210 1.2895
##
## ---
## Signif. codes: 0 '***' 0.001 '**' 0.01 '*' 0.05 '.' 0.1 ' ' 1

```

## Cannabis - month

### Replicated Effect

#### Hours per day

##### Study 1 - CANNOT CALCULATE

##### Study 2

```

(vghrsday_cannabismonth_ds2 <- t.test(vghrsday ~ alcsudmonth,
data=ds2canscreen))

```

```
##
## Welch Two Sample t-test
##
## data: vghrsday by alcsudmonth
## t = 0.91169, df = 8.7714, p-value = 0.3863
## alternative hypothesis: true difference in means is not equal to 0
## 95 percent confidence interval:
## -1.044242  2.444802
## sample estimates:
## mean in group 0 mean in group 1
##      4.033613      3.333333
```

## Hours per week

### Study 1 - CANNOT CALCULATE

#### Study 2

```
(vghrsweek_cannabismnth_ds2 <- t.test(vghrsweek ~ alcsudmonth,
data=ds2canscreen))
```

```
##
## Welch Two Sample t-test
##
## data: vghrsweek by alcsudmonth
## t = 0.66748, df = 7.9026, p-value = 0.5235
## alternative hypothesis: true difference in means is not equal to 0
## 95 percent confidence interval:
## -9.386757 17.011406
## sample estimates:
## mean in group 0 mean in group 1
##      21.47899      17.66667
```

## Days per week

### Study 1 - CANNOT CALCULATE

#### Study 2

```
(vgdaysweek_cannabismnth_ds2 <- t.test(vgdaysweek ~ alcsudmonth,
data=ds2canscreen))
```

```
##
## Welch Two Sample t-test
##
## data: vgdaysweek by alcsudmonth
## t = -0.29073, df = 5.5096, p-value = 0.7819
## alternative hypothesis: true difference in means is not equal to 0
## 95 percent confidence interval:
```

```
## -2.662564 2.107942
## sample estimates:
## mean in group 0 mean in group 1
##      4.722689      5.000000
```

## MD

### Hours per day

#### *#Study 1*

```
cannabismonth_yes_ds1_vghrsday <- subset(cannabismonth_yes_ds1, select
= c(vghrsday)) #Subset 1i data
cannabismonth_vghrsday_m1i <- apply(cannabismonth_yes_ds1_vghrsday, 2,
mean) #Calculate m1i
cannabismonth_vghrsday_sd1i <- apply(cannabismonth_yes_ds1_vghrsday,
2, sd) #Calculate sd1i
cannabismonth_vghrsday_n1i <- colSums(!
is.na(cannabismonth_yes_ds1_vghrsday)) #Calculate n1i
cannabismonth_no_ds1_vghrsday <- subset(cannabismonth_no_ds1, select =
c(vghrsday)) #Subset 2i data
cannabismonth_vghrsday_m2i <- apply(cannabismonth_no_ds1_vghrsday, 2,
mean) #Calculate m2i
cannabismonth_vghrsday_sd2i <- apply(cannabismonth_no_ds1_vghrsday, 2,
sd) #Calculate sd2i
cannabismonth_vghrsday_n2i <- colSums(!
is.na(cannabismonth_no_ds1_vghrsday)) #Calculate n2i
ds1cannabismonth_meta <- data.frame(m1i =
cannabismonth_vghrsday_m1i, sd1i = cannabismonth_vghrsday_sd1i, n1i =
cannabismonth_vghrsday_n1i, m2i = cannabismonth_vghrsday_m2i, sd2i =
cannabismonth_vghrsday_sd2i, n2i = cannabismonth_vghrsday_n2i) #MA
dataframe
ds1cannabismonth_meta <- escalc(measure="MD", m1i = m1i, sd1i = sd1i,
n1i = n1i, m2i = m2i, sd2i = sd2i, n2i = n2i, data=ds1cannabismonth_meta)
#Calculate yi and vi
```

#### *#Study 2*

```
cannabismonth_yes_ds2_vghrsday <- subset(cannabismonth_yes_ds2, select
= c(vghrsday)) #Subset 1i data
cannabismonth_vghrsday_m1i <- apply(cannabismonth_yes_ds2_vghrsday, 2,
mean) #Calculate m1i
cannabismonth_vghrsday_sd1i <- apply(cannabismonth_yes_ds2_vghrsday,
2, sd) #Calculate sd1i
cannabismonth_vghrsday_n1i <- colSums(!
is.na(cannabismonth_yes_ds2_vghrsday)) #Calculate n1i
cannabismonth_no_ds2_vghrsday <- subset(cannabismonth_no_ds2, select =
c(vghrsday)) #Subset 2i data
cannabismonth_vghrsday_m2i <- apply(cannabismonth_no_ds2_vghrsday, 2,
mean) #Calculate m2i
cannabismonth_vghrsday_sd2i <- apply(cannabismonth_no_ds2_vghrsday, 2,
```

```

sd) #Calculate sd2i
cannabismonth_vghrsday_n2i <- colSums(!
is.na(cannabismonth_no_ds2_vghrsday)) #Calculate n2i
ds2cannabismonth_meta <- data.frame(m1i =
cannabismonth_vghrsday_m1i, sd1i = cannabismonth_vghrsday_sd1i, n1i =
cannabismonth_vghrsday_n1i, m2i = cannabismonth_vghrsday_m2i, sd2i =
cannabismonth_vghrsday_sd2i, n2i = cannabismonth_vghrsday_n2i) #MA
dataframe
ds2cannabismonth_meta <- escalc(measure="MD", m1i = m1i, sd1i = sd1i,
n1i = n1i, m2i = m2i, sd2i = sd2i, n2i = n2i, data=ds2cannabismonth_meta)
#Calculate yi and vi

#FE meta-analysis
(cannabismonth_meta <- rbind(ds1cannabismonth_meta,
ds2cannabismonth_meta))

##      m1i  sd1i n1i  m2i  sd2i n2i  yi  vi
## 1   NaN    NA  0 1.907692 1.377533 65   NA  NA
## 2 3.333333 1.632993 6 4.033613 4.161838 119 -0.7003 0.5900

(cannabismonth_vghrsday_meta <- rma(yi=yi, vi=vi, measure="MD",
method="FE", data=cannabismonth_meta))

##
## Fixed-Effects Model (k = 1)
##
## Test for Heterogeneity:
## Q(df = 0) = 0.0000, p-val = 1.0000
##
## Model Results:
##
## estimate    se    zval    pval  ci.lb  ci.ub
## -0.7003  0.7681 -0.9117  0.3619 -2.2058  0.8052
##
## ---
## Signif. codes:  0 '***' 0.001 '**' 0.01 '*' 0.05 '.' 0.1 ' ' 1

```

## Hours per week

```

#Study 1
cannabismonth_yes_ds1_vghrsweek <- subset(cannabismonth_yes_ds1,
select = c(vghrsweek)) #Subset 1i data
cannabismonth_vghrsweek_m1i <-
apply(cannabismonth_yes_ds1_vghrsweek, 2, mean) #Calculate m1i
cannabismonth_vghrsweek_sd1i <-
apply(cannabismonth_yes_ds1_vghrsweek, 2, sd) #Calculate sd1i
cannabismonth_vghrsweek_n1i <- colSums(!
is.na(cannabismonth_yes_ds1_vghrsweek)) #Calculate n1i
cannabismonth_no_ds1_vghrsweek <- subset(cannabismonth_no_ds1, select
= c(vghrsweek)) #Subset 2i data

```

```

cannabismonth_vghrsweek_m2i <- apply(cannabismonth_no_ds1_vghrsweek,
2, mean) #Calculate m2i
cannabismonth_vghrsweek_sd2i <- apply(cannabismonth_no_ds1_vghrsweek,
2, sd) #Calculate sd2i
cannabismonth_vghrsweek_n2i <- colSums(!
is.na(cannabismonth_no_ds1_vghrsweek)) #Calculate n2i
ds1cannabismonth_meta <- data.frame(m1i =
cannabismonth_vghrsweek_m1i, sd1i = cannabismonth_vghrsweek_sd1i, n1i
= cannabismonth_vghrsweek_n1i, m2i = cannabismonth_vghrsweek_m2i,
sd2i = cannabismonth_vghrsweek_sd2i, n2i =
cannabismonth_vghrsweek_n2i) #MA dataframe
ds1cannabismonth_meta <- escalc(measure="MD", m1i = m1i, sd1i = sd1i,
n1i = n1i, m2i = m2i, sd2i = sd2i, n2i = n2i, data=ds1cannabismonth_meta)
#Calculate yi and vi

```

### #Study 2

```

cannabismonth_yes_ds2_vghrsweek <- subset(cannabismonth_yes_ds2,
select = c(vghrsweek)) #Subset 1i data
cannabismonth_vghrsweek_m1i <-
apply(cannabismonth_yes_ds2_vghrsweek, 2, mean) #Calculate m1i
cannabismonth_vghrsweek_sd1i <-
apply(cannabismonth_yes_ds2_vghrsweek, 2, sd) #Calculate sd1i
cannabismonth_vghrsweek_n1i <- colSums(!
is.na(cannabismonth_yes_ds2_vghrsweek)) #Calculate n1i
cannabismonth_no_ds2_vghrsweek <- subset(cannabismonth_no_ds2, select
= c(vghrsweek)) #Subset 2i data
cannabismonth_vghrsweek_m2i <- apply(cannabismonth_no_ds2_vghrsweek,
2, mean) #Calculate m2i
cannabismonth_vghrsweek_sd2i <- apply(cannabismonth_no_ds2_vghrsweek,
2, sd) #Calculate sd2i
cannabismonth_vghrsweek_n2i <- colSums(!
is.na(cannabismonth_no_ds2_vghrsweek)) #Calculate n2i
ds2cannabismonth_meta <- data.frame(m1i =
cannabismonth_vghrsweek_m1i, sd1i = cannabismonth_vghrsweek_sd1i, n1i
= cannabismonth_vghrsweek_n1i, m2i = cannabismonth_vghrsweek_m2i,
sd2i = cannabismonth_vghrsweek_sd2i, n2i =
cannabismonth_vghrsweek_n2i) #MA dataframe
ds2cannabismonth_meta <- escalc(measure="MD", m1i = m1i, sd1i = sd1i,
n1i = n1i, m2i = m2i, sd2i = sd2i, n2i = n2i, data=ds2cannabismonth_meta)
#Calculate yi and vi

```

### #FE meta-analysis

```

(cannabismonth_meta <- rbind(ds1cannabismonth_meta,
ds2cannabismonth_meta))

```

```

##      m1i  sd1i n1i   m2i   sd2i n2i   yi   vi
## 1   NaN    NA  0 10.40000 10.11774 65    NA    NA
## 2 17.66667 12.46863  6 21.47899 28.25815 119 -3.8123 32.6214

```

```
(cannabismonth_vghrsweek_meta <- rma(yi=yi, vi=vi, measure="MD",
method="FE", data=cannabismonth_meta))
```

```
##
## Fixed-Effects Model (k = 1)
##
## Test for Heterogeneity:
## Q(df = 0) = 0.0000, p-val = 1.0000
##
## Model Results:
##
## estimate      se      zval      pval      ci.lb      ci.ub
## -3.8123      5.7115     -0.6675     0.5045    -15.0067     7.3820
##
## ---
## Signif. codes:  0 '***' 0.001 '**' 0.01 '*' 0.05 '.' 0.1 ' ' 1
```

## Days per week

### *#Study 1*

```
cannabismonth_yes_ds1_vgdaysweek <- subset(cannabismonth_yes_ds1,
select = c(vgdaysweek)) #Subset 1i data
cannabismonth_vgdaysweek_m1i <-
apply(cannabismonth_yes_ds1_vgdaysweek, 2, mean) #Calculate m1i
cannabismonth_vgdaysweek_sd1i <-
apply(cannabismonth_yes_ds1_vgdaysweek, 2, sd) #Calculate sd1i
cannabismonth_vgdaysweek_n1i <- colSums(!
is.na(cannabismonth_yes_ds1_vgdaysweek)) #Calculate n1i
cannabismonth_no_ds1_vgdaysweek <- subset(cannabismonth_no_ds1,
select = c(vgdaysweek)) #Subset 2i data
cannabismonth_vgdaysweek_m2i <-
apply(cannabismonth_no_ds1_vgdaysweek, 2, mean) #Calculate m2i
cannabismonth_vgdaysweek_sd2i <-
apply(cannabismonth_no_ds1_vgdaysweek, 2, sd) #Calculate sd2i
cannabismonth_vgdaysweek_n2i <- colSums(!
is.na(cannabismonth_no_ds1_vgdaysweek)) #Calculate n2i
ds1cannabismonth_meta <- data.frame(m1i =
cannabismonth_vgdaysweek_m1i, sd1i = cannabismonth_vgdaysweek_sd1i,
n1i = cannabismonth_vgdaysweek_n1i, m2i =
cannabismonth_vgdaysweek_m2i, sd2i = cannabismonth_vgdaysweek_sd2i,
n2i = cannabismonth_vgdaysweek_n2i) #MA dataframe
ds1cannabismonth_meta <- escalc(measure="MD", m1i = m1i, sd1i = sd1i,
n1i = n1i, m2i = m2i, sd2i = sd2i, n2i = n2i, data=ds1cannabismonth_meta)
#Calculate yi and vi
```

### *#Study 2*

```
cannabismonth_yes_ds2_vgdaysweek <- subset(cannabismonth_yes_ds2,
select = c(vgdaysweek)) #Subset 1i data
cannabismonth_vgdaysweek_m1i <-
```



```

apply(cannabismonth_yes_ds2_vgdaysweek, 2, mean) #Calculate m1i
cannabismonth_vgdaysweek_sd1i <-
apply(cannabismonth_yes_ds2_vgdaysweek, 2, sd) #Calculate sd1i
cannabismonth_vgdaysweek_n1i <- colSums(!
is.na(cannabismonth_yes_ds2_vgdaysweek)) #Calculate n1i
cannabismonth_no_ds2_vgdaysweek <- subset(cannabismonth_no_ds2,
select = c(vgdaysweek)) #Subset 2i data
cannabismonth_vgdaysweek_m2i <-
apply(cannabismonth_no_ds2_vgdaysweek, 2, mean) #Calculate m2i
cannabismonth_vgdaysweek_sd2i <-
apply(cannabismonth_no_ds2_vgdaysweek, 2, sd) #Calculate sd2i
cannabismonth_vgdaysweek_n2i <- colSums(!
is.na(cannabismonth_no_ds2_vgdaysweek)) #Calculate n2i
ds2cannabismonth_meta <- data.frame(m1i =
cannabismonth_vgdaysweek_m1i, sd1i = cannabismonth_vgdaysweek_sd1i,
n1i = cannabismonth_vgdaysweek_n1i, m2i =
cannabismonth_vgdaysweek_m2i, sd2i = cannabismonth_vgdaysweek_sd2i,
n2i = cannabismonth_vgdaysweek_n2i) #MA dataframe
ds2cannabismonth_meta <- escalc(measure="MD", m1i = m1i, sd1i = sd1i,
n1i = n1i, m2i = m2i, sd2i = sd2i, n2i = n2i, data=ds2cannabismonth_meta)
#Calculate yi and vi

```

#### #FE meta-analysis

```

(cannabismonth_meta <- rbind(ds1cannabismonth_meta,
ds2cannabismonth_meta))

```

```

## m1i sd1i n1i m2i sd2i n2i yi vi
## 1 NaN NA 0 5.092308 2.227127 65 NA NA
## 2 5 2.280351 6 4.722689 2.265902 119 0.2773 0.9098

```

```

(cannabismonth_vgdaysweek_meta <- rma(yi=yi, vi=vi, measure="MD",
method="FE", data=cannabismonth_meta))

```

```

##
## Fixed-Effects Model (k = 1)
##
## Test for Heterogeneity:
## Q(df = 0) = 0.0000, p-val = 1.0000
##
## Model Results:
##
## estimate se zval pval ci.lb ci.ub
## 0.2773 0.9538 0.2907 0.7713 -1.5922 2.1468
##
## ---
## Signif. codes: 0 '***' 0.001 '**' 0.01 '*' 0.05 '.' 0.1 ' ' 1

```
